# Supplementary material for: Photo-induced energy transfer relay of N-heterocyclic carbene catalysis: an asymmetric α-fluorination/isomerization cascade
Source: Royal Society of Chemistry journal article supplement (doi:10.1039/d0cc07264h), 2020-12-12

# Photo-induced energy transfer relay of N-heterocyclic carbene catalysis: An asymmetric $\alpha$ -fluorination/isomerization cascade

Xinhang Jiang,<sup>[a,c,d]</sup> En Li,<sup>[a,c,d]</sup> Jian Chen\*<sup>[c,d]</sup> and Yong Huang\*<sup>[b]</sup>

[a] State Key Laboratory of Chemical Oncogenomics, Peking University Shenzhen Graduate School, Shenzhen, 518055, China

[b] Department of Chemistry, The Hong Kong University of Science and Technology, Clear Water Bay, Hong Kong SAR, China

[c] Pingshan Translational Medicine Center, Shenzhen Bay Laboratory Shenzhen, 518055, China

[d] Shenzhen Public Platform of Drug Screening and Preclinical Evaluation, Peking University Shenzhen Graduate School, Shenzhen, 518055, China

## Support Information

### Table of Contents

|                                                                          |    |
|--------------------------------------------------------------------------|----|
| General methods and materials                                            | 2  |
| Condition screening                                                      | 3  |
| Synthesis of NHC-L                                                       | 6  |
| Synthesis of enal substrates                                             | 7  |
| Synthesis of the chiral ( <i>Z</i> )-allylic fluorides                   | 14 |
| Characterization of the chiral ( <i>Z</i> )-allylic fluorides            | 14 |
| Derivatization of the chiral ( <i>Z</i> )-allylic fluoride ( <b>3a</b> ) | 21 |
| References                                                               | 23 |
| X-ray crystal structure of 4c                                            | 24 |
| Chiral GC spectra                                                        | 30 |
| HPLC spectra                                                             | 54 |
| NMR spectra                                                              | 57 |

## General methods and materials.

All solvents were distilled according to general practice prior to use. All reagents were purchased and used without further purification unless specified otherwise. Solvents for flash column chromatography were technical grade and distilled prior to use. Analytical thin-layer chromatography (TLC) was performed using Huanghai silica gel plates with HSGF 254. Visualization of the developed chromatogram was performed by UV absorbance (254 nm) and appropriate stains. Flash column chromatography was performed using Qingdao Haiyang Chemical HG/T2354-92 silica gel (200-300 mesh) with the indicated solvent system according to standard techniques.  $^1\text{H}$  NMR and  $^{13}\text{C}$  NMR data were recorded on Bruker 400 MHz (100 MHz for  $^{13}\text{C}$ , 376MHz for  $^{19}\text{F}$ ) and 500 MHz (126 MHz for  $^{13}\text{C}$ ) nuclear resonance spectrometers unless otherwise specified, respectively. Chemical shifts ( $\delta$ ) in ppm are reported as quoted relative to the residual signals of chloroform ( $^1\text{H}$  7.26 ppm and  $^{13}\text{C}$  77.16 ppm). Multiplicities are described as: s (singlet), bs (broad singlet), d (doublet), t (triplet), q (quartet), m (multiplet); and coupling constants (J) are reported in Hertz (Hz).  $^{13}\text{C}$  NMR spectra were recorded with total proton decoupling. Chiral HPLC was recorded on a Shimadzu LC-20A spectrometer using Daicel Chiralcel<sup>TM</sup> columns. Chiral GC was recorded on a Shimadzu GC-2014 Gas Chromatography using Astec CHIRALDEXTM  $\beta$ -DM column. HRMS (ESI) analysis was performed by The Analytical Instrumentation Center at Peking University; Shenzhen Graduate School and (HRMS) data were reported with ion mass/charge (m/z) ratios as values in atomic mass units.

## Condition screening

A series of photosensitizers (PSs) were tested in this reaction, and we found using PS-C ( $E_T = 54.2$  kcal mol<sup>-1</sup>) as the photosensitizer can obtain relative high (*Z/E*)-selectivity with the overall good yield and enantioselectivity (Table S1, entry 3)<sup>1,2</sup>.

**Table S1.** Screening of photosensitizers (PSs) for the synergistic energy transfer relay<sup>a</sup>

| entry | PS   | <b>1a</b> / % <sup>b</sup> | ( <i>E</i> )- <b>2a</b> / % <sup>b</sup> | ( <i>Z</i> )- <b>2a</b> / % <sup>b</sup> | ( <i>E</i> )- <b>3a</b> / % <sup>b</sup> | <b>3a</b> / % <sup>b</sup> | ee of <b>3a</b> / % <sup>c</sup> | <b>3a</b> /( <i>E</i> )- <b>3a</b> |
|-------|------|----------------------------|------------------------------------------|------------------------------------------|------------------------------------------|----------------------------|----------------------------------|------------------------------------|
| 1     | PS-A | 7                          | 15                                       | 8                                        | 5                                        | 33                         | 83                               | 6.8:1                              |
| 2     | PS-B | 12                         | 7                                        | 5                                        | 3                                        | 27                         | 83                               | 9.3:1                              |
| 3     | PS-C | 13                         | 10                                       | 7                                        | 4                                        | 32                         | 83                               | 9.2:1                              |
| 4     | PS-D | -                          | -                                        | -                                        | -                                        | -                          | -                                | -                                  |

**PS-A:**  $[\text{Ir}(\text{dF-CF}_3\text{-ppy})_2(\text{dtbbpy})]\text{PF}_6$   
 $E_T = 60.1$  kcal mol<sup>-1</sup> (Weaver<sup>1</sup>)  
 $E_T = 59.4$  kcal mol<sup>-1</sup> (Rueping<sup>2</sup>)

**PS-B:**  $[\text{Ir}(\text{dF-ppy})_2(\text{dtbbpy})]\text{PF}_6$   
 $E_T = 55.7$  kcal mol<sup>-1</sup> (Weaver<sup>1</sup>)

**PS-C:**  $[\text{Ir}(\text{dF-ppy})_2(\text{bpy})]\text{PF}_6$   
 $E_T = 54.2$  kcal mol<sup>-1</sup> (Weaver<sup>1</sup>)

**PS-D:**  $[\text{Ir}(\text{ppy})_3]$   
 $E_T = 55.2$  kcal mol<sup>-1</sup> (Weaver<sup>1</sup>)  
 $E_T = 53.6$  kcal mol<sup>-1</sup> (Rueping<sup>2</sup>)

**PS-E:**  $[\text{Ru}(\text{bpy})_3]\text{Cl}_2$   
 $E_T = 46.8$  kcal mol<sup>-1</sup> (PF<sub>6</sub><sup>-</sup>, Rueping<sup>2</sup>)

**PS-F:**  $[\text{Ir}(\text{dF-CF}_3\text{-ppy})_2(\text{bpy})]\text{PF}_6$   
 $E_T = 60.4$  kcal mol<sup>-1</sup> (Weaver<sup>1</sup>)  
 $E_T = 60.4$  kcal mol<sup>-1</sup> (Rueping<sup>2</sup>)

**PS-G:**  $[\text{Ir}(\text{4-F-ppy})_2(\text{dtbbpy})]\text{PF}_6$   
 $E_T = 63.0$  kcal mol<sup>-1</sup> (Weaver<sup>1</sup>)

**PS-H:**  $[\text{Ir}(\text{4-F-ppy})_2(\text{bpy})]\text{PF}_6$   
 $E_T = 51.4$  kcal mol<sup>-1</sup> (Weaver<sup>1</sup>)

**PS-I:**  $[\text{Ir}(\text{dF-CF}_3\text{-ppy})_2(1,10\text{-Phen})]\text{PF}_6$   
 $E_T = 60.2$  kcal mol<sup>-1</sup> (Weaver<sup>1</sup>)

|   |      |    |    |    |    |    |      |        |
|---|------|----|----|----|----|----|------|--------|
| 5 | PS-E | 15 | 1  | 3  | 17 | 1  | n.d. | 0.1:1  |
| 6 | PS-F | 20 | 7  | 4  | 3  | 17 | 84   | 7.7:1  |
| 7 | PS-G | 17 | 9  | 6  | 4  | 25 | 83   | 9.2:1  |
| 8 | PS-H | 27 | 17 | 14 | 1  | 8  | 85   | 10.4:1 |
| 9 | PS-I | 21 | 11 | 5  | 4  | 21 | 83   | 6.4:1  |

<sup>a</sup>Reaction conditions: **1a** (0.1 mmol), selectfluor (0.15 mmol), NHC-A (10 mol%), PS (1 mol%), NaOAc (0.4 mmol), CHCl<sub>3</sub> (1.5 mL), MeOH (0.5 mmol), irradiation with 45 W blue LEDs, 30 °C (with fan cooling), 12 h. <sup>b</sup>Determined by GC. <sup>c</sup>Determined by chiral GC.

Several bases were tested in this reaction, and we found using PivONa as the base can obtain highest yield with relatively high enantioselectivity and (*Z/E*)-selectivity (**Table S2**, entry 7).

**Table S2.** Screening of bases for the synergistic energy transfer relay<sup>a</sup>

| entry          | base                            | <b>1a</b> / % <sup>b</sup> | ( <i>E</i> )- <b>2a</b><br>/ % <sup>b</sup> | ( <i>Z</i> )- <b>2a</b><br>/ % <sup>b</sup> | ( <i>E</i> )- <b>3a</b><br>/ % <sup>b</sup> | <b>3a</b> / % <sup>b</sup> | ee of <b>3a</b><br>/ % <sup>c</sup> | <b>3a</b> /( <i>E</i> )- <b>3a</b> |
|----------------|---------------------------------|----------------------------|---------------------------------------------|---------------------------------------------|---------------------------------------------|----------------------------|-------------------------------------|------------------------------------|
| 1              | NaOAc                           | 7                          | 15                                          | 8                                           | 5                                           | 33                         | 83                                  | 6.8:1                              |
| 2 <sup>d</sup> | K <sub>2</sub> CO <sub>3</sub>  | 67                         | -                                           | 1                                           | 1                                           | 1                          | n.d.                                | 0.7:1                              |
| 3 <sup>d</sup> | Cs <sub>2</sub> CO <sub>3</sub> | 2                          | 1                                           | 4                                           | 20                                          | 11                         | 39                                  | 0.5:1                              |
| 4 <sup>d</sup> | KOAc                            | -                          | 9                                           | 13                                          | 5                                           | 31                         | 59                                  | 6.8:1                              |
| 5 <sup>d</sup> | CsOAc                           | -                          | 14                                          | 16                                          | 4                                           | 25                         | 54                                  | 6.4:1                              |
| 6              | lithium isobutyrate             | 9                          | 4                                           | 5                                           | 4                                           | 24                         | 84                                  | 6.5:1                              |
| 7              | PivONa                          | 2                          | 7                                           | 8                                           | 6                                           | 39                         | 83                                  | 6.8:1                              |

<sup>a</sup>Reaction conditions: **1a** (0.1 mmol), selectfluor (0.15 mmol), NHC-A (10 mol%), PS-A (0.001 mmol), base (0.4 mmol), CHCl<sub>3</sub> (1.5 mL), MeOH (0.5 mmol), irradiation with 45 W blue LEDs, 30 °C (with fan cooling), 12 h. <sup>b</sup>Determined by GC. <sup>c</sup>Determined by chiral GC. <sup>d</sup>Base (0.2 mmol). N.d. = not determined.

A series of solvents were tested in this reaction, and we found using CHCl<sub>3</sub>/MeOH (15:1) as the mixed solvent can obtain relative high (*Z/E*)-selectivity with the highest yield and enantioselectivity (**Table S3**, entry 9).

**Table S3.** Screening of solvents for the synergistic energy transfer relay<sup>a</sup>

| entry | solvent | co-solvent | <b>1a</b> / % <sup>b</sup> | <b>3a'</b> / <b>3a''</b> / % <sup>b</sup> | ee / % <sup>c</sup> | <i>Z/E</i> | <b>3a</b> / % <sup>b</sup> | ee of <b>3a</b> | <b>3a</b> /( <i>E</i> )- <b>3a</b> |
|-------|---------|------------|----------------------------|-------------------------------------------|---------------------|------------|----------------------------|-----------------|------------------------------------|
|-------|---------|------------|----------------------------|-------------------------------------------|---------------------|------------|----------------------------|-----------------|------------------------------------|

|    |                   |                             |    |    |      |       |       |    | /% <sup>c</sup> |
|----|-------------------|-----------------------------|----|----|------|-------|-------|----|-----------------|
| 1  | CHCl <sub>3</sub> | 5.0 eq.<br>MeOH             | 6  | -  | -    | -     | 33    | 83 | 6.8:1           |
| 2  | CHCl <sub>3</sub> | 5.0 eq. EtOH                | 10 | 14 | 82   | -     | 8     | 83 | -               |
| 3  | CHCl <sub>3</sub> | 5.0 eq. <sup>t</sup> PrOH   | 34 | 1  | n.d. | -     | 17    | 84 | -               |
| 4  | DCE               | 5.0 eq.<br>MeOH             | 9  | -  | -    | -     | 28    | 81 | 2.9:1           |
| 5  | DCE               | 0.05 mL<br>MeOH             | 8  | -  | -    | -     | 33    | 79 | 4.3:1           |
| 6  | DCE               | 0.1 mL<br>MeOH              | 10 | -  | -    | -     | 33    | 78 | 5.5:1           |
| 7  | MeCN              | 5.0 eq.<br>MeOH             | 96 | -  | -    | -     | trace | -  | -               |
| 8  | CHCl <sub>3</sub> | 0.05 mL<br>MeOH             | 11 | -  | -    | -     | 38    | 83 | 6.6:1           |
| 9  | CHCl <sub>3</sub> | 0.1 mL<br>MeOH              | 2  | -  | -    | -     | 45    | 84 | 6.5:1           |
| 10 | -                 | 1.5 mL<br>MeOH              | 11 | -  | -    | -     | 18    | 60 | 2.7:1           |
| 11 | CHCl <sub>3</sub> | 0.1 mL EtOH                 | 3  | 32 | 84   | 5.9:1 | 6     | 83 | -               |
| 12 | CHCl <sub>3</sub> | 0.1 mL<br><sup>t</sup> PrOH | 12 | 4  | n.d. | -     | 18    | 84 | 6.7:1           |

<sup>a</sup>Reaction conditions: **1a** (0.1 mmol), selectfluor (0.15 mmol), NHC-A (10 mol%), PS-A (0.001 mmol), NaOAc (0.4 mmol), CHCl<sub>3</sub> (1.5 mL), alcohol (0.5 mmol), irradiation with 45 W blue LEDs, 30 °C (with fan cooling), 12 h. <sup>b</sup>Determined by GC.

<sup>c</sup>Determined by chiral GC. DCE = 1,2-dichloroethane. <sup>t</sup>PrOH = isopropyl alcohol.

Different loading ratios of **1a** and selectfluor were tested in this reaction, and we found using **1a**/selectfluor (1.5:1) as the starting materials can obtain relative high yield with the enantioselectivity and (*Z/E*)-selectivity staying untouched (**Table S4**, entry 3).

**Table S4.** Screening of the loading ratio of **1a** and selectfluor for the synergistic energy transfer really<sup>a</sup>

| entry | <b>1a</b>     | select-fluor | <b>1a</b> / % <sup>b</sup> | ( <i>E</i> )- <b>2a</b><br>/ % <sup>b</sup> | ( <i>Z</i> )- <b>2a</b><br>/ % <sup>b</sup> | ( <i>E</i> )- <b>3a</b><br>/ % <sup>b</sup> | <b>3a</b> / % <sup>b</sup> | ee of <b>3a</b><br>/ % <sup>c</sup> | <b>3a</b> /( <i>E</i> )- <b>3a</b> |
|-------|---------------|--------------|----------------------------|---------------------------------------------|---------------------------------------------|---------------------------------------------|----------------------------|-------------------------------------|------------------------------------|
| 1     | 0.1 mmol      | 0.15 mmol    | 6                          | 15                                          | 8                                           | 5                                           | 33                         | 83                                  | 6.8:1                              |
| 2     | 0.125<br>mmol | 0.1 mmol     | 8                          | 4                                           | 6                                           | 7                                           | 48                         | 83                                  | 6.7:1                              |

|   |           |          |    |    |    |   |    |    |       |
|---|-----------|----------|----|----|----|---|----|----|-------|
| 3 | 0.15 mmol | 0.1 mmol | 10 | 4  | 7  | 9 | 58 | 83 | 6.8:1 |
| 4 | 0.175     | 0.1 mmol | -  | 19 | 15 | 9 | 59 | 83 | 6.7:1 |

mmol

<sup>a</sup>Reaction conditions: **1a** (0.1 mmol), selectfluor (0.15 mmol), NHC-A (10 mol%), PS-A (0.001 mmol), NaOAc (0.4 mmol), CHCl<sub>3</sub> (1.5 mL), MeOH (0.5 mmol), irradiation with 45 W blue LEDs, 30 °C (with fan cooling), 12 h. <sup>b</sup>Determined by GC.

<sup>c</sup>Determined by chiral GC.

A series of NHCs were tested in this reaction, and we found using NHC-N as the pre-catalyst can obtain highest yield and enantioselectivity with satisfactory (*Z/E*)-selectivity (**Table S5**).

**Table S5.** The influence of NHC skeleton<sup>a</sup>

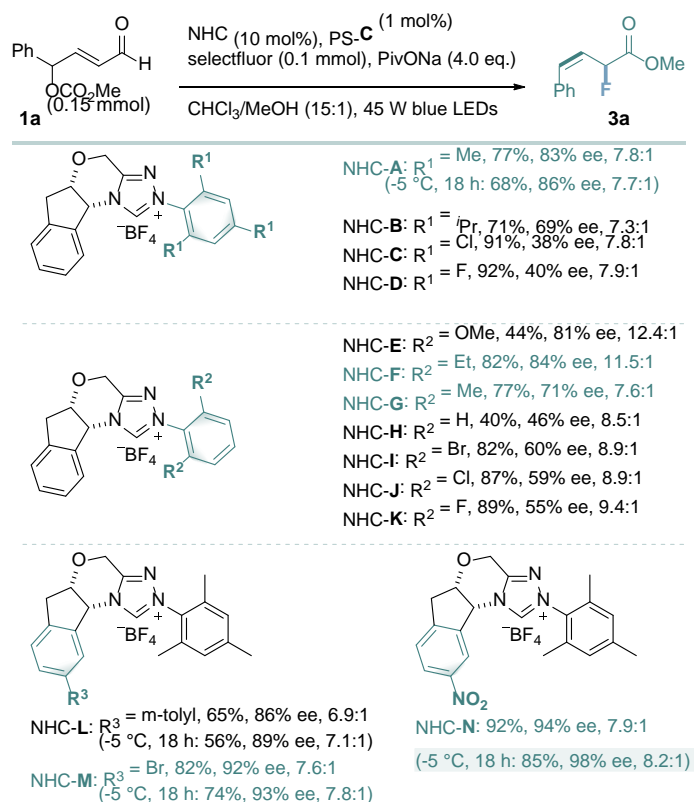

<sup>a</sup>Reaction conditions: enal **1a** (0.15 mmol), selectfluor (0.1 mmol), NHC (10 mol%), PS-C (1 mmol%), PivONa (0.4 mmol), CHCl<sub>3</sub>/MeOH (1.5 mL/0.1 mL), irradiation with 45 W blue LEDs, 30 °C (with fan cooling), 12 h. The yield and (*Z/E*) ratio were determined by GC. The ee value was determined by chiral GC.

### Synthesis of NHC-L<sup>3</sup>

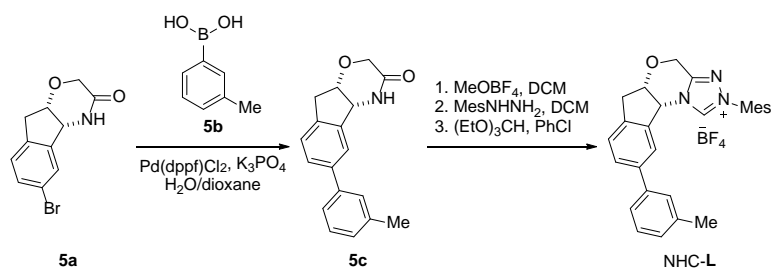

Following the reported procedure by Wang et al., we synthesized NHC-L as below<sup>3</sup>:

To a suspension of **5a** (2.66 g, 10.0 mmol), arylboronic acid **5b** (13.0 mmol), Pd(dppf)Cl<sub>2</sub> (0.365 g, 0.5 mmol) in dioxane (30.0 mL) was added 2 M aq. K<sub>3</sub>PO<sub>4</sub> (4.24 g, 10.0 mmol). After being degassed under Ar for 15 min, the reaction mixture was heated at 80 °C until all the starting materials consumed. The dioxane was evaporated under vacuum and the aqueous layer was extracted with ethyl acetate (EtOAc, 3×50.0 mL). The combined organic layer was washed with brine, dried over Na<sub>2</sub>SO<sub>4</sub> and concentrated under reduced pressure. The remained mixture was purified by flash column chromatography (1:2 hexane/EtOAc) to afford **5c**.

To a solution of **5c** (5.0 mmol) in CH<sub>2</sub>Cl<sub>2</sub> (30.0 mL) was added Me<sub>3</sub>OBF<sub>4</sub> (0.78 g, 5.5 mmol), and then stirred overnight at room temperature. Freshly prepared MesNHNH<sub>2</sub> (1.50 g, 10.0 mmol) in CH<sub>2</sub>Cl<sub>2</sub> (5.0 mL) was added, and the mixture was stirred for 10 h. Then, CH<sub>2</sub>Cl<sub>2</sub> was evaporated in vacuo, and the residue was dissolved in PhCl (30.0 mL) followed by the addition of (EtO)<sub>3</sub>CH (8.0 mL, 50 mmol). The mixture was heated at 110 °C for 48 h. The solvent was evaporated, and the residue was purified by flash column chromatography (1:1 to 1:2 hexane/EtOAc) to afford NHC-**L**. Yield = 28%, white solid; <sup>1</sup>H NMR (400 MHz, DMSO) δ 11.21 (s, 1H), 7.83 (s, 1H), 7.66 (d, *J* = 7.9 Hz, 1H), 7.50 (d, *J* = 7.9 Hz, 1H), 7.43 (d, *J* = 7.8 Hz, 2H), 7.34 (t, *J* = 7.6 Hz, 1H), 7.26-7.08 (m, 3H), 6.13 (d, *J* = 4.0 Hz, 1H), 5.26 (d, *J* = 16.0 Hz, 1H), 5.09 (d, *J* = 16.0 Hz, 1H), 5.02 (t, *J* = 4.4 Hz, 1H), 3.51 (dd, *J* = 17.2, 4.8 Hz, 1H), 3.19 (d, *J* = 17.2 Hz, 1H), 2.36 (s, 6H), 2.14 (s, 6H). <sup>13</sup>C NMR (101 MHz, CDCl<sub>3</sub>) δ 155.27, 146.68, 144.99, 144.82, 143.15, 142.02, 139.98, 136.42, 134.64, 133.95, 133.37, 133.11, 132.63, 131.08, 129.05, 127.26, 82.18, 66.24, 64.90, 41.86, 26.30, 25.82, 22.06. HRMS (ESI-TOF) [M-BF<sub>4</sub>]<sup>+</sup> calculated for [C<sub>28</sub>H<sub>28</sub>ON<sub>3</sub>]<sup>+</sup> 422.2232, observed 422.2233. [α]<sup>25</sup><sub>D</sub> = 7.8 (c = 1.0, CHCl<sub>3</sub>).

#### Synthesis of enal substrates<sup>4</sup>

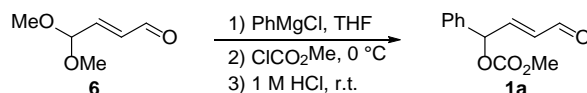

**(*E*)-Methyl (4-oxo-1-phenylbut-2-en-1-yl) (1a)**<sup>4</sup>. To a solution of enal **6** (1.3 g, 10.0 mmol) in anhydrous THF (25.0 ml) at 0 °C was added PhMgCl (12.0 mL, 1.0 M in THF, 12.0 mmol) over 5 min. The reaction mixture was stirred for 30 min at the same temperature and methyl chloroformate (0.93 mL, 12.0 mmol) was added via syringe. After 2 h, the reaction mixture was quenched by 1 M HCl (5.0 mL) and stirred for 2 h at room temperature. The organic layer was separated, and the aqueous layer was extracted with diethyl ether. The combined organic layers were washed with brine, dried over NaSO<sub>4</sub>, and concentrated under reduced pressure. The residue was purified by flash column chromatography (20:1 to 10:1 hexane/EtOAc) to afford enal **1a** (1.65 g, 75% overall yield). <sup>1</sup>H NMR (400 MHz, CDCl<sub>3</sub>) δ 9.57 (d, *J* = 7.8 Hz, 1H), 7.47-7.23 (m, 5H), 6.87 (dd, *J* = 15.7, 4.8 Hz, 1H), 6.49-6.13 (m, 2H), 3.79 (s, 3H). <sup>13</sup>C NMR (101 MHz, CDCl<sub>3</sub>) δ 192.70 (s), 154.60 (s), 151.80 (s), 135.98 (s), 131.41 (s), 129.23 (s), 128.98 (s), 127.29 (s), 77.77 (s), 55.12 (s). HRMS (ESI-TOF) [M+Na]<sup>+</sup> calculated for [C<sub>12</sub>H<sub>12</sub>O<sub>4</sub>Na]<sup>+</sup> 243.0628, observed 243.0629.

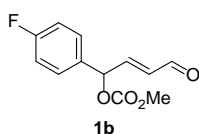

**(*E*)-1-(4-fluorophenyl)-4-oxobut-2-en-1-yl methyl carbonate** was prepared from enal **6**, 4-

fluorophenylmagnesium bromide, methyl chloroformate following the same procedure that was used for preparation of enal **1a** (purified by flash column chromatography with 20:1 to 10:1 hexane/EtOAc).  $^1\text{H}$  NMR (400 MHz,  $\text{CDCl}_3$ )  $\delta$  9.58 (d,  $J = 7.7$  Hz, 1H), 7.50-7.28 (m, 2H), 7.17-6.96 (m, 2H), 6.84 (dd,  $J = 15.8, 4.6$  Hz, 1H), 6.32 (ddd,  $J = 8.1, 7.0, 3.2$  Hz, 2H), 3.79 (s, 3H).  $^{13}\text{C}$  NMR (101 MHz,  $\text{CDCl}_3$ )  $\delta$  192.54 (s), 163.05 (d,  $J = 248.9$  Hz), 154.52 (s), 151.33 (s), 131.55 (s), 129.37 (d,  $J = 8.5$  Hz), 116.01 (d,  $J = 21.8$  Hz), 77.02 (s), 55.17 (s). HRMS (ESI-TOF)  $[\text{M}+\text{Na}]^+$  calculated for  $[\text{C}_{12}\text{H}_{11}\text{O}_4\text{FNa}]^+$  261.0534, observed 261.0531.

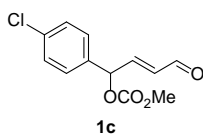

**(E)-1-(4-chlorophenyl)-4-oxobut-2-en-1-yl methyl carbonate** was prepared from enal **6**, 4-chlorophenylmagnesium bromide, methyl chloroformate following the same procedure that was used for preparation of enal **1a** (purified by flash column chromatography: 5-10% EtOAc in hexanes).  $^1\text{H}$  NMR (400 MHz,  $\text{CDCl}_3$ )  $\delta$  9.58 (d,  $J = 7.6$  Hz, 1H), 7.59-7.15 (m, 4H), 6.82 (dd,  $J = 15.7, 4.8$  Hz, 1H), 6.30 (ddd,  $J = 10.3, 6.0, 4.6$  Hz, 2H), 3.80 (s, 3H).  $^{13}\text{C}$  NMR (101 MHz,  $\text{CDCl}_3$ )  $\delta$  192.46 (s), 154.49 (s), 151.00 (s), 135.28 (s), 134.50 (s), 131.69 (s), 129.23 (s), 128.70 (s), 76.98 (s), 55.22 (s). HRMS (ESI-TOF)  $[\text{M}+\text{Na}]^+$  calculated for  $[\text{C}_{12}\text{H}_{11}\text{O}_4\text{ClNa}]^+$  277.0238, observed 277.0239.

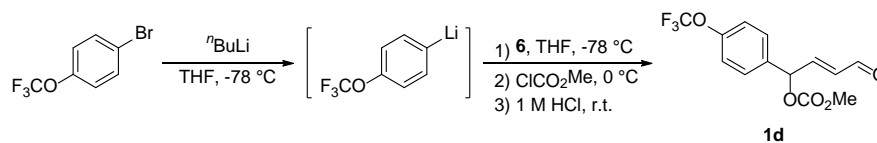

**(E)-methyl (4-oxo-1-(4-(trifluoromethoxy)phenyl)but-2-en-1-yl) carbonate (1d)**<sup>4</sup>. To a solution of bromo-4-(trifluoromethoxy)benzene (6.0 mmol) in anhydrous THF (10.0 mL) at  $-78$  °C was added  $n\text{BuLi}$  (6.0 mmol) over 5 min. The reaction was stirred for 30 min at the same temperature and a solution of enal **6** (5.0 mmol) in THF (5 mL) was added via syringe. The mixture was slowly warmed to  $0$  °C and methyl chloroformate (6.0 mmol) was added at the same temperature. The reaction was monitored by TLC and quenched with 1 M HCl (5.0 mL). The resulting mixture was stirred at room temperature for 2 h. The organic layer was separated and the aqueous layer was extracted with diethyl ether ( $3 \times 20.0$  mL). The combined organic layer was washed with brine, dried over  $\text{NaSO}_4$ , and concentrated under reduced pressure. The residue was purified by flash column chromatography (20:1 to 10:1 hexane/EtOAc) to afford enal **1d** (40% overall yield).  $^1\text{H}$  NMR (500 MHz,  $\text{CDCl}_3$ )  $\delta$  9.59 (d,  $J = 7.7$  Hz, 1H), 7.50-7.33 (m, 2H), 7.25 (d,  $J = 8.8$  Hz, 2H), 6.84 (dd,  $J = 15.9, 4.6$  Hz, 1H), 6.33 (m,  $J = 8.1, 4.8, 1.6$  Hz, 2H), 3.81 (s, 3H).  $^{13}\text{C}$  NMR (126 MHz,  $\text{CDCl}_3$ )  $\delta$  192.45 (s), 176.61 (s), 154.57 (s), 150.90 (s), 149.77 (s), 134.75 (s), 131.86 (s), 129.01 (s), 121.48 (s), 120.37 (d,  $J = 257.8$  Hz), 55.32 (s). HRMS (ESI-TOF)  $[\text{M}+\text{Na}]^+$  calculated for  $[\text{C}_{13}\text{H}_{11}\text{O}_5\text{F}_3\text{Na}]^+$  327.0451, observed 327.0449.

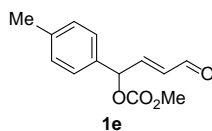



**(E)-methyl (4-oxo-1-(p-tolyl)but-2-en-1-yl) carbonate** was prepared from 4-bromotoluene, *n*-butyllithium, enal **6** and methyl chloroformate following the same procedure that was used for preparation of enal **1d** (purified by flash column chromatography with 20:1 to 10:1 hexane/EtOAc). <sup>1</sup>H NMR (500 MHz, CDCl<sub>3</sub>) δ 9.57 (d, J = 7.7 Hz, 1H), 7.33 – 7.23 (m, 2H), 7.20 (d, J = 8.0 Hz, 2H), 6.86 (dd, J = 15.7, 4.8 Hz, 1H), 6.33 (ddd, J = 15.7, 7.7, 1.7 Hz, 1H), 6.28 (dd, J = 4.7, 1.6 Hz, 1H), 3.79 (s, 3H), 2.35 (s, 3H). <sup>13</sup>C NMR (126 MHz, CDCl<sub>3</sub>) δ 192.83 (s), 154.72 (s), 152.11 (s), 139.39 (s), 133.07 (s), 131.37 (s), 129.73 (s), 127.40 (s), 77.81 (s), 55.15 (s), 21.23 (s). HRMS (ESI-TOF) [M+Na]<sup>+</sup> calculated for [C<sub>13</sub>H<sub>14</sub>O<sub>4</sub>Na]<sup>+</sup> 257.0784, observed 257.0781.

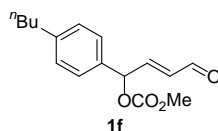

**(E)-1-(4-butylphenyl)-4-oxobut-2-en-1-yl methyl carbonate** was prepared from 1-bromo-4-butylbenzene, *n*-butyllithium, enal **6** and methyl chloroformate following the same procedure that was used for preparation of enal **1d** (purified by flash column chromatography with 20:1 to 10:1 hexane/EtOAc). <sup>1</sup>H NMR (500 MHz, CDCl<sub>3</sub>) δ 9.58 (d, J = 7.7 Hz, 1H), 7.27 (t, J = 5.9 Hz, 2H), 7.20 (d, J = 8.1 Hz, 2H), 6.87 (dd, J = 15.7, 4.8 Hz, 1H), 6.38 – 6.30 (m, 1H), 6.31 – 6.28 (m, 1H), 3.79 (s, 3H), 2.60 (d, J = 7.8 Hz, 2H), 1.65 – 1.49 (m, 2H), 1.34 (dq, J = 14.7, 7.4 Hz, 2H), 0.92 (t, J = 7.4 Hz, 3H). <sup>13</sup>C NMR (126 MHz, CDCl<sub>3</sub>) δ 192.82 (s), 154.73 (s), 152.14 (s), 144.37 (s), 133.19 (s), 131.35 (s), 129.09 (s), 127.41 (s), 77.83 (s), 55.14 (s), 35.38 (s), 33.48 (s), 22.32 (s), 13.91 (s). HRMS (ESI-TOF) [M+Na]<sup>+</sup> calculated for [C<sub>16</sub>H<sub>20</sub>O<sub>4</sub>Na]<sup>+</sup> 299.1254, observed 299.1255.

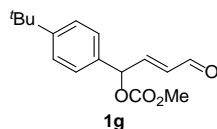

**(E)-1-(4-(tert-butyl)phenyl)-4-oxobut-2-en-1-yl methyl carbonate** was prepared from 1-bromo-4-tert-butylbenzene, *n*-butyllithium, enal **6**, and methyl chloroformate following the same procedure that was used for preparation of enal **1d** (purified by flash column chromatography with 20:1 to 10:1 hexane/EtOAc). <sup>1</sup>H NMR (500 MHz, CDCl<sub>3</sub>) δ 9.58 (d, J = 7.7 Hz, 1H), 7.48 – 7.35 (m, 2H), 7.33 – 7.28 (m, 2H), 6.87 (dd, J = 15.6, 4.8 Hz, 1H), 6.40 – 6.27 (m, 2H), 3.79 (s, 3H), 1.31 (s, 9H). <sup>13</sup>C NMR (126 MHz, CDCl<sub>3</sub>) δ 192.84 (s), 154.75 (s), 152.54 (s), 152.12 (s), 132.95 (s), 131.38 (s), 127.19 (s), 126.01 (s), 77.75 (s), 55.15 (s), 34.71 (s), 31.23 (s). HRMS (ESI-TOF) [M+Na]<sup>+</sup> calculated for [C<sub>16</sub>H<sub>20</sub>O<sub>4</sub>Na]<sup>+</sup> 299.1254, observed 299.1256.

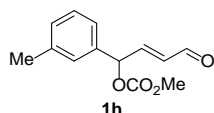

**(E)-methyl (4-oxo-1-(m-tolyl)but-2-en-1-yl) carbonate** was prepared from 1-bromo-3-isopropylbenzene, *n*-butyllithium, enal **6** and methyl chloroformate following the same procedure that was used for preparation of enal **1d** (purified by flash column chromatography with 20:1 to 10:1 hexane/EtOAc). <sup>1</sup>H NMR (400 MHz, CDCl<sub>3</sub>) δ 9.58 (d, J = 7.7 Hz, 1H), 7.32 – 7.26 (m, 1H),

7.20 – 7.11 (m, 2H), 6.86 (dd,  $J = 15.7, 4.8$  Hz, 1H), 6.33 (ddd,  $J = 15.7, 7.7, 1.6$  Hz, 1H), 6.28 (dd,  $J = 4.8, 1.6$  Hz, 1H), 3.80 (s, 3H), 2.36 (s, 3H).  $^{13}\text{C}$  NMR (101 MHz,  $\text{CDCl}_3$ )  $\delta$  192.76 (s), 154.62 (s), 151.97 (s), 138.86 (s), 135.85 (s), 131.30 (s), 130.01 (s), 128.87 (s), 127.86 (s), 124.34 (s), 77.85 (s), 55.12 (s), 21.30 (s). HRMS (ESI-TOF)  $[\text{M}+\text{Na}]^+$  calculated for  $[\text{C}_{13}\text{H}_{14}\text{O}_4\text{Na}]^+$  257.0784, observed 257.0785.

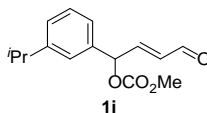

**(E)-1-(3-isopropylphenyl)-4-oxobut-2-en-1-yl methyl carbonate** was prepared from 1-bromo-3-methylbenzene, *n*-butyllithium, enal **6** and methyl chloroformate following the same procedure that was used for preparation of enal **1d** (purified by flash column chromatography with 20:1 to 10:1 hexane/EtOAc).  $^1\text{H}$  NMR (500 MHz,  $\text{CDCl}_3$ )  $\delta$  9.59 (d,  $J = 7.6$  Hz, 1H), 7.32 (t,  $J = 7.6$  Hz, 1H), 7.25 (m, 1H), 7.22 – 7.16 (m, 2H), 6.88 (dd,  $J = 15.6, 4.9$  Hz, 1H), 6.44 – 6.24 (m, 2H), 3.80 (s, 3H), 2.91 (dd,  $J = 13.8, 6.9$  Hz, 1H), 1.25 (d,  $J = 6.9$  Hz, 6H).  $^{13}\text{C}$  NMR (126 MHz,  $\text{CDCl}_3$ )  $\delta$  192.85 (s), 154.73 (s), 152.14 (s), 149.92 (s), 135.92 (s), 131.36 (s), 129.05 (s), 127.39 (s), 125.54 (s), 124.82 (s), 78.08 (s), 55.18 (s), 34.09 (s), 23.91 (s). HRMS (ESI-TOF)  $[\text{M}+\text{Na}]^+$  calculated for  $[\text{C}_{15}\text{H}_{18}\text{O}_4\text{Na}]^+$  285.1097, observed 285.1100.

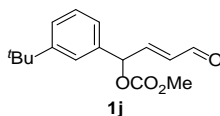

**(E)-1-(3-(tert-butyl)phenyl)-4-oxobut-2-en-1-yl methyl carbonate** was prepared from 1-bromo-3-(tert-butyl)benzene, *n*-butyllithium, enal **6** and methyl chloroformate following the same procedure that was used for preparation of enal **1d** (purified by flash column chromatography with 20:1 to 10:1 hexane/EtOAc).  $^1\text{H}$  NMR (500 MHz,  $\text{CDCl}_3$ )  $\delta$  9.59 (d,  $J = 7.8$  Hz, 1H), 7.41 (m, 1H), 7.35 (m, 2H), 7.21 – 7.16 (m, 1H), 6.95 – 6.78 (m, 1H), 6.34 (m, 2H), 3.81 (s, 3H), 1.32 (s, 9H).  $^{13}\text{C}$  NMR (126 MHz,  $\text{CDCl}_3$ )  $\delta$  192.83 (s), 176.61 (s), 154.75 (s), 152.21 (s), 135.64 (s), 131.35 (s), 128.80 (s), 126.44 (s), 124.48 (s), 124.30 (s), 78.27 (s), 55.17 (s), 34.82 (s), 31.28 (s). HRMS (ESI-TOF)  $[\text{M}+\text{Na}]^+$  calculated for  $[\text{C}_{16}\text{H}_{20}\text{O}_4\text{Na}]^+$  299.1254, observed 299.1255.

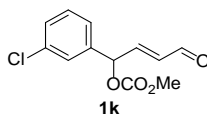

**(E)-1-(3-chlorophenyl)-4-oxobut-2-en-1-yl methyl carbonate** was prepared from enal **6**, 3-chlorophenylmagnesium bromide and methyl chloroformate following the same procedure that was used for preparation of enal **1a** (purified by flash column chromatography with 20:1 to 10:1 hexane/EtOAc).  $^1\text{H}$  NMR (500 MHz,  $\text{CDCl}_3$ )  $\delta$  9.58 (d,  $J = 7.6$  Hz, 1H), 7.40 – 7.30 (m, 3H), 7.28 – 7.21 (m, 1H), 6.82 (dd,  $J = 15.7, 4.8$  Hz, 1H), 6.33 (ddd,  $J = 15.7, 7.6, 1.6$  Hz, 1H), 6.28 (dd,  $J = 4.8, 1.5$  Hz, 1H), 3.81 (s, 3H).  $^{13}\text{C}$  NMR (126 MHz,  $\text{CDCl}_3$ )  $\delta$  192.47 (s), 154.45 (s), 150.77 (s), 137.96 (s), 134.93 (s), 131.80 (s), 130.29 (s), 129.41 (s), 127.33 (s), 125.37 (s), 76.91 (s), 55.27 (s). HRMS (ESI-TOF)  $[\text{M}+\text{Na}]^+$  calculated for  $[\text{C}_{12}\text{H}_{11}\text{O}_4\text{ClNa}]^+$  277.0238, observed 277.0231.

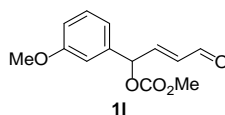

**(E)-1-(3-methoxyphenyl)-4-oxobut-2-en-1-yl methyl carbonate** was prepared from enal **6**, 3-methoxyphenylmagnesium bromide and methyl chloroformate following the same procedure that was used for preparation of enal **1a** (purified by flash column chromatography with 20:1 to 10:1 hexane/EtOAc). <sup>1</sup>H NMR (400 MHz, CDCl<sub>3</sub>) δ 9.57 (d, J = 7.7 Hz, 1H), 7.38 – 7.20 (m, 1H), 7.00 – 6.73 (m, 4H), 6.48 – 6.21 (m, 2H), 3.80 (s, 3H), 3.80 (s, 3H). <sup>13</sup>C NMR (101 MHz, CDCl<sub>3</sub>) δ 192.72 (s), 159.96 (s), 154.58 (s), 151.71 (s), 137.43 (s), 131.39 (s), 130.08 (s), 119.40 (s), 114.65 (s), 112.71 (s), 77.64 (s), 55.20 (d, J = 9.8 Hz). HRMS (ESI-TOF) [M+Na]<sup>+</sup> calculated for [C<sub>12</sub>H<sub>14</sub>O<sub>5</sub>Na]<sup>+</sup> 273.0733, observed 273.0734.

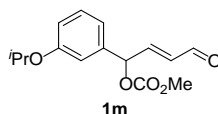

**(E)-1-(3-isopropoxyphenyl)-4-oxobut-2-en-1-yl methyl carbonate** was prepared from 1-bromo-3-isopropoxybenzene, *n*-butyllithium, enal **6** and methyl chloroformate following the same procedure that was used for preparation of enal **1d** (purified by flash column chromatography with 20:1 to 10:1 hexane/EtOAc). <sup>1</sup>H NMR (500 MHz, CDCl<sub>3</sub>) δ 9.58 (d, J = 7.7 Hz, 1H), 7.33 – 7.24 (m, 1H), 6.94 – 6.78 (m, 4H), 6.33 (ddd, J = 15.7, 7.7, 1.6 Hz, 1H), 6.27 (dd, J = 4.8, 1.6 Hz, 1H), 4.55 (dt, J = 12.1, 6.1 Hz, 1H), 3.80 (s, 3H), 1.33 (d, J = 6.1 Hz, 6H). <sup>13</sup>C NMR (126 MHz, CDCl<sub>3</sub>) δ 192.78 (s), 158.38 (s), 154.69 (s), 151.84 (s), 137.50 (s), 131.46 (s), 130.13 (s), 119.22 (s), 116.21 (s), 114.85 (s), 77.74 (s), 69.97 (s), 55.20 (s), 21.97 (s). HRMS (ESI-TOF) [M+Na]<sup>+</sup> calculated for [C<sub>15</sub>H<sub>18</sub>O<sub>5</sub>Na]<sup>+</sup> 301.1046, observed 301.1048

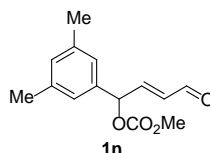

**(E)-1-(3,5-dimethylphenyl)-4-oxobut-2-en-1-yl methyl carbonate** was prepared from 1-bromo-3,5-dimethylbenzene, *n*-butyllithium, enal **6** and methyl chloroformate following the same procedure that was used for preparation of enal **1d** purified by flash column chromatography with 20:1 to 10:1 hexane/EtOAc). <sup>1</sup>H NMR (500 MHz, CDCl<sub>3</sub>) δ 9.58 (d, J = 7.7 Hz, 1H), 6.99 (d, J = 13.7 Hz, 3H), 6.85 (dd, J = 15.7, 4.8 Hz, 1H), 6.33 (ddd, J = 15.7, 7.7, 1.6 Hz, 1H), 6.24 (dd, J = 4.8, 1.6 Hz, 1H), 3.80 (s, 3H), 2.32 (d, J = 0.4 Hz, 6H). <sup>13</sup>C NMR (126 MHz, CDCl<sub>3</sub>) δ 192.89 (s), 154.72 (s), 152.20 (s), 138.79 (s), 135.89 (s), 131.27 (s), 130.96 (s), 125.03 (s), 78.00 (s), 55.16 (s), 21.24 (s). HRMS (ESI-TOF) [M+Na]<sup>+</sup> calculated for [C<sub>15</sub>H<sub>18</sub>O<sub>5</sub>Na]<sup>+</sup> 271.0941, observed 271.0942.

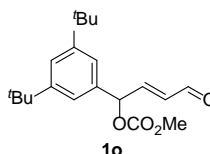

**(E)-1-(3,5-di-tert-butylphenyl)-4-oxobut-2-en-1-yl methyl carbonate** was prepared from 1-bromo-3,5-di-tert-butylbenzene, *n*-butyllithium, enal **6** and methyl chloroformate following the

same procedure that was used for preparation of enal **1d** (purified by flash column chromatography with 20:1 to 10:1 hexane/EtOAc). <sup>1</sup>H NMR (500 MHz, CDCl<sub>3</sub>) δ 9.59 (d, J = 7.9 Hz, 1H), 7.45 (t, J = 1.6 Hz, 1H), 7.19 (d, J = 1.6 Hz, 2H), 6.90 (dd, J = 15.9, 4.6 Hz, 1H), 6.46 – 6.27 (m, 2H), 3.81 (s, 3H), 1.32 (s, 18H). <sup>13</sup>C NMR (126 MHz, CDCl<sub>3</sub>) δ 192.95 (s), 154.80 (s), 152.59 (s), 151.74 (s), 135.11 (s), 131.15 (s), 123.54 (s), 121.56 (s), 78.64 (s), 55.15 (s), 34.98 (s), 31.40 (s). HRMS (ESI-TOF) [M+Na]<sup>+</sup> calculated for [C<sub>15</sub>H<sub>18</sub>O<sub>5</sub>Na]<sup>+</sup> 355.1880, observed 355.1879.

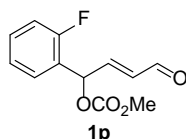

**(E)-1-(2-fluorophenyl)-4-oxobut-2-en-1-yl methyl carbonate** was prepared from 2-bromofluorobenzene, *n*-butyllithium, enal **6** and methyl chloroformate following the same procedure that was used for preparation of enal **1d** (purified by flash column chromatography with 20:1 to 10:1 hexane/EtOAc). <sup>1</sup>H NMR (500 MHz, CDCl<sub>3</sub>) δ 9.59 (d, J = 7.7 Hz, 1H), 7.37 (m, 2H), 7.19 (m, 1H), 7.13 – 7.07 (m, 1H), 6.92 – 6.84 (m, 1H), 6.63 (dd, J = 4.8, 1.6 Hz, 1H), 6.32 (ddd, J = 15.8, 7.7, 1.6 Hz, 1H), 3.82 (s, 3H). <sup>13</sup>C NMR (126 MHz, CDCl<sub>3</sub>) δ 192.63 (s), 159.82 (d, J = 249.2 Hz), 154.51 (s), 150.54 (s), 131.85 (s), 130.99 (d, J = 8.2 Hz), 128.30 (d, J = 3.0 Hz), 124.81 (d, J = 3.6 Hz), 123.65 (d, J = 13.4 Hz), 116.00 (d, J = 21.1 Hz), 71.97 (d, J = 3.1 Hz), 55.34 (s). HRMS (ESI-TOF) [M+Na]<sup>+</sup> calculated for [C<sub>12</sub>H<sub>11</sub>O<sub>4</sub>FNa]<sup>+</sup> 261.0534, observed 261.0532

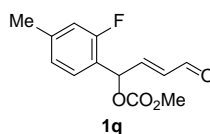

**(E)-1-(2-fluoro-4-methylphenyl)-4-oxobut-2-en-1-yl methyl carbonate** was prepared from 1-bromo-2-fluoro-4-methylbenzene, *n*-butyllithium, enal **6** and methyl chloroformate following the same procedure that was used for preparation of enal **1d** (purified by flash column chromatography with 20:1 to 10:1 hexane/EtOAc). <sup>1</sup>H NMR (500 MHz, CDCl<sub>3</sub>) δ 9.57 (d, J = 7.7 Hz, 1H), 7.24 (m, 1H), 6.98 (d, J = 7.9 Hz, 1H), 6.94 – 6.83 (m, 2H), 6.57 (dd, J = 4.8, 1.6 Hz, 1H), 6.30 (ddd, J = 15.8, 7.7, 1.6 Hz, 1H), 3.80 (s, 3H), 2.34 (s, 3H). <sup>13</sup>C NMR (126 MHz, CDCl<sub>3</sub>) δ 192.73 (s), 159.75 (d, J = 248.9 Hz), 152.72 (d, J = 459.1 Hz), 141.92 (d, J = 8.2 Hz), 131.71 (s), 126.82 (dd, J = 330.6, 3.3 Hz), 120.45 (d, J = 13.9 Hz), 116.48 (d, J = 21.0 Hz), 72.02 (d, J = 2.9 Hz), 55.27 (s), 21.17 (s). HRMS (ESI-TOF) [M+Na]<sup>+</sup> calculated for [C<sub>13</sub>H<sub>13</sub>O<sub>4</sub>FNa]<sup>+</sup> 275.0690, observed 275.0689.

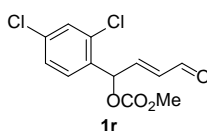

**(E)-1-(2,4-dichlorophenyl)-4-oxobut-2-en-1-yl methyl carbonate** was prepared from 1-bromo-2,4-dichlorobenzene, *n*-butyllithium, enal **6** and methyl chloroformate following the same procedure that was used for preparation of enal **1d** (purified by flash column chromatography with 20:1 to 10:1 hexane/EtOAc). <sup>1</sup>H NMR (500 MHz, CDCl<sub>3</sub>) δ 9.57 (d, J = 7.6 Hz, 1H), 7.40 (m, 2H), 7.30 (dd, J = 8.4, 1.9 Hz, 1H), 6.82 (dd, J = 15.8, 4.7 Hz, 1H), 6.72 – 6.61 (m, 1H), 6.31 (ddd, J =

15.8, 7.6, 1.2 Hz, 1H), 3.82 (s, 3H).  $^{13}\text{C}$  NMR (126 MHz,  $\text{CDCl}_3$ )  $\delta$  192.46 (s), 154.34 (s), 149.52 (s), 135.64 (s), 133.25 (s), 132.91 (s), 132.00 (s), 129.80 (s), 128.93 (s), 128.08 (s), 73.81 (s), 55.47 (s). HRMS (ESI-TOF)  $[\text{M}+\text{Na}]^+$  calculated for  $[\text{C}_{12}\text{H}_{10}\text{O}_4 \text{Cl}_2\text{Na}]^+$  310.9848, observed 310.9849.

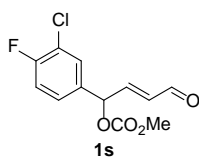

**(E)-1-(3-chloro-4-fluorophenyl)-4-oxobut-2-en-1-yl methyl carbonate** was prepared from 4-bromo-2-chloro-1-fluorobenzene, *n*-butyllithium, enal **6** and methyl chloroformate following the same procedure that was used for preparation of enal **1d** (purified by flash column chromatography with 20:1 to 10:1 hexane/EtOAc).  $^1\text{H}$  NMR (500 MHz,  $\text{CDCl}_3$ )  $\delta$  9.58 (d,  $J = 7.6$  Hz, 1H), 7.42 (dd,  $J = 7.8, 7.3$  Hz, 1H), 7.32 – 7.19 (m, 1H), 7.13 (t,  $J = 8.0$  Hz, 1H), 6.86 (dd,  $J = 15.8, 4.8$  Hz, 1H), 6.60 (d,  $J = 4.8$  Hz, 1H), 6.34 – 6.28 (m, 1H), 3.82 (s, 3H).  $^{13}\text{C}$  NMR (126 MHz,  $\text{CDCl}_3$ )  $\delta$  192.46 (s), 156.36 (s), 154.38 (s), 149.67 (s), 132.11 (s), 131.51 (s), 126.48 (s), 125.45 (d,  $J = 13.3$  Hz), 125.24 (d,  $J = 4.6$  Hz), 121.85 (d,  $J = 17.8$  Hz), 71.79 (d,  $J = 2.8$  Hz), 55.46 (s). HRMS (ESI-TOF)  $[\text{M}+\text{Na}]^+$  calculated for  $[\text{C}_{12}\text{H}_{10}\text{O}_4\text{FCINa}]^+$  295.0144, observed 295.0142.

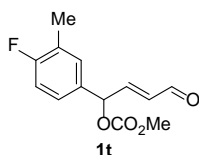

**(E)-1-(4-fluoro-3-methylphenyl)-4-oxobut-2-en-1-yl methyl carbonate** was prepared from 4-bromo-1-fluoro-2-methylbenzene, *n*-butyllithium, enal **6** and methyl chloroformate following the same procedure that was used for preparation of enal **1d** (purified by flash column chromatography with 20:1 to 10:1 hexane/EtOAc).  $^1\text{H}$  NMR (500 MHz,  $\text{CDCl}_3$ )  $\delta$  9.58 (d,  $J = 7.7$  Hz, 1H), 7.17 (m, 2H), 7.01 (t,  $J = 8.8$  Hz, 1H), 6.83 (dd,  $J = 15.7, 4.7$  Hz, 1H), 6.31 (ddd,  $J = 15.7, 7.7, 1.6$  Hz, 1H), 6.26 (dd,  $J = 4.7, 1.6$  Hz, 1H), 3.79 (s, 3H), 2.27 (d,  $J = 1.1$  Hz, 3H).  $^{13}\text{C}$  NMR (126 MHz,  $\text{CDCl}_3$ )  $\delta$  192.65 (s), 162.67 (s), 160.70 (s), 154.63 (s), 151.61 (s), 131.55 (d,  $J = 8.3$  Hz), 130.69 (d,  $J = 5.6$  Hz), 126.63 (d,  $J = 8.5$  Hz), 125.87 (d,  $J = 17.9$  Hz), 115.62 (d,  $J = 22.9$  Hz), 77.26 (s), 5.21 (s), 14.54 (d,  $J = 3.1$  Hz). HRMS (ESI-TOF)  $[\text{M}+\text{Na}]^+$  calculated for  $[\text{C}_{13}\text{H}_{13}\text{O}_4\text{Na}]^+$  275.0690, observed 275.0691.

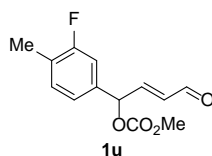

**(E)-1-(3-fluoro-4-methylphenyl)-4-oxobut-2-en-1-yl methyl carbonate** was prepared from 4-bromo-2-fluoro-1-methylbenzene, *n*-butyllithium, enal **6** and methyl chloroformate following the same procedure that was used for preparation of enal **1d** (purified by flash column chromatography with 20:1 to 10:1 hexane/EtOAc).  $^1\text{H}$  NMR (500 MHz,  $\text{CDCl}_3$ )  $\delta$  9.58 (d,  $J = 7.7$  Hz, 1H), 7.20 (m, 1H), 7.07 – 7.00 (m, 1H), 6.83 (dd,  $J = 15.7, 4.8$  Hz, 1H), 6.32 (ddd,  $J = 15.7, 7.7, 1.6$  Hz, 1H), 6.26 (dd,  $J = 4.8, 1.5$  Hz, 1H), 3.80 (s, 1H), 2.26 (d,  $J = 1.8$  Hz, 1H).  $^{13}\text{C}$  NMR (126 MHz,  $\text{CDCl}_3$ )  $\delta$  192.60 (s), 161.37 (d,  $J = 246.6$  Hz), 154.60 (s), 151.21 (s), 135.56 (s), 132.06 (d,  $J = 5.4$  Hz), 131.73

(s), 126.24 (d,  $J = 17.2$  Hz), 122.71 (d,  $J = 3.2$  Hz), 113.97 (d,  $J = 23.6$  Hz), 77.29 (s), 55.25 (s), 14.38 (s). HRMS (ESI-TOF)  $[M+Na]^+$  calculated for  $[C_{13}H_{13}O_4Na]^+$  275.0690, observed 275.0689.

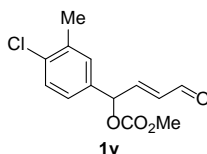

**(E)-1-(4-chloro-3-methylphenyl)-4-oxobut-2-en-1-yl methyl carbonate** was prepared from 4-bromo-1-chloro-2-methylbenzene, *n*-butyllithium, enal **6** and methyl chloroformate following the same procedure that was used for preparation of enal **1d** (purified by flash column chromatography with 20:1 to 10:1 hexane/EtOAc).  $^1H$  NMR (500 MHz,  $CDCl_3$ )  $\delta$  9.58 (dd,  $J = 7.7, 2.2$  Hz, 1H), 7.36 (dd,  $J = 8.2, 1.7$  Hz, 1H), 7.28-7.21 (m, 1H), 7.13 (dd,  $J = 8.2, 1.6$  Hz, 1H), 6.82 (dd,  $J = 15.7, 4.7$  Hz, 1H), 6.32 (ddd,  $J = 15.8, 7.7, 1.3$  Hz, 1H), 6.25 (dd,  $J = 4.7, 1.3$  Hz, 3H), 3.80 (d,  $J = 1.7$  Hz, 1H), 2.38 (s, 3H).  $^{13}C$  NMR (126 MHz,  $CDCl_3$ )  $\delta$  192.59 (s), 154.60 (s), 151.28 (s), 137.07 (s), 135.47 (s), 134.58 (s), 131.66 (s), 129.82 (s), 129.72 (s), 126.05 (s), 77.20 (s), 55.27 (s), 20.10 (s). HRMS (ESI-TOF)  $[M+Na]^+$  calculated for  $[C_{13}H_{13}O_4ClNa]^+$  291.0395, observed 275.0696.

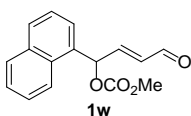

**(E)-methyl (1-(naphthalen-1-yl)-4-oxobut-2-en-1-yl) carbonate** was prepared from 1-bromonaphthalene, *n*-butyllithium, enal **6** and methyl chloroformate following the same procedure that was used for preparation of enal **1d** (purified by flash column chromatography with 20:1 to 10:1 hexane/EtOAc).  $^1H$  NMR (400 MHz,  $CDCl_3$ )  $\delta$  9.60 (s, 1H), 8.04-7.84 (m, 4H), 7.71-7.51 (m, 2H), 7.45 (dd,  $J = 8.4, 1.8$  Hz, 1H), 6.94 (dd,  $J = 15.8, 4.7$  Hz, 1H), 6.49 (dd,  $J = 4.7, 1.6$  Hz, 1H), 6.40 (ddd,  $J = 15.8, 7.7, 1.6$  Hz, 1H), 3.81 (s, 3H).  $^{13}C$  NMR (101 MHz,  $CDCl_3$ )  $\delta$  192.67 (s), 154.65 (s), 151.67 (s), 133.46 (s), 133.21 (s), 133.05 (s), 131.59 (s), 129.05 (s), 128.10 (s), 127.72 (s), 126.97 (s), 126.86 (s), 126.67 (s), 124.27 (s), 77.95 (s), 55.18 (s). HRMS (ESI-TOF)  $[M+Na]^+$  calculated for  $[C_{16}H_{14}O_4Na]^+$  293.0784, observed 293.0784.

### Synthesis of the chiral (*Z*)-allylic fluorides

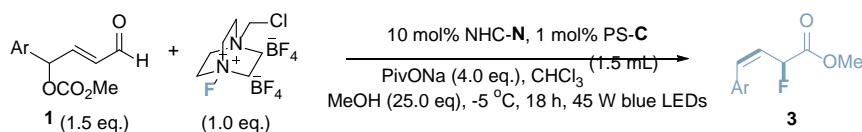

General procedure: NHC-N (10 mol%), PS-C ( $[Ir(dF\text{-ppy})_2(bpy)]PF_6$ , 1 mol%), Selectfluor (0.1 mmol) and PivONa (0.4 mmol) were weighed into a 10 mL vial successively. Mixed solvent ( $CHCl_3/MeOH$  (1.5 mL/0.1 mL)) was added, followed by the addition of enal **1** (0.15 mmol). The reaction flask was sealed with a rubber septum, degassed and back-filled with argon (3x). The resulting mixture was stirred and irradiated with 45 W blue LEDs at  $-5$  °C for 18h. Upon complete consumption of the enal, the reaction was filtered through a plug of silica gel and concentrated under reduced pressure. The residue was purified by flash column chromatography (50:1 hexane/EtOAc) to afford the desired product **3**. The ee value was determined by chiral GC. The (*Z*/*E*) ratio was determined by GC.

The racemic products was obtained using racemic NHC-A with the same procedure as asymmetric one.

### Characterization of the chiral (*Z*)-allylic fluorides

#### *methyl (S,Z)-2-fluoro-4-phenylbut-3-enoate*

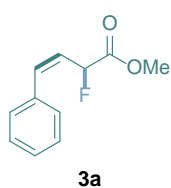

Colorless oil, 15.7 mg, yield : 81%. ee: 98%, determined by chiral GC. *Z/E* = 9:1, determined by GC.  $^1\text{H NMR}$  (400 MHz,  $\text{CDCl}_3$ )  $\delta$  7.57-7.27 (m, 5H), 6.98 (dd,  $J$  = 11.3, 3.6 Hz, 1H), 5.82 (dt,  $J$  = 11.3, 9.9 Hz, 1H), 5.75 – 5.54 (m, 1H), 3.83 (s, 3H).  $^{13}\text{C NMR}$  (101 MHz,  $\text{CDCl}_3$ )  $\delta$  169.46 (d,  $J$  = 26.5 Hz), 138.41 (d,  $J$  = 10.6 Hz), 135.05 (s), 128.99 (d,  $J$  = 2.7 Hz), 128.67 (s), 128.55 (s), 122.98 (d,  $J$  = 20.2 Hz), 84.50 (d,  $J$  = 177.5 Hz), 52.84 (s).  $^{19}\text{F NMR}$  (376 MHz,  $\text{CDCl}_3$ )  $\delta$  -174.72 (s); HRMS (ESI-TOF)  $[\text{M}+\text{Na}]^+$  calculated for  $[\text{C}_{11}\text{H}_{11}\text{O}_2\text{FNa}]^+$  217.0635, observed 217.0635. GC (Astec CHIRALDEX<sup>TM</sup>  $\beta$ -DM column(cat# 77023 AST; serial# 58478-03B), 110 °C isotherm, hold time: 50 min):  $t_{\text{major}}$  = 34.689 min;  $t_{\text{minor}}$  = 31.936 min.  $[\alpha]_{\text{D}}^{25}$  = 159.4 ( $c$  = 1.0,  $\text{CHCl}_3$ ).

#### *methyl (S,Z)-2-fluoro-4-(4-fluorophenyl)but-3-enoate*

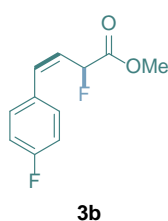

Colorless oil, 14.8 mg, yield : 70%. ee: 97%, determined by chiral GC. *Z/E* = 10:1, determined by GC.  $^1\text{H NMR}$  (400 MHz,  $\text{CDCl}_3$ )  $\delta$  7.48-7.29 (m, 2H), 7.06 (t,  $J$  = 8.6 Hz, 2H), 6.92 (dd,  $J$  = 11.3, 3.4 Hz, 1H), 5.80 (dd,  $J$  = 20.9, 10.1 Hz, 1H), 5.59 (dd,  $J$  = 47.8, 9.6 Hz, 1H), 3.83 (s, 3H).  $^{13}\text{C NMR}$  (101 MHz,  $\text{CDCl}_3$ )  $\delta$  169.34 (d,  $J$  = 26.7 Hz), 162.88 (d,  $J$  = 248.7 Hz), 137.21 (d,  $J$  = 10.4 Hz), 130.84 (dd,  $J$  = 8.2, 2.7 Hz), 122.99 (d,  $J$  = 20.4 Hz), 115.71 (d,  $J$  = 21.6 Hz), 84.37 (d,  $J$  = 178.1 Hz), 52.89 (s).  $^{19}\text{F NMR}$  (376 MHz,  $\text{CDCl}_3$ )  $\delta$  -112.76 (s), -174.86 (s). HRMS (ESI-TOF)  $[\text{M}+\text{Na}]^+$  calculated for  $[\text{C}_{11}\text{H}_{10}\text{O}_2\text{F}_2\text{Na}]^+$  235.0541, observed 235.0539. GC (Astec CHIRALDEX<sup>TM</sup>  $\beta$ -DM column(cat# 77023 AST; serial# 58478-03B), 110 °C isotherm, hold time: 50 min):  $t_{\text{major}}$  = 36.840 min;  $t_{\text{minor}}$  = 34.874 min.  $[\alpha]_{\text{D}}^{25}$  = 108.7 ( $c$  = 1.0,  $\text{CHCl}_3$ ).

#### *methyl (S,Z)-4-(4-chlorophenyl)-2-fluorobut-3-enoate*

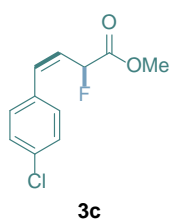

Colorless oil, 16.2 mg, yield : 71%. ee: 92%, determined by chiral GC. *Z/E* = 6:1, determined by GC.  $^1\text{H NMR}$  (400 MHz,  $\text{CDCl}_3$ )  $\delta$  7.45 – 7.25 (m, 4H), 6.92 (dd,  $J$  = 11.4, 3.5 Hz, 1H), 5.84 (dt,  $J$  = 11.4, 9.9 Hz, 1H), 5.59 (ddd,  $J$  = 47.8, 9.6, 0.8 Hz, 1H), 3.84 (s, 3H).  $^{13}\text{C NMR}$  (101 MHz,  $\text{CDCl}_3$ )  $\delta$  169.01 (d,  $J$  = 26.3 Hz), 136.83 (d,  $J$  = 10.4 Hz), 134.44 (s), 133.21 (d,  $J$  = 3.1 Hz), 130.11 (d,  $J$  = 2.8 Hz), 128.70 (s), 123.43 (d,  $J$  = 20.4 Hz), 84.11 (d,  $J$  = 178.4 Hz), 52.71 (s).  $^{19}\text{F NMR}$  (376 MHz,  $\text{CDCl}_3$ )  $\delta$  -175.14 (s). HRMS (ESI-TOF)  $[\text{M}+\text{Na}]^+$  calculated for  $[\text{C}_{11}\text{H}_{10}\text{O}_2\text{FCINa}]^+$  251.0246, observed 251.0245. GC (Astec CHIRALDEX<sup>TM</sup>  $\beta$ -DM column(cat# 77023 AST; serial# 58478-03B), 130 °C isotherm, hold time: 50 min):  $t_{\text{major}}$  = 38.335 min;  $t_{\text{minor}}$  = 37.237 min.  $[\alpha]_{\text{D}}^{25}$  = 105.5 ( $c$  = 1.0,  $\text{CHCl}_3$ ).

#### *methyl (S,Z)-2-fluoro-4-(4-(trifluoromethoxy)phenyl)but-3-enoate*

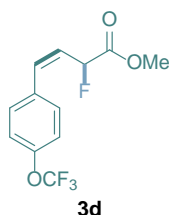

Colorless oil, 17.0 mg, yield : 61%. ee: 94%, determined by chiral GC. *Z/E* = 9:1, determined by GC.  $^1\text{H NMR}$  (400 MHz,  $\text{CDCl}_3$ )  $\delta$  7.42 (d,  $J$  = 8.6 Hz, 2H), 7.29 – 7.13 (m, 2H), 6.94 (dd,  $J$  = 11.4, 3.5 Hz, 1H), 5.99 – 5.76 (m, 1H), 5.58 (dd,  $J$  = 47.8, 9.6 Hz, 1H), 3.84 (s, 3H).  $^{13}\text{C NMR}$  (101 MHz,  $\text{CDCl}_3$ )  $\delta$  169.19 (d,  $J$  = 26.3 Hz), 149.33 (s), 136.78 (d,  $J$  = 10.4 Hz), 133.64 (s), 130.52 (d,  $J$  = 2.7 Hz), 123.90 (d,

$J = 20.5$  Hz), 121.07 (s), 120.55 (d,  $J = 257.6$  Hz), 84.29 (d,  $J = 178.6$  Hz), 52.94 (s).  $^{19}\text{F}$  NMR (376 MHz,  $\text{CDCl}_3$ )  $\delta$  -57.82 (s), -175.33 (s). HRMS (ESI-TOF)  $[\text{M}+\text{Na}]^+$  calculated for  $[\text{C}_{12}\text{H}_{10}\text{O}_3\text{F}_4\text{Na}]^+$  301.0458, observed 301.0458. GC (Astec CHIRALDEX<sup>TM</sup>  $\beta$ -DM column(cat# 77023 AST; serial# 58478-03B), 105 °C isotherm, hold time: 60 min):  $t_{\text{major}} = 48.790$  min;  $t_{\text{minor}} = 46.418$  min.  $[\alpha]_{\text{D}}^{25} = 112.8$  ( $c = 1.0$ ,  $\text{CHCl}_3$ ).

*methyl (S,Z)-2-fluoro-4-(p-tolyl)but-3-enoate*

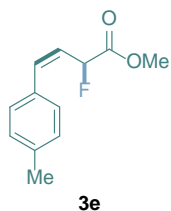

Colorless oil, 12.1 mg, yield : 58%. ee: 98%, determined by chiral GC.  $Z/E = 6:1$ , determined by GC.  $^1\text{H}$  NMR (400 MHz,  $\text{CDCl}_3$ )  $\delta$  7.29 (d,  $J = 8.0$  Hz, 2H), 7.19 (d,  $J = 7.9$  Hz, 2H), 6.94 (dd,  $J = 11.0, 3.6$  Hz, 1H), 5.84 – 5.39 (m, 2H), 3.83 (s, 3H), 2.36 (s, 3H).  $^{13}\text{C}$  NMR (101 MHz,  $\text{CDCl}_3$ )  $\delta$  169.57 (d,  $J = 26.6$  Hz), 138.58 (s), 138.40 (d,  $J = 10.5$  Hz), 132.22 (s), 129.39 (s), 128.99 (d,  $J = 2.7$  Hz), 122.26 (d,  $J = 20.1$  Hz), 84.58 (d,  $J = 177.4$  Hz), 52.81 (s), 21.37 (s).  $^{19}\text{F}$  NMR (376 MHz,  $\text{CDCl}_3$ )  $\delta$  -174.25 (s). HRMS (ESI-TOF)  $[\text{M}+\text{Na}]^+$  calculated for  $[\text{C}_{12}\text{H}_{13}\text{O}_2\text{FNa}]^+$  231.0792, observed 231.0799. GC (Astec CHIRALDEX<sup>TM</sup>  $\beta$ -DM column(cat# 77023 AST; serial# 58478-03B), 120 °C isotherm, hold time: 50 min):  $t_{\text{major}} = 37.374$  min;  $t_{\text{minor}} = 34.940$  min.  $[\alpha]_{\text{D}}^{25} = 66.6$  ( $c = 1.0$ ,  $\text{CHCl}_3$ ).

*methyl (S,Z)-4-(4-butylphenyl)-2-fluorobut-3-enoate*

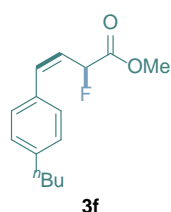

Colorless oil, 12.5 mg, yield : 50%. ee: 94%, determined by chiral GC.  $Z/E = 5:1$ , determined by GC.  $^1\text{H}$  NMR (400 MHz,  $\text{CDCl}_3$ )  $\delta$  7.31 (d,  $J = 8.0$  Hz, 2H), 7.20 (d,  $J = 8.1$  Hz, 2H), 6.96 (dd,  $J = 10.7, 3.7$  Hz, 1H), 5.95-5.51 (m, 2H), 3.84 (s, 3H), 2.83-2.53 (m, 2H), 1.82-1.51 (m, 3H), 1.43-1.25 (m, 2H), 0.93 (t,  $J = 7.3$  Hz, 3H).  $^{13}\text{C}$  NMR (100 MHz,  $\text{CDCl}_3$ )  $\delta$  169.37 (d,  $J = 26.7$  Hz), 143.40 (s), 138.23 (d,  $J = 10.5$  Hz), 132.17 (s), 128.78 (d,  $J = 2.7$  Hz), 128.53 (s), 121.99 (d,  $J = 20.0$  Hz), 84.39 (d,  $J = 177.3$  Hz), 52.60 (s), 35.31 (s), 33.40 (s), 22.25 (s), 13.84 (s).  $^{19}\text{F}$  NMR (376 MHz,  $\text{CDCl}_3$ )  $\delta$  -174.19 (s). HRMS (ESI-TOF)  $[\text{M}+\text{Na}]^+$  calculated for  $[\text{C}_{15}\text{H}_{19}\text{O}_2\text{FNa}]^+$  273.1261, observed 273.1261. GC (Astec CHIRALDEX<sup>TM</sup>  $\beta$ -DM column(cat# 77023 AST; serial# 58478-03B), 150 °C isotherm, hold time: 50 min):  $t_{\text{major}} = 37.956$  min;  $t_{\text{minor}} = 36.651$  min.  $[\alpha]_{\text{D}}^{25} = 199.8$  ( $c = 1.0$ ,  $\text{CHCl}_3$ ).

*methyl (S,Z)-4-(4-(tert-butyl)phenyl)-2-fluorobut-3-enoate*

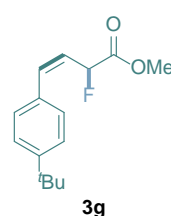

Colorless oil, 18.8 mg, yield : 75%. ee: 95%, determined by chiral GC.  $Z/E = 6:1$ , determined by GC.  $^1\text{H}$  NMR (400 MHz,  $\text{CDCl}_3$ )  $\delta$  7.45-7.40 (m, 2H), 7.34 (d,  $J = 8.3$  Hz, 2H), 6.96 (dd,  $J = 10.5, 3.7$  Hz, 1H), 5.89-5.44 (m, 2H), 3.84 (s, 3H), 1.33 (s, 9H).  $^{13}\text{C}$  NMR (100 MHz,  $\text{CDCl}_3$ )  $\delta$  169.35 (d,  $J = 26.7$  Hz), 151.56 (s), 138.07 (d,  $J = 10.4$  Hz), 132.02 (s), 128.64 (d,  $J = 2.7$  Hz), 125.41 (s), 122.14 (d,  $J = 20.3$  Hz), 84.40 (d,  $J = 177.3$  Hz), 52.58 (s), 34.59 (s), 31.15 (s).  $^{19}\text{F}$  NMR (376 MHz,  $\text{CDCl}_3$ )  $\delta$  -174.21 (s). HRMS (ESI-TOF)  $[\text{M}+\text{Na}]^+$  calculated for  $[\text{C}_{15}\text{H}_{19}\text{O}_2\text{FNa}]^+$  273.1261, observed 273.1261. GC (Astec CHIRALDEX<sup>TM</sup>  $\beta$ -DM column(cat# 77023 AST; serial# 58478-03B), 145 °C isotherm, hold time: 50 min):  $t_{\text{major}} = 35.246$  min;  $t_{\text{minor}} = 33.961$  min.  $[\alpha]_{\text{D}}^{25} = 147.2$  ( $c = 1.0$ ,  $\text{CHCl}_3$ ).

*methyl (S,Z)-2-fluoro-4-(m-tolyl)but-3-enoate*



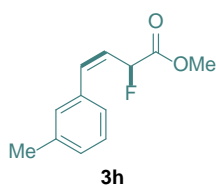

Colorless oil, 17.5 mg, yield : 84%. ee: 95%, determined by chiral GC. *Z/E* = 9:1, determined by GC. <sup>1</sup>H NMR (400 MHz, CDCl<sub>3</sub>) δ 7.36-7.25 (m, 1H), 7.20-7.12 (m, 3H), 6.95 (dd, *J* = 11.2, 3.6 Hz, 1H), 5.98-5.42 (m, 2H), 3.83 (s, 3H), 2.36 (s, 3H). <sup>13</sup>C NMR (100 MHz, CDCl<sub>3</sub>) δ 169.52 (d, *J* = 26.6 Hz), 138.61 (d, *J* = 10.5 Hz), 138.34 (s), 135.00 (s), 129.68 (d, *J* = 2.6 Hz), 129.32 (s), 128.57 (s), 126.06 (d, *J* = 2.7 Hz), 122.76 (d, *J* = 20.1 Hz), 84.56 (d, *J* = 177.3 Hz), 52.81 (s), 21.53 (s). <sup>19</sup>F NMR (376 MHz, CDCl<sub>3</sub>) δ -174.62 (s). HRMS (ESI-TOF) [M+Na]<sup>+</sup> calculated for [C<sub>12</sub>H<sub>13</sub>O<sub>2</sub>FNa]<sup>+</sup> 231.0792, observed 231.0789. GC (Astec CHIRALDEX<sup>TM</sup> β-DM column(cat# 77023 AST; serial# 58478-03B), 120 °C isotherm, hold time: 50 min): *t*<sub>major</sub> = 32.632 min; *t*<sub>minor</sub> = 30.694 min. [α]<sup>25</sup><sub>D</sub> = 169.7 (c = 1.0, CHCl<sub>3</sub>).

*methyl (S,Z)-2-fluoro-4-(3-isopropylphenyl)but-3-enoate*

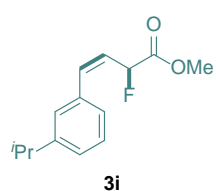

Colorless oil, 19.8 mg, yield : 84%. ee: 95%, determined by chiral GC. *Z/E* = 9:1, determined by GC. <sup>1</sup>H NMR (400 MHz, CDCl<sub>3</sub>) δ 7.38-7.27 (m, 1H), 7.24 (s, 1H), 7.24-7.14 (m, 2H), 6.98 (dd, *J* = 11.2, 3.6 Hz, 1H), 5.80 (dd, *J* = 21.1, 10.1 Hz, 1H), 5.66 (dd, *J* = 47.3, 9.8 Hz, 1H), 3.84 (s, 3H), 2.92 (dt, *J* = 13.8, 6.9 Hz, 1H), 1.26 (d, *J* = 6.9 Hz, 6H). <sup>13</sup>C NMR (101 MHz, CDCl<sub>3</sub>) δ 169.54 (d, *J* = 26.4 Hz), 149.34 (s), 138.76 (d, *J* = 10.6 Hz), 135.03 (s), 128.62 (s), 127.15 (d, *J* = 2.7 Hz), 126.85 (s), 126.44 (d, *J* = 2.7 Hz), 122.69 (d, *J* = 20.3 Hz), 84.65 (d, *J* = 177.2 Hz), 52.83 (s), 34.16 (s), 24.04 (s). <sup>19</sup>F NMR (376 MHz, CDCl<sub>3</sub>) δ -174.25 (s). HRMS (ESI-TOF) [M+Na]<sup>+</sup> calculated for [C<sub>14</sub>H<sub>17</sub>O<sub>2</sub>FNa]<sup>+</sup> 259.1105, observed 259.1108. GC (Astec CHIRALDEX<sup>TM</sup> β-DM column(cat# 77023 AST; serial# 58478-03B), 130 °C isotherm, hold time: 50 min): *t*<sub>major</sub> = 39.116 min; *t*<sub>minor</sub> = 37.509 min. [α]<sup>25</sup><sub>D</sub> = 145.3 (c = 1.0, CHCl<sub>3</sub>).

*methyl (S,Z)-4-(3-(tert-butyl)phenyl)-2-fluorobut-3-enoate*

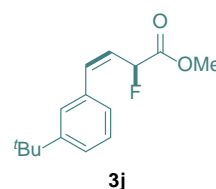

Colorless oil, 12.3 mg, yield : 52%. ee: 97%, determined by chiral GC. *Z/E* = 8:1, determined by GC. <sup>1</sup>H NMR (400 MHz, CDCl<sub>3</sub>) δ 7.44 (s, 1H), 7.41-7.29 (m, 2H), 7.20 (d, *J* = 7.4 Hz, 1H), 7.01 (dd, *J* = 11.2, 3.6 Hz, 1H), 5.89-5.40 (m, 2H), 3.86 (s, 3H), 1.34 (s, 9H). <sup>13</sup>C NMR (100 MHz, CDCl<sub>3</sub>) δ 169.33 (d, *J* = 26.7 Hz), 151.43 (s), 138.69 (d, *J* = 10.5 Hz), 134.49 (s), 128.18 (s), 126.02 (d, *J* = 2.7 Hz), 125.88 (d, *J* = 2.7 Hz), 125.39 (s), 122.43 (d, *J* = 20.5 Hz), 84.47 (d, *J* = 177.2 Hz), 52.62 (s), 34.63 (s), 31.18 (s). <sup>19</sup>F NMR (376 MHz, CDCl<sub>3</sub>) δ -174.14 (s). HRMS (ESI-TOF) [M+Na]<sup>+</sup> calculated for [C<sub>15</sub>H<sub>19</sub>O<sub>2</sub>FNa]<sup>+</sup> 273.1261, observed 273.1261. GC (Astec CHIRALDEX<sup>TM</sup> β-DM column(cat# 77023 AST; serial# 58478-03B), 135 °C isotherm, hold time: 50 min): *t*<sub>major</sub> = 39.322min; *t*<sub>minor</sub> = 37.596 min. [α]<sup>25</sup><sub>D</sub> = 164.4 (c = 1.0, CHCl<sub>3</sub>). [α]<sup>25</sup><sub>D</sub> = 149.5 (c = 1.0, CHCl<sub>3</sub>).

*methyl (S,Z)-4-(3-chlorophenyl)-2-fluorobut-3-enoate*

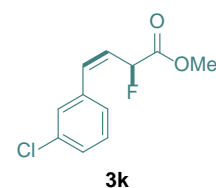

Colorless oil, 14.3 mg, yield : 63%. ee: 94%, determined by chiral GC. *Z/E* = 7:1, determined by GC. <sup>1</sup>H NMR (400 MHz, CDCl<sub>3</sub>) δ 7.39 (s, 1H), 7.37-7.27 (m, 3H), 6.91 (dd, *J* = 11.4, 3.4 Hz, 1H), 5.87 (dt, *J* = 11.3, 9.9 Hz, 1H), 5.60 (ddd, *J* = 47.8, 9.6, 0.7 Hz, 1H), 3.85 (s, 3H). <sup>13</sup>C NMR (100 MHz, CDCl<sub>3</sub>) δ 168.94 (d, *J* = 26.3 Hz), 136.62 (s), 136.52 (s), 134.44 (s), 129.74 (s), 128.76 (d, *J* = 2.8 Hz), 128.44 (s), 126.90 (d, *J* = 2.7 Hz), 124.08 (d, *J* =

20.5 Hz), 84.05 (d,  $J = 178.4$  Hz), 52.73 (s).  $^{19}\text{F}$  NMR (376 MHz,  $\text{CDCl}_3$ )  $\delta$  -176.61 (s). HRMS (ESI-TOF)  $[\text{M}+\text{Na}]^+$  calculated for  $[\text{C}_{11}\text{H}_{10}\text{O}_2\text{FCiNa}]^+$  251.0246, observed 251.0247. GC (Astec CHIRALDEX<sup>TM</sup>  $\beta$ -DM column(cat# 77023 AST; serial# 58478-03B), 130 °C isotherm, hold time: 50 min):  $t_{\text{major}} = 33.258$ min;  $t_{\text{minor}} = 31.450$  min.  $[\alpha]_{\text{D}}^{25} = 133.9$  (c = 1.0,  $\text{CHCl}_3$ ).

*methyl (S,Z)-2-fluoro-4-(3-methoxyphenyl)but-3-enoate*

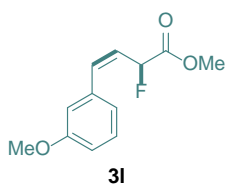

Colorless oil, 16.3 mg, yield : 75%. ee: 93%, determined by chiral GC.  $Z/E = 8:1$ , determined by GC.  $^1\text{H}$  NMR (400 MHz,  $\text{CDCl}_3$ )  $\delta$  7.29 (t,  $J = 8.0$  Hz, 1H), 7.01-6.91 (m, 3H), 6.88 (dd,  $J = 7.5, 2.0$  Hz, 1H), 5.80 (dd,  $J = 21.1, 10.3$  Hz, 1H), 5.68 (dd,  $J = 47.4, 9.7$  Hz, 1H), 3.83 (s, 3H), 3.81 (s, 3H).  $^{13}\text{C}$  NMR (101 MHz,  $\text{CDCl}_3$ )  $\delta$  169.45 (d,  $J = 26.4$  Hz), 159.77 (s), 138.24 (d,  $J = 10.6$  Hz), 136.33 (s), 129.70 (s), 123.20 (d,  $J = 20.4$  Hz), 121.41 (d,  $J = 2.7$  Hz), 114.42 (s), 114.31 (d,  $J = 2.8$  Hz), 84.58 (d,  $J = 177.6$  Hz), 55.39 (s), 52.85 (s).  $^{19}\text{F}$  NMR (376 MHz,  $\text{CDCl}_3$ )  $\delta$  -174.87 (s). HRMS (ESI-TOF)  $[\text{M}+\text{Na}]^+$  calculated for  $[\text{C}_{12}\text{H}_{13}\text{O}_3\text{FNa}]^+$  247.0741, observed 247.0742. GC (Astec CHIRALDEX<sup>TM</sup>  $\beta$ -DM column(cat# 77023 AST; serial# 58478-03B), 135 °C isotherm, hold time: 50 min):  $t_{\text{major}} = 34.960$ min;  $t_{\text{minor}} = 32.344$  min.  $[\alpha]_{\text{D}}^{25} = 101.5$  (c = 1.0,  $\text{CHCl}_3$ ).

*methyl (S,Z)-2-fluoro-4-(3-isopropoxyphenyl)but-3-enoate*

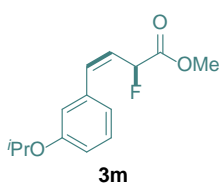

Colorless oil, 16.3 mg, yield : 73%. ee: 95%, determined by chiral GC.  $Z/E = 7:1$ , determined by GC.  $^1\text{H}$  NMR (400 MHz,  $\text{CDCl}_3$ )  $\delta$  7.33-7.19 (m, 1H), 6.95-6.92 (m, 3H), 6.86 (dd,  $J = 8.0, 1.5$  Hz, 1H), 5.94-5.53 (m, 2H), 4.55 (dt,  $J = 12.1, 6.0$  Hz, 1H), 3.83 (s, 3H), 1.34 (s, 3H), 1.32 (s, 3H).  $^{13}\text{C}$  NMR (101 MHz,  $\text{CDCl}_3$ )  $\delta$  169.48 (d,  $J = 26.5$  Hz), 158.11 (s), 138.41 (d,  $J = 10.5$  Hz), 136.34 (s), 129.72 (s), 122.98 (d,  $J = 20.3$  Hz), 121.21 (d,  $J = 2.7$  Hz), 116.33 (s), 116.10 (s), 84.57 (d,  $J = 177.6$  Hz), 70.10 (s), 52.84 (s), 22.16 (s).  $^{19}\text{F}$  NMR (376 MHz,  $\text{CDCl}_3$ )  $\delta$  -174.72 (s). HRMS (ESI-TOF)  $[\text{M}+\text{Na}]^+$  calculated for  $[\text{C}_{14}\text{H}_{17}\text{O}_3\text{FNa}]^+$  247.0741, observed 247.0747. GC (Astec CHIRALDEX<sup>TM</sup>  $\beta$ -DM column(cat# 77023 AST; serial# 58478-03B), 140 °C isotherm, hold time: 50 min):  $t_{\text{major}} = 37.935$  min;  $t_{\text{minor}} = 35.719$  min.  $[\alpha]_{\text{D}}^{25} = 147.4$  (c = 1.0,  $\text{CHCl}_3$ ).

*methyl (S,Z)-4-(3,5-dimethylphenyl)-2-fluorobut-3-enoate*

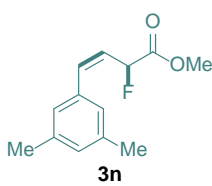

Colorless oil, 17.5 mg, yield : 79%. ee: 94%, determined by chiral GC.  $Z/E = 7:1$ , determined by GC.  $^1\text{H}$  NMR (400 MHz,  $\text{CDCl}_3$ )  $\delta$  7.02-7.00 (m, 3H), 6.94 (dd,  $J = 11.1, 3.7$  Hz, 1H), 5.89-5.52 (m, 2H), 3.85 (s, 3H), 2.35 (s, 6H).  $^{13}\text{C}$  NMR (101 MHz,  $\text{CDCl}_3$ )  $\delta$  169.55 (d,  $J = 26.4$  Hz), 138.78 (d,  $J = 10.4$  Hz), 138.22 (s), 134.95 (s), 130.21 (s), 126.78 (d,  $J = 2.7$  Hz), 122.58 (d,  $J = 19.8$  Hz), 84.62 (d,  $J = 177.2$  Hz), 52.75 (s), 21.40 (s).  $^{19}\text{F}$  NMR (376 MHz,  $\text{CDCl}_3$ )  $\delta$  -174.34 (s). HRMS (ESI-TOF)  $[\text{M}+\text{Na}]^+$  calculated for  $[\text{C}_{13}\text{H}_{15}\text{O}_2\text{FNa}]^+$  245.0948, observed 245.0945. GC (Astec CHIRALDEX<sup>TM</sup>  $\beta$ -DM column(cat# 77023 AST; serial# 58478-03B), 130 °C isotherm, hold time: 50 min):  $t_{\text{major}} = 29.467$  min;  $t_{\text{minor}} = 27.635$  min.  $[\alpha]_{\text{D}}^{25} = 70.0$  (c = 1.0,  $\text{CHCl}_3$ ).

*methyl (S,Z)-4-(3,5-di-tert-butylphenyl)-2-fluorobut-3-enoate*

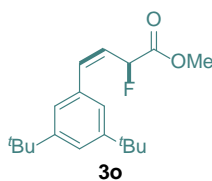

Colorless oil, 24.2 mg, yield : 79%. ee: 96%, determined by chiral GC. *Z/E* = 7:1, determined by GC. <sup>1</sup>H NMR (400 MHz, CDCl<sub>3</sub>) δ 7.44 (t, *J* = 1.6 Hz, 1H), 7.28 (d, *J* = 1.6 Hz, 2H), 7.03 (dd, *J* = 10.9, 3.6 Hz, 1H), 6.00-5.48 (m, 2H), 3.88 (s, 3H), 1.36 (s, 18H). <sup>13</sup>C NMR (101 MHz, CDCl<sub>3</sub>) δ 169.57 (d, *J* = 26.8 Hz), 151.16 (s), 139.34 (d, *J* = 10.6 Hz), 134.32 (d, *J* = 3.0 Hz), 123.40 (d, *J* = 2.6 Hz), 122.66 (s), 122.34 (d, *J* = 20.8 Hz), 84.87 (d, *J* = 176.9 Hz), 52.76 (s), 34.99 (s), 31.52 (s). <sup>19</sup>F NMR (376 MHz, CDCl<sub>3</sub>) δ -173.64 (s). HRMS (ESI-TOF) [M+Na]<sup>+</sup> calculated for [C<sub>19</sub>H<sub>27</sub>O<sub>2</sub>FNa]<sup>+</sup> 329.1887, observed 329.1888. GC (Astec CHIRALDEX™ β-DM column(cat# 77023 AST; serial# 58478-03B), 155 °C isotherm, hold time: 50 min): *t*<sub>major</sub> = 34.624 min; *t*<sub>minor</sub> = 32.882 min. [α]<sub>D</sub><sup>25</sup> = 121.7 (c = 1.0, CHCl<sub>3</sub>).

*methyl (S,Z)-2-fluoro-4-(2-fluorophenyl)but-3-enoate*

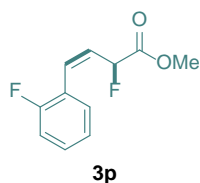

Colorless oil, 11.0 mg, yield : 52%. ee: 95%, determined by chiral GC. *Z/E* = 9:1, determined by GC. <sup>1</sup>H NMR (400 MHz, CDCl<sub>3</sub>) δ 7.47 (td, *J* = 7.6, 1.3 Hz, 1H), 7.35 (tdd, *J* = 7.3, 5.4, 1.7 Hz, 1H), 7.17 (t, *J* = 7.3 Hz, 1H), 7.10 (t, *J* = 8.8 Hz, 1H), 7.03 (d, *J* = 12.1 Hz, 1H), 5.94 (dt, *J* = 11.4, 9.7 Hz, 1H), 5.59 (dd, *J* = 47.8, 9.7 Hz, 1H), 3.85 (s, 3H). <sup>13</sup>C NMR (101 MHz, CDCl<sub>3</sub>) δ 169.15 (d, *J* = 26.1 Hz), 131.20 (dd, *J* = 10.4, 4.1 Hz), 130.84 (s), 130.81 (s), 130.78 (s), 130.57 (d, *J* = 8.5 Hz), 124.83 (d, *J* = 20.2 Hz), 124.23 (d, *J* = 3.8 Hz), 115.71 (d, *J* = 21.4 Hz), 84.64 (d, *J* = 178.2 Hz), 52.88 (s). <sup>19</sup>F NMR (376 MHz, CDCl<sub>3</sub>) δ -114.28 (s), -176.35 (s). HRMS (ESI-TOF) [M+Na]<sup>+</sup> calculated for [C<sub>11</sub>H<sub>10</sub>O<sub>2</sub>F<sub>2</sub>Na]<sup>+</sup> 235.0541, observed 235.0540. GC (Astec CHIRALDEX™ β-DM column(cat# 77023 AST; serial# 58478-03B), 110 °C isotherm, hold time: 50 min): *t*<sub>major</sub> = 31.556 min; *t*<sub>minor</sub> = 28.600 min. [α]<sub>D</sub><sup>25</sup> = 59.3 (c = 1.0, CHCl<sub>3</sub>).

*methyl (S,Z)-2-fluoro-4-(2-fluoro-4-methylphenyl)but-3-enoate*

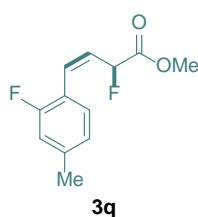

Colorless oil, 15.4 mg, yield : 68%. ee: 94%, determined by chiral GC. *Z/E* = 9:1, determined by GC. <sup>1</sup>H NMR (400 MHz, CDCl<sub>3</sub>) δ 7.42 – 7.29 (m, 1H), 7.13 – 6.96 (m, 2H), 6.91 (d, *J* = 11.0 Hz, 1H), 5.88 (dt, *J* = 11.3, 9.7 Hz, 1H), 5.59 (dd, *J* = 47.8, 9.6 Hz, 1H), 3.83 (s, 3H), 2.36 (s, 3H). <sup>13</sup>C NMR (101 MHz, CDCl<sub>3</sub>) δ 169.06 (d, *J* = 26.3 Hz), 160.08 (d, *J* = 251.5 Hz), 141.23 (d, *J* = 7.9 Hz), 131.05 (dd, *J* = 10.5, 4.0 Hz), 130.21 (d, *J* = 3.0 Hz), 124.73 (d, *J* = 3.2 Hz), 123.87 (d, *J* = 20.2 Hz), 119.67 (dd, *J* = 14.3, 3.2 Hz), 116.05 (d, *J* = 21.3 Hz), 84.49 (d, *J* = 177.9 Hz), 52.65 (s), 21.12 (s). <sup>19</sup>F NMR (376 MHz, CDCl<sub>3</sub>) δ -115.38 (s), -175.87 (s). HRMS (ESI-TOF) [M+Na]<sup>+</sup> calculated for [C<sub>12</sub>H<sub>12</sub>O<sub>2</sub>F<sub>2</sub>Na]<sup>+</sup> 249.0698, observed 249.0698. GC (Astec CHIRALDEX™ β-DM column(cat# 77023 AST; serial# 58478-03B), 120 °C isotherm, hold time: 50 min): *t*<sub>major</sub> = 34.498 min; *t*<sub>minor</sub> = 31.909 min. [α]<sub>D</sub><sup>25</sup> = 151.2 (c = 1.0, CHCl<sub>3</sub>).

*methyl (S,Z)-4-(2,4-dichlorophenyl)-2-fluorobut-3-enoate*

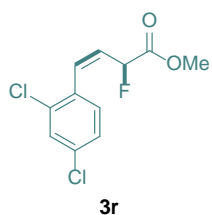

Colorless oil, 18.0 mg, yield : 69%. ee: 88%, determined by chiral GC. *Z/E* = 9:1, determined by GC. <sup>1</sup>H NMR (400 MHz, CDCl<sub>3</sub>) δ 7.47-7.39 (m, 2H), 7.34-7.14 (m, 1H), 6.97 (dd, *J* = 11.4, 3.3 Hz, 1H), 5.94 (dt, *J* = 11.4, 9.6 Hz, 1H), 5.43 (ddd, *J* = 47.8, 9.6, 0.8 Hz, 1H), 3.82 (s, 3H). <sup>13</sup>C NMR (101 MHz, CDCl<sub>3</sub>) δ 168.94 (d, *J* = 26.1 Hz), 135.25 (s), 134.72 (d, *J* = 2.9 Hz), 134.36 (d, *J* = 10.3 Hz), 131.92 (d, *J* = 2.9 Hz), 131.58 (d, *J* = 2.7 Hz), 129.66 (s),

127.25 (s), 125.02 (d,  $J = 20.4$  Hz), 84.40 (d,  $J = 179.3$  Hz), 52.97 (s).  $^{19}\text{F}$  NMR (376 MHz,  $\text{CDCl}_3$ )  $\delta$  -176.83 (s). HRMS (ESI-TOF)  $[\text{M}+\text{Na}]^+$  calculated for  $[\text{C}_{11}\text{H}_9\text{O}_2\text{FCl}_2\text{Na}]^+$  284.9856, observed 284.9857. GC (Astec CHIRALDEX<sup>TM</sup>  $\beta$ -DM column(cat# 77023 AST; serial# 58478-03B), 140 °C isotherm, hold time: 50 min):  $t_{\text{major}} = 39.296$  min;  $t_{\text{minor}} = 37.594$  min.  $[\alpha]_{\text{D}}^{25} = 115.2$  ( $c = 1.0$ ,  $\text{CHCl}_3$ ).

*methyl (S,Z)-4-(3-chloro-4-fluorophenyl)-2-fluorobut-3-enoate*

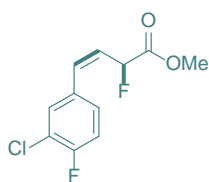

**3s**

Colorless oil, 14.8 mg, yield : 60%. ee: 88%, determined by chiral GC.  $Z/E = 3:1$ , determined by GC.  $^1\text{H}$  NMR (400 MHz,  $\text{CDCl}_3$ )  $\delta$  7.46-7.32 (m, 2H), 7.11 (td,  $J = 7.9, 0.9$  Hz, 1H), 6.98 (d,  $J = 11.6$  Hz, 1H), 5.98 (dt,  $J = 11.4, 9.8$  Hz, 1H), 5.53 (ddd,  $J = 47.8, 9.5, 0.8$  Hz, 1H), 3.84 (s, 3H).  $^{13}\text{C}$  NMR (101 MHz,  $\text{CDCl}_3$ )  $\delta$  168.69 (d,  $J = 26.0$  Hz), 155.59 (d,  $J = 251.4$  Hz), 130.85 (s), 130.01 (dd,  $J = 10.3, 3.8$  Hz), 128.84 (t,  $J = 2.5$  Hz), 125.73 (d,  $J = 20.6$  Hz), 124.42 (d,  $J = 4.9$  Hz), 124.24 (dd,  $J = 14.4, 2.9$  Hz), 121.46 (d,  $J = 17.8$  Hz), 84.25 (d,  $J = 179.1$  Hz), 52.76 (s).  $^{19}\text{F}$  NMR (376 MHz,  $\text{CDCl}_3$ )  $\delta$  -116.42 (s), -177.10 (s). HRMS (ESI-TOF)  $[\text{M}+\text{Na}]^+$  calculated for  $[\text{C}_{11}\text{H}_9\text{O}_2\text{F}_2\text{ClNa}]^+$  269.0151, observed 269.0150. GC (Astec CHIRALDEX<sup>TM</sup>  $\beta$ -DM column(cat# 77023 AST; serial# 58478-03B), 130 °C isotherm, hold time: 50 min):  $t_{\text{major}} = 32.409$  min;  $t_{\text{minor}} = 30.030$  min.  $[\alpha]_{\text{D}}^{25} = 121.8$  ( $c = 1.0$ ,  $\text{CHCl}_3$ ).

*methyl (S,Z)-2-fluoro-4-(4-fluoro-3-methylphenyl)but-3-enoate*

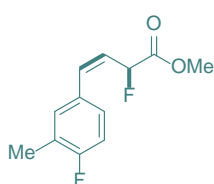

**3t**

Colorless oil, 16.5 mg, yield : 73%. ee: 96%, determined by chiral GC.  $Z/E = 8:1$ , determined by GC.  $^1\text{H}$  NMR (400 MHz,  $\text{CDCl}_3$ )  $\delta$  7.21-7.12 (m, 2H), 7.06-6.95 (m, 1H), 6.89 (dd,  $J = 11.3, 3.6$  Hz, 1H), 5.77 (dd,  $J = 21.0, 9.9$  Hz, 1H), 5.61 (dd,  $J = 47.8, 9.7$  Hz, 1H), 3.83 (s, 3H), 2.28 (d,  $J = 1.7$  Hz, 3H).  $^{13}\text{C}$  NMR (100 MHz,  $\text{CDCl}_3$ )  $\delta$  169.42 (d,  $J = 26.6$  Hz), 161.49 (d,  $J = 247.5$  Hz), 137.54 (d,  $J = 10.5$  Hz), 132.26 (dd,  $J = 5.4, 2.8$  Hz), 130.81 (s), 128.11 (dd,  $J = 8.1, 2.9$  Hz), 125.26 (d,  $J = 17.8$  Hz), 122.66 (d,  $J = 20.3$  Hz), 115.28 (d,  $J = 22.6$  Hz), 84.45 (d,  $J = 178.0$  Hz), 52.87 (s), 14.69 (d,  $J = 3.5$  Hz).  $^{19}\text{F}$  NMR (376 MHz,  $\text{CDCl}_3$ )  $\delta$  -117.09 (s), -174.61 (s). HRMS (ESI-TOF)  $[\text{M}+\text{Na}]^+$  calculated for  $[\text{C}_{12}\text{H}_{12}\text{O}_2\text{F}_2\text{Na}]^+$  249.0698, observed 249.0702. GC (Astec CHIRALDEX<sup>TM</sup>  $\beta$ -DM column(cat# 77023 AST; serial# 58478-03B), 120 °C isotherm, hold time: 50 min):  $t_{\text{major}} = 33.745$  min;  $t_{\text{minor}} = 31.740$  min.  $[\alpha]_{\text{D}}^{25} = 135.8$  ( $c = 1.0$ ,  $\text{CHCl}_3$ ).

*methyl (S,Z)-2-fluoro-4-(3-fluoro-4-methylphenyl)but-3-enoate*

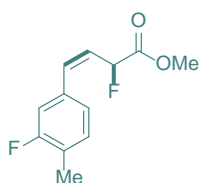

**3u**

Colorless oil, 16.3 mg, yield: 72%. ee: 96%, determined by chiral GC.  $Z/E = 6:1$ , determined by GC.  $^1\text{H}$  NMR (400 MHz,  $\text{CDCl}_3$ )  $\delta$  7.21-7.13 (m, 1H), 7.05 (d,  $J = 9.1$  Hz, 1H), 6.88 (dd,  $J = 11.3, 3.5$  Hz, 1H), 5.80 (dd,  $J = 21.1, 10.1$  Hz, 1H), 5.72-5.50 (m, 1H), 3.83 (s, 1H), 2.28 (d,  $J = 1.5$  Hz, 1H).  $^{13}\text{C}$  NMR (100 MHz,  $\text{CDCl}_3$ )  $\delta$  169.30 (d,  $J = 26.4$  Hz), 161.25 (d,  $J = 245.7$  Hz), 137.10 (dd,  $J = 10.5, 2.0$  Hz), 134.40 (dd,  $J = 7.9, 3.2$  Hz), 131.67 (d,  $J = 5.6$  Hz), 125.42 (d,  $J = 17.1$  Hz), 124.55 (t,  $J = 3.0$  Hz), 123.34 (d,  $J = 20.4$  Hz), 115.48 (d,  $J = 20.4$  Hz), 84.37 (d,  $J = 178.0$  Hz), 52.89 (s), 14.54 (s).  $^{19}\text{F}$  NMR (376 MHz,  $\text{CDCl}_3$ )  $\delta$  -116.91 (s), -175.15 (s). HRMS (ESI-TOF)  $[\text{M}+\text{Na}]^+$  calculated for  $[\text{C}_{12}\text{H}_{12}\text{O}_2\text{F}_2\text{Na}]^+$  249.0698, observed 249.0700. GC (Astec CHIRALDEX<sup>TM</sup>  $\beta$ -DM column(cat# 77023 AST; serial# 58478-03B), 120 °C isotherm, hold time: 50 min):  $t_{\text{major}} = 36.900$  min;  $t_{\text{minor}} = 34.063$  min.  $[\alpha]_{\text{D}}^{25} = 164.4$  ( $c = 1.0$ ,  $\text{CHCl}_3$ ).

*methyl (S,Z)-4-(4-chloro-3-methylphenyl)-2-fluorobut-3-enoate*

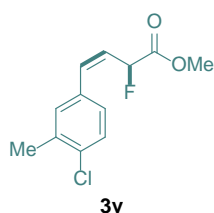

Colorless oil, 17.6 mg, yield: 73%. ee: 96%, determined by chiral GC. *Z/E* = 5:1, determined by GC. <sup>1</sup>H NMR (400 MHz, CDCl<sub>3</sub>) δ 7.34 (d, *J* = 8.2 Hz, 1H), 7.24 (s, 1H), 7.16 (dd, *J* = 8.2, 1.9 Hz, 1H), 6.89 (dd, *J* = 11.3, 3.5 Hz, 1H), 5.81 (dt, *J* = 11.3, 9.8 Hz, 1H), 5.60 (ddd, *J* = 47.8, 9.6, 0.6 Hz, 1H), 3.83 (s, 3H), 2.38 (s, 3H). <sup>13</sup>C NMR (101 MHz, CDCl<sub>3</sub>) δ 169.31 (d, *J* = 26.2 Hz), 137.33 (d, *J* = 10.5 Hz), 136.43 (s), 134.82 (s), 133.52 (s), 131.48 (d, *J* = 2.8 Hz), 129.33 (s), 127.66 (d, *J* = 2.8 Hz), 123.36 (d, *J* = 20.3 Hz), 84.41 (d, *J* = 178.2 Hz), 52.89 (s), 20.22 (s). <sup>19</sup>F NMR (376 MHz, CDCl<sub>3</sub>) δ -174.93 (s). HRMS (ESI-TOF) [M+Na]<sup>+</sup> calculated for [C<sub>12</sub>H<sub>12</sub>O<sub>2</sub>FCINa]<sup>+</sup> 265.0402, observed 265.0399. GC (Astec CHIRALDEX<sup>TM</sup> β-DM column(cat# 77023 AST; serial# 58478-03B), 140 °C isotherm, hold time: 50 min): *t*<sub>major</sub> = 35.405 min; *t*<sub>minor</sub> = 33.976 min. [α]<sub>D</sub><sup>25</sup> = 164.4 (c = 1.0, CHCl<sub>3</sub>).

*methyl (S,Z)-2-fluoro-4-(naphthalen-1-yl)but-3-enoate*

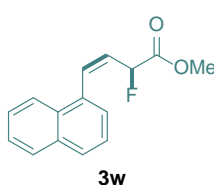

Colorless oil, 6.1 mg, yield : 25%. ee: 97%, determined by chiral GC. *Z/E* = 0.5:1, determined by GC. <sup>1</sup>H NMR (400 MHz, CDCl<sub>3</sub>) δ 7.91 (s, 1H), 7.90-7.81 (m, 3H), 7.56-7.49 (m, 2H), 7.47 (dd, *J* = 8.5, 1.6 Hz, 1H), 7.15 (dd, *J* = 11.3, 3.6 Hz, 1H), 5.92 (dd, *J* = 21.1, 9.8 Hz, 1H), 5.76 (dd, *J* = 47.5, 9.7 Hz, 1H), 3.87 (s, 3H). <sup>13</sup>C NMR (101 MHz, CDCl<sub>3</sub>) δ 169.28 (d, *J* = 26.5 Hz), 138.29 (d, *J* = 10.5 Hz), 132.97 (d, *J* = 13.9 Hz), 132.30 (d, *J* = 3.3 Hz), 128.24 (s), 128.20 (s), 128.14 (s), 127.58 (s), 126.50 (d, *J* = 11.5 Hz), 126.36 (d, *J* = 2.5 Hz), 123.07 (d, *J* = 20.2 Hz), 84.44 (d, *J* = 177.8 Hz), 52.68 (s). <sup>19</sup>F NMR (376 MHz, CDCl<sub>3</sub>) δ -174.52 (s). HRMS (ESI-TOF) [M+Na]<sup>+</sup> calculated for [C<sub>15</sub>H<sub>13</sub>O<sub>2</sub>FNa]<sup>+</sup> 267.0792, observed 267.0790. GC (Astec CHIRALDEX<sup>TM</sup> β-DM column(cat# 77023 AST; serial# 58478-03B), 165 °C isotherm, hold time: 50 min): *t*<sub>major</sub> = 37.483 min; *t*<sub>minor</sub> = 36.302 min. [α]<sub>D</sub><sup>25</sup> = 202.1 (c = 1.0, CHCl<sub>3</sub>).

**Derivatization of the chiral (Z)-allylic fluoride (3a)<sup>5,6</sup>**

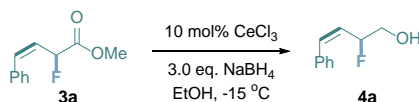

To a solution of **3a** (0.1 mmol) in EtOH (1.0 mL) was added NaBH<sub>4</sub> (6.0 mg, 0.3 mmol) and CeCl<sub>3</sub>·7H<sub>2</sub>O (4.0 mg, 0.01 mmol). The resulting suspension was stirred at -15 °C for 24 h. The solvent was evaporated, and the residue was treated with 1N HCl (2.0 mL) at 0 °C. The aqueous solution was extracted with ethyl acetate (3×5.0 mL). The organic layer was combined and subsequently washed with saturated NaHCO<sub>3</sub> and brine. After drying over anhydrous Na<sub>2</sub>SO<sub>4</sub>, the solvent was evaporated, and the residue was purified by flash column chromatography (10:1 hexane/EtOAc) to afford homoallylic alcohol **4a**<sup>5</sup>. Colorless oil, 20.7 mg, yield = 78%. ee = 91% ee, determined by chiral HPLC. *Z/E* = 8:1, determined by GC. <sup>1</sup>H NMR (400 MHz, CDCl<sub>3</sub>) δ 7.61-7.16 (m, 5H), 6.84 (dd, *J* = 11.7, 3.3 Hz, 1H), 5.78 (dt, *J* = 11.7, 9.3 Hz, 1H), 5.60-5.14 (m, 1H), 3.91-3.60 (m, 2H). <sup>13</sup>C NMR (101 MHz, CDCl<sub>3</sub>) δ 136.44 (d, *J* = 10.8 Hz), 135.53 (d, *J* = 3.1 Hz), 128.66 (d, *J* = 2.7 Hz), 128.44 (s), 127.96 (s), 124.82 (d, *J* = 19.1 Hz), 89.63 (d, *J* = 162.1 Hz), 64.96 (d, *J* = 24.4 Hz). <sup>19</sup>F NMR (376 MHz, CDCl<sub>3</sub>) δ -177.06 (s). HRMS (ESI-TOF) [M+Na]<sup>+</sup> calculated for [C<sub>10</sub>H<sub>12</sub>OF]<sup>+</sup> 167.0867, observed 167.0864. HPLC (Chiralpak-IA column, 98: 2 hexane/ethanol, flow rate: 1.0 mL/min): *t*<sub>major</sub> = 19.410 min; *t*<sub>minor</sub> = 14.982 min. [α]<sub>D</sub><sup>25</sup> = 5.3 (c = 1.0, CHCl<sub>3</sub>).

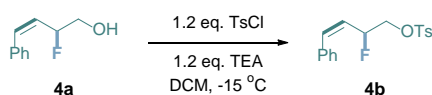

A flame-dried round bottom flask charged with 4-methylbenzenesulfonyl chloride (20.6 mg, 0.12 mmol), CH<sub>2</sub>Cl<sub>2</sub> (1.0 mL), TEA (0.12 mmol), and **4a** (0.1 mmol) was stirred at -15 °C for 12 h. The reaction mixture was quenched with H<sub>2</sub>O (1.0 mL), and extracted with CH<sub>2</sub>Cl<sub>2</sub> (3×5.0 mL). The combined organic layer was washed with brine, dried over Na<sub>2</sub>SO<sub>4</sub> and concentrated under reduced pressure. The residue was purified by flash column chromatography (20:1 hexane/EtOAc) to afford **4b**<sup>6</sup>. Colorless oil, 18.9 mg, yield = 59%. ee = 90%, determined by chiral HPLC. *Z/E* > 10:1, determined by GC. <sup>1</sup>H NMR (400 MHz, CDCl<sub>3</sub>) δ 7.80 (d, *J* = 8.3 Hz, 2H), 7.41-7.28 (m, 5H), 7.24-7.18 (m, 2H), 6.84 (dd, *J* = 11.6, 3.2 Hz, 1H), 5.67 (dt, *J* = 11.6, 9.2 Hz, 1H), 5.53-5.18 (m, 1H), 4.28-4.23 (m, 1H), 4.19 (d, *J* = 4.9 Hz, 1H), 2.45 (s, 3H). <sup>13</sup>C NMR (101 MHz, CDCl<sub>3</sub>) δ 145.04 (s), 137.54 (d, *J* = 10.4 Hz), 134.97 (d, *J* = 3.0 Hz), 132.57 (s), 129.84 (s), 128.57 (s), 128.53 (s), 128.23 (s), 127.92 (s), 123.07 (d, *J* = 19.2 Hz), 85.65 (d, *J* = 169.6 Hz), 70.25 (d, *J* = 25.8 Hz), 21.61 (s). <sup>19</sup>F NMR (376 MHz, CDCl<sub>3</sub>) δ -174.20 (s). HRMS (ESI-TOF) [M+Na]<sup>+</sup> calculated for [C<sub>17</sub>H<sub>17</sub>O<sub>3</sub>FNas]<sup>+</sup> 343.0775, observed 343.0773. HPLC (Chiralpak-IA column, 98: 2 hexane/ethanol, flow rate: 1.0 mL/min): *t*<sub>major</sub> = 19.879 min; *t*<sub>minor</sub> = 18.145 min. [α]<sub>D</sub><sup>25</sup> = 10.4 (c = 1.0, CHCl<sub>3</sub>).

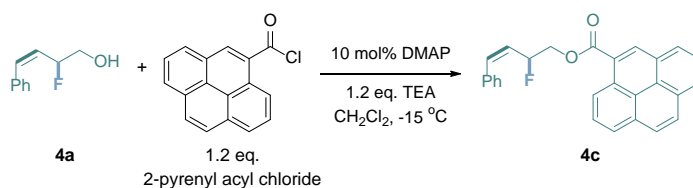

To a solution of **4a** (0.1 mmol) in CH<sub>2</sub>Cl<sub>2</sub> (1.0 mL) was added 2-pyrenyl acyl chloride (0.12 mmol), TEA (0.12 mmol) and DMAP (0.01 mmol). The reaction mixture was stirred at -15 °C for 12 h. Then, the reaction mixture was quenched with H<sub>2</sub>O (1.0 mL), and extracted with CH<sub>2</sub>Cl<sub>2</sub> (3×30.0 mL). The combined organic layer was washed with brine, dried over Na<sub>2</sub>SO<sub>4</sub>, and concentrated under reduced pressure. The residue was purified by flash column chromatography (20:1 hexane/EtOAc) to afford **4c**<sup>6</sup>. Yellow solid, 20.5 mg, yield : 52%. ee: 90%, determined by chiral HPLC. *Z/E* >10:1, determined by GC. <sup>1</sup>H NMR (400 MHz, CDCl<sub>3</sub>) δ 9.27 (d, *J* = 9.4 Hz, 1H), 8.68 (d, *J* = 8.1 Hz, 1H), 8.35-8.22 (m, 3H), 8.17 (t, *J* = 8.3 Hz, 2H), 8.07 (dd, *J* = 12.2, 4.5 Hz, 2H), 7.51-7.23 (m, 5H), 6.95 (dd, *J* = 11.6, 3.2 Hz, 1H), 5.97 (dt, *J* = 11.6, 9.3 Hz, 1H), 5.88-5.53 (m, 1H), 4.94-4.43 (m, 2H). <sup>13</sup>C NMR (101 MHz, CDCl<sub>3</sub>) δ 167.45 (s), 136.93 (d, *J* = 10.5 Hz), 135.39 (d, *J* = 2.9 Hz), 134.51 (s), 131.29 (s), 130.91 (s), 130.27 (s), 129.65 (d, *J* = 14.8 Hz), 128.77 (d, *J* = 2.7 Hz), 128.56 (s), 128.55 (s), 128.11 (s), 127.08 (s), 126.30 (d, *J* = 5.3 Hz), 126.22 (s), 124.74 (s), 124.71 (s), 124.60 (s), 124.41 (s), 124.06 (s), 122.68 (s), 86.57 (d, *J* = 166.7 Hz), 66.10 (d, *J* = 24.7 Hz). <sup>19</sup>F NMR (376 MHz, CDCl<sub>3</sub>) δ -173.83 (s). HRMS (ESI-TOF) [M+Na]<sup>+</sup> calculated for [C<sub>27</sub>H<sub>19</sub>O<sub>2</sub>FNas]<sup>+</sup> 417.1261, observed 417.1260. HPLC (Chiralpak-IA column, 99.5: 0.5 hexane/ethanol, flow rate: 1.0 mL/min): *t*<sub>major</sub> = 21.961 min; *t*<sub>minor</sub> = 20.758 min. [α]<sub>D</sub><sup>25</sup> = 32.9 (c = 1.0, CHCl<sub>3</sub>).

## References

- [1] A. Singh, K. Teegardin, M. Kelly, K. S. Prasad, S. Krishnan, J. D. Weaver, *J. Organomet. Chem.* **2015**, *776*, 51-59.
- [2] C. Zhu, H. Yue, B. Maity, I. Atodiresei, L. Cavallo, M. Rueping, *Nat. Catal.* **2019**, *2*, 678-687.
- [3] C. G. Zhao, F. Y. Li, J. Wang, *Angew. Chem.* **2016**, *128*, 1852-1856; *Angew. Chem. Int. Ed.* **2016**, *55*, 1820-1824.
- [4] a) D. Frederico, P. M. Donate, *J. Org. Chem.* **2003**, *68*, 9126-9128; b) G. M. Coppola, *Synthesis* **1984**, *12*, 1021-1023; c) Y.-M. Zhao, M. S. Cheung, Z. Lin, J. Sun, *Angew. Chem.* **2012**, *124*, 10505-10509; *Angew. Chem., Int. Ed.* **2012**, *51*, 10359-10363.
- [5] Y. Xu, Y. Wei, *Synthetic Commun.* **2010**, *40*, 3423-3429.
- [6] a) Q. Zhang, H. M. Nguyen, *Chem. Sci.* **2014**, *5*, 291-296; b) X.-S. Ning, M.-M. Wang, C.-Z. Yao, X.-M. Chen, Y.-B. Kang, *Org. Lett.* **2016**, *18*, 2700-2703.

## X-ray crystal structure

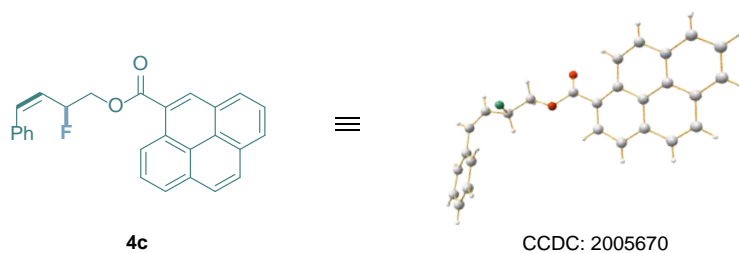

**Figure S1.** ORTEP drawing of the compound **4c** (CCDC: 2005670)

**Table S6.** Crystal data and structure refinement for **4c**.

|                                             |                                                               |
|---------------------------------------------|---------------------------------------------------------------|
| Identification code                         | <b>4c</b>                                                     |
| Empirical formula                           | C <sub>27</sub> H <sub>19</sub> FO <sub>2</sub>               |
| Formula weight                              | 394.42                                                        |
| Temperature/K                               | 100.0(2)                                                      |
| Crystal system                              | monoclinic                                                    |
| Space group                                 | P2 <sub>1</sub>                                               |
| a/Å                                         | 13.5867(11)                                                   |
| b/Å                                         | 4.3673(4)                                                     |
| c/Å                                         | 16.8442(12)                                                   |
| α/°                                         | 90                                                            |
| β/°                                         | 104.545(8)                                                    |
| γ/°                                         | 90                                                            |
| Volume/Å <sup>3</sup>                       | 967.45(14)                                                    |
| Z                                           | 2                                                             |
| ρ <sub>calc</sub> /cm <sup>3</sup>          | 1.354                                                         |
| μ/mm <sup>-1</sup>                          | 0.733                                                         |
| F(000)                                      | 412.0                                                         |
| Crystal size/mm <sup>3</sup>                | 0.14 × 0.12 × 0.1                                             |
| Radiation                                   | Cu Kα (λ = 1.54184)                                           |
| 2θ range for data collection/°              | 5.42 to 149.418                                               |
| Index ranges                                | -16 ≤ h ≤ 16, -5 ≤ k ≤ 5, -9 ≤ l ≤ 20                         |
| Reflections collected                       | 3636                                                          |
| Independent reflections                     | 3636 [R <sub>int</sub> = 0.0505, R <sub>sigma</sub> = 0.0473] |
| Data/restraints/parameters                  | 3636/1/272                                                    |
| Goodness-of-fit on F <sup>2</sup>           | 1.065                                                         |
| Final R indexes [I ≥ 2σ (I)]                | R <sub>1</sub> = 0.0973, wR <sub>2</sub> = 0.2945             |
| Final R indexes [all data]                  | R <sub>1</sub> = 0.0997, wR <sub>2</sub> = 0.2962             |
| Largest diff. peak/hole / e Å <sup>-3</sup> | 0.53/-0.44                                                    |



|                        |                   |
|------------------------|-------------------|
| Flack/Hoofit parameter | 0.01(15)/0.00(10) |
|------------------------|-------------------|

**Table S7.** Fractional Atomic Coordinates ( $\times 10^4$ ) and Equivalent Isotropic Displacement Parameters ( $\text{\AA}^2 \times 10^3$ ) for **4c**.  $U_{\text{eq}}$  is defined as 1/3 of of the trace of the orthogonalised  $U_{\text{ij}}$  tensor.

| Atom | <i>x</i> | <i>y</i> | <i>z</i>   | $U(\text{eq})$ |
|------|----------|----------|------------|----------------|
| F1   | 2531(2)  | 1315(6)  | 4802.3(15) | 38.0(7)        |
| O1   | 386(2)   | 5278(10) | 6175.1(17) | 41.5(9)        |
| O2   | 1880(2)  | 5385(9)  | 5834.4(17) | 36.1(8)        |
| C1   | 1945(3)  | 6085(10) | 7221(2)    | 29.4(10)       |
| C2   | 2805(3)  | 7881(12) | 7309(3)    | 36.8(11)       |
| C3   | 3394(3)  | 8633(11) | 8068(3)    | 34.9(11)       |
| C4   | 3178(3)  | 7459(11) | 8774(3)    | 34.2(11)       |
| C5   | 2319(3)  | 5517(12) | 8710(2)    | 31.2(10)       |
| C6   | 1675(3)  | 4855(10) | 7913(2)    | 29.1(10)       |
| C7   | 3792(4)  | 8126(12) | 9581(3)    | 38.3(12)       |
| C8   | 3593(3)  | 6937(14) | 10256(3)   | 42.1(13)       |
| C9   | 2752(3)  | 4898(11) | 10211(2)   | 33.2(11)       |
| C10  | 2105(3)  | 4252(11) | 9417(3)    | 31.2(10)       |
| C11  | 1267(3)  | 2300(11) | 9360(3)    | 32.3(11)       |
| C12  | 1074(4)  | 1024(13) | 10066(3)   | 39.0(12)       |
| C13  | 1709(4)  | 1727(12) | 10838(3)   | 41.2(13)       |
| C14  | 2528(4)  | 3618(11) | 10902(3)   | 37.6(12)       |
| C15  | 627(3)   | 1668(12) | 8562(3)    | 36.3(12)       |
| C16  | 818(3)   | 2899(12) | 7879(3)    | 33.7(11)       |
| C17  | 1292(3)  | 5492(12) | 6372(2)    | 35.0(11)       |
| C18  | 1345(3)  | 5075(13) | 4981(2)    | 33.9(11)       |
| C19  | 2161(3)  | 4268(11) | 4550(2)    | 33.1(11)       |
| C20  | 1784(3)  | 4350(11) | 3630(3)    | 33.0(11)       |

**Table S8.** Anisotropic Displacement Parameters ( $\text{\AA}^2 \times 10^3$ ) for **4c**. The Anisotropic displacement factor exponent takes the form:  $-2\pi^2[h^2a^{*2}U_{11}+2hka^*b^*U_{12}+\dots]$ .

| Atom | $U_{11}$ | $U_{22}$ | $U_{33}$ | $U_{23}$ | $U_{13}$ | $U_{12}$ |
|------|----------|----------|----------|----------|----------|----------|
| F1   | 42.9(12) | 30.5(14) | 41.8(11) | 0.0(11)  | 13.1(10) | 3.8(11)  |
| O1   | 30.5(13) | 64(2)    | 33.5(13) | 2.0(16)  | 13.6(10) | 2.3(16)  |
| O2   | 32.8(13) | 49.8(19) | 28.6(11) | -3.2(13) | 13.1(10) | 0.5(15)  |
| C1   | 36.5(19) | 20(2)    | 34.5(17) | -1.0(16) | 14.1(14) | 3.5(17)  |
| C2   | 42(2)    | 39(3)    | 34.2(18) | -0.8(19) | 17.3(15) | 6(2)     |
| C3   | 36.1(19) | 31(2)    | 39.2(19) | -6.6(18) | 12.3(16) | 2.7(19)  |
| C4   | 33.7(19) | 34(2)    | 36.4(19) | -4.3(18) | 11.0(15) | 6.5(18)  |

**Table S8.** Anisotropic Displacement Parameters ( $\text{\AA}^2 \times 10^3$ ) for **4c**. The Anisotropic displacement factor exponent takes the form:  $-2\pi^2[h^2a^{*2}U_{11}+2hka^*b^*U_{12}+\dots]$ .

| Atom | U <sub>11</sub> | U <sub>22</sub> | U <sub>33</sub> | U <sub>23</sub> | U <sub>13</sub> | U <sub>12</sub> |
|------|-----------------|-----------------|-----------------|-----------------|-----------------|-----------------|
| C5   | 27.2(16)        | 37(2)           | 31.4(16)        | -2.0(17)        | 11.3(13)        | 11.8(18)        |
| C6   | 27.4(17)        | 29(2)           | 33.5(17)        | -5.9(16)        | 12.5(13)        | 7.3(16)         |
| C7   | 33(2)           | 37(3)           | 44(2)           | -11(2)          | 7.8(17)         | -1(2)           |
| C8   | 32(2)           | 61(3)           | 32.1(18)        | -18(2)          | 4.8(16)         | 5(2)            |
| C9   | 33.4(19)        | 35(2)           | 31.8(17)        | -7.1(17)        | 8.4(15)         | 10.6(19)        |
| C10  | 30.7(18)        | 31(2)           | 34.1(18)        | -2.1(17)        | 13.0(14)        | 10.0(17)        |
| C11  | 32.3(19)        | 31(2)           | 35.6(18)        | 1.1(17)         | 11.4(15)        | 8.4(18)         |
| C12  | 40(2)           | 42(3)           | 37.0(19)        | 5(2)            | 12.1(16)        | 3(2)            |
| C13  | 58(3)           | 39(3)           | 29.4(17)        | 5.2(18)         | 15.8(16)        | 13(2)           |
| C14  | 47(2)           | 35(3)           | 32.5(19)        | 0.1(18)         | 13.2(16)        | 9(2)            |
| C15  | 34.0(19)        | 40(3)           | 35.5(19)        | -1.8(19)        | 10.5(15)        | -4(2)           |
| C16  | 32.0(19)        | 38(2)           | 31.3(17)        | -0.6(19)        | 8.3(15)         | 5.0(19)         |
| C17  | 40.8(19)        | 39(2)           | 31.3(16)        | 3.2(18)         | 19.9(13)        | 7.4(19)         |
| C18  | 32.0(18)        | 42(3)           | 29.3(16)        | 4.8(18)         | 9.9(14)         | 2(2)            |
| C19  | 39(2)           | 32(2)           | 29.9(18)        | -2.0(17)        | 11.4(16)        | 2.3(19)         |
| C20  | 34(2)           | 29(2)           | 34.4(19)        | -3.9(17)        | 5.2(16)         | 0.4(18)         |
| C21  | 41(2)           | 37(2)           | 25.0(16)        | -4.4(18)        | 5.2(15)         | 8(2)            |
| C22  | 42(2)           | 26(2)           | 30.8(16)        | -6.2(16)        | 16.2(14)        | 3.8(18)         |
| C23  | 50(2)           | 45(3)           | 31.2(18)        | -1(2)           | 15.9(16)        | 1(2)            |
| C24  | 39(2)           | 33(2)           | 48(2)           | -2.0(19)        | 20.6(16)        | 1(2)            |
| C25  | 32.7(19)        | 34(2)           | 55(2)           | -16(2)          | 17.7(16)        | -12.5(19)       |
| C26  | 38(2)           | 40(3)           | 36.0(18)        | -11.2(19)       | 10.7(16)        | 2(2)            |
| C27  | 35.5(19)        | 35(2)           | 31.5(17)        | -3.9(17)        | 12.7(14)        | 6.7(19)         |

**Table S9.** Bond Lengths for **4c**.

| Atom Atom | Length/ $\text{\AA}$ | Atom Atom | Length/ $\text{\AA}$ |
|-----------|----------------------|-----------|----------------------|
| F1 C19    | 1.410(5)             | C9 C14    | 1.391(7)             |
| O1 C17    | 1.195(5)             | C10 C11   | 1.406(6)             |
| O2 C17    | 1.351(5)             | C11 C12   | 1.397(7)             |
| O2 C18    | 1.445(5)             | C11 C15   | 1.433(6)             |
| C1 C2     | 1.384(7)             | C12 C13   | 1.402(6)             |
| C1 C6     | 1.412(6)             | C13 C14   | 1.369(7)             |
| C1 C17    | 1.504(5)             | C15 C16   | 1.353(7)             |
| C2 C3     | 1.368(6)             | C18 C19   | 1.511(7)             |
| C3 C4     | 1.391(7)             | C19 C20   | 1.505(6)             |
| C4 C5     | 1.425(7)             | C20 C21   | 1.299(7)             |
| C4 C7     | 1.435(6)             | C21 C22   | 1.495(6)             |

**Table S9.** Bond Lengths for **4c**.

| Atom | Atom | Length/Å | Atom | Atom | Length/Å |
|------|------|----------|------|------|----------|
| C5   | C6   | 1.436(5) | C22  | C23  | 1.394(7) |
| C5   | C10  | 1.407(6) | C22  | C27  | 1.394(6) |
| C6   | C16  | 1.435(6) | C23  | C24  | 1.373(7) |
| C7   | C8   | 1.338(7) | C24  | C25  | 1.371(6) |
| C8   | C9   | 1.436(7) | C25  | C26  | 1.382(7) |
| C9   | C10  | 1.433(5) | C26  | C27  | 1.399(7) |

**Table S10.** Bond Angles for **4c**.

| Atom | Atom | Atom | Angle/°  | Atom | Atom | Atom | Angle/°  |
|------|------|------|----------|------|------|------|----------|
| C17  | O2   | C18  | 115.8(3) | C12  | C11  | C10  | 120.4(4) |
| C2   | C1   | C6   | 121.0(4) | C12  | C11  | C15  | 121.5(4) |
| C2   | C1   | C17  | 118.7(4) | C11  | C12  | C13  | 120.0(5) |
| C6   | C1   | C17  | 120.4(4) | C14  | C13  | C12  | 120.2(5) |
| C3   | C2   | C1   | 121.1(4) | C13  | C14  | C9   | 121.4(4) |
| C2   | C3   | C4   | 120.7(5) | C16  | C15  | C11  | 121.4(4) |
| C3   | C4   | C5   | 120.0(4) | C15  | C16  | C6   | 122.0(4) |
| C3   | C4   | C7   | 122.5(4) | O1   | C17  | O2   | 123.6(4) |
| C5   | C4   | C7   | 117.5(4) | O1   | C17  | C1   | 126.7(4) |
| C4   | C5   | C6   | 119.0(4) | O2   | C17  | C1   | 109.6(4) |
| C10  | C5   | C4   | 120.6(4) | O2   | C18  | C19  | 104.7(3) |
| C10  | C5   | C6   | 120.3(4) | F1   | C19  | C18  | 108.5(4) |
| C1   | C6   | C5   | 118.1(4) | F1   | C19  | C20  | 109.6(4) |
| C1   | C6   | C16  | 124.7(4) | C20  | C19  | C18  | 112.8(4) |
| C16  | C6   | C5   | 117.1(4) | C21  | C20  | C19  | 127.6(4) |
| C8   | C7   | C4   | 122.3(5) | C20  | C21  | C22  | 128.0(4) |
| C7   | C8   | C9   | 121.6(4) | C23  | C22  | C21  | 119.2(4) |
| C10  | C9   | C8   | 117.7(4) | C27  | C22  | C21  | 122.6(4) |
| C14  | C9   | C8   | 122.9(4) | C27  | C22  | C23  | 118.1(4) |
| C14  | C9   | C10  | 119.4(4) | C24  | C23  | C22  | 120.8(4) |
| C5   | C10  | C9   | 120.3(4) | C25  | C24  | C23  | 121.2(5) |
| C11  | C10  | C5   | 121.1(4) | C24  | C25  | C26  | 119.4(4) |
| C11  | C10  | C9   | 118.6(4) | C25  | C26  | C27  | 120.0(4) |
| C10  | C11  | C15  | 118.1(4) | C22  | C27  | C26  | 120.4(4) |

**Table 11.** Torsion Angles for **4c**.

| A  | B   | C   | D   | Angle/°  | A  | B   | C   | D   | Angle/°  |
|----|-----|-----|-----|----------|----|-----|-----|-----|----------|
| F1 | C19 | C20 | C21 | -93.6(6) | C8 | C9  | C14 | C13 | 178.8(5) |
| O2 | C18 | C19 | F1  | 67.8(5)  | C9 | C10 | C11 | C12 | 0.0(7)   |

**Table 11.** Torsion Angles for **4c**.

| A  | B   | C   | D   | Angle/°   | A   | B   | C   | D   | Angle/°   |
|----|-----|-----|-----|-----------|-----|-----|-----|-----|-----------|
| O2 | C18 | C19 | C20 | -170.6(4) | C9  | C10 | C11 | C15 | -179.9(4) |
| C1 | C2  | C3  | C4  | 3.9(8)    | C10 | C5  | C6  | C1  | -177.6(4) |
| C1 | C6  | C16 | C15 | 176.6(5)  | C10 | C5  | C6  | C16 | 0.4(6)    |
| C2 | C1  | C6  | C5  | -0.1(6)   | C10 | C9  | C14 | C13 | 0.7(7)    |
| C2 | C1  | C6  | C16 | -178.0(5) | C10 | C11 | C12 | C13 | 1.0(7)    |
| C2 | C1  | C17 | O1  | -144.1(6) | C10 | C11 | C15 | C16 | 0.1(7)    |
| C2 | C1  | C17 | O2  | 32.6(6)   | C11 | C12 | C13 | C14 | -1.2(8)   |
| C2 | C3  | C4  | C5  | -1.7(7)   | C11 | C15 | C16 | C6  | 1.0(8)    |
| C2 | C3  | C4  | C7  | 178.4(5)  | C12 | C11 | C15 | C16 | -179.8(5) |
| C3 | C4  | C5  | C6  | -1.3(7)   | C12 | C13 | C14 | C9  | 0.3(8)    |
| C3 | C4  | C5  | C10 | 178.5(4)  | C14 | C9  | C10 | C5  | -179.8(4) |
| C3 | C4  | C7  | C8  | -178.5(5) | C14 | C9  | C10 | C11 | -0.8(7)   |
| C4 | C5  | C6  | C1  | 2.2(6)    | C15 | C11 | C12 | C13 | -179.1(5) |
| C4 | C5  | C6  | C16 | -179.8(4) | C17 | O2  | C18 | C19 | -167.0(4) |
| C4 | C5  | C10 | C9  | -0.2(7)   | C17 | C1  | C2  | C3  | 176.3(5)  |
| C4 | C5  | C10 | C11 | -179.1(4) | C17 | C1  | C6  | C5  | -179.4(4) |
| C4 | C7  | C8  | C9  | 0.3(8)    | C17 | C1  | C6  | C16 | 2.7(7)    |
| C5 | C4  | C7  | C8  | 1.6(7)    | C18 | O2  | C17 | O1  | 1.7(8)    |
| C5 | C6  | C16 | C15 | -1.3(7)   | C18 | O2  | C17 | C1  | -175.2(4) |
| C5 | C10 | C11 | C12 | 179.0(5)  | C18 | C19 | C20 | C21 | 145.3(5)  |
| C5 | C10 | C11 | C15 | -0.9(7)   | C19 | C20 | C21 | C22 | 3.7(9)    |
| C6 | C1  | C2  | C3  | -2.9(7)   | C20 | C21 | C22 | C23 | -151.8(5) |
| C6 | C1  | C17 | O1  | 35.2(8)   | C20 | C21 | C22 | C27 | 32.1(8)   |
| C6 | C1  | C17 | O2  | -148.1(4) | C21 | C22 | C23 | C24 | -178.7(5) |
| C6 | C5  | C10 | C9  | 179.6(4)  | C21 | C22 | C27 | C26 | 178.8(4)  |
| C6 | C5  | C10 | C11 | 0.6(7)    | C22 | C23 | C24 | C25 | 0.0(8)    |
| C7 | C4  | C5  | C6  | 178.6(4)  | C23 | C22 | C27 | C26 | 2.6(7)    |
| C7 | C4  | C5  | C10 | -1.6(7)   | C23 | C24 | C25 | C26 | 2.2(8)    |
| C7 | C8  | C9  | C10 | -2.1(7)   | C24 | C25 | C26 | C27 | -2.0(7)   |
| C7 | C8  | C9  | C14 | 179.8(5)  | C25 | C26 | C27 | C22 | -0.4(7)   |
| C8 | C9  | C10 | C5  | 2.0(7)    | C27 | C22 | C23 | C24 | -2.4(7)   |
| C8 | C9  | C10 | C11 | -179.0(4) |     |     |     |     |           |

**Table 12.** Hydrogen Atom Coordinates ( $\text{\AA}\times 10^4$ ) and Isotropic Displacement Parameters ( $\text{\AA}^2\times 10^3$ ) for **4c**.

| Atom | x       | y       | z       | U(eq) |
|------|---------|---------|---------|-------|
| H2   | 2984.65 | 8587.98 | 6844.01 | 44    |
| H3   | 3944.99 | 9942.96 | 8113.54 | 42    |

**Table 12.** Hydrogen Atom Coordinates ( $\text{\AA}\times 10^4$ ) and Isotropic Displacement Parameters ( $\text{\AA}^2\times 10^3$ ) for **4c**.

| Atom | <i>x</i> | <i>y</i> | <i>z</i> | U(eq) |
|------|----------|----------|----------|-------|
| H7   | 4346.39  | 9429.07  | 9637     | 46    |
| H8   | 4010.54  | 7442.17  | 10766.9  | 50    |
| H12  | 525.36   | -290.88  | 10024.2  | 47    |
| H13  | 1572.51  | 905.21   | 11308.75 | 49    |
| H14  | 2944.65  | 4056.86  | 11418.16 | 45    |
| H15  | 68.99    | 384.56   | 8512.51  | 44    |
| H16  | 379.14   | 2463.38  | 7371.59  | 40    |
| H18A | 1012.35  | 6978.58  | 4770.4   | 41    |
| H18B | 838.13   | 3467.12  | 4909.51  | 41    |
| H19  | 2720.58  | 5735.07  | 4717.06  | 40    |
| H20  | 1114.69  | 3737.17  | 3414.55  | 40    |
| H21  | 1917.72  | 5199.29  | 2555.57  | 42    |
| H23  | 3189.25  | 8903.84  | 2283.22  | 49    |
| H24  | 4856.06  | 10316.29 | 2483.05  | 46    |
| H25  | 6079.55  | 8489.89  | 3581.24  | 47    |
| H26  | 5640.29  | 4931.33  | 4452.88  | 45    |
| H27  | 3952.88  | 3442.5   | 4257.56  | 40    |

#### Crystal structure determination of **4c**

**Crystal Data** for  $\text{C}_{27}\text{H}_{19}\text{FO}_2$  ( $M = 394.42$  g/mol): monoclinic, space group  $\text{P}2_1$  (no. 4),  $a = 13.5867(11)$   $\text{\AA}$ ,  $b = 4.3673(4)$   $\text{\AA}$ ,  $c = 16.8442(12)$   $\text{\AA}$ ,  $\beta = 104.545(8)^\circ$ ,  $V = 967.45(14)$   $\text{\AA}^3$ ,  $Z = 2$ ,  $T = 100.0(2)$  K,  $\mu(\text{Cu K}\alpha) = 0.733$   $\text{mm}^{-1}$ ,  $D_{\text{calc}} = 1.354$   $\text{g/cm}^3$ , 3636 reflections measured ( $5.42^\circ \leq 2\theta \leq 149.418^\circ$ ), 3636 unique ( $R_{\text{int}} = 0.0505$ ,  $R_{\text{sigma}} = 0.0473$ ) which were used in all calculations. The final  $R_1$  was 0.0973 ( $I > 2\sigma(I)$ ) and  $wR_2$  was 0.2962 (all data).

## Chiral GC spectra

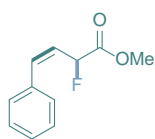

3a

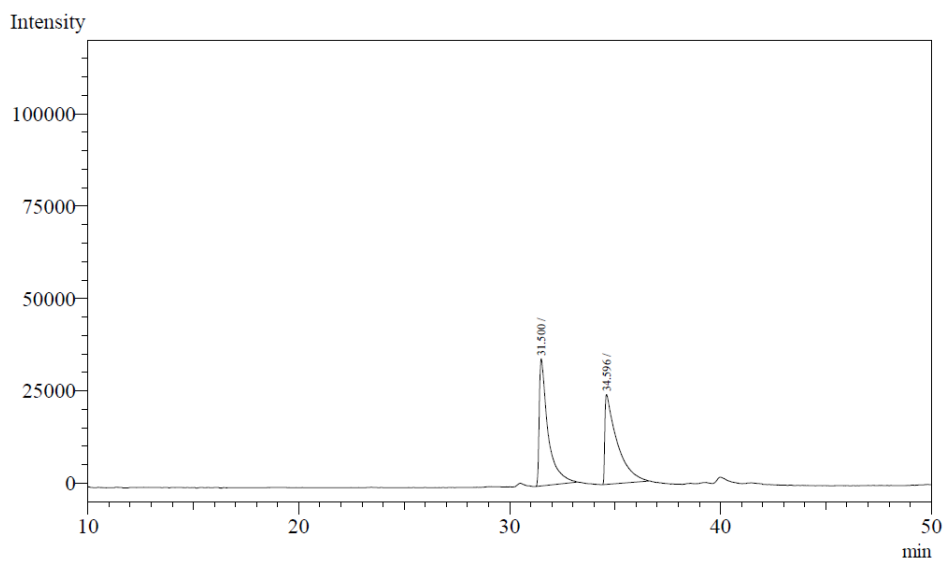

| Peak#        | Ret.Time | Area    | Height | Area%  | Height% |
|--------------|----------|---------|--------|--------|---------|
| 1            | 31.500   | 995984  | 34414  | 50.41  | 58.56   |
| 2            | 34.596   | 979930  | 24351  | 49.59  | 41.44   |
| <b>Total</b> |          | 1975914 | 58765  | 100.00 | 100.00  |

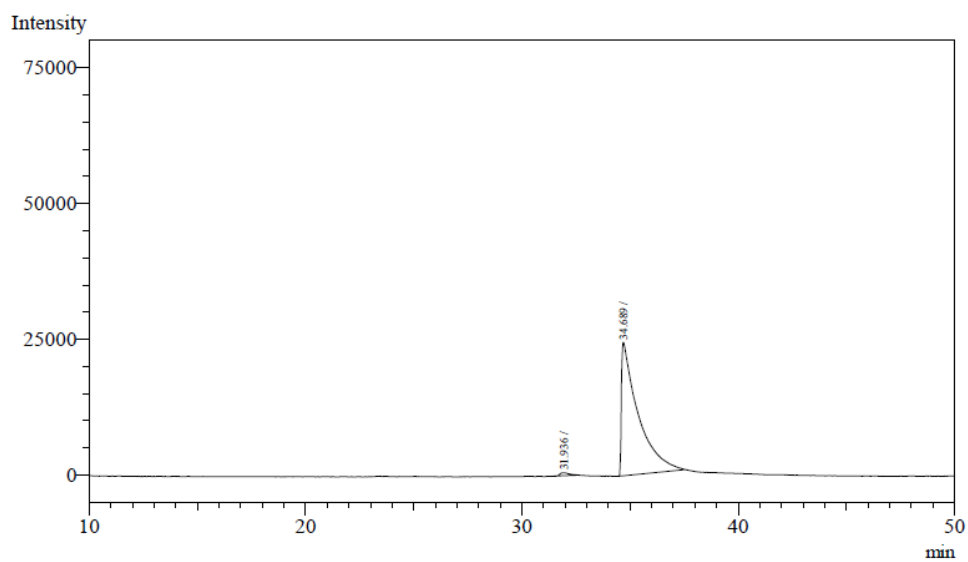

| Peak#        | Ret.Time | Area    | Height | Area%  | Height% |
|--------------|----------|---------|--------|--------|---------|
| 1            | 31.936   | 15757   | 549    | 1.19   | 2.19    |
| 2            | 34.689   | 1311864 | 24575  | 98.81  | 97.81   |
| <b>Total</b> |          | 1327621 | 25124  | 100.00 | 100.00  |

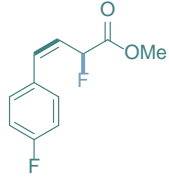

**3b**

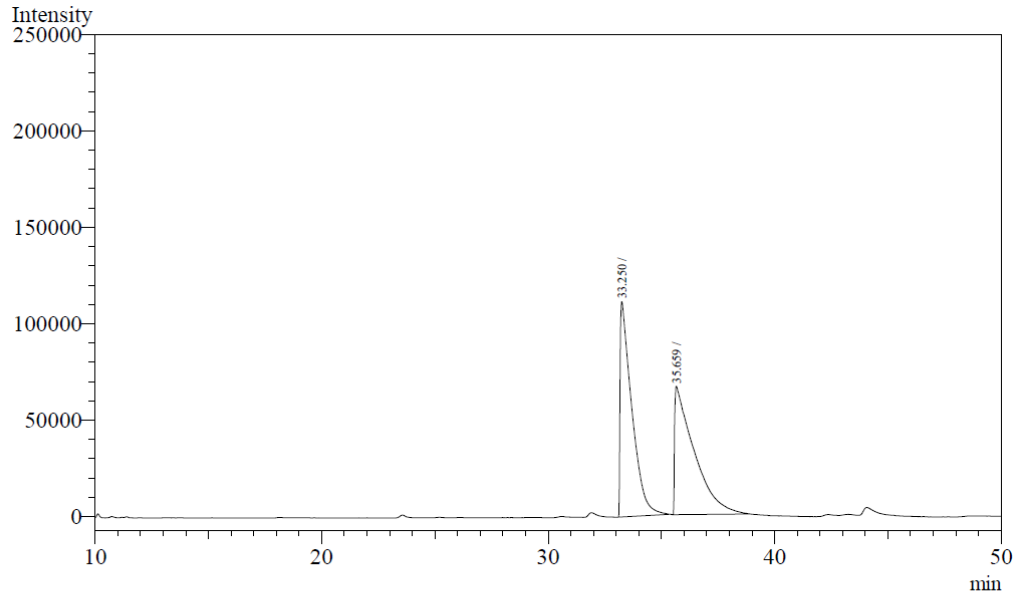

| Peak#        | Ret. Time | Area           | Height        | Area%         | Height%       |
|--------------|-----------|----------------|---------------|---------------|---------------|
| 1            | 33.250    | 4007329        | 111586        | 50.24         | 62.66         |
| 2            | 35.659    | 3968459        | 66497         | 49.76         | 37.34         |
| <b>Total</b> |           | <b>7975788</b> | <b>178083</b> | <b>100.00</b> | <b>100.00</b> |

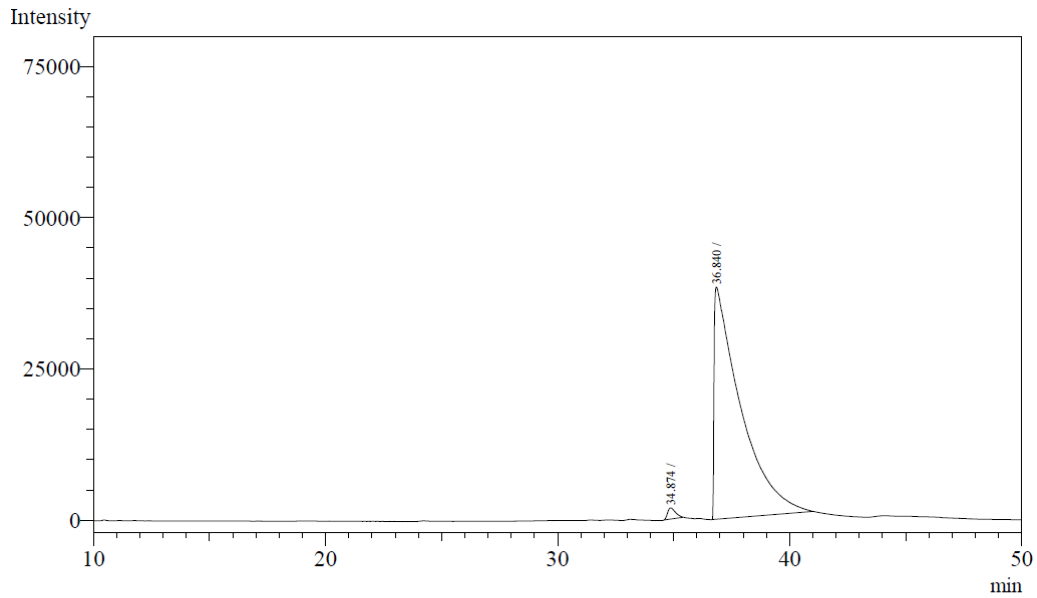

| Peak#        | Ret. Time | Area           | Height       | Area%         | Height%       |
|--------------|-----------|----------------|--------------|---------------|---------------|
| 1            | 34.874    | 43543          | 1846         | 1.41          | 4.59          |
| 2            | 36.840    | 3034198        | 38386        | 98.59         | 95.41         |
| <b>Total</b> |           | <b>3077741</b> | <b>40232</b> | <b>100.00</b> | <b>100.00</b> |

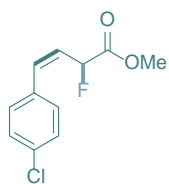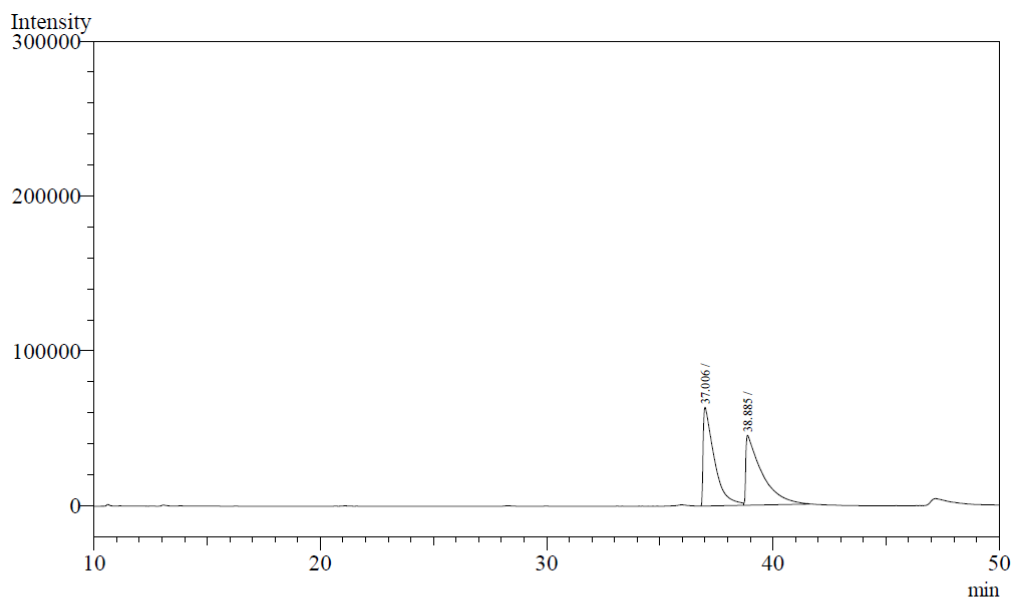

| Peak#        | Ret.Time | Area           | Height        | Area%         | Height%       |
|--------------|----------|----------------|---------------|---------------|---------------|
| 1            | 37.006   | 2183497        | 63797         | 49.50         | 58.54         |
| 2            | 38.885   | 2227202        | 45190         | 50.50         | 41.46         |
| <b>Total</b> |          | <b>4410699</b> | <b>108987</b> | <b>100.00</b> | <b>100.00</b> |

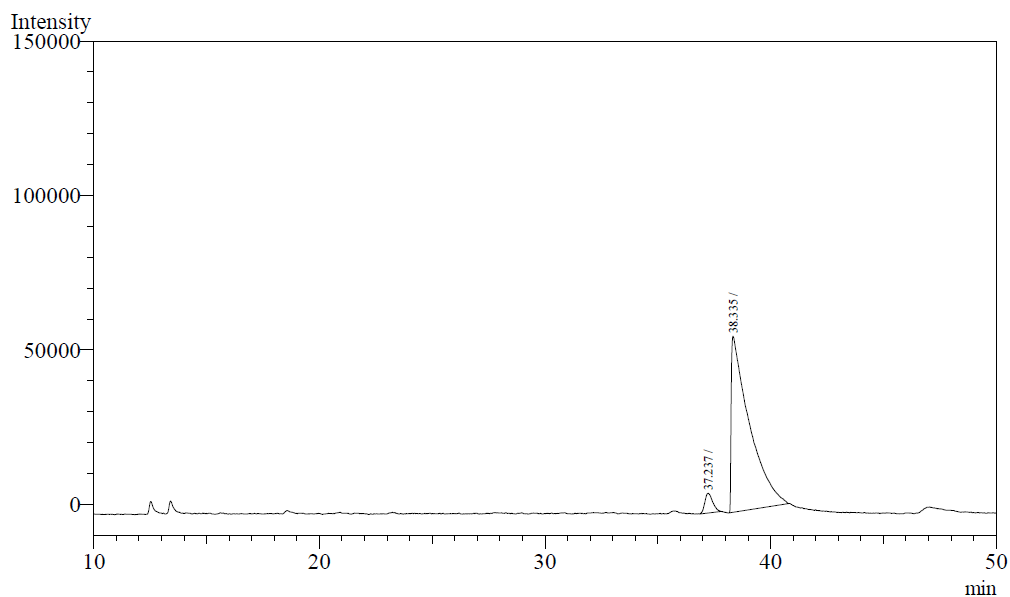

| Peak#        | Ret.Time | Area           | Height       | Area%         | Height%       |
|--------------|----------|----------------|--------------|---------------|---------------|
| 1            | 37.237   | 153825         | 6365         | 4.61          | 10.04         |
| 2            | 38.335   | 3186548        | 57023        | 95.39         | 89.96         |
| <b>Total</b> |          | <b>3340373</b> | <b>63388</b> | <b>100.00</b> | <b>100.00</b> |



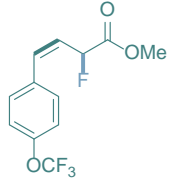

**3d**

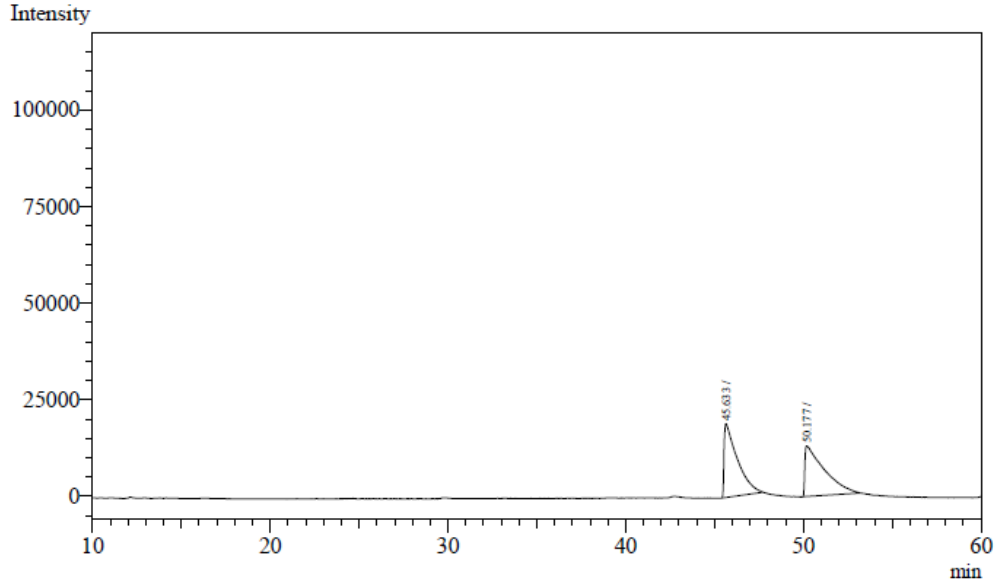

| Peak#        | Ret. Time | Area           | Height       | Area%         | Height%       |
|--------------|-----------|----------------|--------------|---------------|---------------|
| 1            | 45.633    | 984294         | 19080        | 49.78         | 59.31         |
| 2            | 50.177    | 992824         | 13092        | 50.22         | 40.69         |
| <b>Total</b> |           | <b>1977118</b> | <b>32172</b> | <b>100.00</b> | <b>100.00</b> |

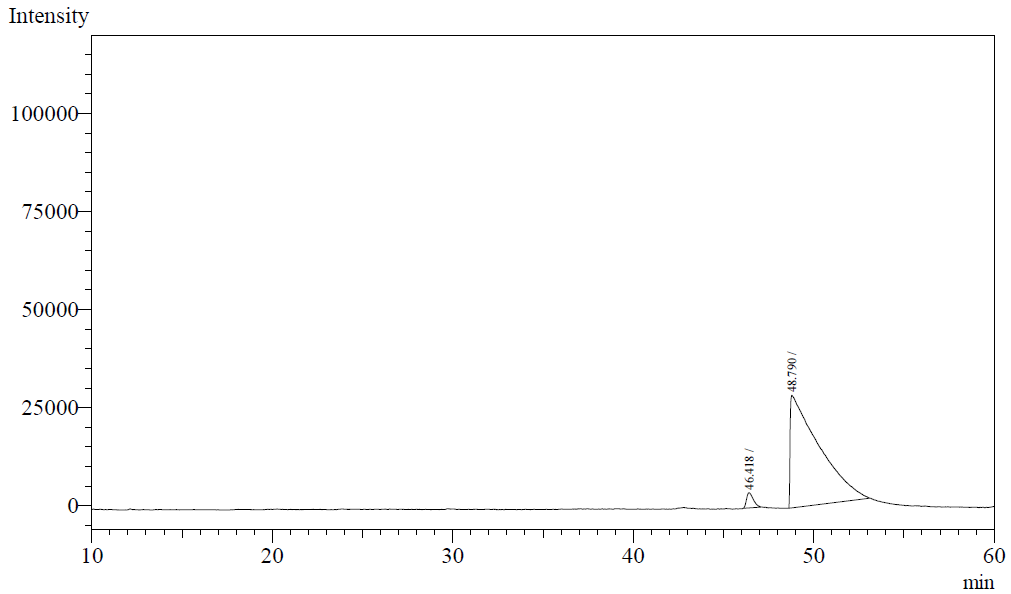

| Peak#        | Ret. Time | Area           | Height       | Area%         | Height%       |
|--------------|-----------|----------------|--------------|---------------|---------------|
| 1            | 46.418    | 101516         | 3872         | 3.09          | 11.88         |
| 2            | 48.790    | 3178685        | 28722        | 96.91         | 88.12         |
| <b>Total</b> |           | <b>3280201</b> | <b>32594</b> | <b>100.00</b> | <b>100.00</b> |

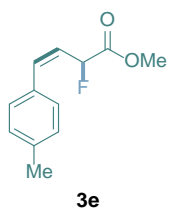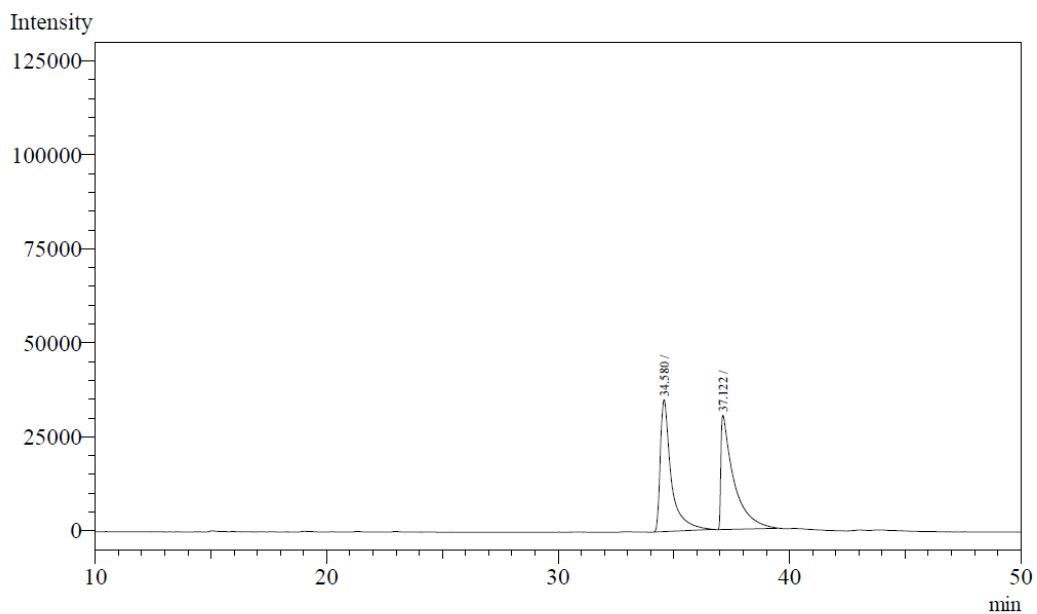

| Peak#        | Ret. Time | Area           | Height       | Area%         | Height%       |
|--------------|-----------|----------------|--------------|---------------|---------------|
| 1            | 34.580    | 1153166        | 35037        | 49.55         | 53.57         |
| 2            | 37.122    | 1174238        | 30373        | 50.45         | 46.43         |
| <b>Total</b> |           | <b>2327404</b> | <b>65410</b> | <b>100.00</b> | <b>100.00</b> |

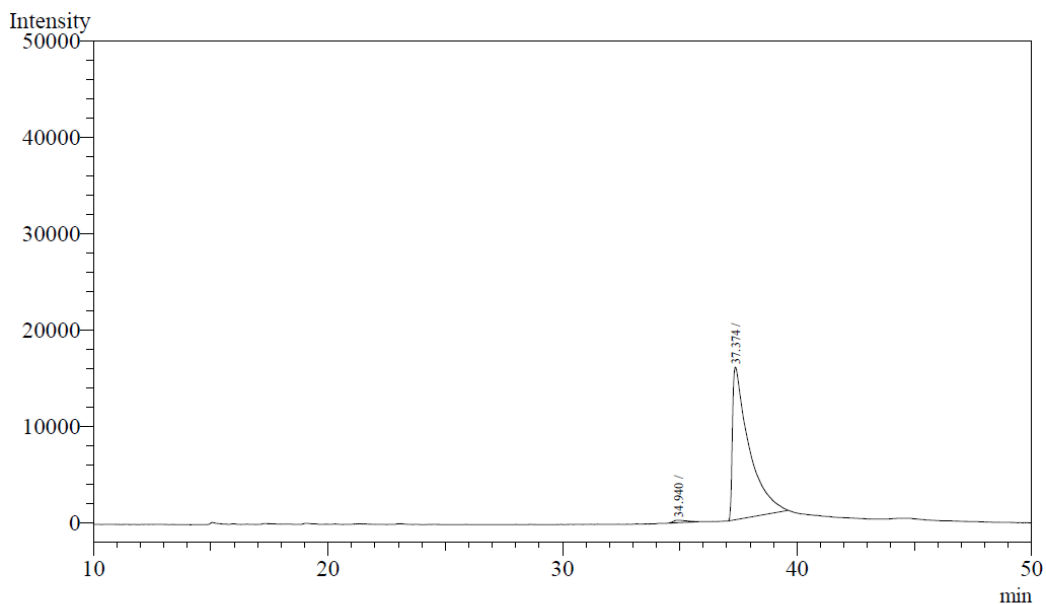

| Peak#        | Ret. Time | Area          | Height       | Area%         | Height%       |
|--------------|-----------|---------------|--------------|---------------|---------------|
| 1            | 34.940    | 9839          | 258          | 1.25          | 1.61          |
| 2            | 37.374    | 777990        | 15829        | 98.75         | 98.39         |
| <b>Total</b> |           | <b>787829</b> | <b>16087</b> | <b>100.00</b> | <b>100.00</b> |

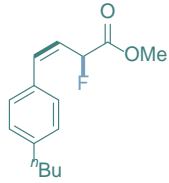

**3f**

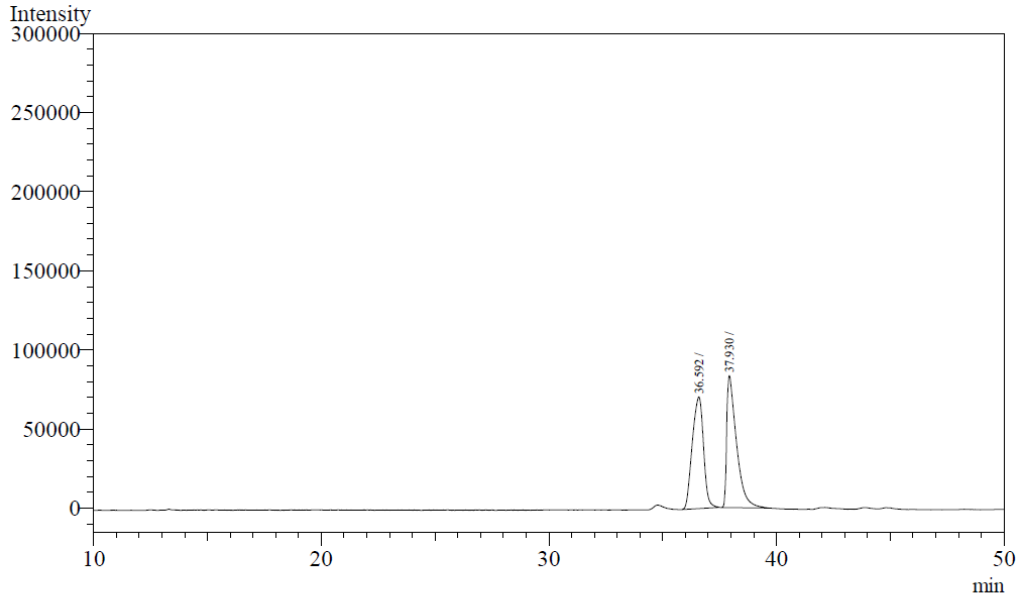

| Peak#        | Ret. Time | Area    | Height | Area%  | Height% |
|--------------|-----------|---------|--------|--------|---------|
| 1            | 36.592    | 2417212 | 70624  | 49.34  | 45.88   |
| 2            | 37.930    | 2482037 | 83324  | 50.66  | 54.12   |
| <b>Total</b> |           | 4899249 | 153948 | 100.00 | 100.00  |

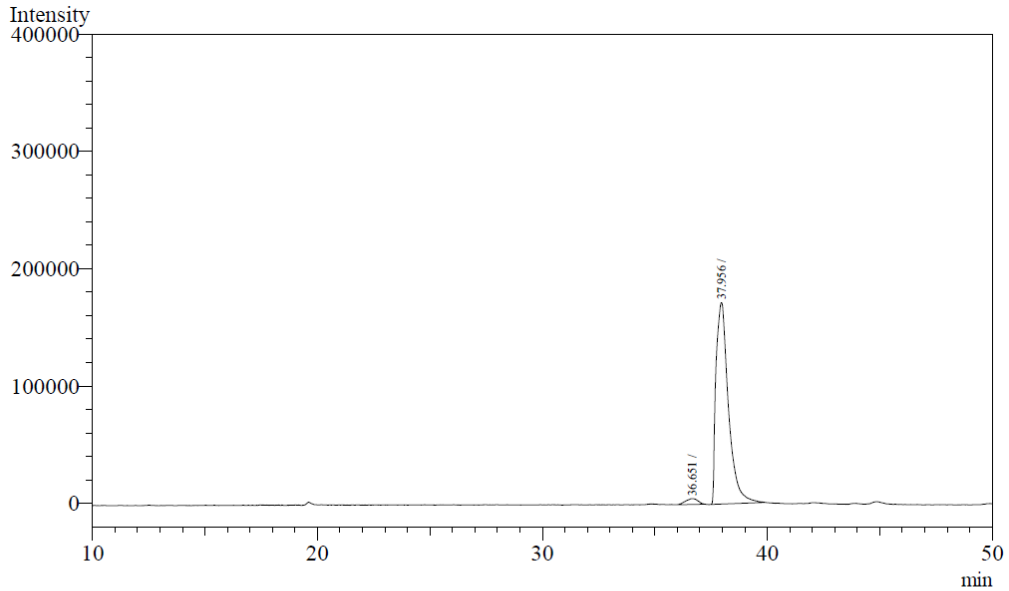

| Peak#        | Ret. Time | Area    | Height | Area%  | Height% |
|--------------|-----------|---------|--------|--------|---------|
| 1            | 36.651    | 188549  | 5065   | 2.78   | 2.87    |
| 2            | 37.956    | 6591773 | 171661 | 97.22  | 97.13   |
| <b>Total</b> |           | 6780322 | 176726 | 100.00 | 100.00  |

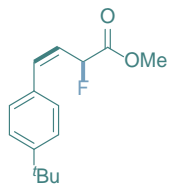

**3g**

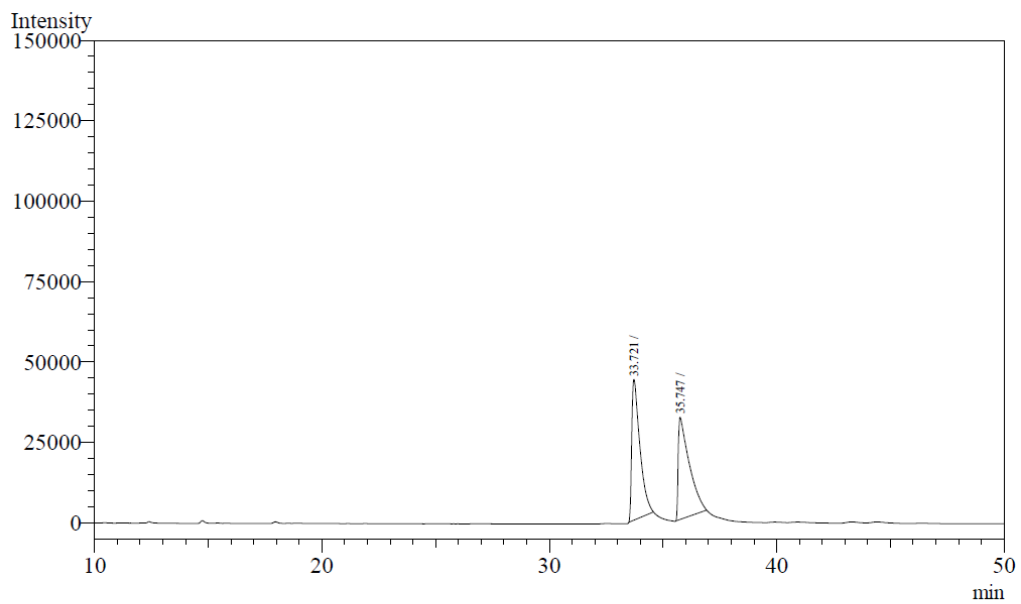

| Peak#        | Ret.Time | Area             | Height          | Area%         | Height%       |
|--------------|----------|------------------|-----------------|---------------|---------------|
| 1            | 2.370    | 153378253        | 25370875        | 98.61         | 99.70         |
| 2            | 33.721   | 1090065          | 43769           | 0.70          | 0.17          |
| 3            | 35.747   | 1068340          | 31789           | 0.69          | 0.12          |
| <b>Total</b> |          | <b>155536658</b> | <b>25446433</b> | <b>100.00</b> | <b>100.00</b> |

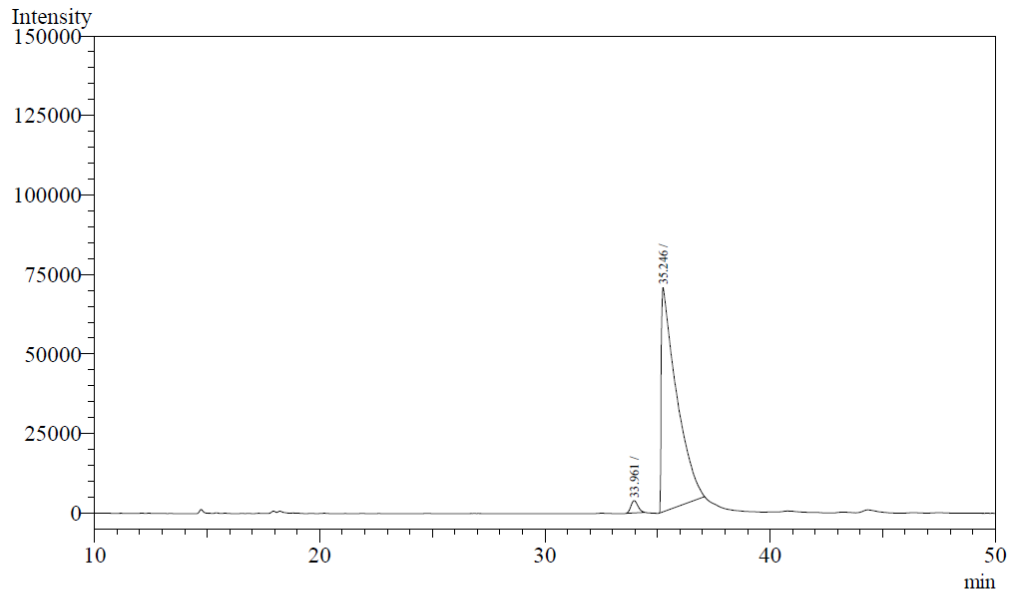

| Peak#        | Ret.Time | Area    | Height | Area%  | Height% |
|--------------|----------|---------|--------|--------|---------|
| 1            | 33.961   | 84107   | 3881   | 2.48   | 5.22    |
| 2            | 35.246   | 3310672 | 70504  | 97.52  | 94.78   |
| <b>Total</b> |          | 3394779 | 74385  | 100.00 | 100.00  |

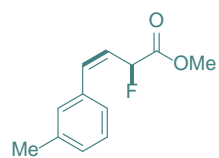

**3h**

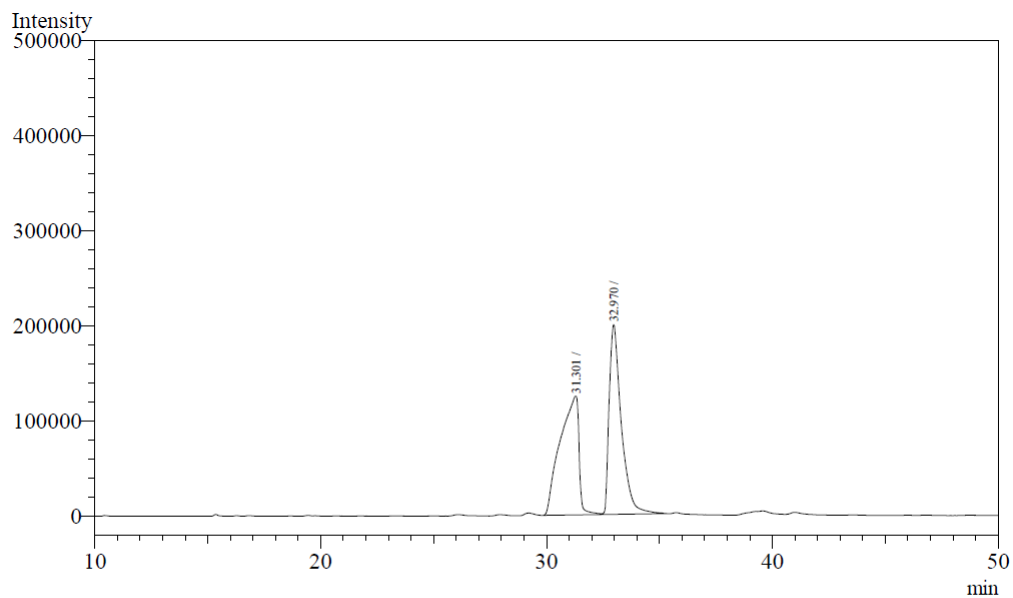

| Peak#        | Ret.Time | Area     | Height | Area%  | Height% |
|--------------|----------|----------|--------|--------|---------|
| 1            | 31.301   | 7285359  | 124729 | 49.43  | 38.50   |
| 2            | 32.970   | 7453113  | 199277 | 50.57  | 61.50   |
| <b>Total</b> |          | 14738472 | 324006 | 100.00 | 100.00  |

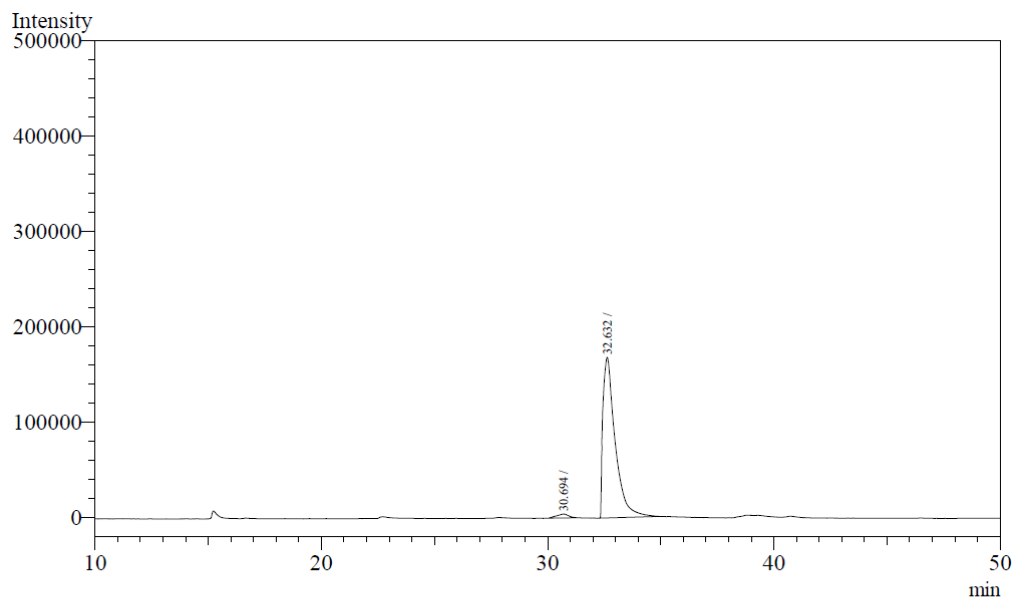

| Peak#        | Ret.Time | Area    | Height | Area%  | Height% |
|--------------|----------|---------|--------|--------|---------|
| 1            | 30.694   | 153830  | 4073   | 2.37   | 2.36    |
| 2            | 32.632   | 6333438 | 168442 | 97.63  | 97.64   |
| <b>Total</b> |          | 6487268 | 172515 | 100.00 | 100.00  |

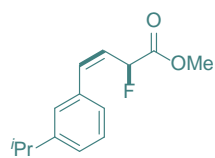

**3i**

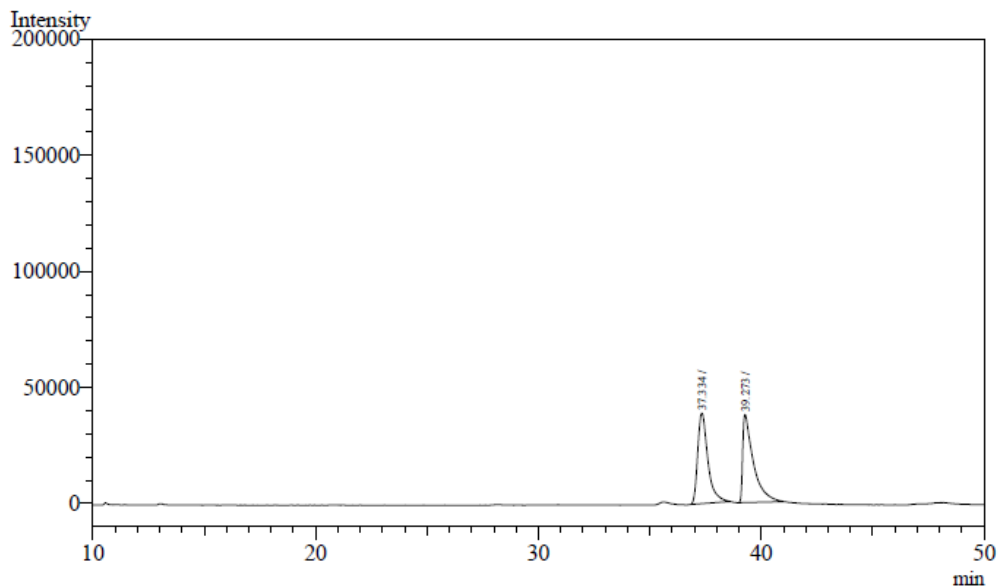

| Peak#        | Ret. Time | Area    | Height | Area%  | Height% |
|--------------|-----------|---------|--------|--------|---------|
| 1            | 37.334    | 1239252 | 38960  | 49.65  | 50.68   |
| 2            | 39.273    | 1256875 | 37912  | 50.35  | 49.32   |
| <b>Total</b> |           | 2496127 | 76872  | 100.00 | 100.00  |

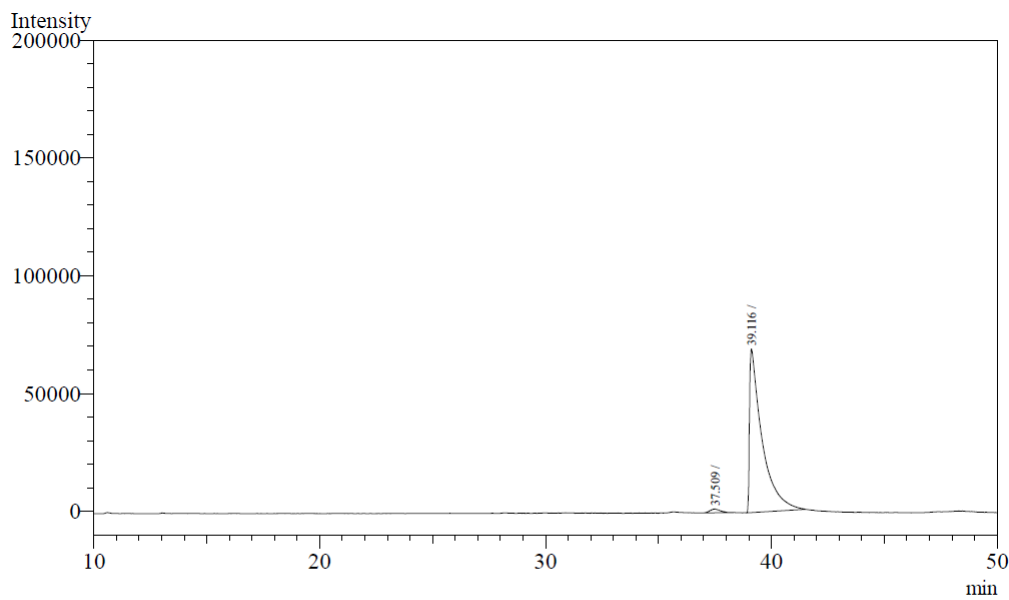

| Peak#        | Ret. Time | Area    | Height | Area%  | Height% |
|--------------|-----------|---------|--------|--------|---------|
| 1            | 37.509    | 50580   | 1585   | 1.86   | 2.23    |
| 2            | 39.116    | 2671682 | 69373  | 98.14  | 97.77   |
| <b>Total</b> |           | 2722262 | 70958  | 100.00 | 100.00  |

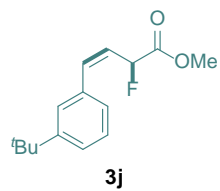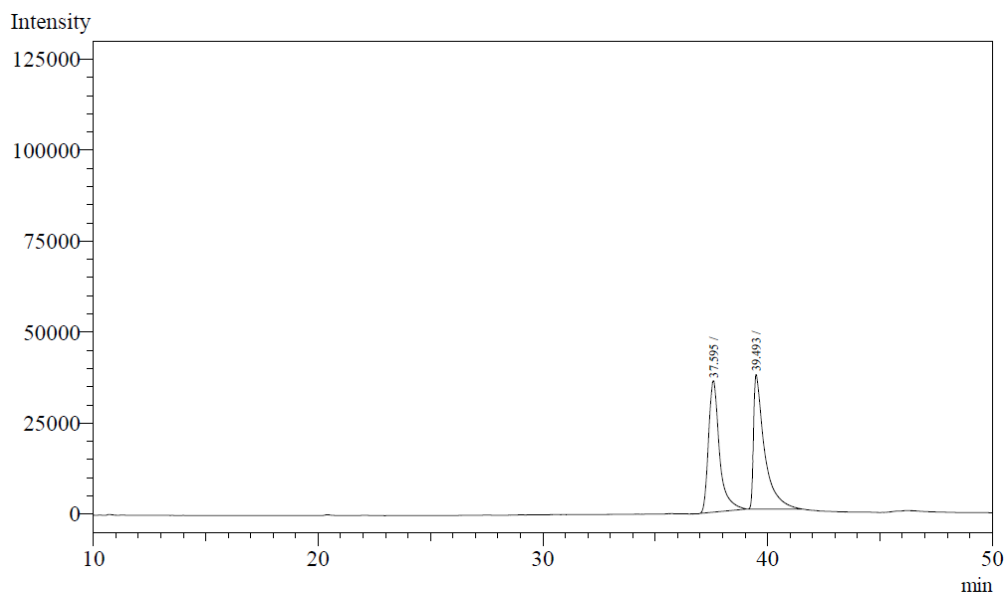

| Peak#        | Ret.Time | Area    | Height | Area%  | Height% |
|--------------|----------|---------|--------|--------|---------|
| 1            | 37.595   | 1231049 | 36118  | 49.45  | 49.40   |
| 2            | 39.493   | 1258391 | 36992  | 50.55  | 50.60   |
| <b>Total</b> |          | 2489440 | 73110  | 100.00 | 100.00  |

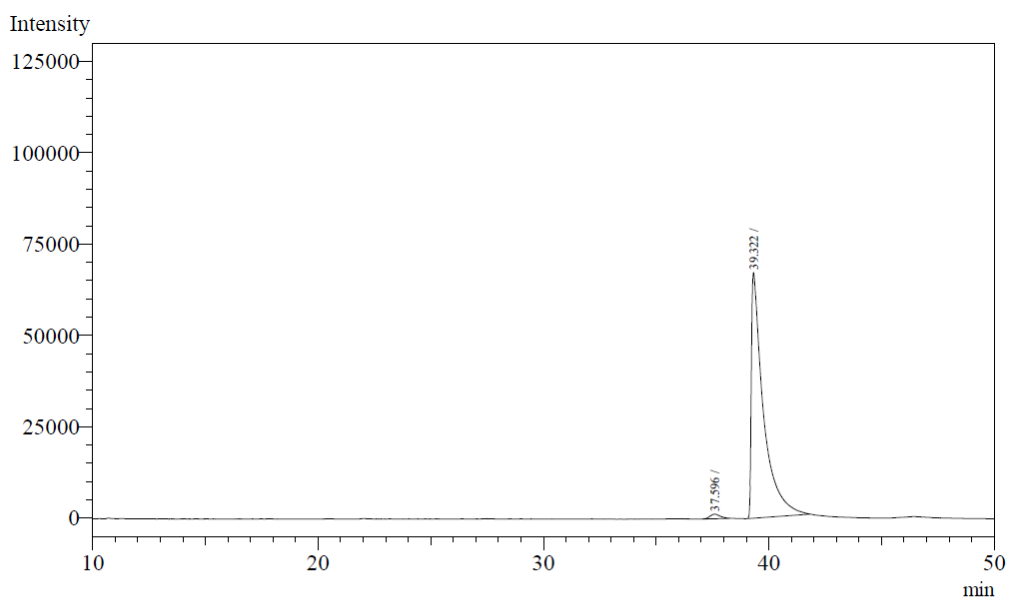

| Peak#        | Ret.Time | Area    | Height | Area%  | Height% |
|--------------|----------|---------|--------|--------|---------|
| 1            | 37.596   | 39669   | 1246   | 1.57   | 1.82    |
| 2            | 39.322   | 2488585 | 67232  | 98.43  | 98.18   |
| <b>Total</b> |          | 2528254 | 68478  | 100.00 | 100.00  |



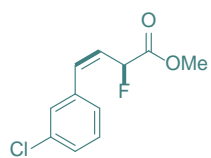

**3k**

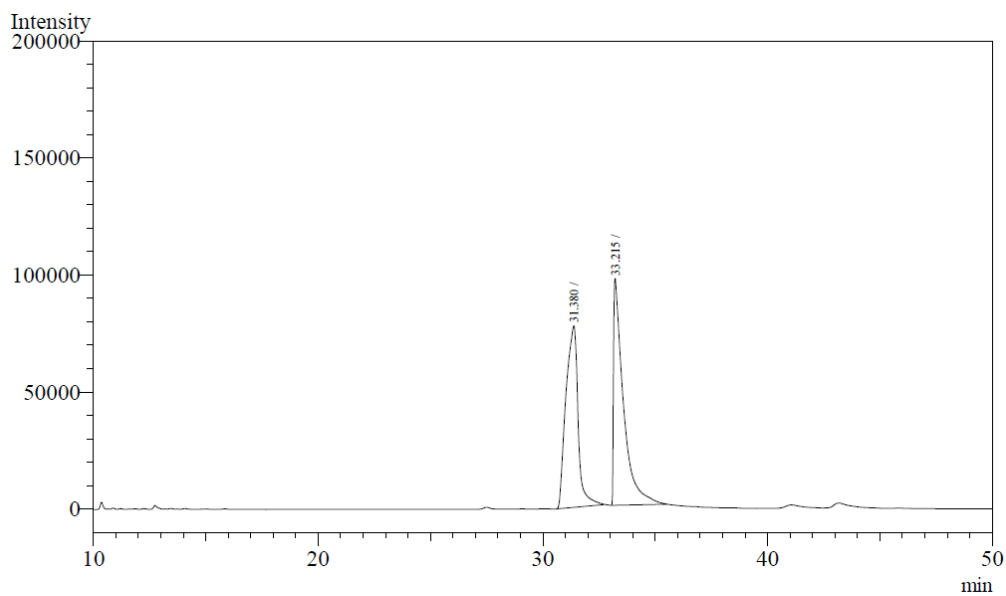

| Peak#        | Ret.Time | Area    | Height | Area%  | Height% |
|--------------|----------|---------|--------|--------|---------|
| 1            | 31.380   | 2927113 | 77547  | 49.73  | 44.44   |
| 2            | 33.215   | 2959363 | 96939  | 50.27  | 55.56   |
| <b>Total</b> |          | 5886476 | 174486 | 100.00 | 100.00  |

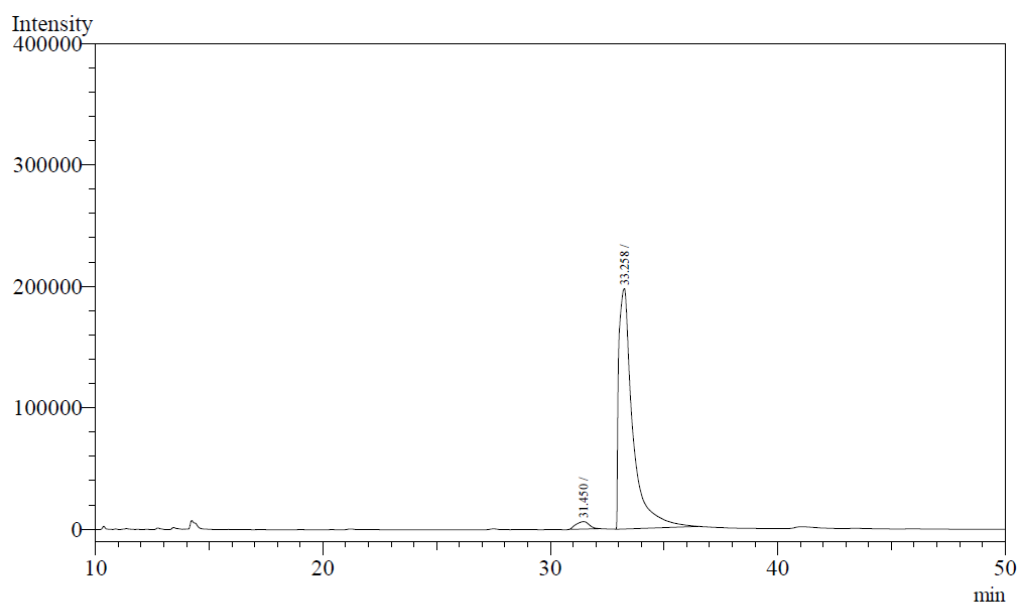

| Peak#        | Ret.Time | Area    | Height | Area%  | Height% |
|--------------|----------|---------|--------|--------|---------|
| 1            | 31.450   | 251250  | 6189   | 2.89   | 3.03    |
| 2            | 33.258   | 8446231 | 197958 | 97.11  | 96.97   |
| <b>Total</b> |          | 8697481 | 204147 | 100.00 | 100.00  |

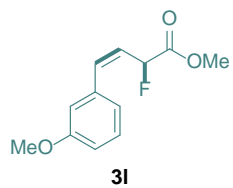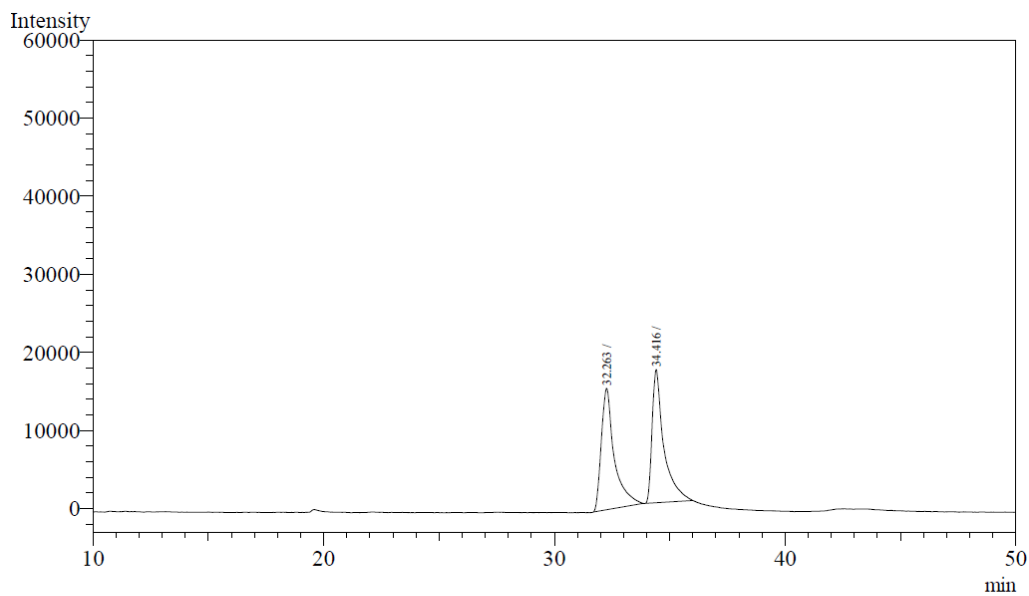

| Peak#        | Ret.Time | Area           | Height       | Area%         | Height%       |
|--------------|----------|----------------|--------------|---------------|---------------|
| 1            | 32.263   | 610154         | 15534        | 50.28         | 47.68         |
| 2            | 34.416   | 603425         | 17048        | 49.72         | 52.32         |
| <b>Total</b> |          | <b>1213579</b> | <b>32582</b> | <b>100.00</b> | <b>100.00</b> |

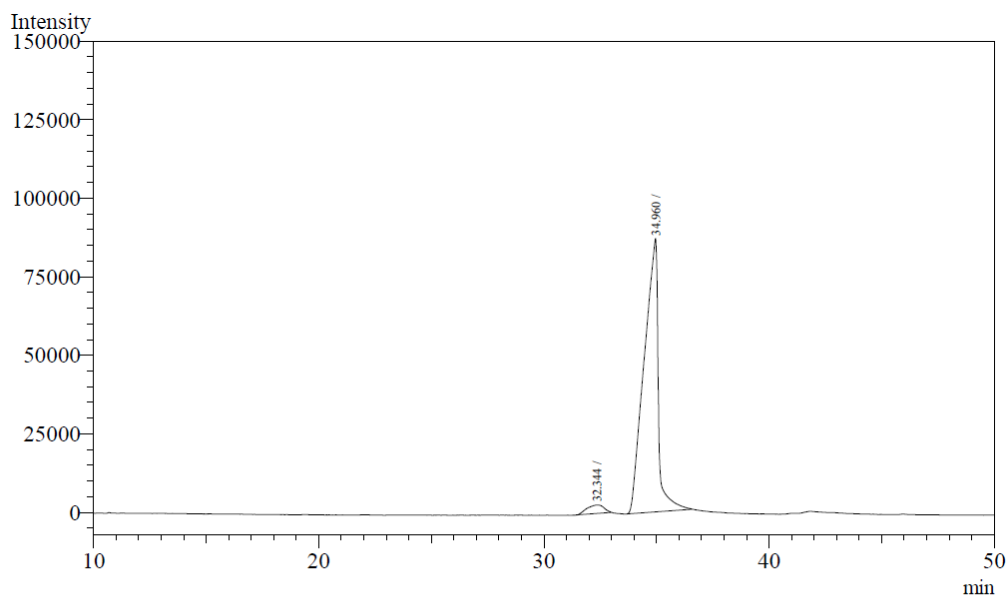

| Peak#        | Ret.Time | Area           | Height       | Area%         | Height%       |
|--------------|----------|----------------|--------------|---------------|---------------|
| 1            | 32.344   | 141119         | 2700         | 3.56          | 3.01          |
| 2            | 34.960   | 3823411        | 87013        | 96.44         | 96.99         |
| <b>Total</b> |          | <b>3964530</b> | <b>89713</b> | <b>100.00</b> | <b>100.00</b> |

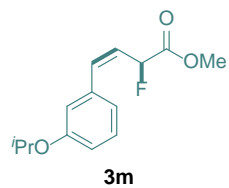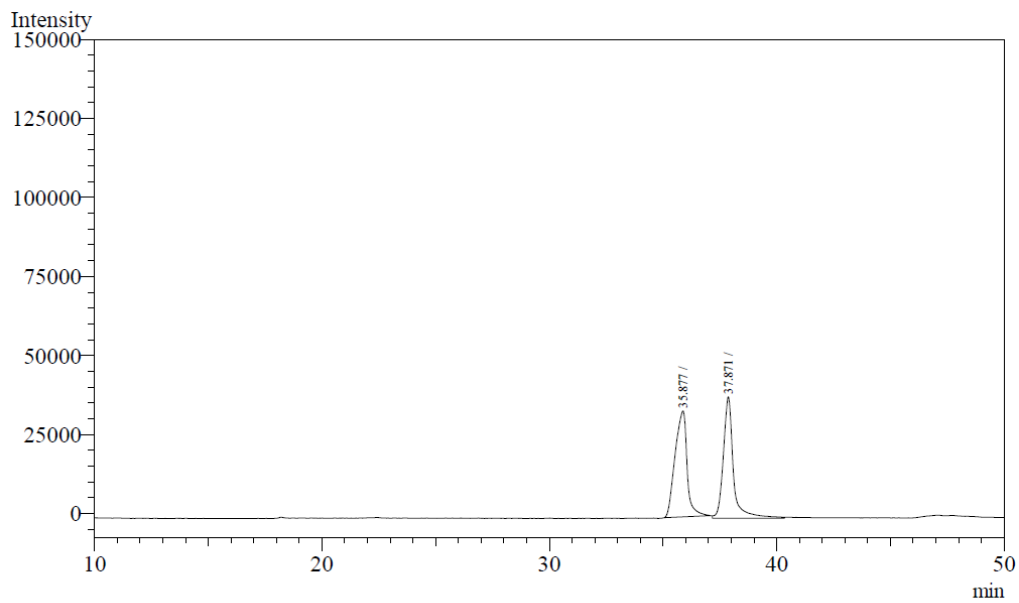

| Peak#        | Ret.Time | Area    | Height | Area%  | Height% |
|--------------|----------|---------|--------|--------|---------|
| 1            | 35.877   | 1230533 | 33503  | 50.93  | 46.59   |
| 2            | 37.871   | 1185827 | 38407  | 49.07  | 53.41   |
| <b>Total</b> |          | 2416360 | 71910  | 100.00 | 100.00  |

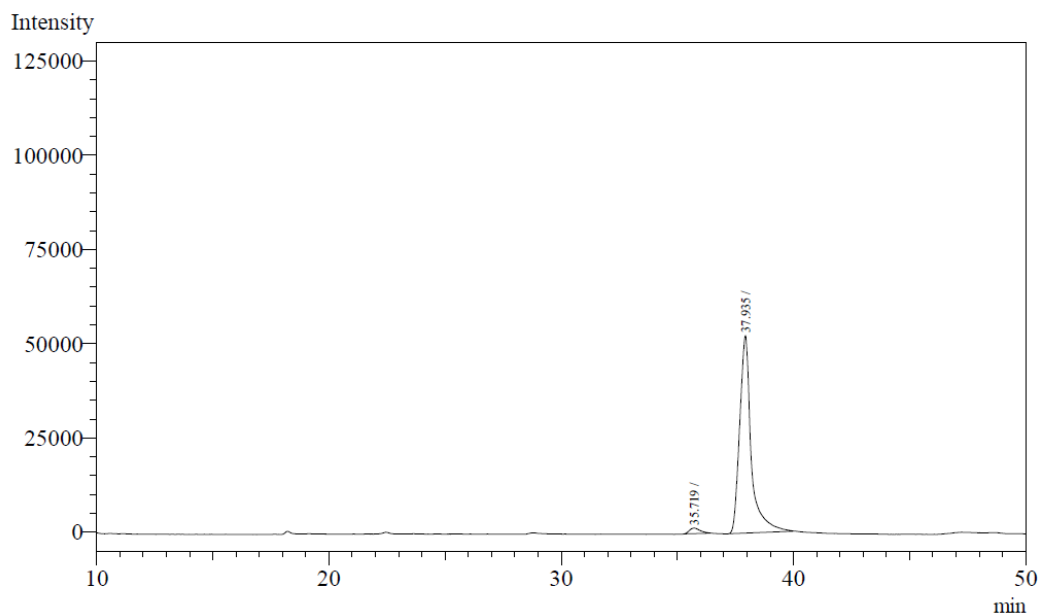

| Peak#        | Ret.Time | Area    | Height | Area%  | Height% |
|--------------|----------|---------|--------|--------|---------|
| 1            | 35.719   | 46712   | 1470   | 2.52   | 2.73    |
| 2            | 37.935   | 1808561 | 52374  | 97.48  | 97.27   |
| <b>Total</b> |          | 1855273 | 53844  | 100.00 | 100.00  |

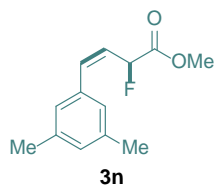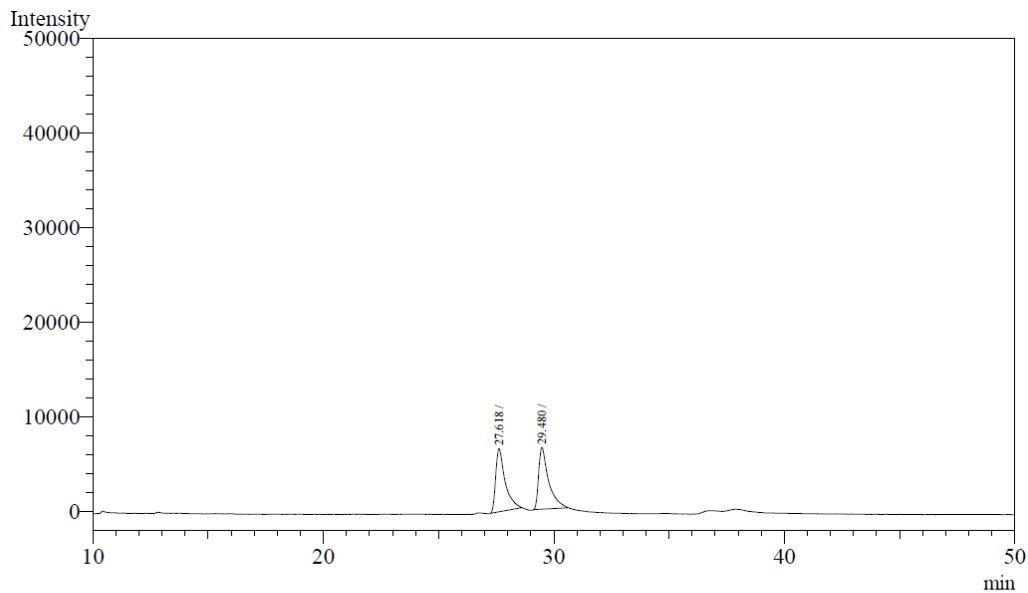

| Peak#        | Ret.Time | Area   | Height | Area%  | Height% |
|--------------|----------|--------|--------|--------|---------|
| 1            | 27.618   | 189911 | 6690   | 49.30  | 50.64   |
| 2            | 29.480   | 195334 | 6522   | 50.70  | 49.36   |
| <b>Total</b> |          | 385245 | 13212  | 100.00 | 100.00  |

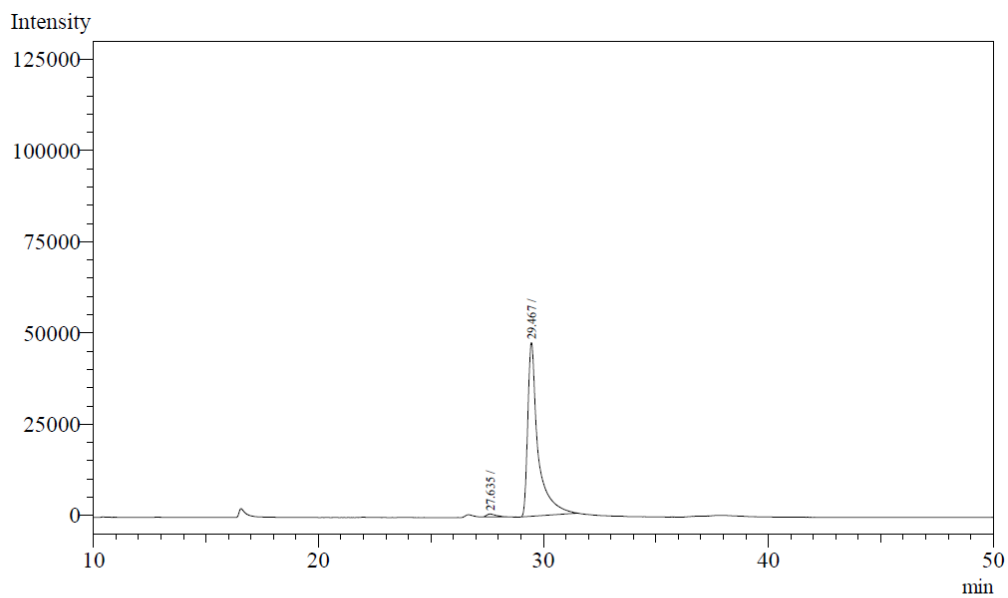

| Peak#        | Ret.Time | Area    | Height | Area%  | Height% |
|--------------|----------|---------|--------|--------|---------|
| 1            | 27.635   | 24653   | 813    | 1.61   | 1.68    |
| 2            | 29.467   | 1509342 | 47616  | 98.39  | 98.32   |
| <b>Total</b> |          | 1533995 | 48429  | 100.00 | 100.00  |

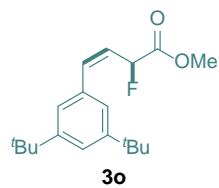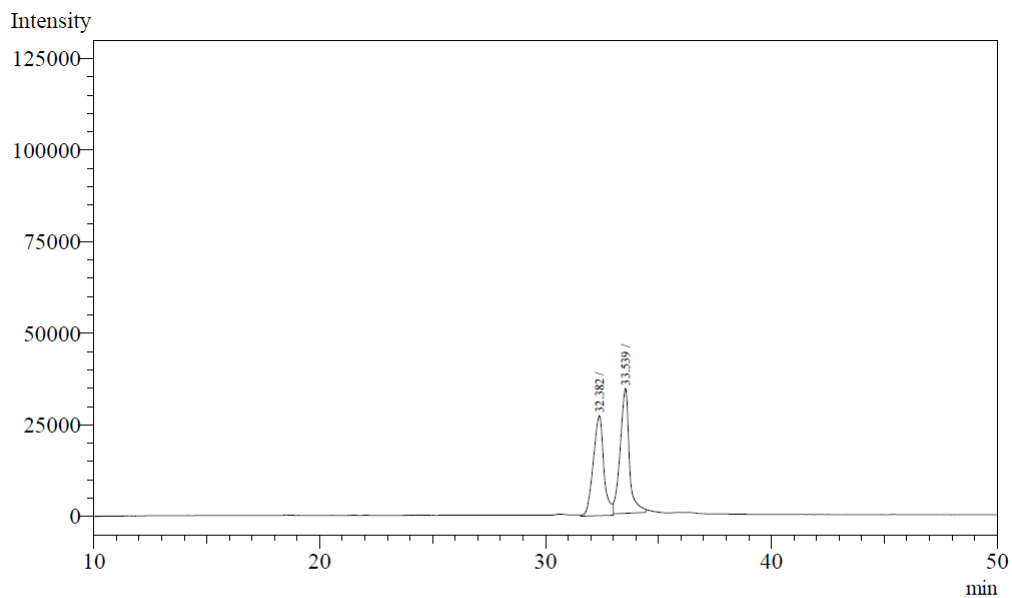

| Peak#        | Ret.Time | Area    | Height | Area%  | Height% |
|--------------|----------|---------|--------|--------|---------|
| 1            | 32.382   | 893846  | 27293  | 48.20  | 44.46   |
| 2            | 33.539   | 960747  | 34089  | 51.80  | 55.54   |
| <b>Total</b> |          | 1854593 | 61382  | 100.00 | 100.00  |

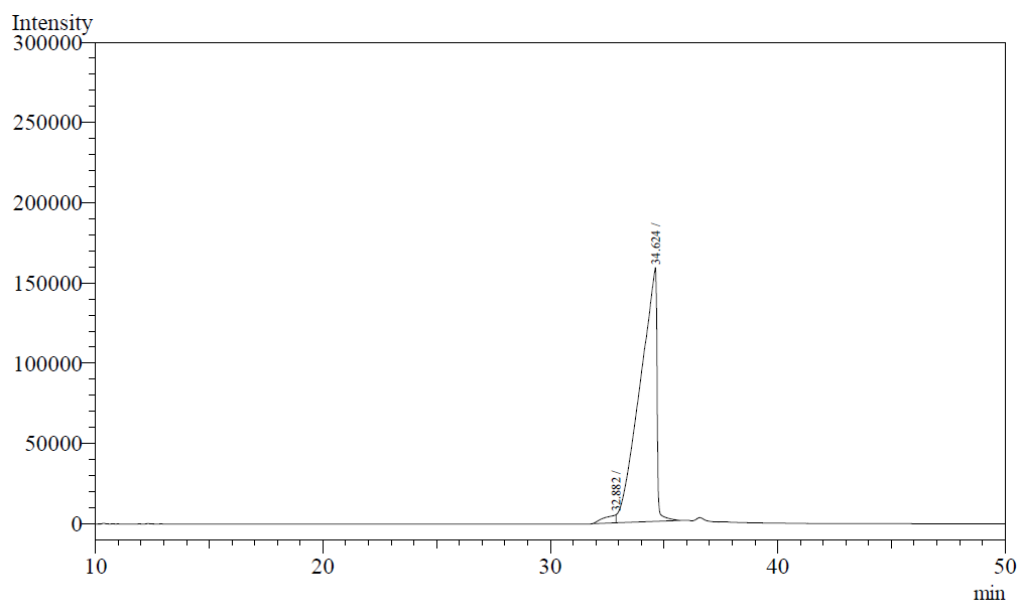

| Peak#        | Ret.Time | Area    | Height | Area%  | Height% |
|--------------|----------|---------|--------|--------|---------|
| 1            | 32.882   | 181406  | 5029   | 2.17   | 3.08    |
| 2            | 34.624   | 8183150 | 158214 | 97.83  | 96.92   |
| <b>Total</b> |          | 8364556 | 163243 | 100.00 | 100.00  |

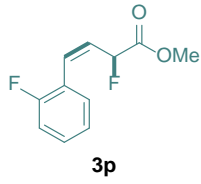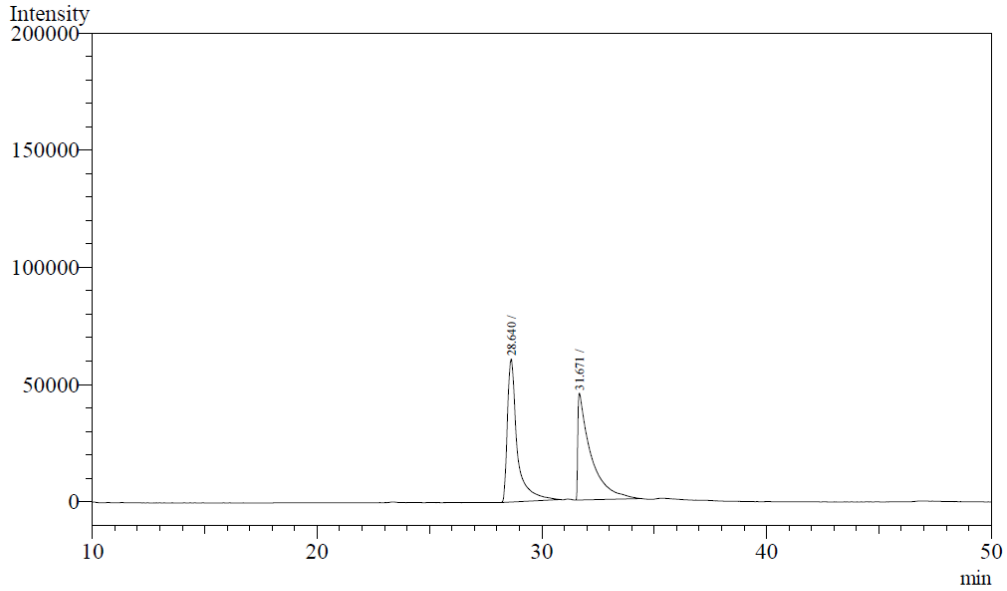

| Peak#        | Ret.Time | Area           | Height        | Area%         | Height%       |
|--------------|----------|----------------|---------------|---------------|---------------|
| 1            | 28.640   | 1853828        | 60950         | 50.41         | 57.23         |
| 2            | 31.671   | 1823642        | 45557         | 49.59         | 42.77         |
| <b>Total</b> |          | <b>3677470</b> | <b>106507</b> | <b>100.00</b> | <b>100.00</b> |

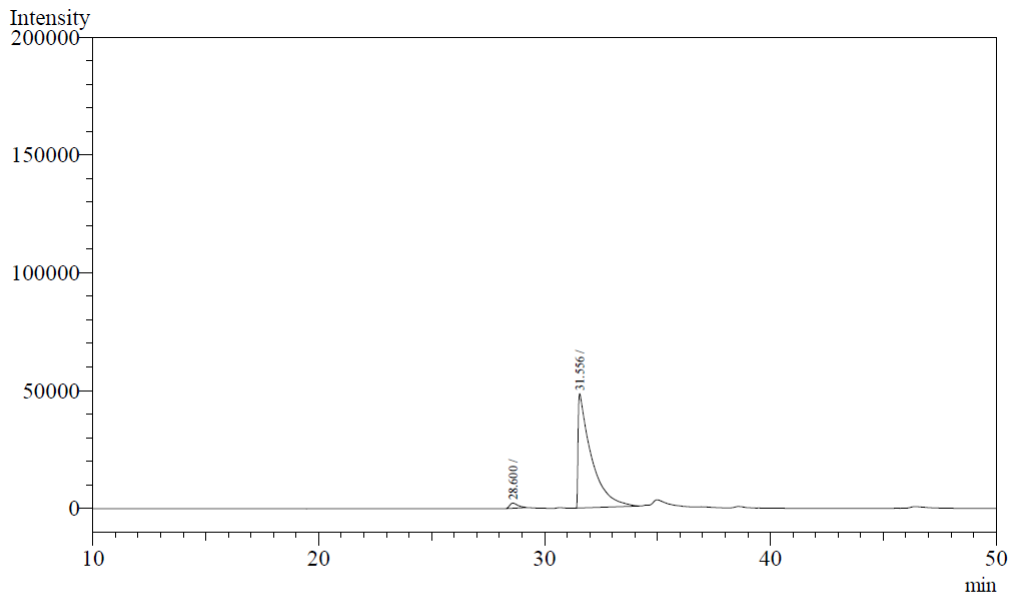

| Peak#        | Ret.Time | Area           | Height       | Area%         | Height%       |
|--------------|----------|----------------|--------------|---------------|---------------|
| 1            | 28.600   | 55175          | 2186         | 2.72          | 4.31          |
| 2            | 31.556   | 1975451        | 48546        | 97.28         | 95.69         |
| <b>Total</b> |          | <b>2030626</b> | <b>50732</b> | <b>100.00</b> | <b>100.00</b> |

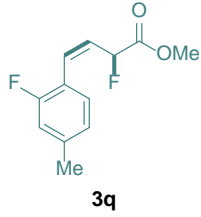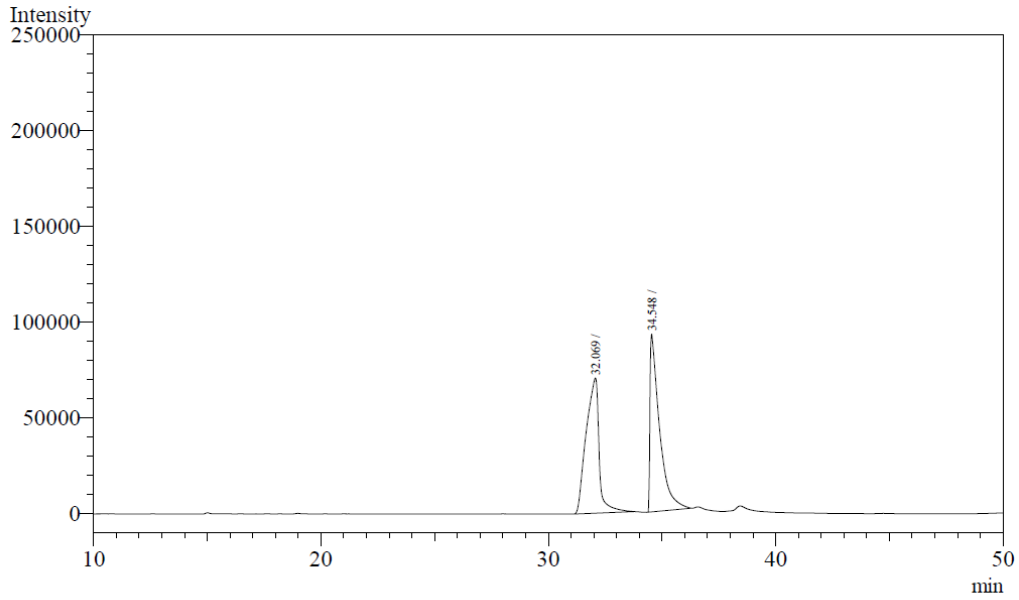

| Peak#        | Ret.Time | Area           | Height        | Area%         | Height%       |
|--------------|----------|----------------|---------------|---------------|---------------|
| 1            | 32.069   | 2803058        | 70559         | 50.92         | 43.20         |
| 2            | 34.548   | 2701487        | 92764         | 49.08         | 56.80         |
| <b>Total</b> |          | <b>5504545</b> | <b>163323</b> | <b>100.00</b> | <b>100.00</b> |

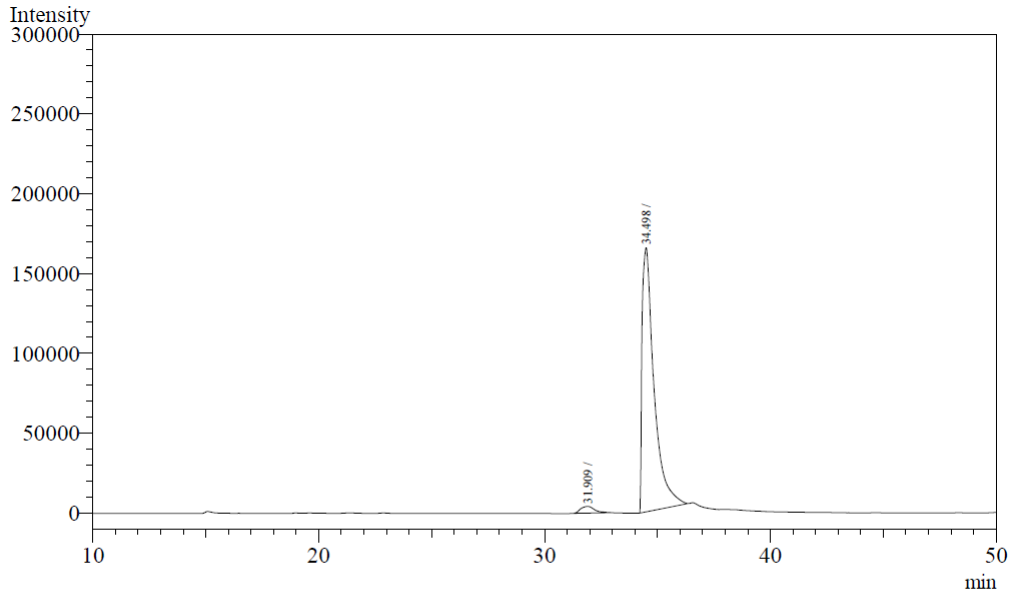

| Peak#        | Ret.Time | Area           | Height        | Area%         | Height%       |
|--------------|----------|----------------|---------------|---------------|---------------|
| 1            | 31.909   | 180743         | 4218          | 2.88          | 2.49          |
| 2            | 34.498   | 6101948        | 165475        | 97.12         | 97.51         |
| <b>Total</b> |          | <b>6282691</b> | <b>169693</b> | <b>100.00</b> | <b>100.00</b> |

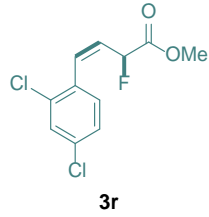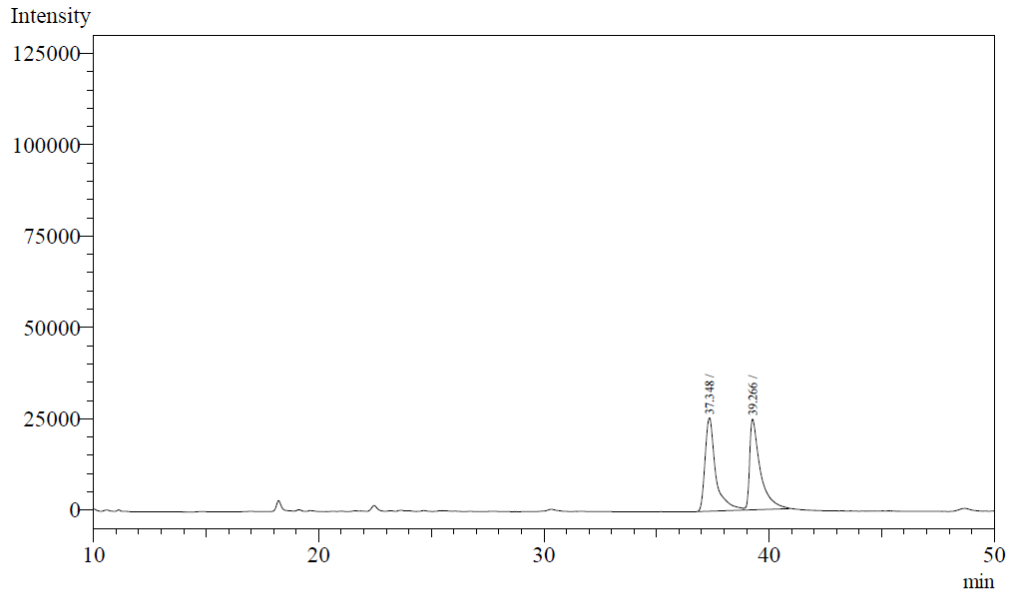

| Peak#        | Ret. Time | Area    | Height | Area%  | Height% |
|--------------|-----------|---------|--------|--------|---------|
| 1            | 37.348    | 846356  | 25534  | 50.98  | 50.70   |
| 2            | 39.266    | 813975  | 24832  | 49.02  | 49.30   |
| <b>Total</b> |           | 1660331 | 50366  | 100.00 | 100.00  |

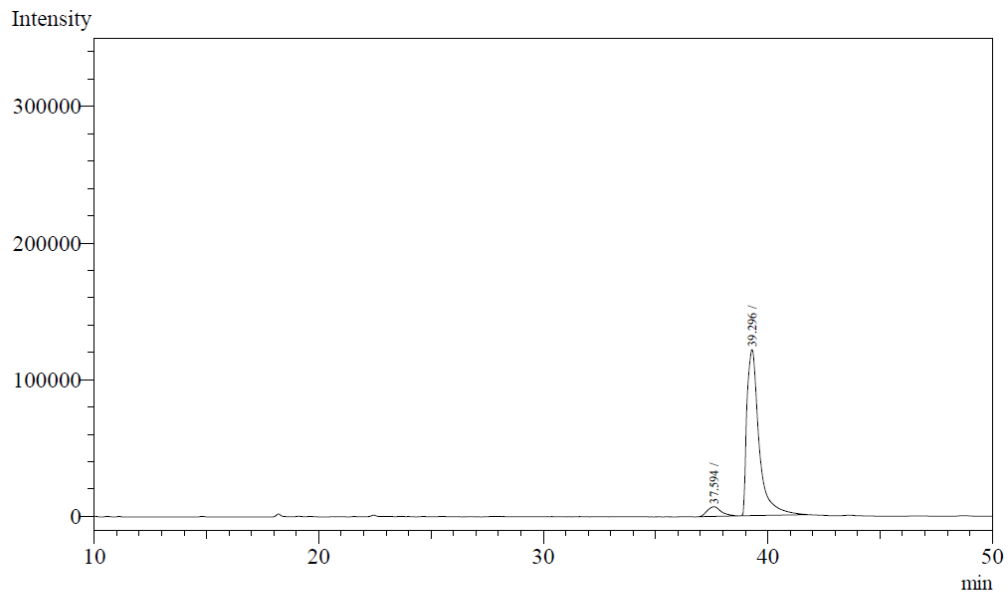

| Peak#        | Ret. Time | Area    | Height | Area%  | Height% |
|--------------|-----------|---------|--------|--------|---------|
| 1            | 37.594    | 305803  | 7129   | 6.24   | 5.54    |
| 2            | 39.296    | 4598129 | 121486 | 93.76  | 94.46   |
| <b>Total</b> |           | 4903932 | 128615 | 100.00 | 100.00  |



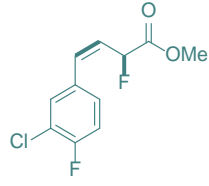

**3s**

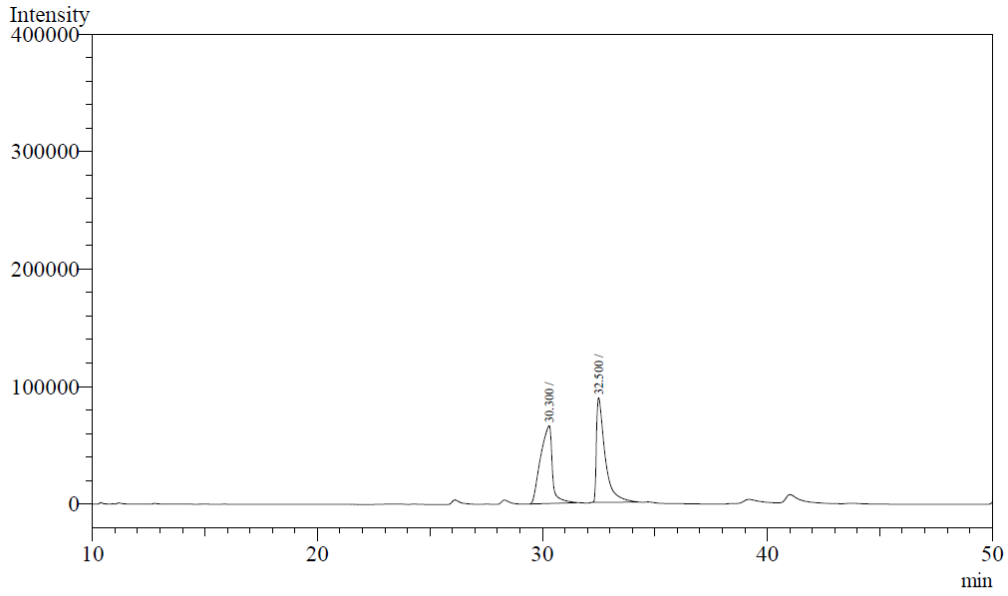

| Peak#        | Ret.Time | Area           | Height        | Area%         | Height%       |
|--------------|----------|----------------|---------------|---------------|---------------|
| 1            | 30.300   | 2415094        | 66249         | 50.38         | 42.68         |
| 2            | 32.500   | 2378479        | 88963         | 49.62         | 57.32         |
| <b>Total</b> |          | <b>4793573</b> | <b>155212</b> | <b>100.00</b> | <b>100.00</b> |

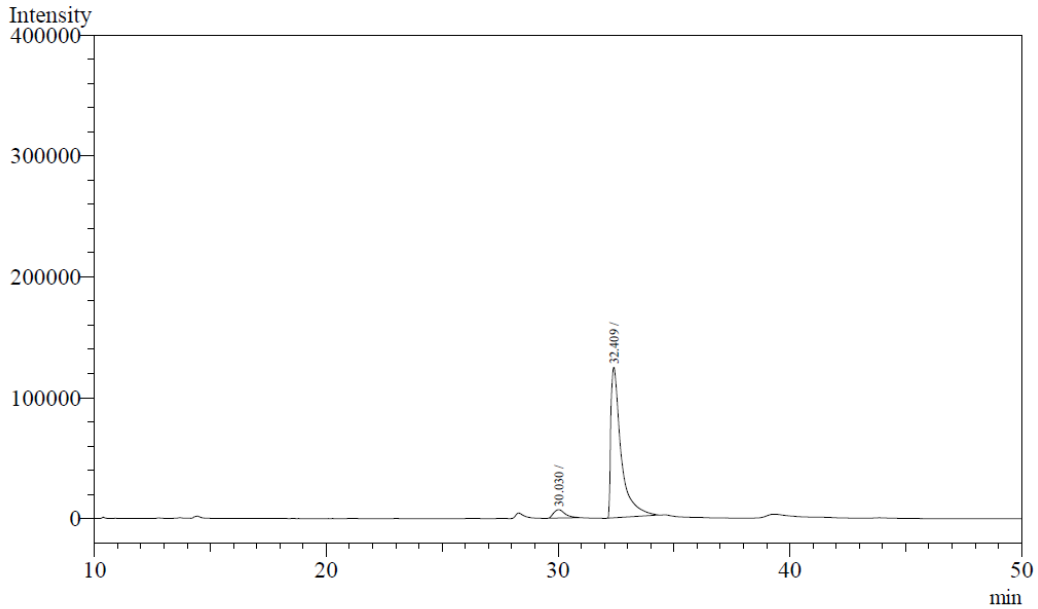

| Peak#        | Ret.Time | Area           | Height        | Area%         | Height%       |
|--------------|----------|----------------|---------------|---------------|---------------|
| 1            | 30.030   | 235802         | 6871          | 5.79          | 5.23          |
| 2            | 32.409   | 3836632        | 124537        | 94.21         | 94.77         |
| <b>Total</b> |          | <b>4072434</b> | <b>131408</b> | <b>100.00</b> | <b>100.00</b> |

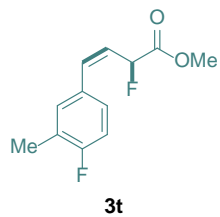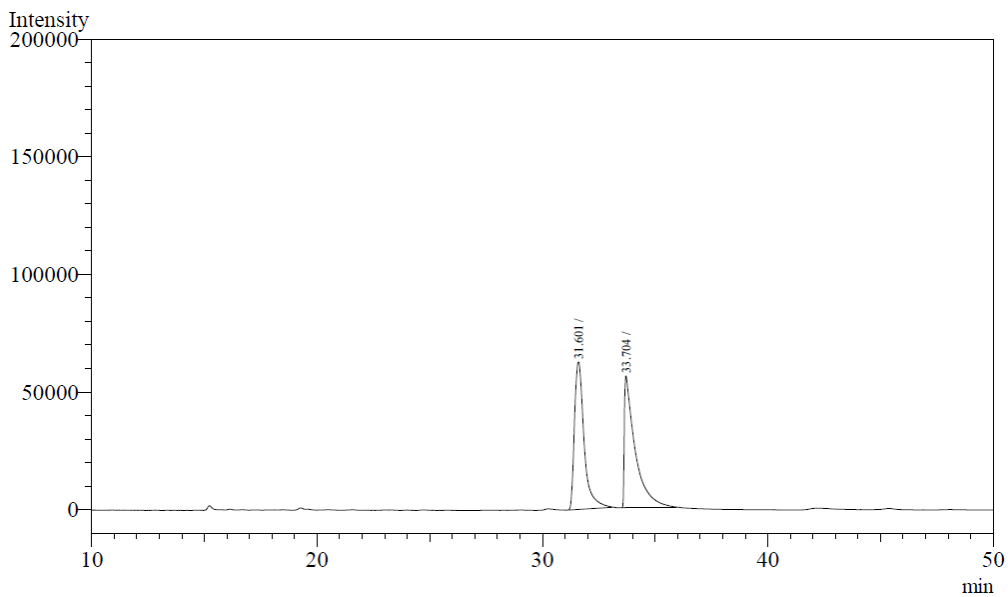

| Peak#        | Ret.Time | Area    | Height | Area%  | Height% |
|--------------|----------|---------|--------|--------|---------|
| 1            | 31.601   | 1870805 | 62661  | 50.18  | 52.83   |
| 2            | 33.704   | 1857484 | 55938  | 49.82  | 47.17   |
| <b>Total</b> |          | 3728289 | 118599 | 100.00 | 100.00  |

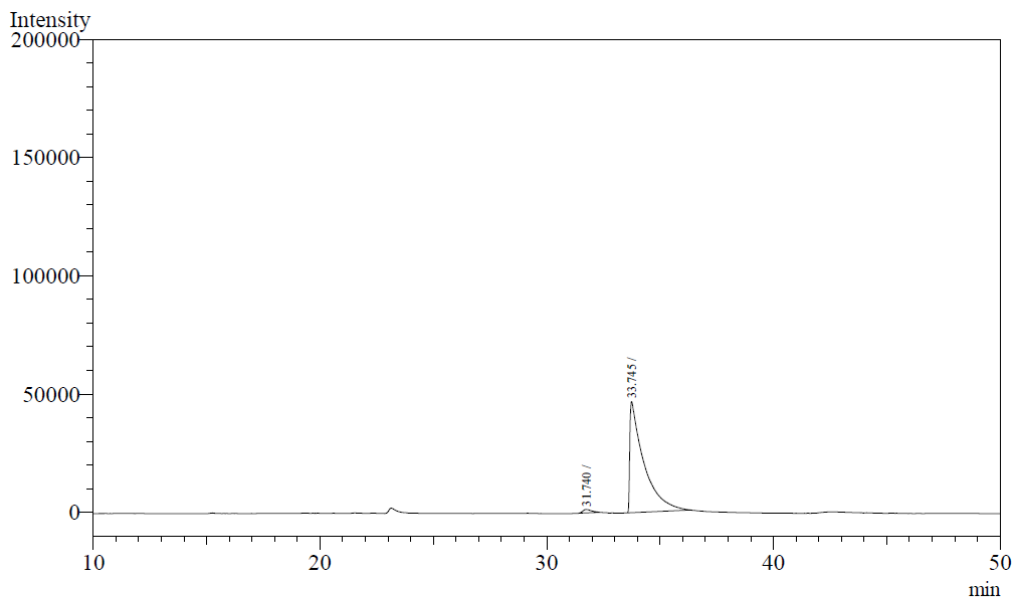

| Peak#        | Ret.Time | Area    | Height | Area%  | Height% |
|--------------|----------|---------|--------|--------|---------|
| 1            | 31.740   | 37837   | 1437   | 1.84   | 2.97    |
| 2            | 33.745   | 2016217 | 46961  | 98.16  | 97.03   |
| <b>Total</b> |          | 2054054 | 48398  | 100.00 | 100.00  |

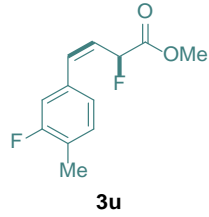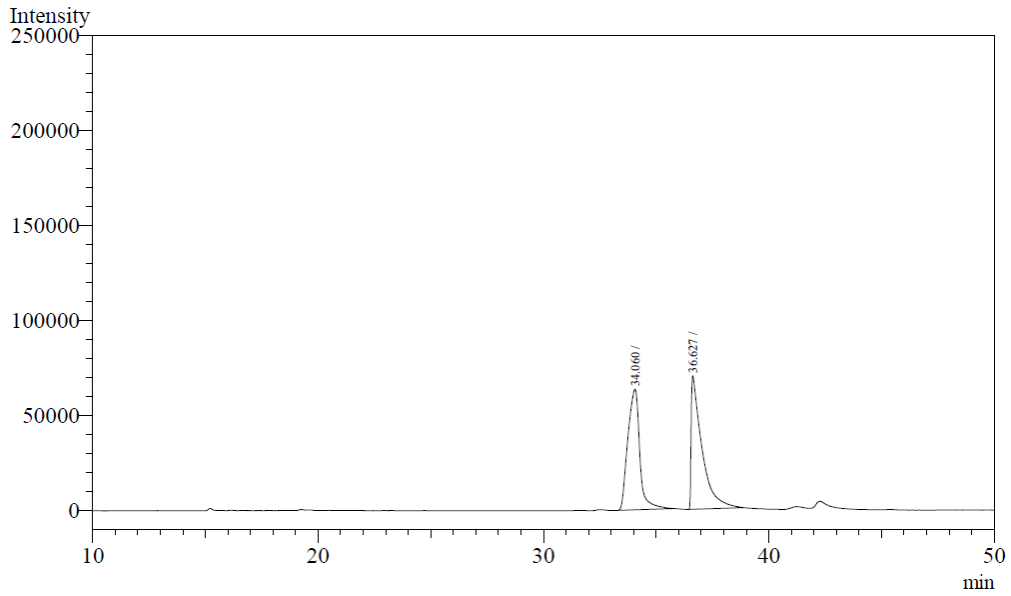

| Peak#        | Ret. Time | Area    | Height | Area%  | Height% |
|--------------|-----------|---------|--------|--------|---------|
| 1            | 34.060    | 2339469 | 63447  | 50.09  | 47.44   |
| 2            | 36.627    | 2330899 | 70298  | 49.91  | 52.56   |
| <b>Total</b> |           | 4670368 | 133745 | 100.00 | 100.00  |

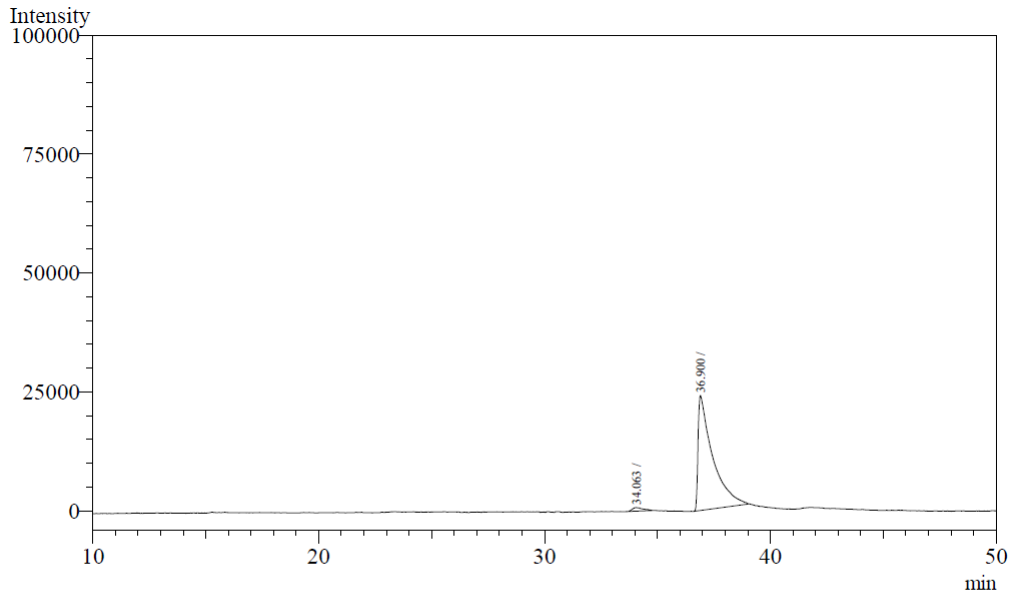

| Peak#        | Ret. Time | Area    | Height | Area%  | Height% |
|--------------|-----------|---------|--------|--------|---------|
| 1            | 34.063    | 24238   | 756    | 2.20   | 3.04    |
| 2            | 36.900    | 1078144 | 24143  | 97.80  | 96.96   |
| <b>Total</b> |           | 1102382 | 24899  | 100.00 | 100.00  |

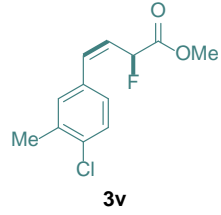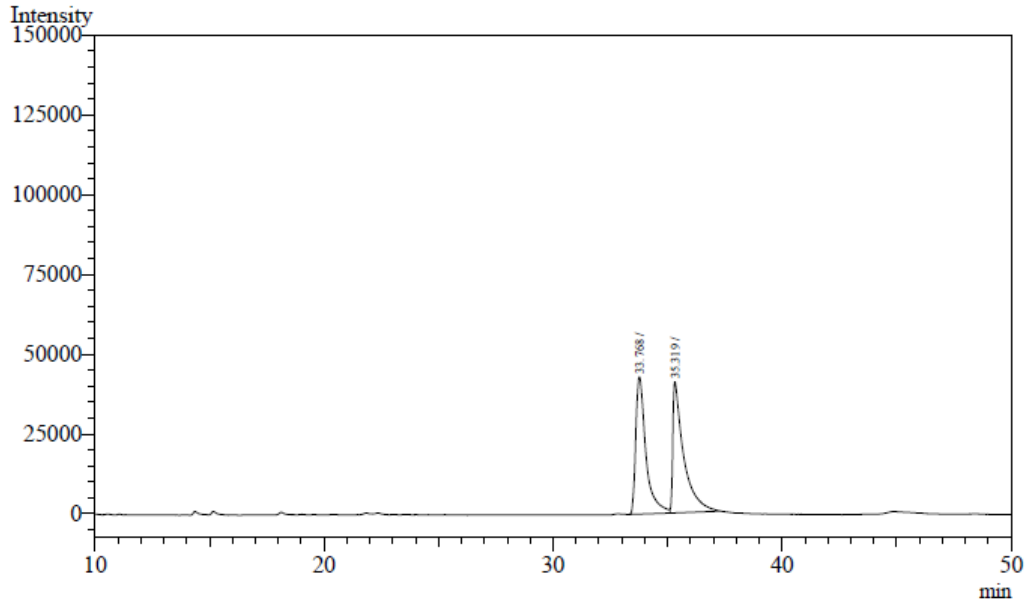

| Peak#        | Ret. Time | Area    | Height | Area%  | Height% |
|--------------|-----------|---------|--------|--------|---------|
| 1            | 33.768    | 1326262 | 42994  | 49.47  | 51.17   |
| 2            | 35.319    | 1354559 | 41026  | 50.53  | 48.83   |
| <b>Total</b> |           | 2680821 | 84020  | 100.00 | 100.00  |

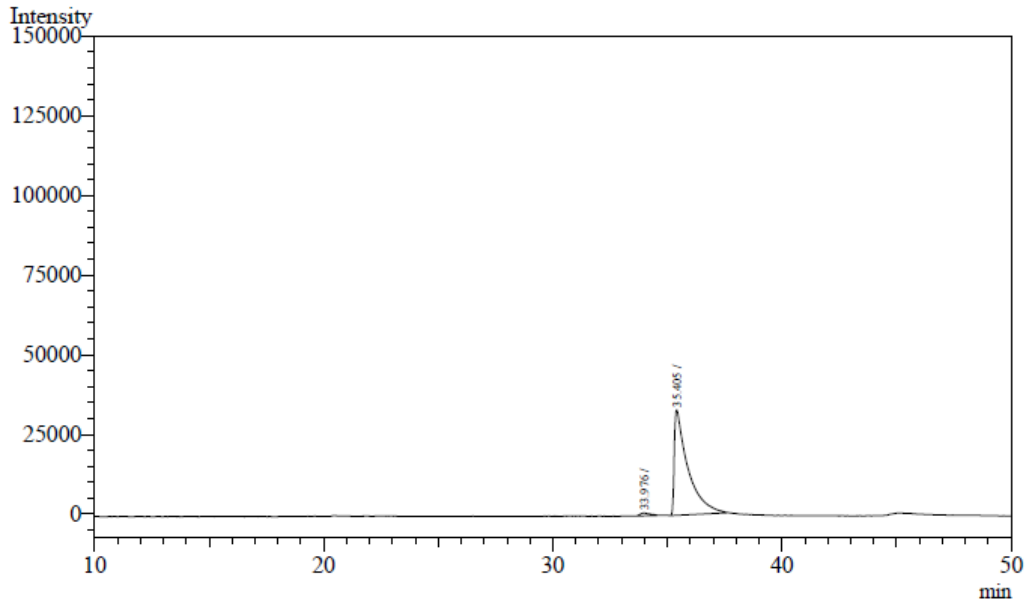

| Peak#        | Ret. Time | Area    | Height | Area%  | Height% |
|--------------|-----------|---------|--------|--------|---------|
| 1            | 33.976    | 26561   | 891    | 1.92   | 2.63    |
| 2            | 35.405    | 1359293 | 33036  | 98.08  | 97.37   |
| <b>Total</b> |           | 1385854 | 33927  | 100.00 | 100.00  |

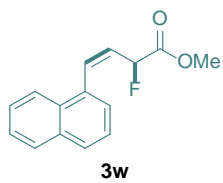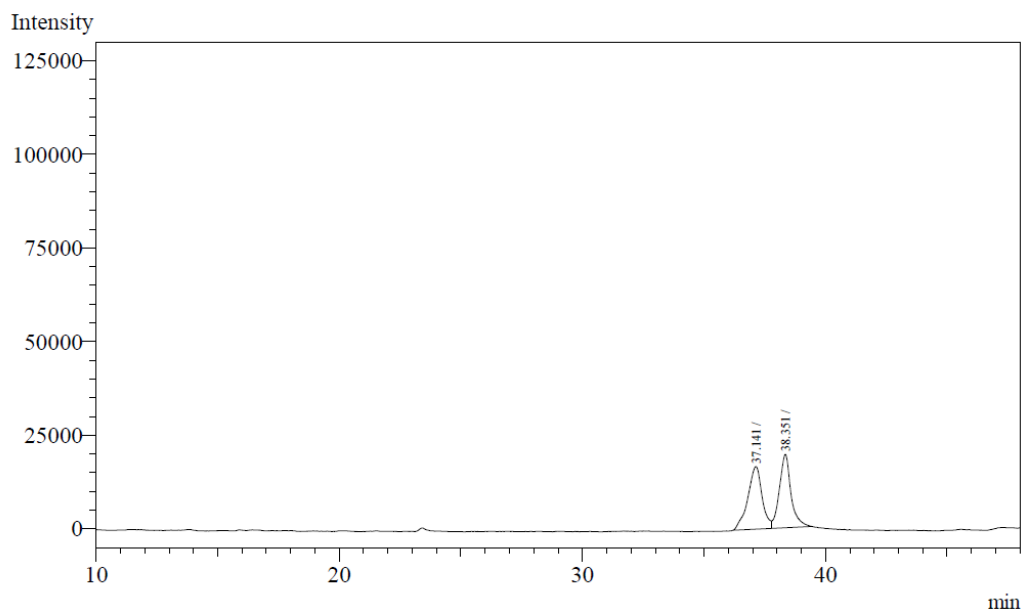

| Peak#        | Ret. Time | Area    | Height | Area%  | Height% |
|--------------|-----------|---------|--------|--------|---------|
| 1            | 37.141    | 679531  | 16692  | 50.99  | 46.03   |
| 2            | 38.351    | 653273  | 19574  | 49.01  | 53.97   |
| <b>Total</b> |           | 1332804 | 36266  | 100.00 | 100.00  |

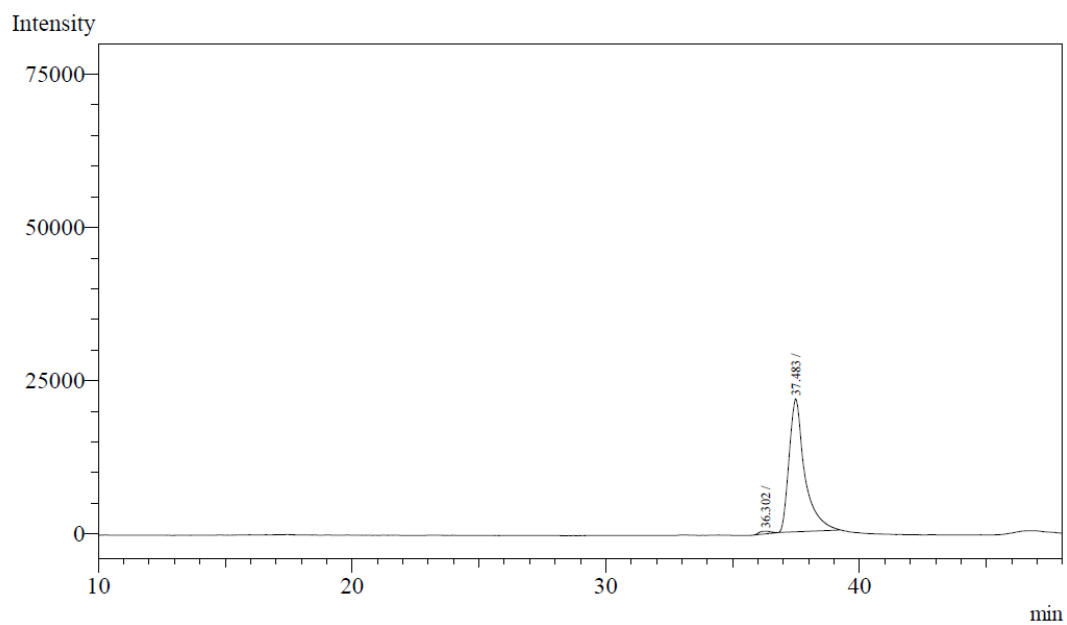

| Peak#        | Ret. Time | Area   | Height | Area%  | Height% |
|--------------|-----------|--------|--------|--------|---------|
| 1            | 36.302    | 13568  | 424    | 1.44   | 1.92    |
| 2            | 37.483    | 928689 | 21693  | 98.56  | 98.08   |
| <b>Total</b> |           | 942257 | 22117  | 100.00 | 100.00  |

## HPLC spectra

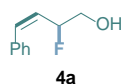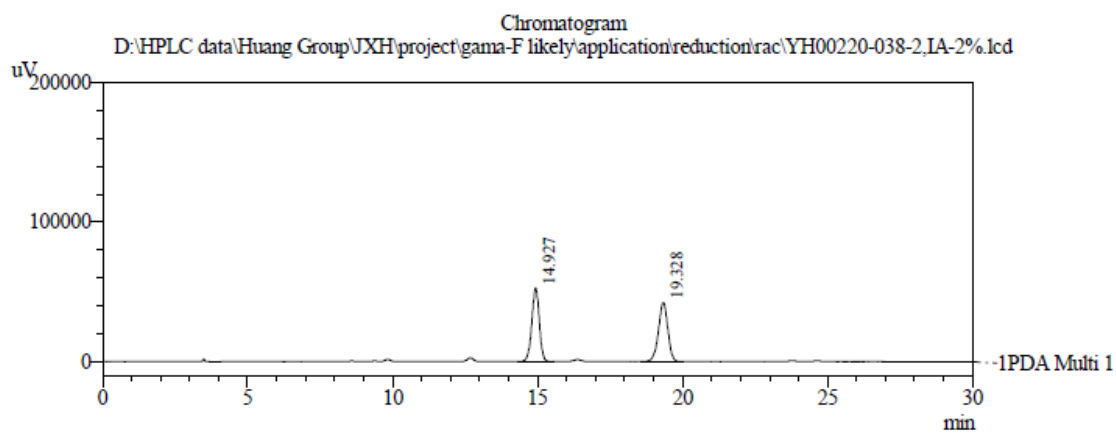

1 PDA Multi 1 / 254nm 4nm

PeakTable

Ch1 254nm 4nm

| Peak# | Ret. Time | Area    | Height | Area %  | Height % |
|-------|-----------|---------|--------|---------|----------|
| 1     | 14.927    | 951537  | 52841  | 49.897  | 55.578   |
| 2     | 19.328    | 955465  | 42234  | 50.103  | 44.422   |
| Total |           | 1907002 | 95075  | 100.000 | 100.000  |

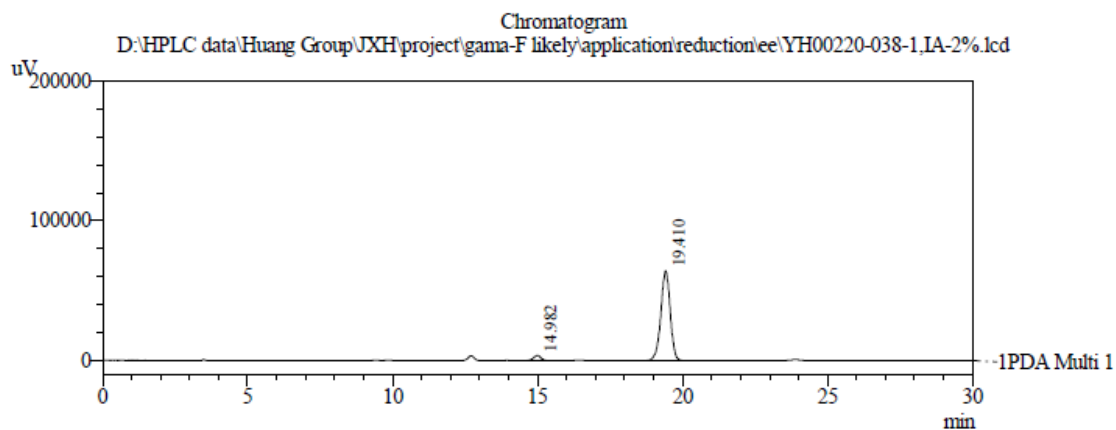

1 PDA Multi 1 / 254nm 4nm

PeakTable

Ch1 254nm 4nm

| Peak# | Ret. Time | Area    | Height | Area %  | Height % |
|-------|-----------|---------|--------|---------|----------|
| 1     | 14.982    | 64423   | 3701   | 4.272   | 5.440    |
| 2     | 19.410    | 1443504 | 64337  | 95.728  | 94.560   |
| Total |           | 1507927 | 68038  | 100.000 | 100.000  |

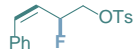

4b

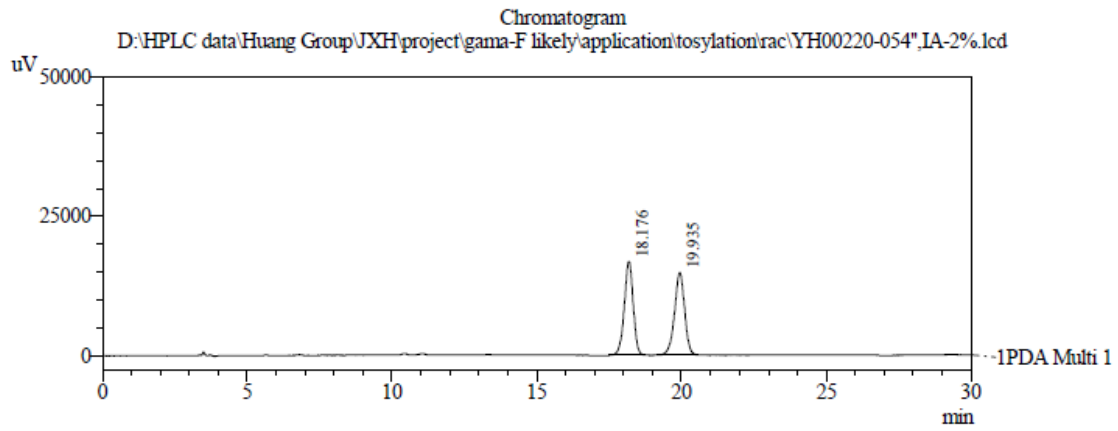

PeakTable

PDA Ch1 254nm 4mm

| Peak# | Ret. Time | Area   | Height | Area %  | Height % |
|-------|-----------|--------|--------|---------|----------|
| 1     | 18.176    | 359610 | 16827  | 49.873  | 53.221   |
| 2     | 19.935    | 361444 | 14790  | 50.127  | 46.779   |
| Total |           | 721054 | 31618  | 100.000 | 100.000  |

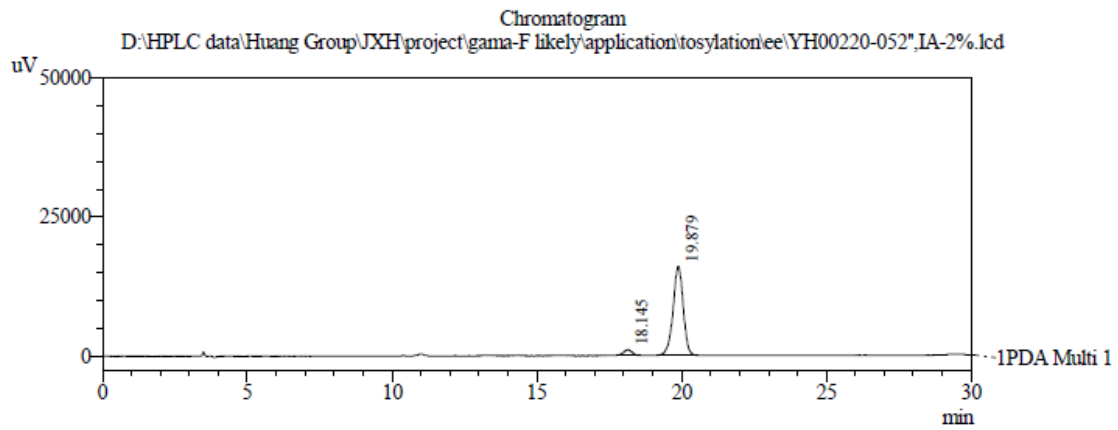

PeakTable

PDA Ch1 254nm 4mm

| Peak# | Ret. Time | Area   | Height | Area %  | Height % |
|-------|-----------|--------|--------|---------|----------|
| 1     | 18.145    | 19588  | 995    | 4.764   | 5.836    |
| 2     | 19.879    | 391567 | 16046  | 95.236  | 94.164   |
| Total |           | 411155 | 17041  | 100.000 | 100.000  |

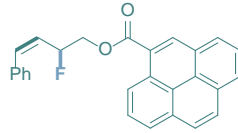

4c

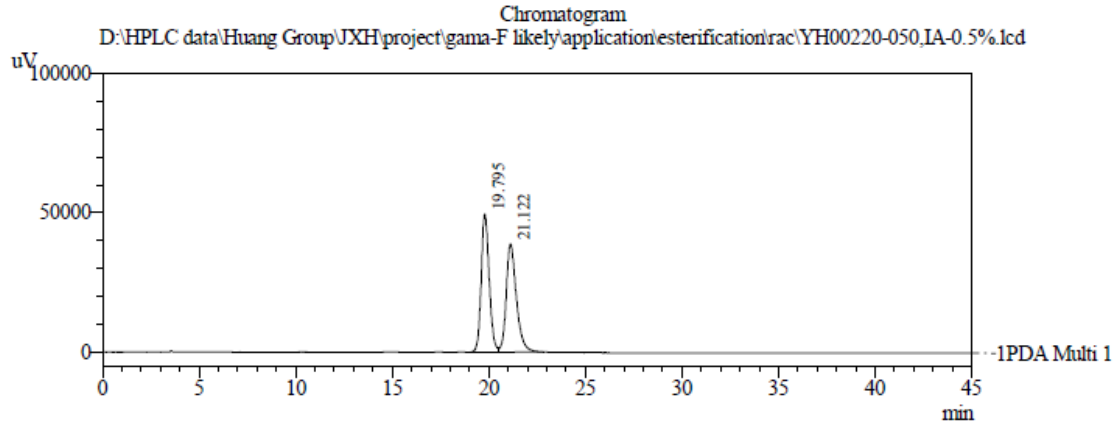

1 PDA Multi 1 / 254nm 4nm

PeakTable

PDA Ch1 254nm 4nm

| Peak# | Ret. Time | Area    | Height | Area %  | Height % |
|-------|-----------|---------|--------|---------|----------|
| 1     | 19.795    | 1417953 | 49590  | 49.912  | 56.118   |
| 2     | 21.122    | 1422931 | 38778  | 50.088  | 43.882   |
| Total |           | 2840884 | 88367  | 100.000 | 100.000  |

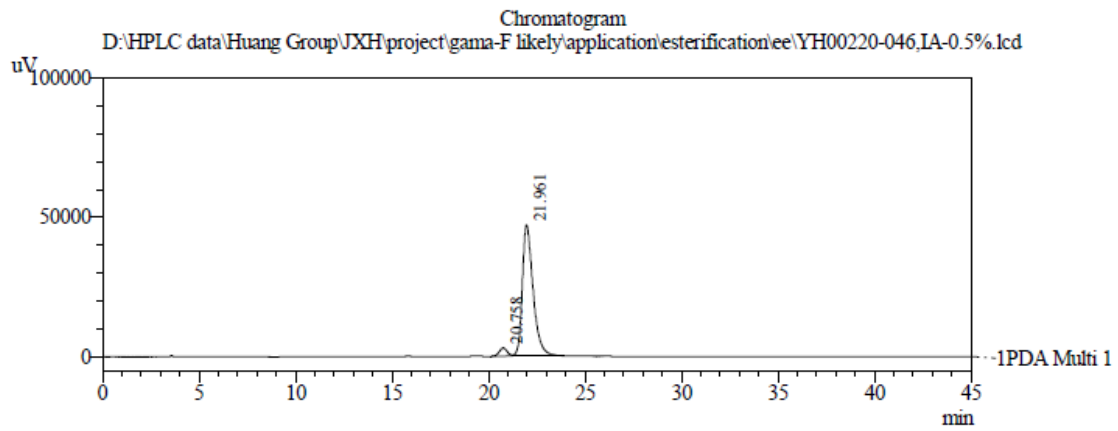

1 PDA Multi 1 / 254nm 4nm

PeakTable

PDA Ch1 254nm 4nm

| Peak# | Ret. Time | Area    | Height | Area %  | Height % |
|-------|-----------|---------|--------|---------|----------|
| 1     | 20.758    | 83414   | 2932   | 4.373   | 5.864    |
| 2     | 21.961    | 1824043 | 47067  | 95.627  | 94.136   |
| Total |           | 1907457 | 49999  | 100.000 | 100.000  |



# NMR spectra

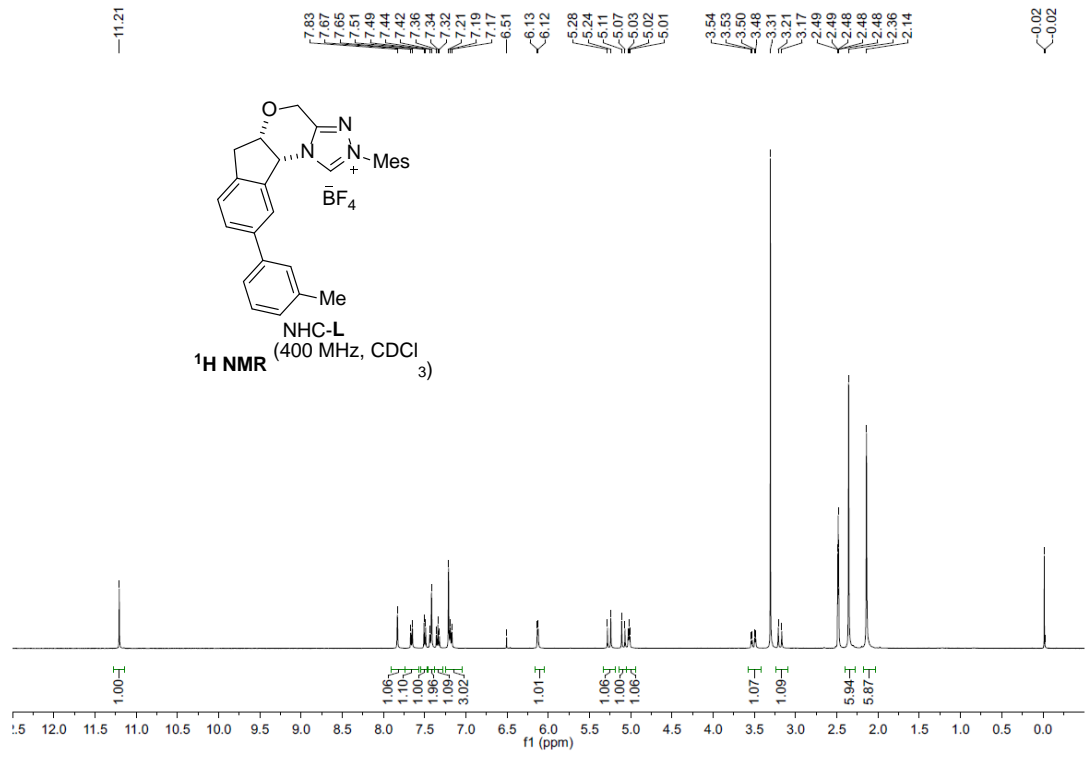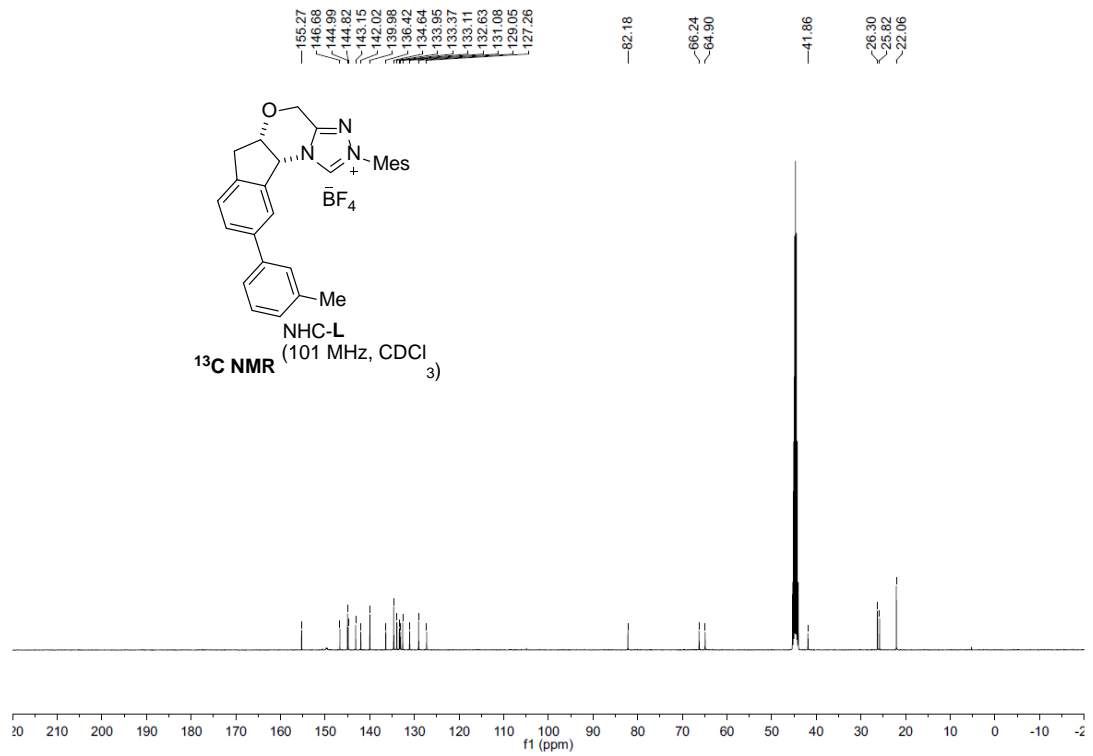

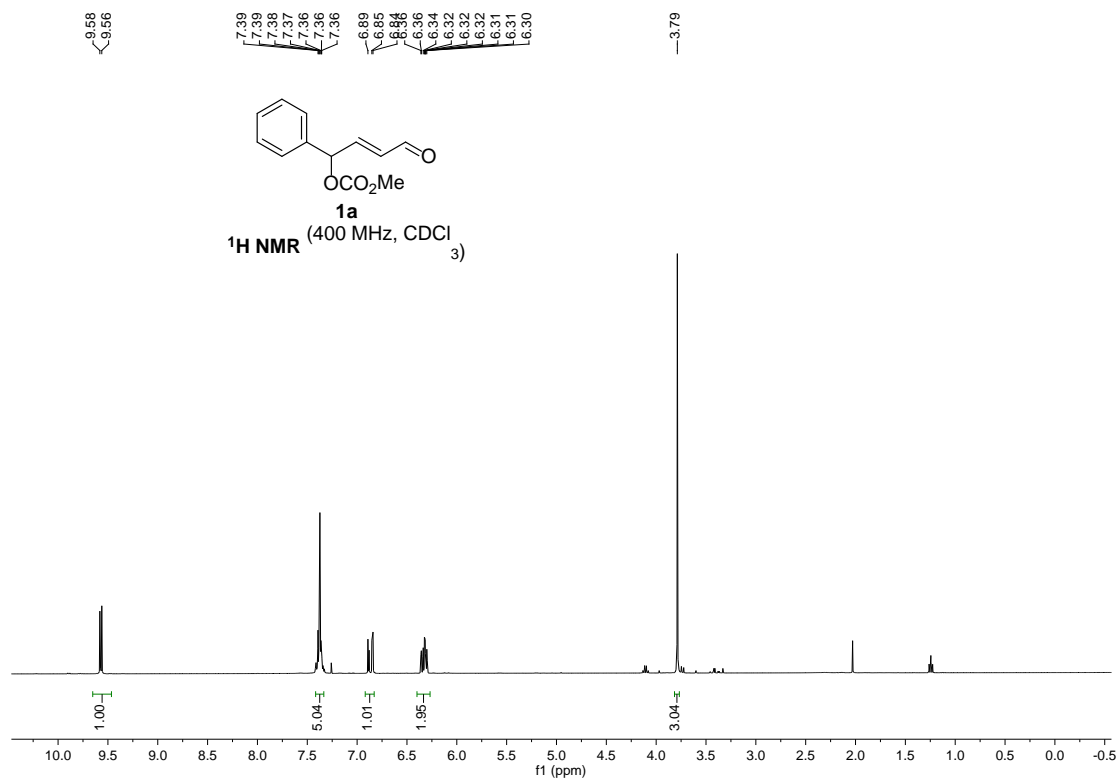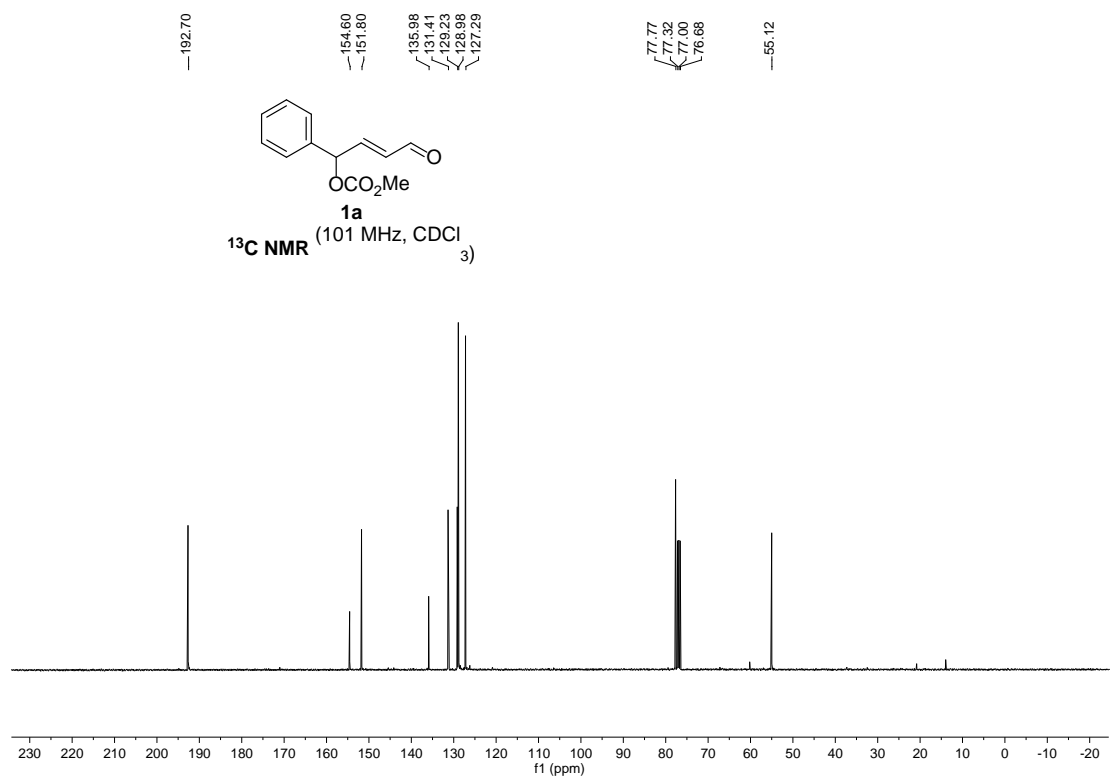

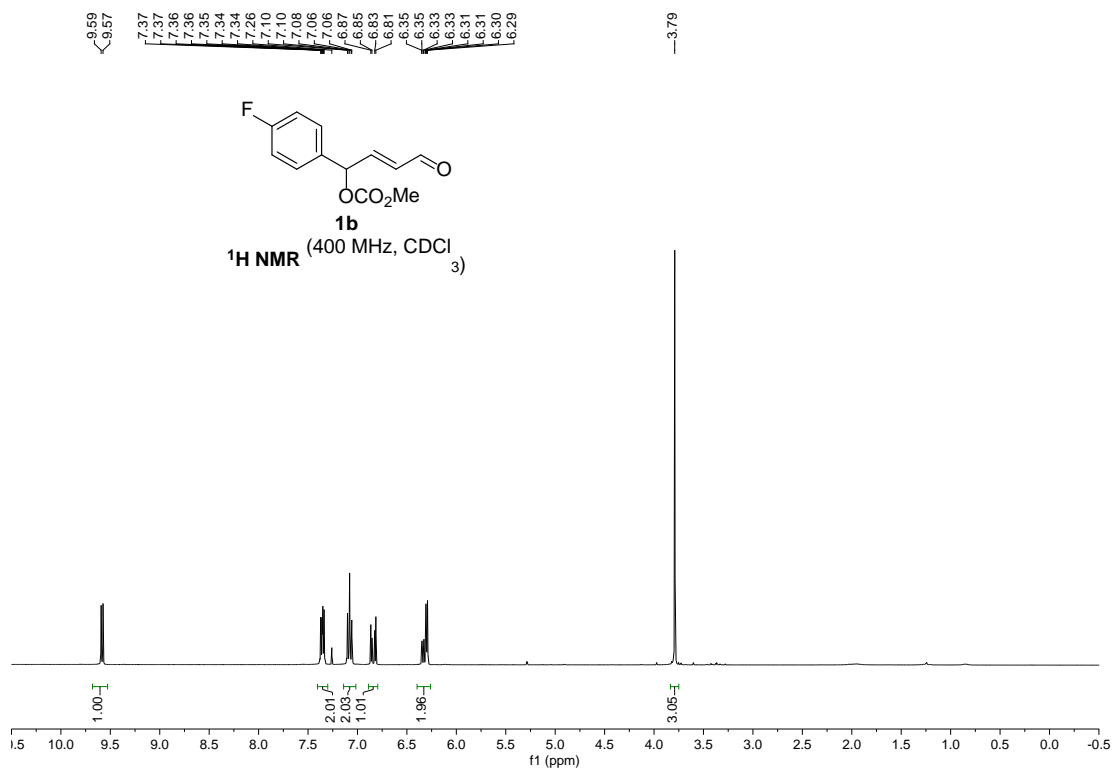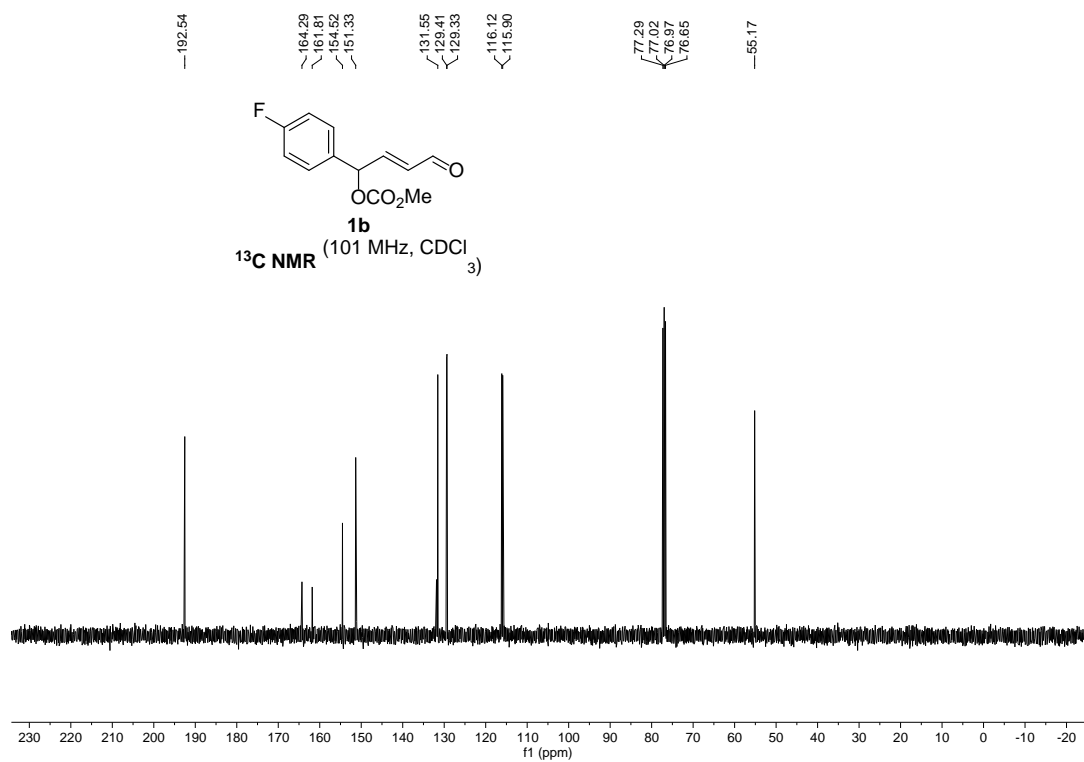

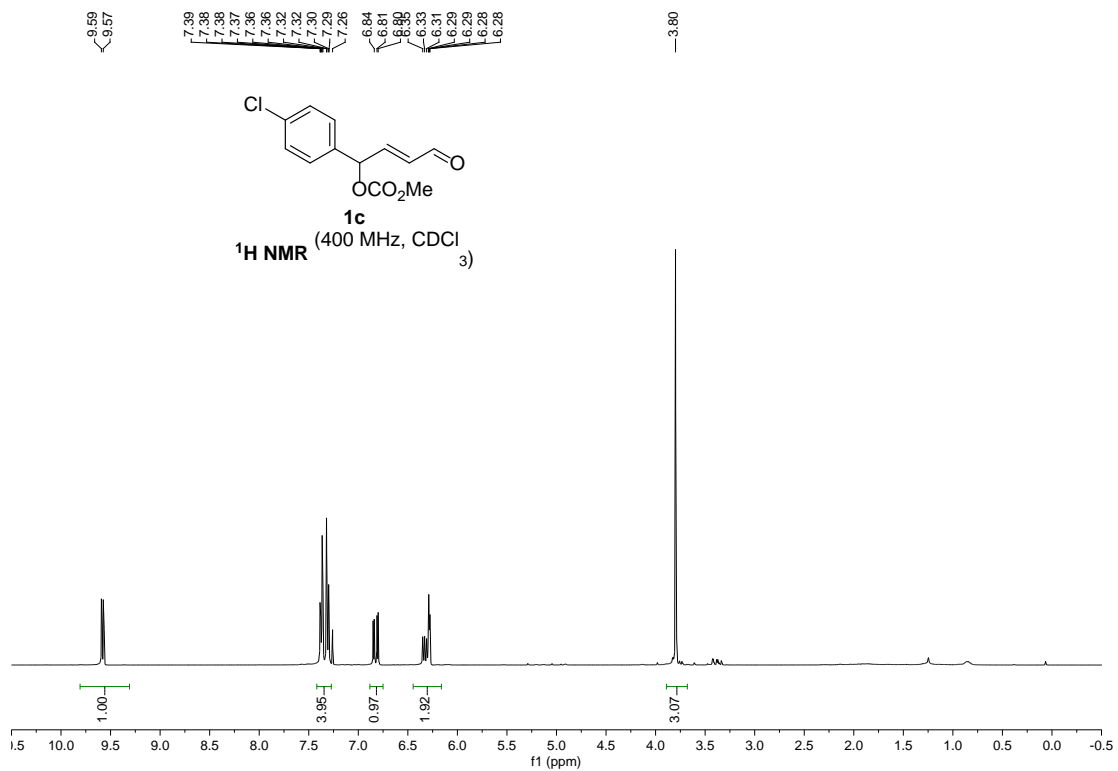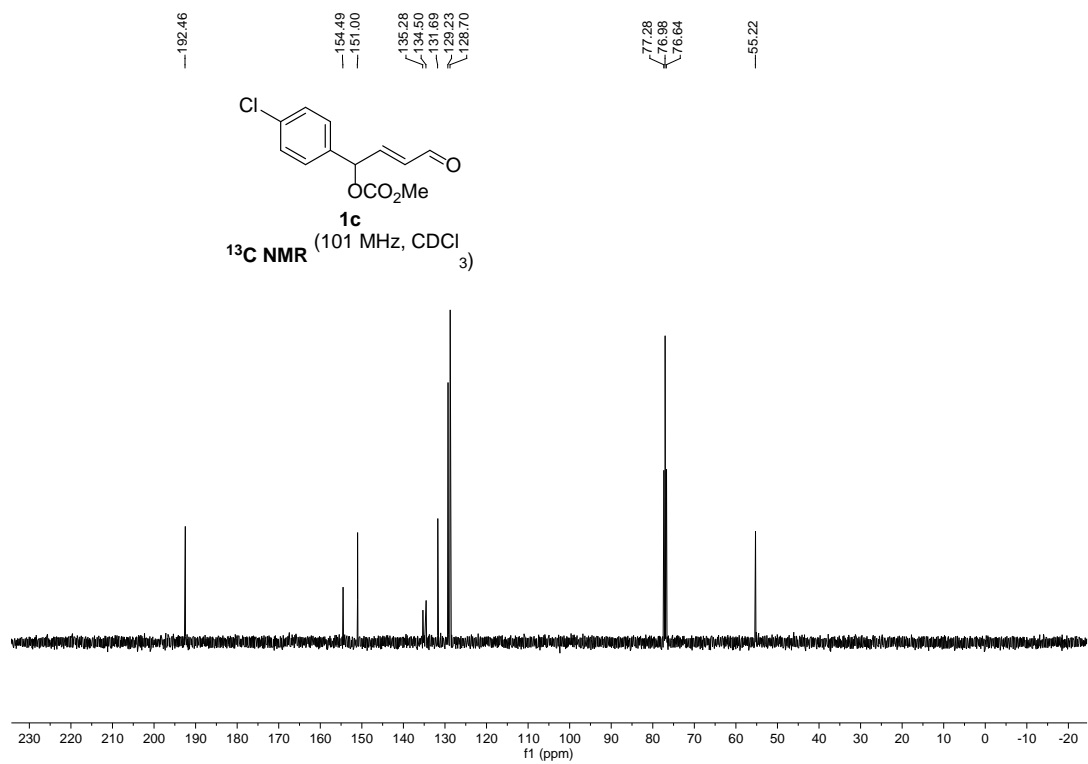

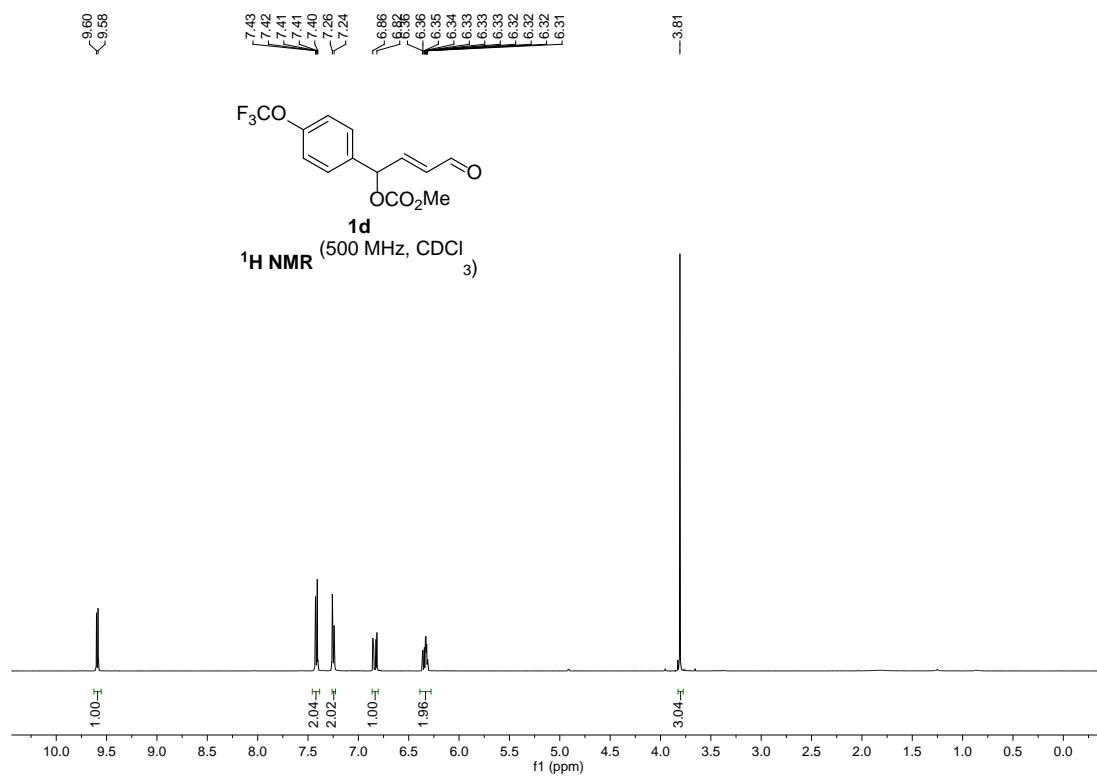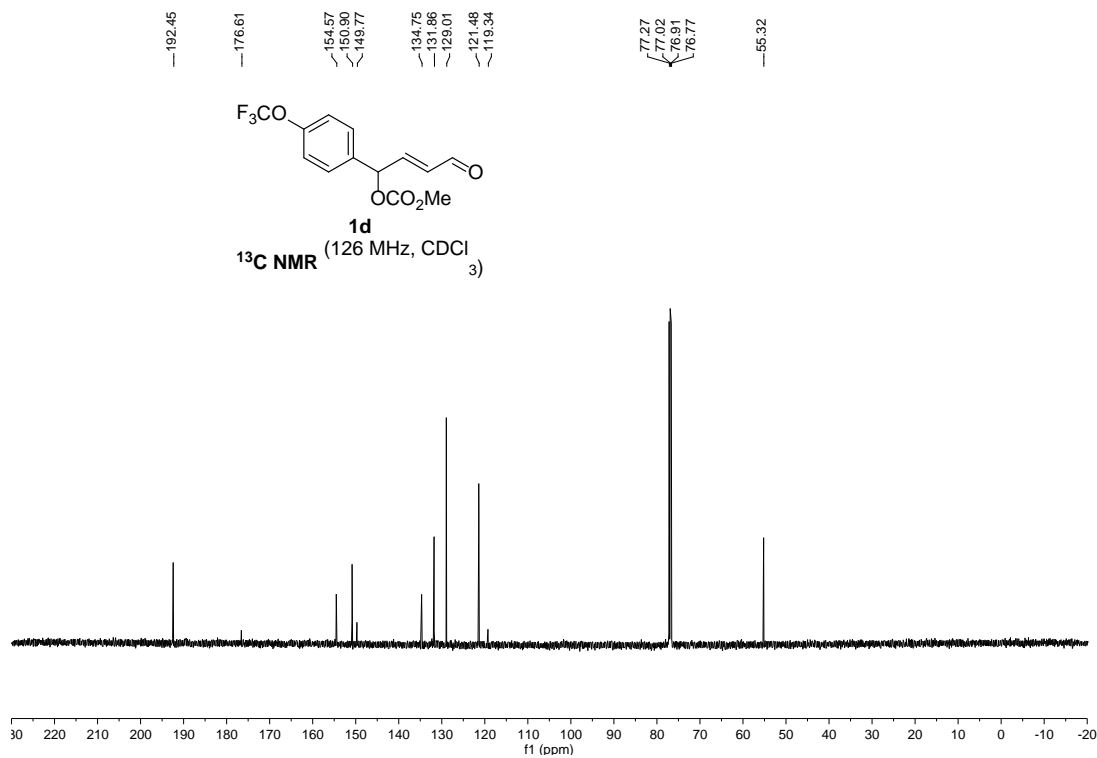

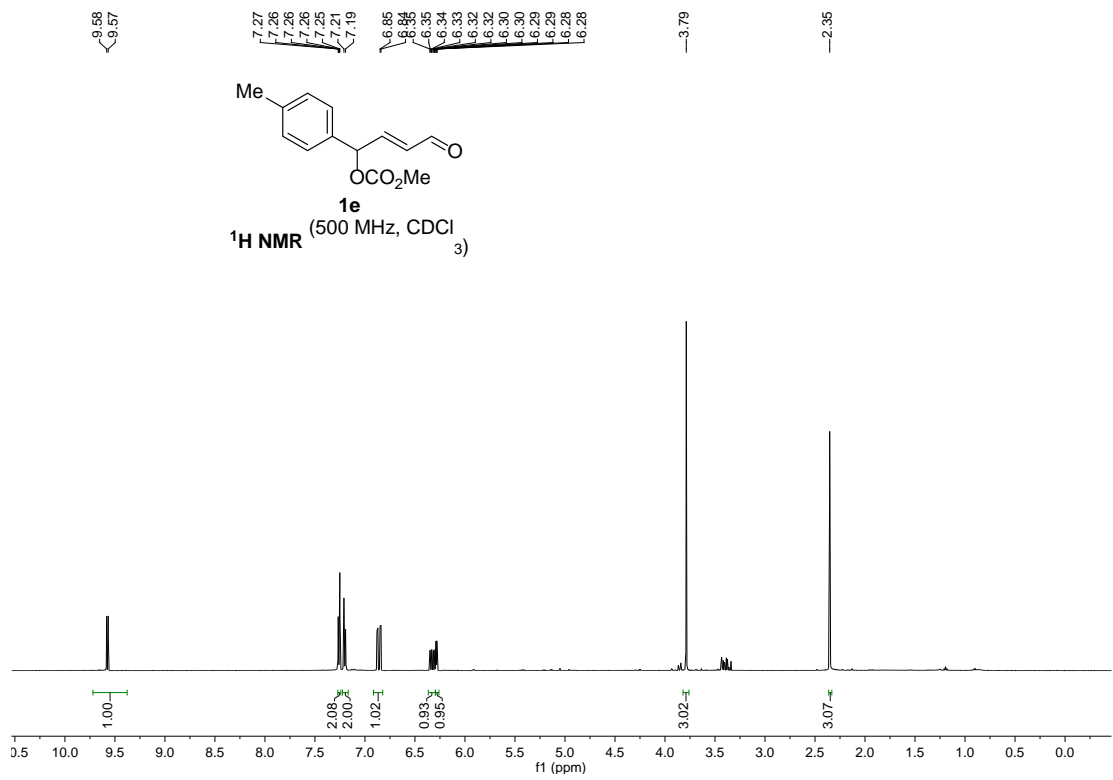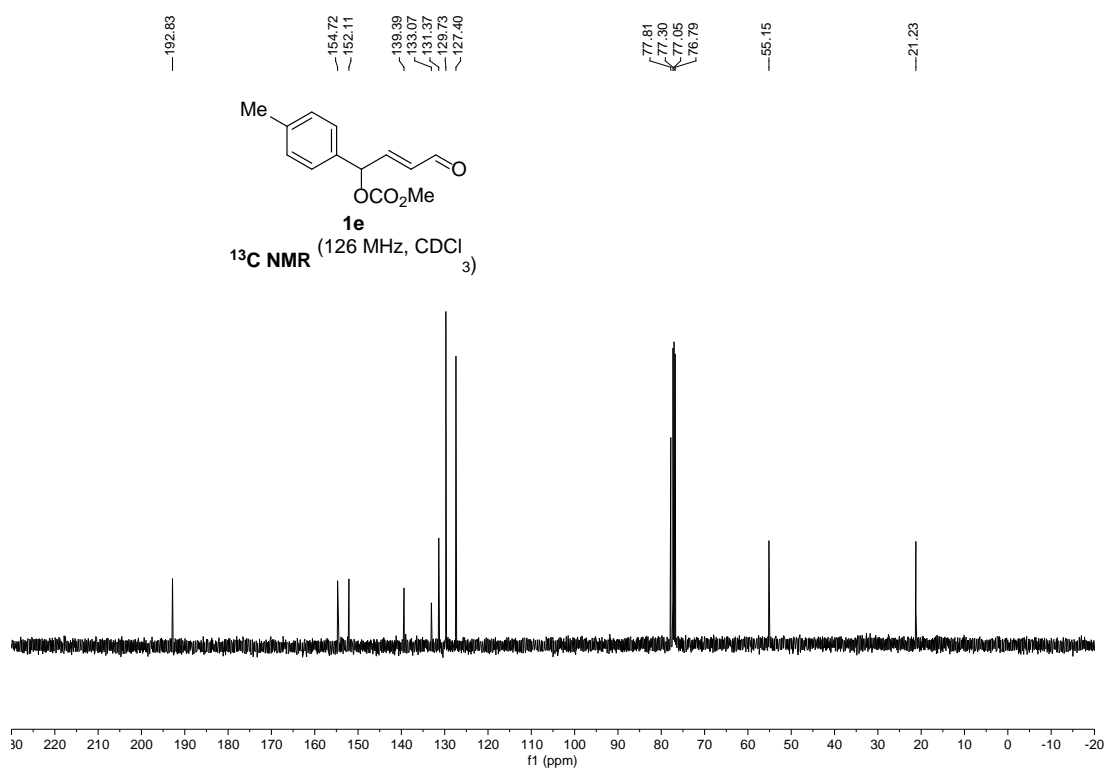

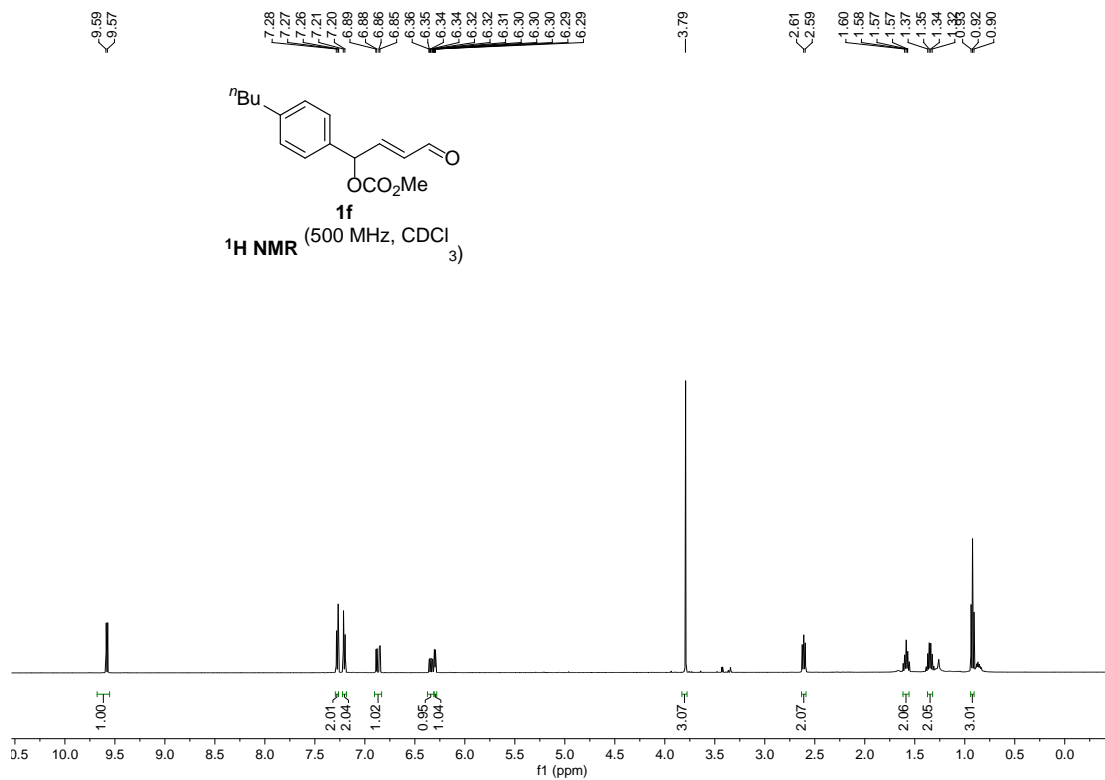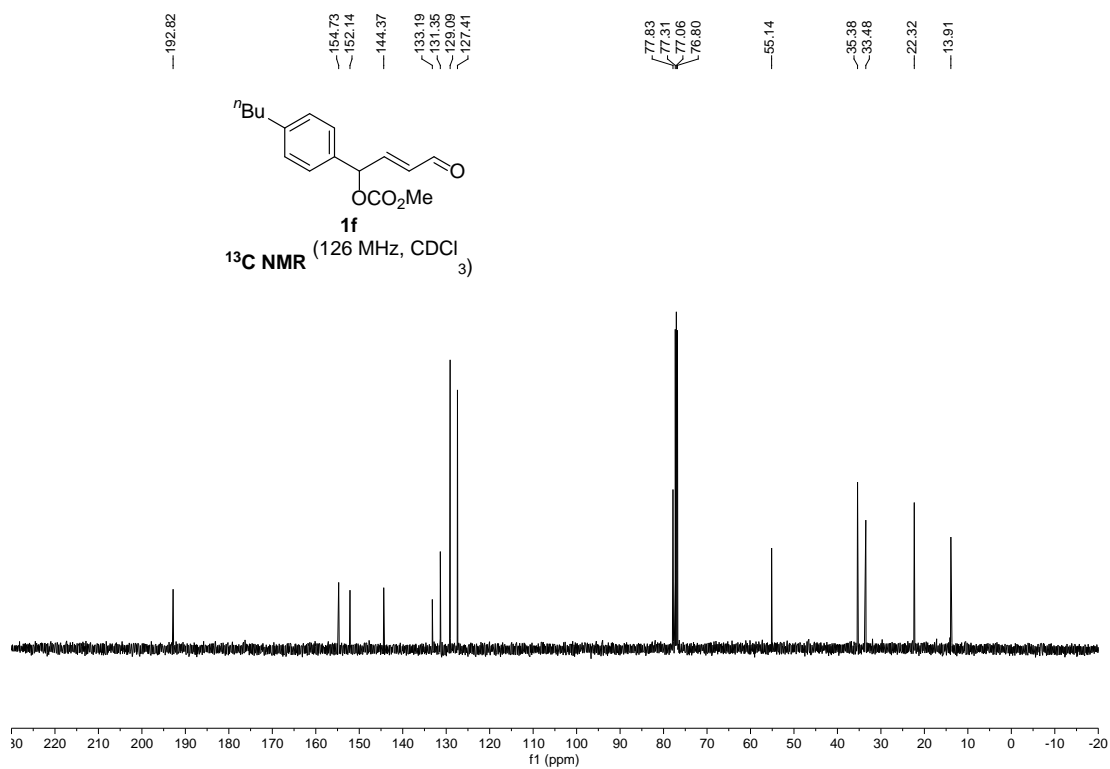

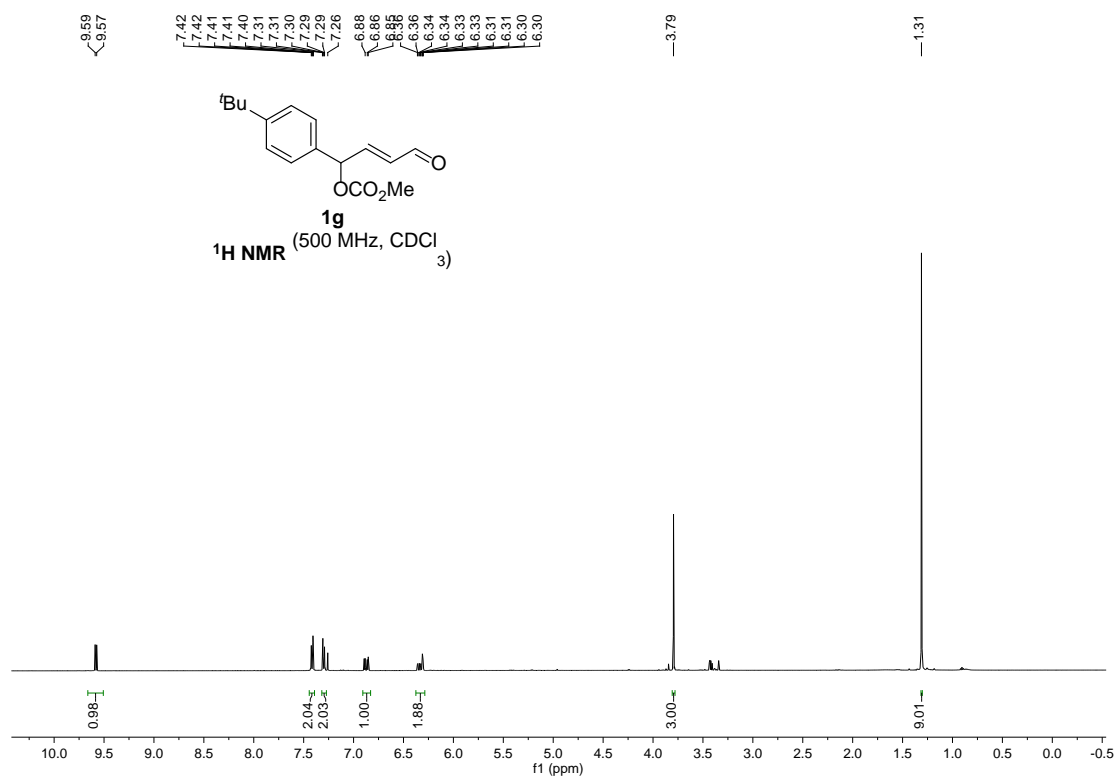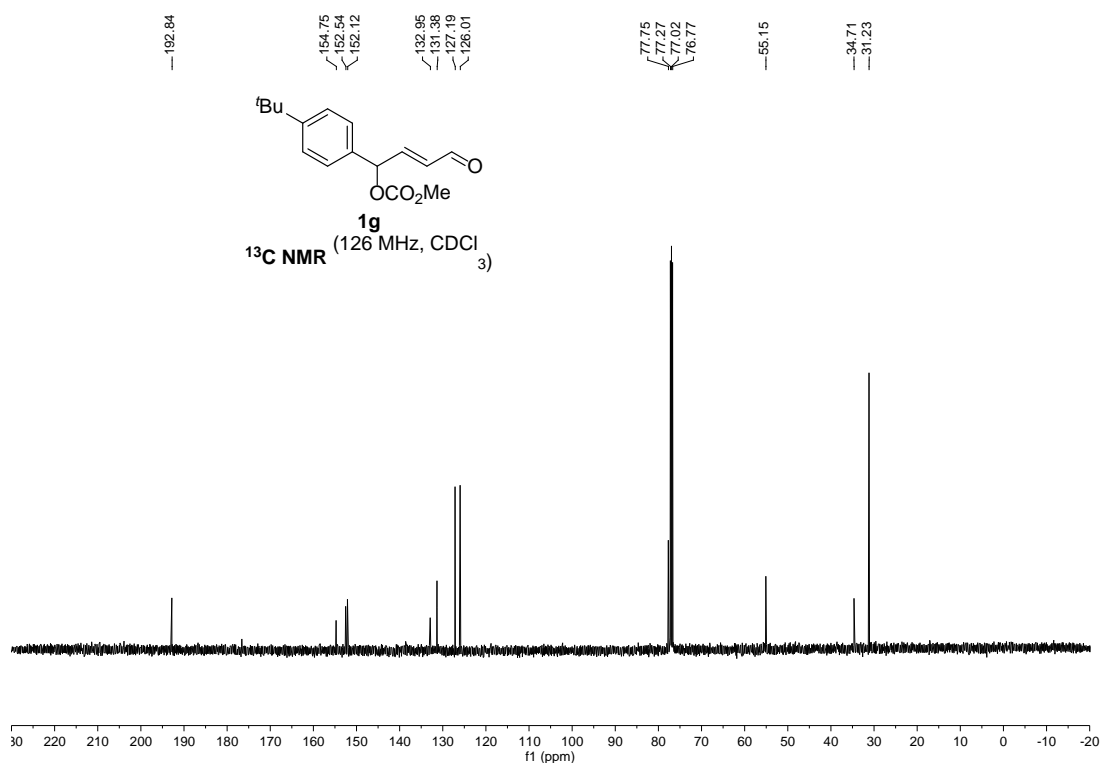



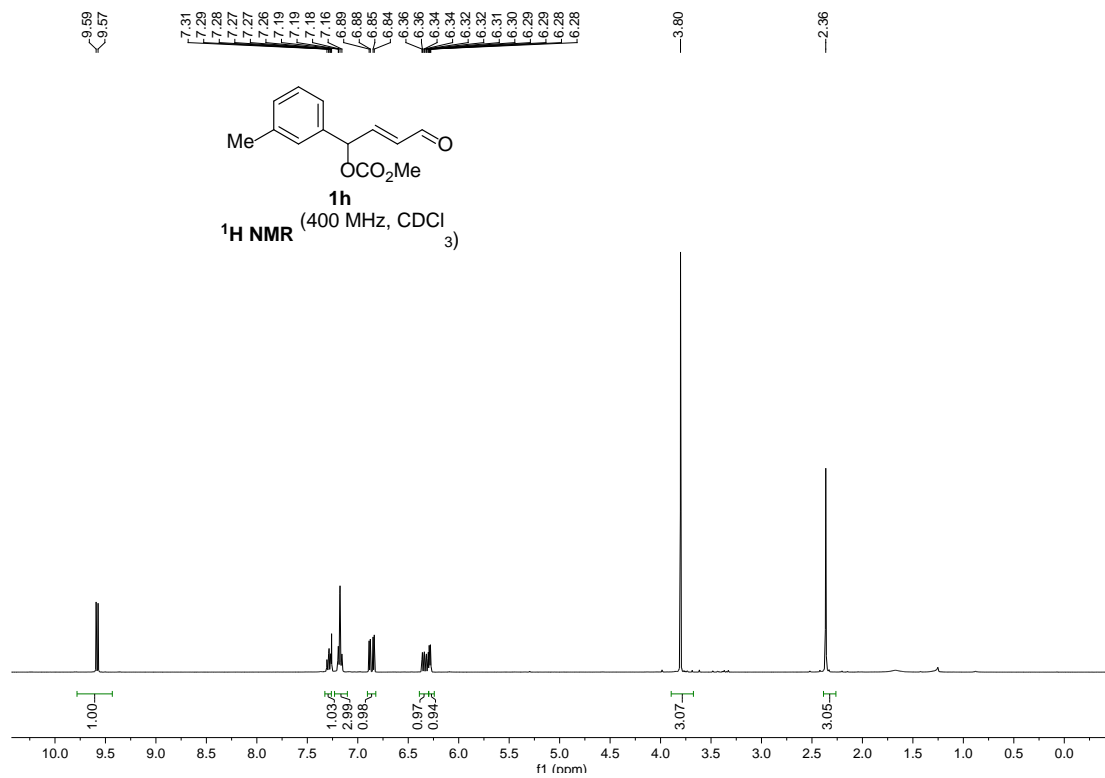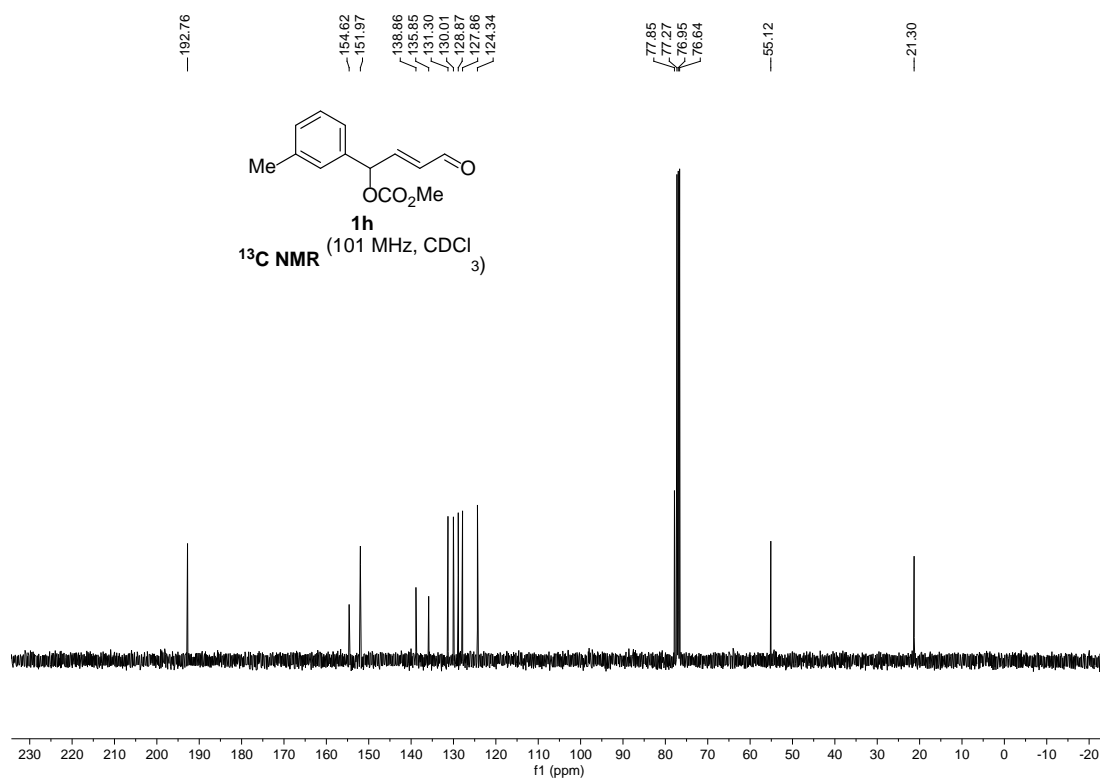

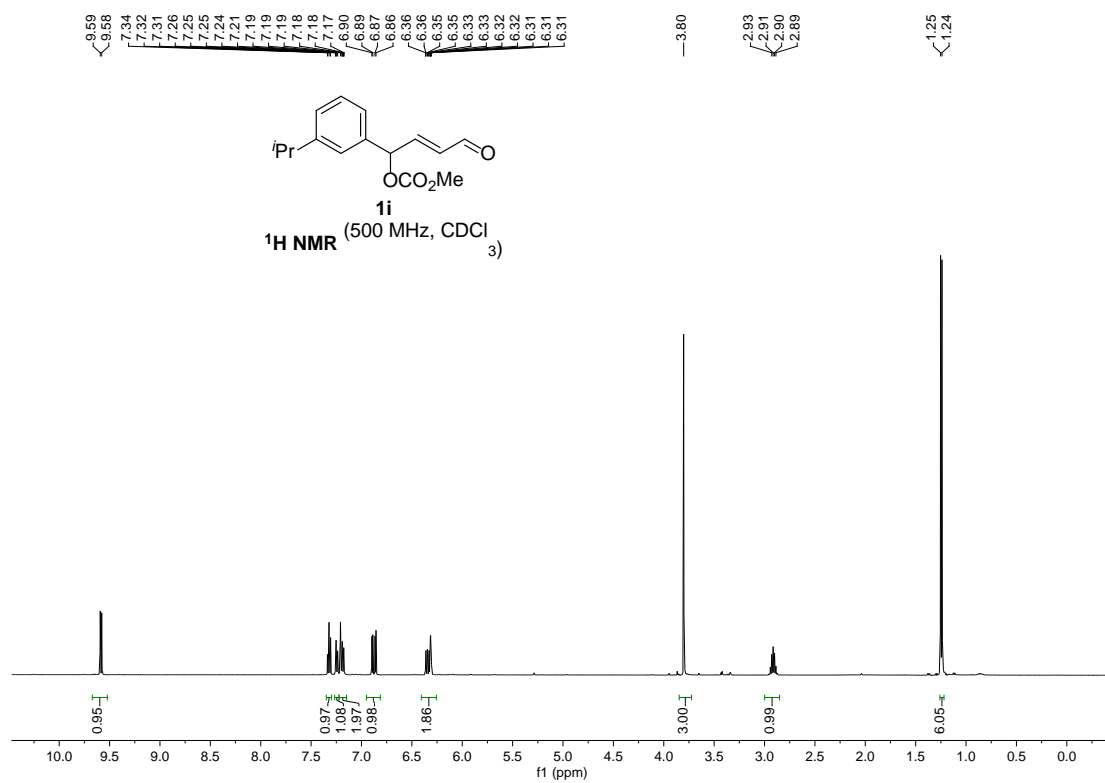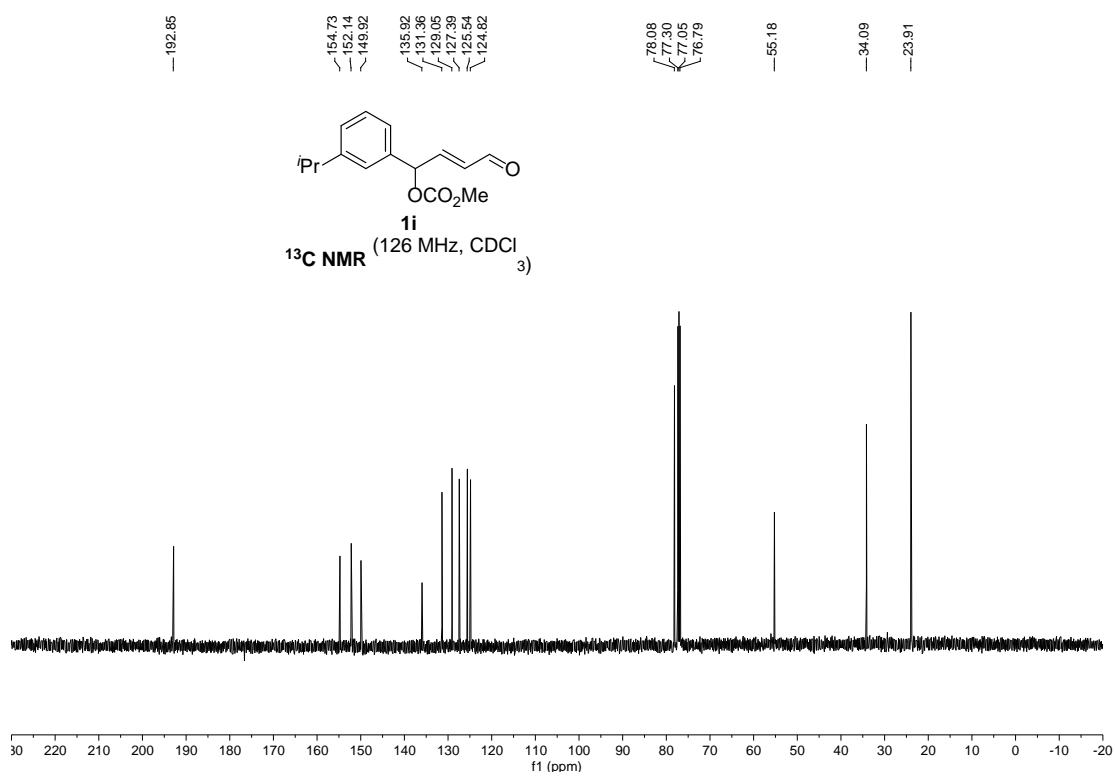

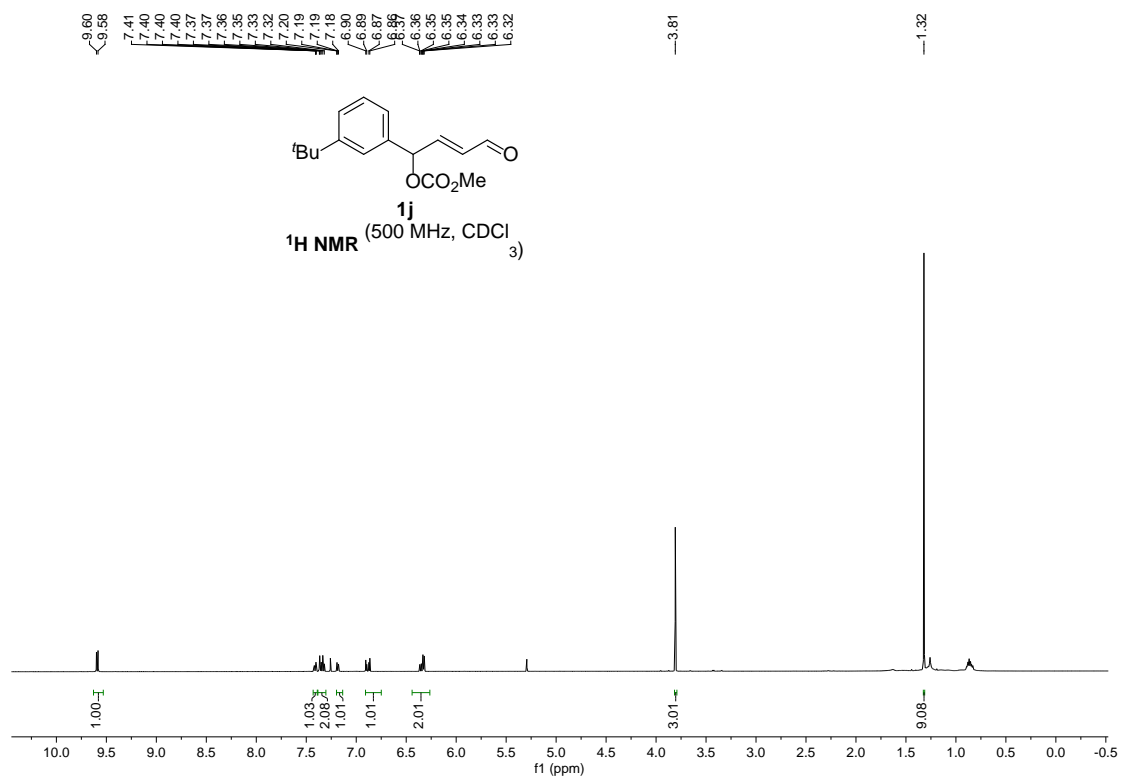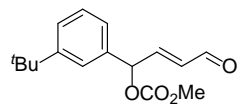

<sup>1</sup>H NMR (500 MHz, CDCl<sub>3</sub>)

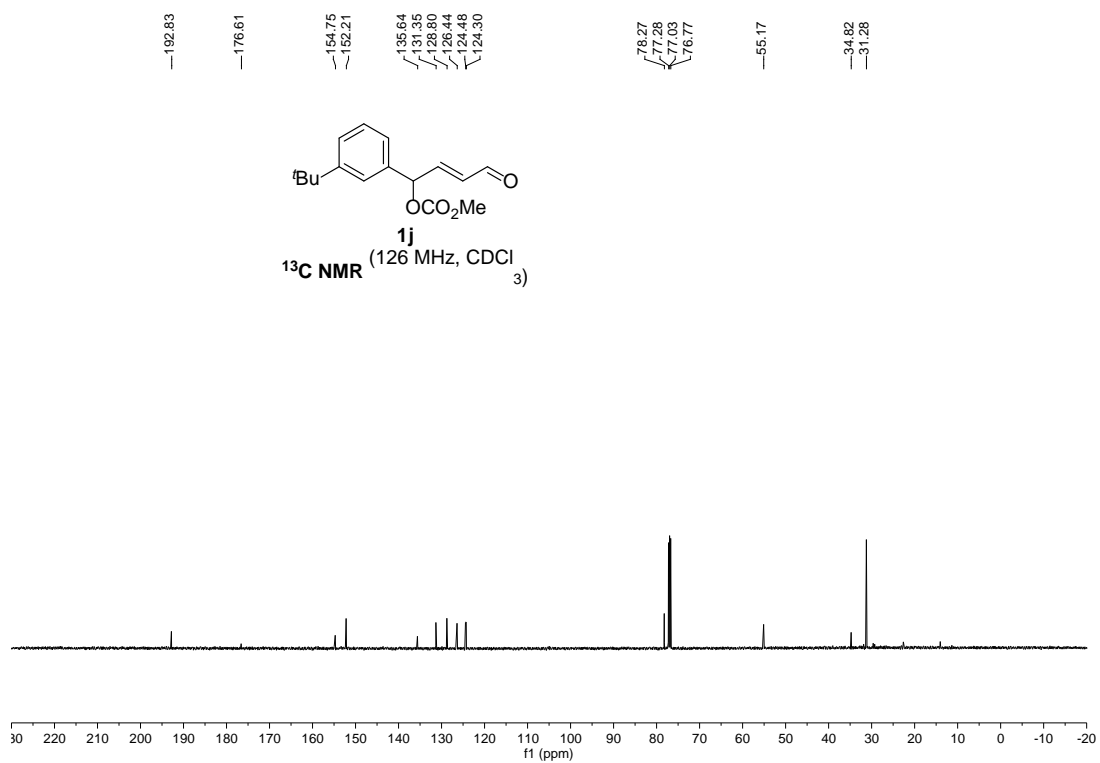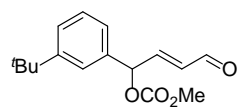

<sup>13</sup>C NMR (126 MHz, CDCl<sub>3</sub>)

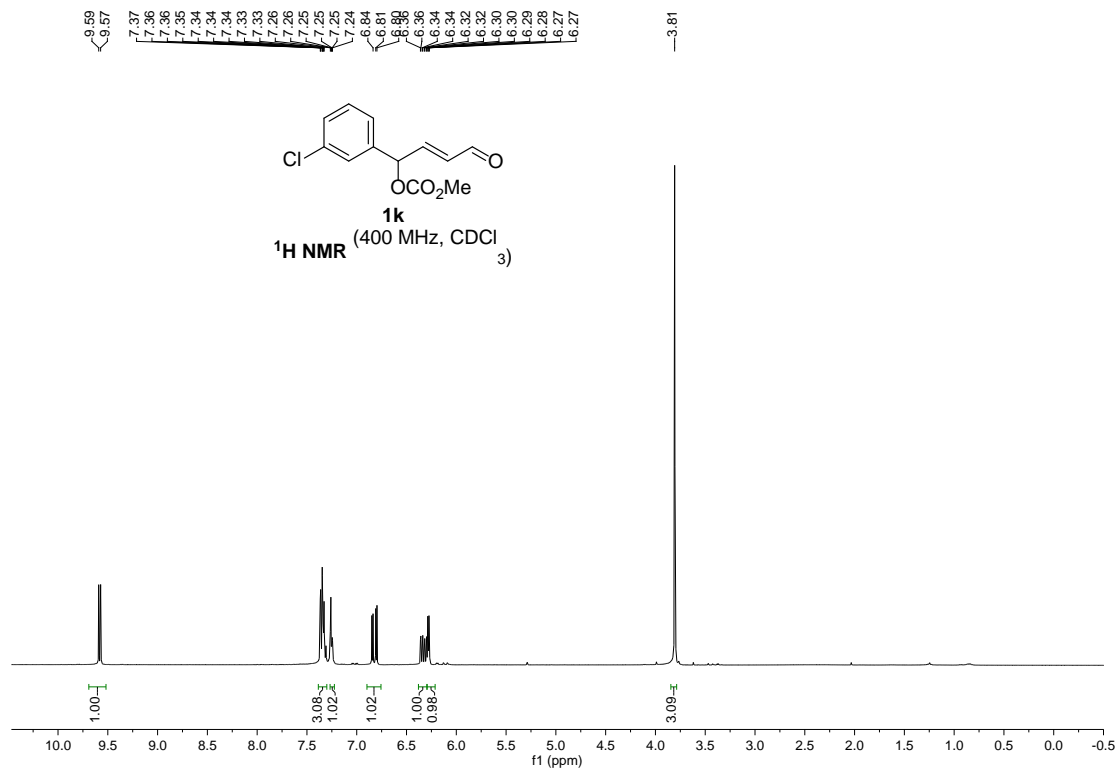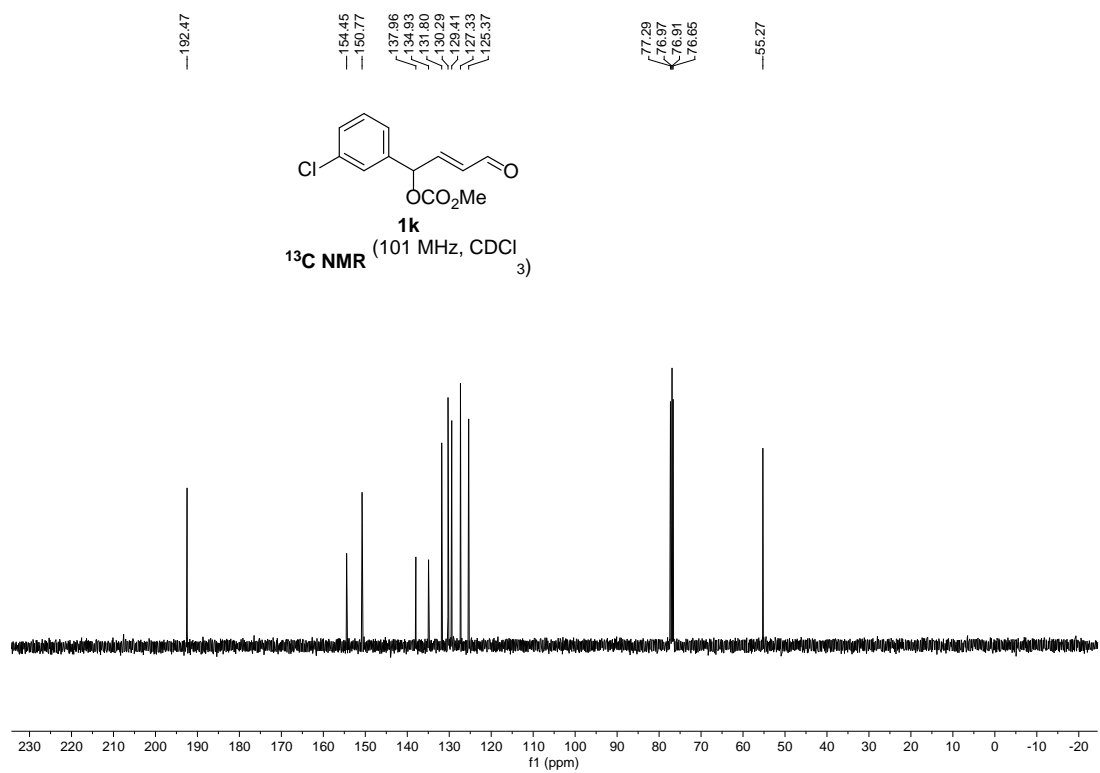

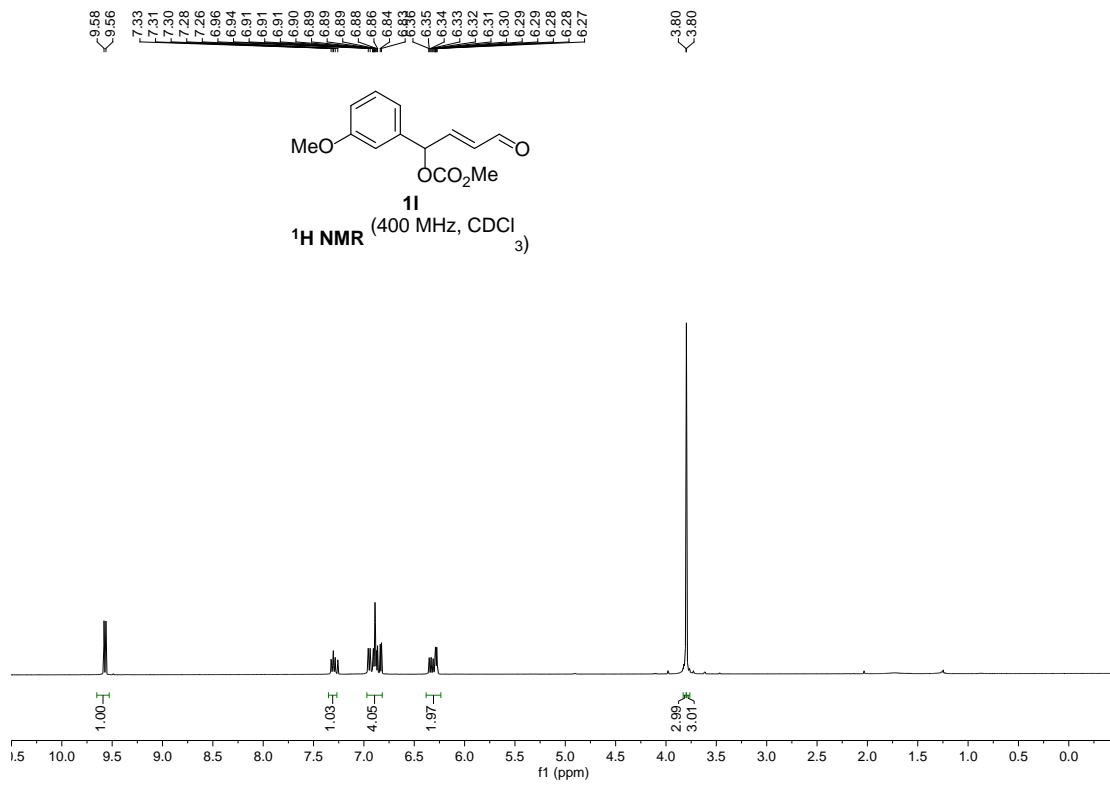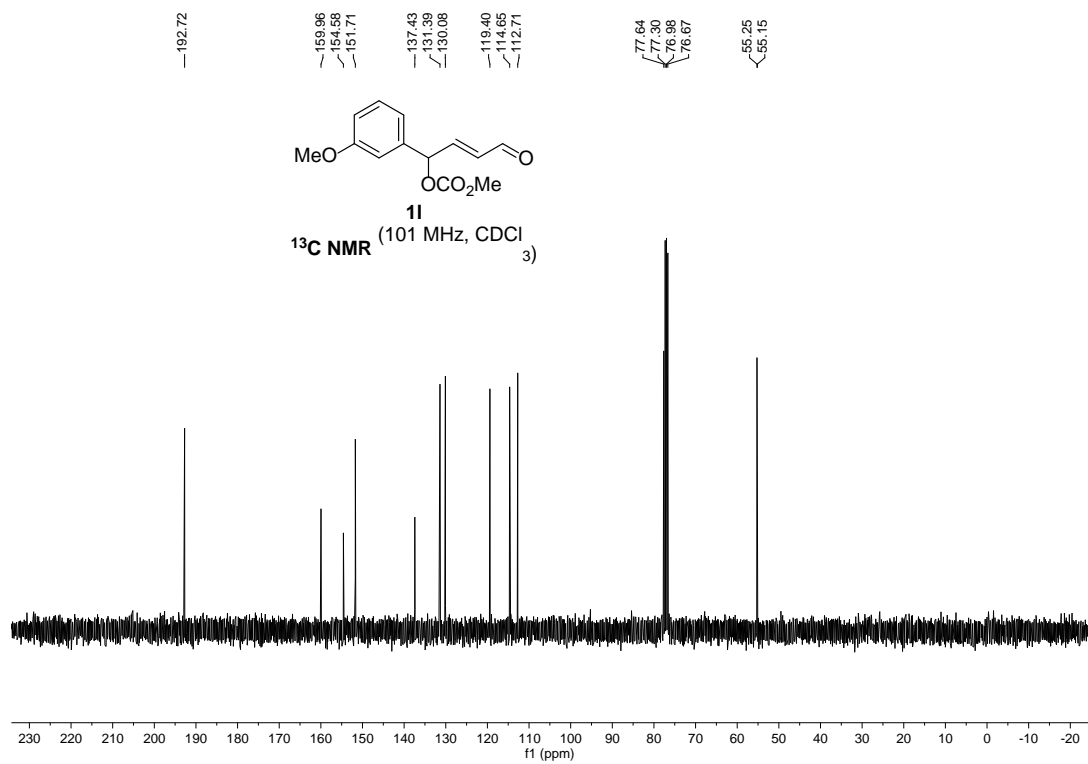

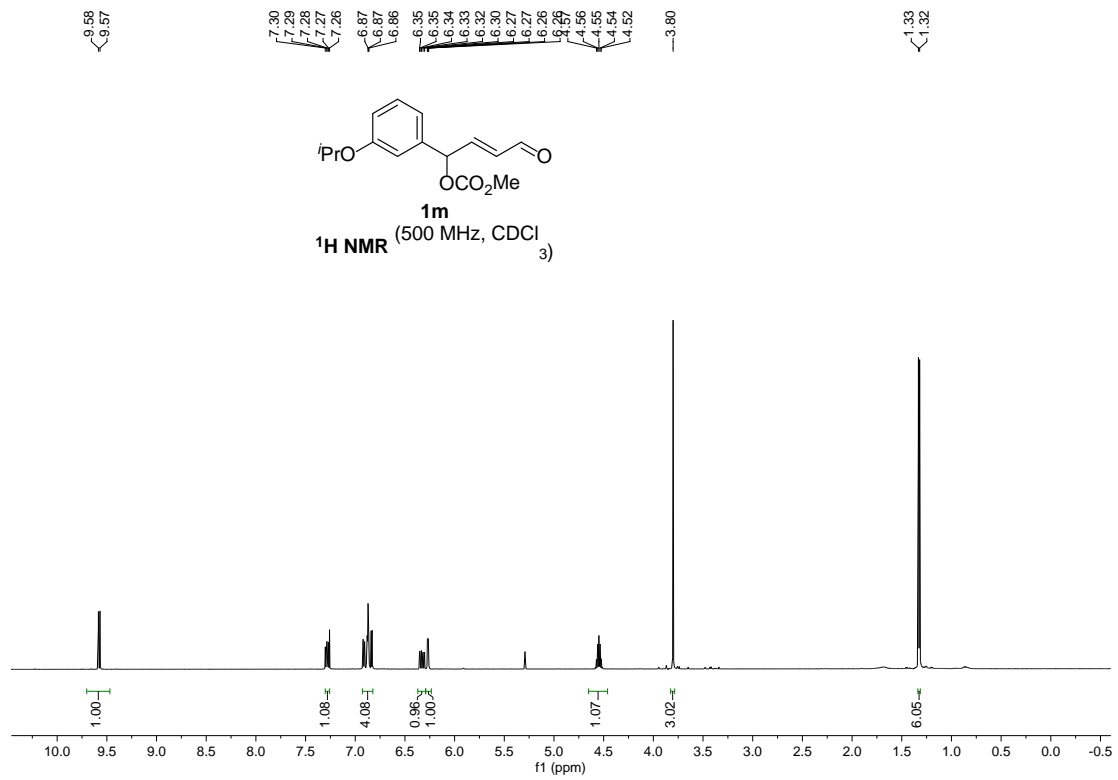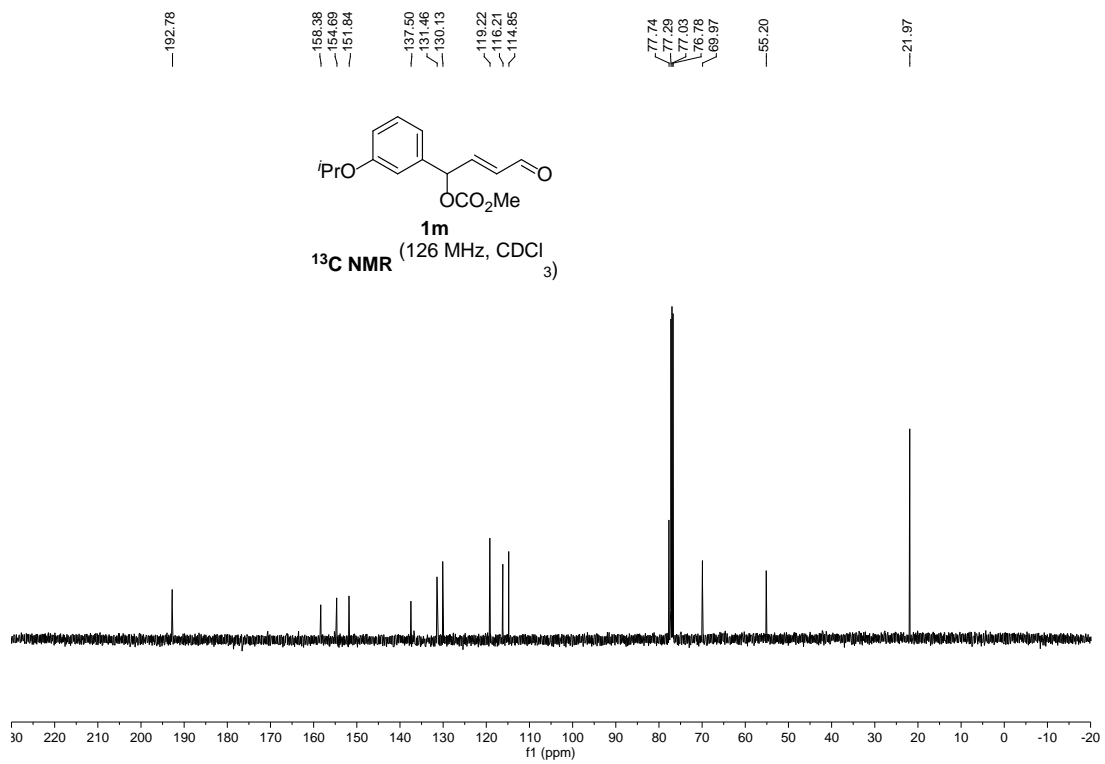

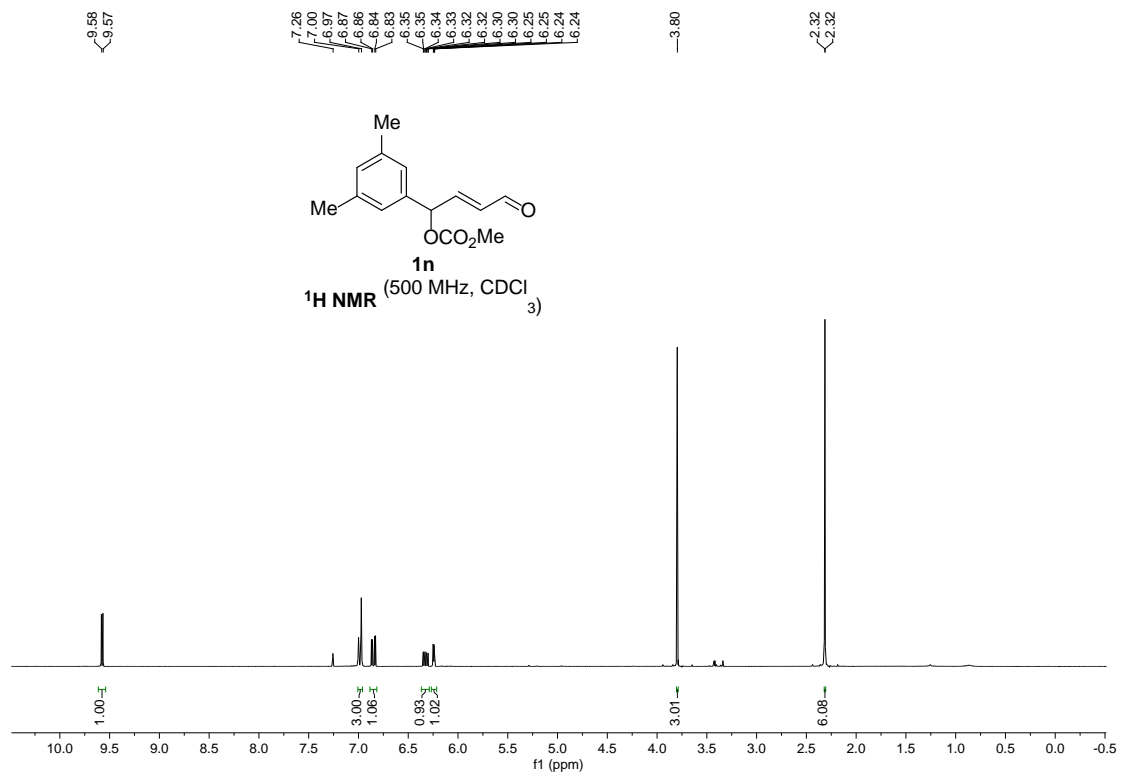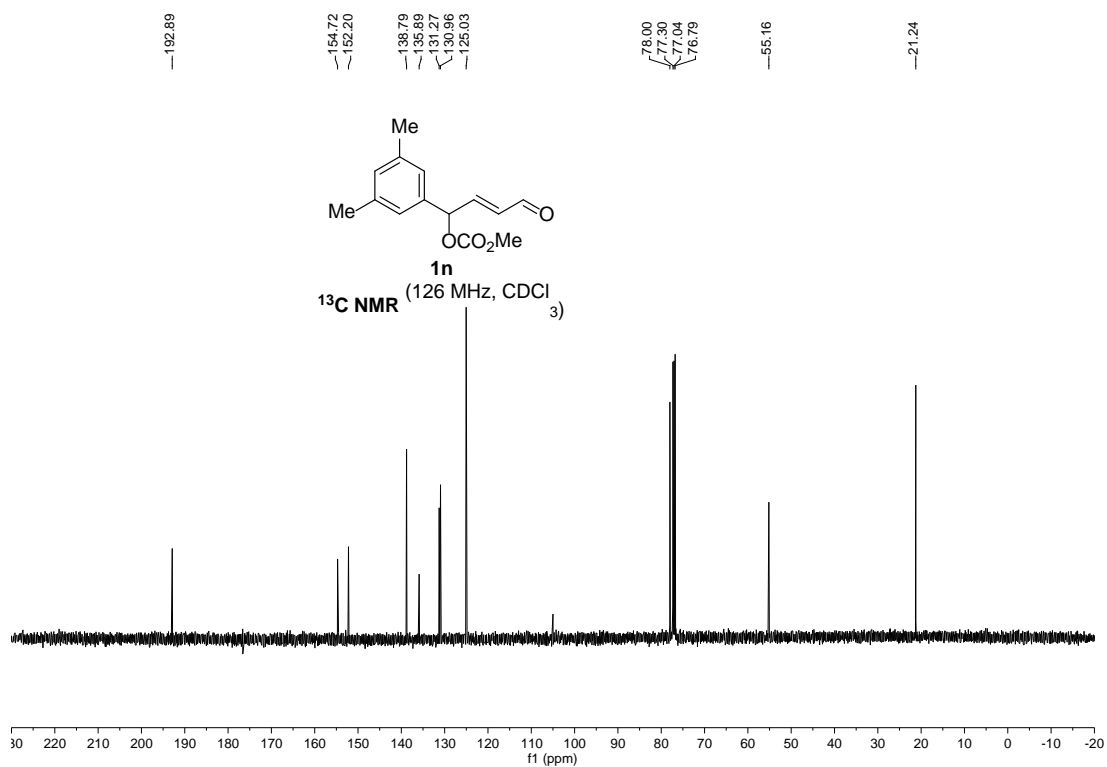

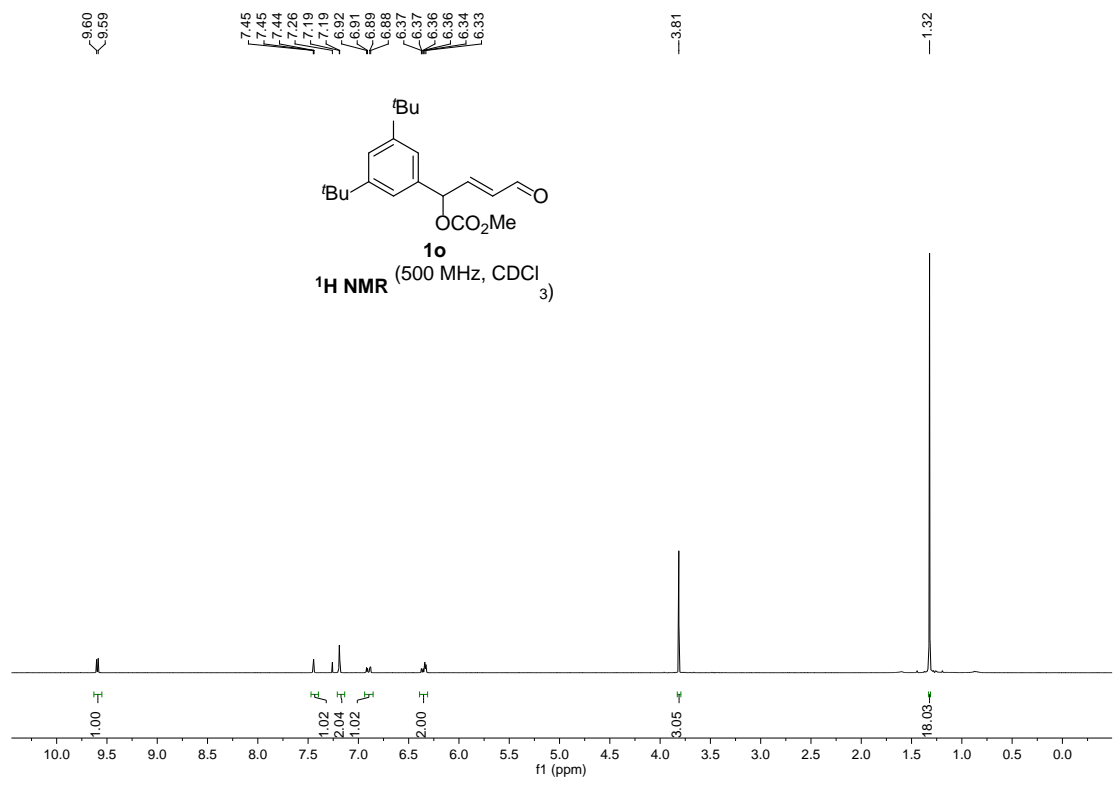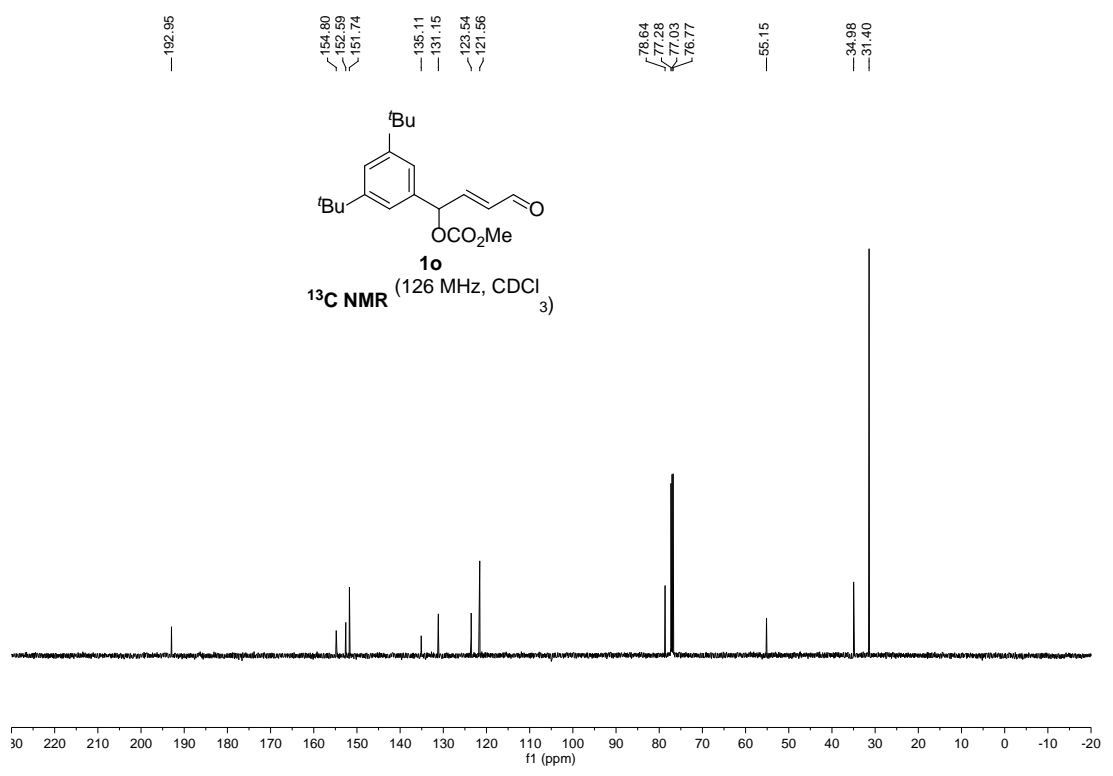



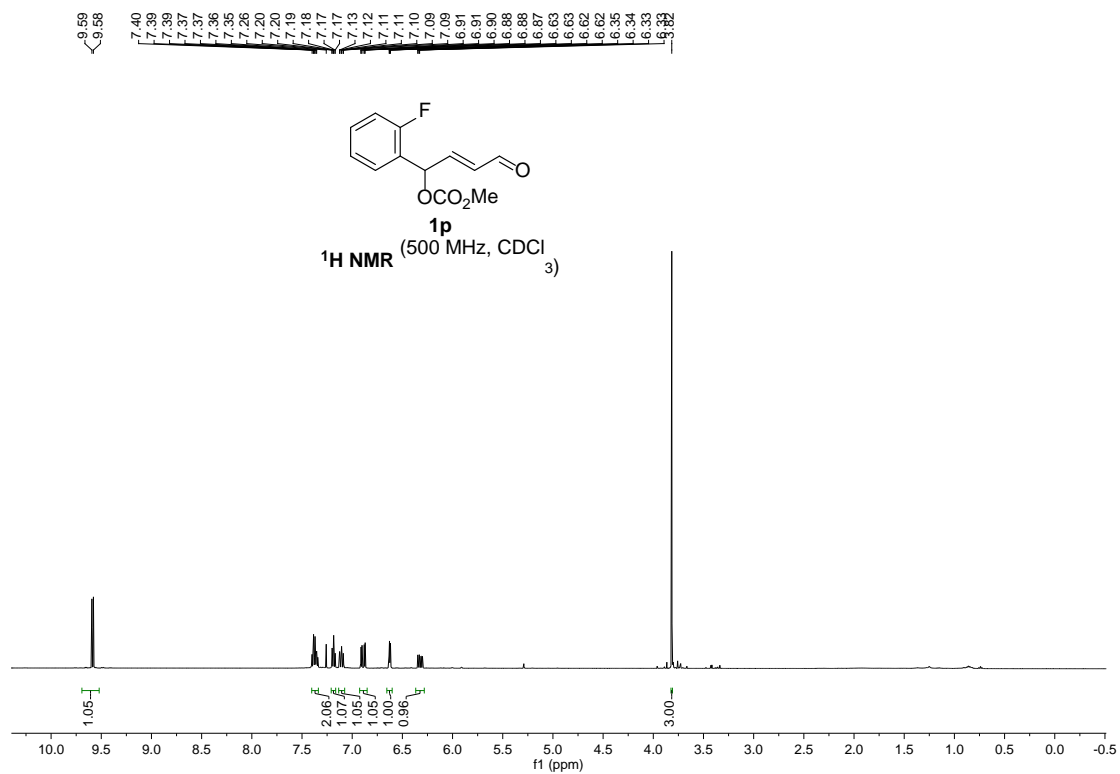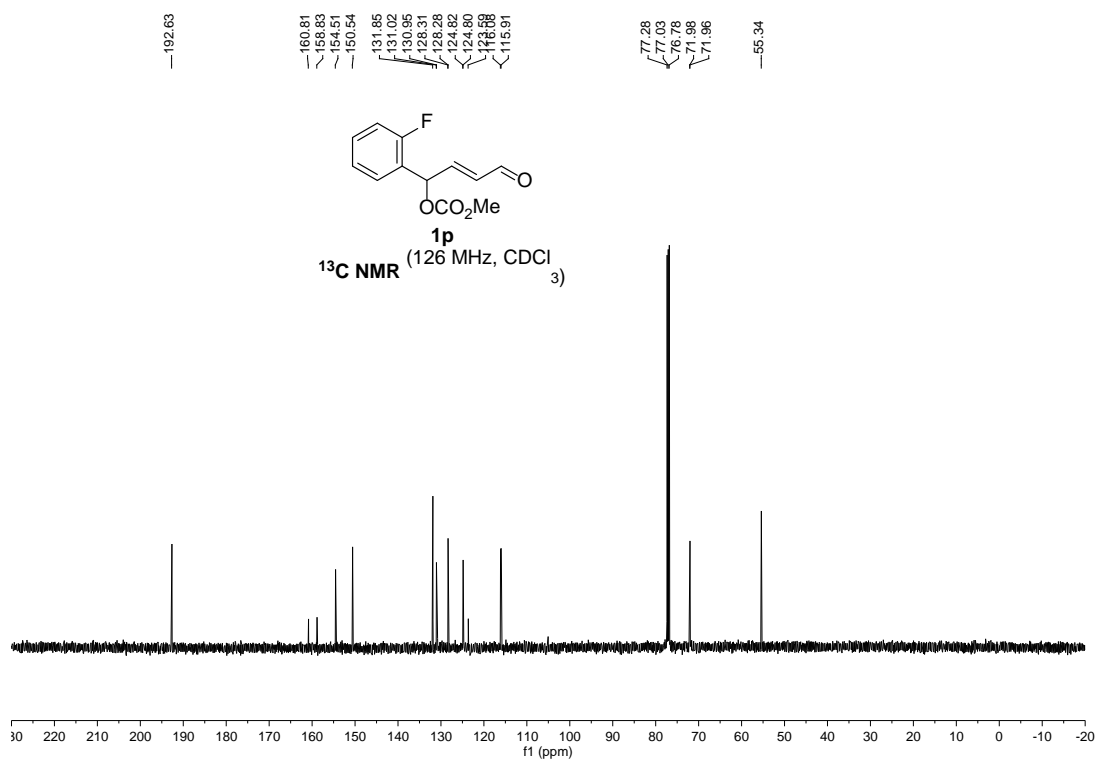

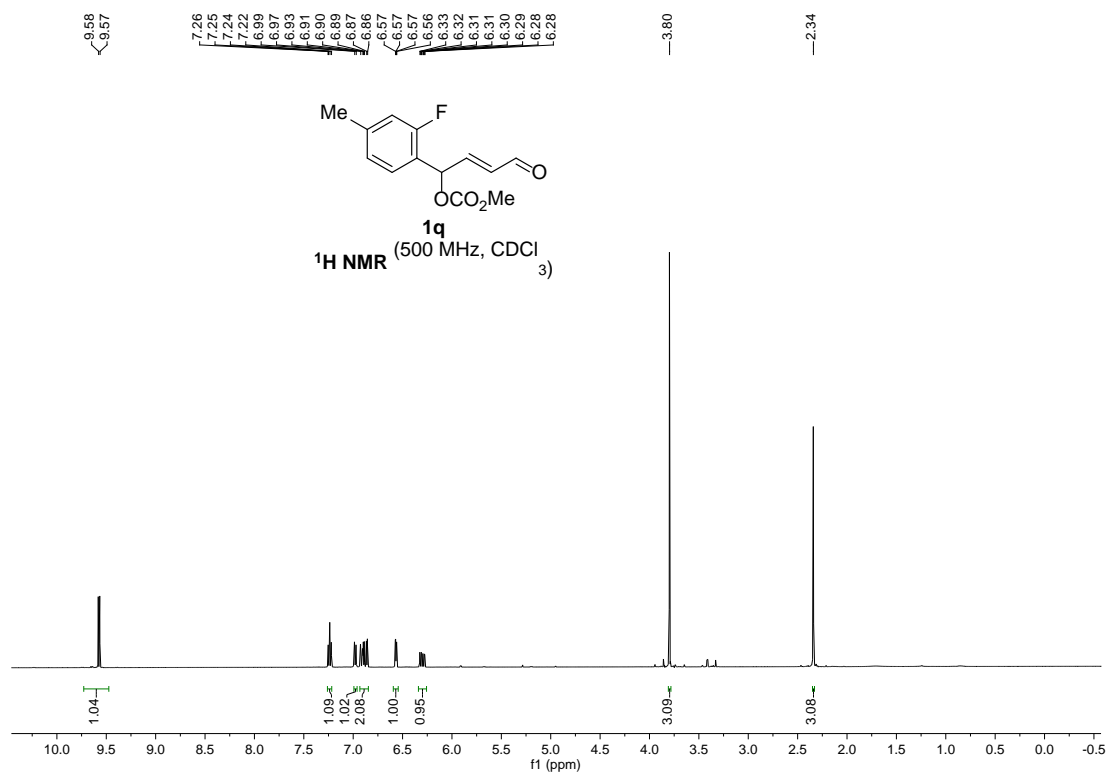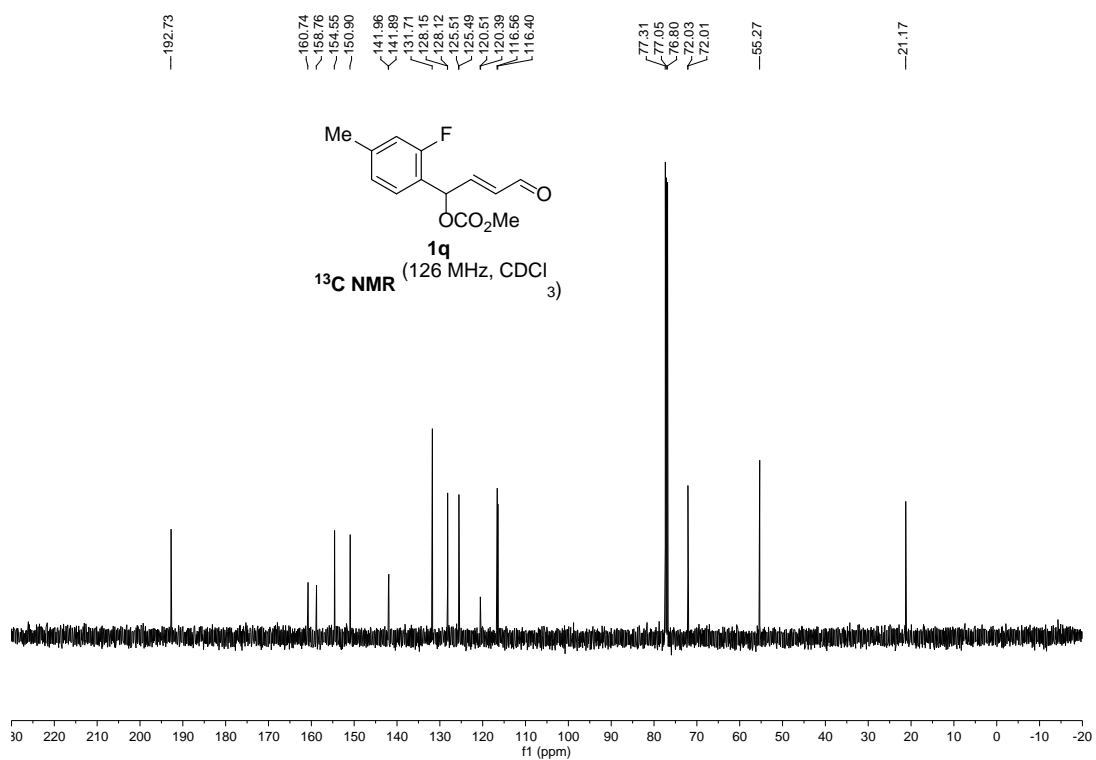

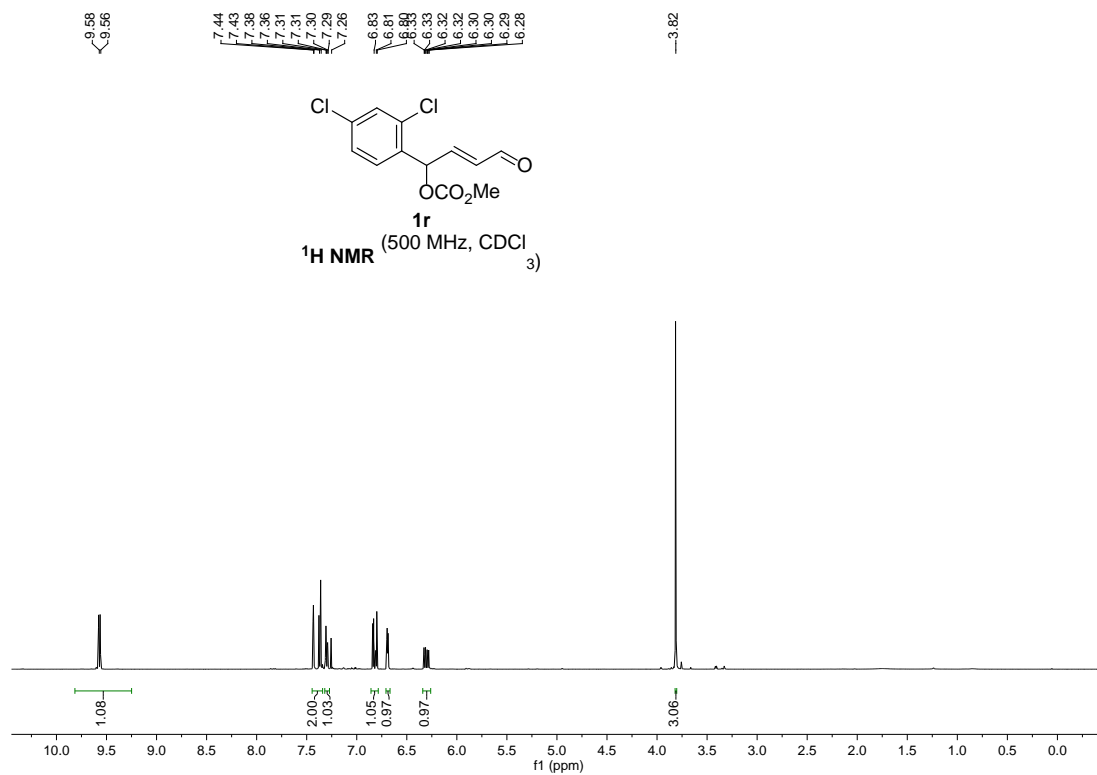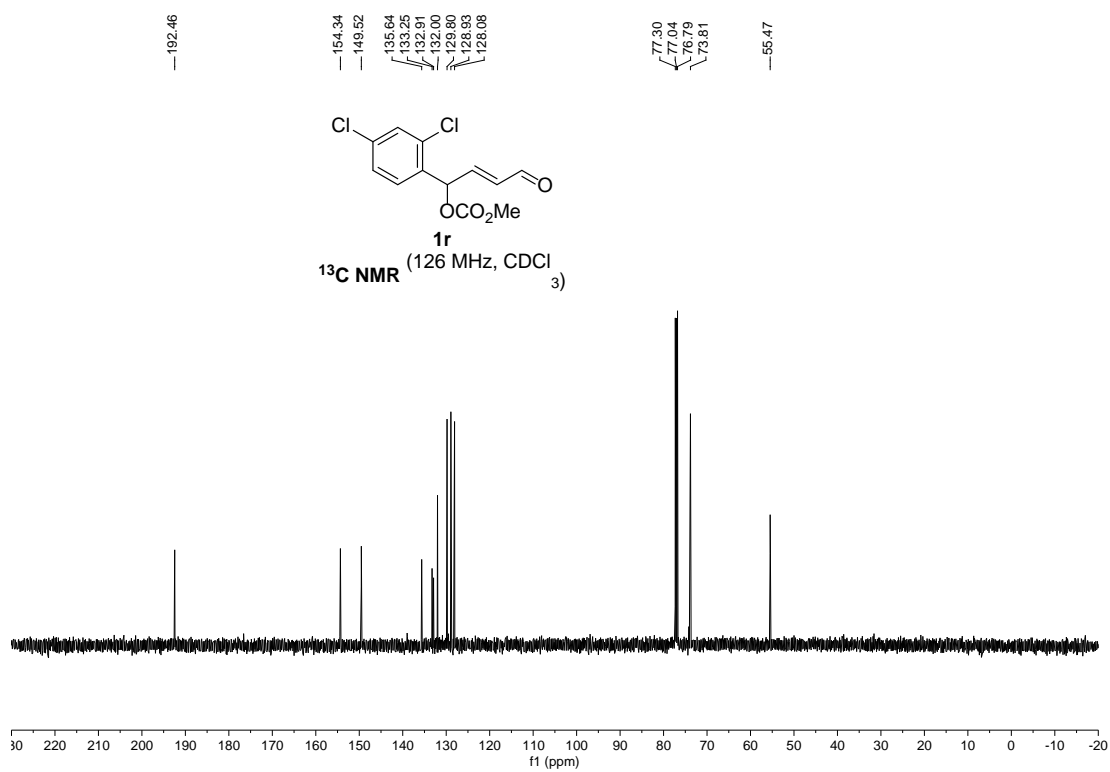

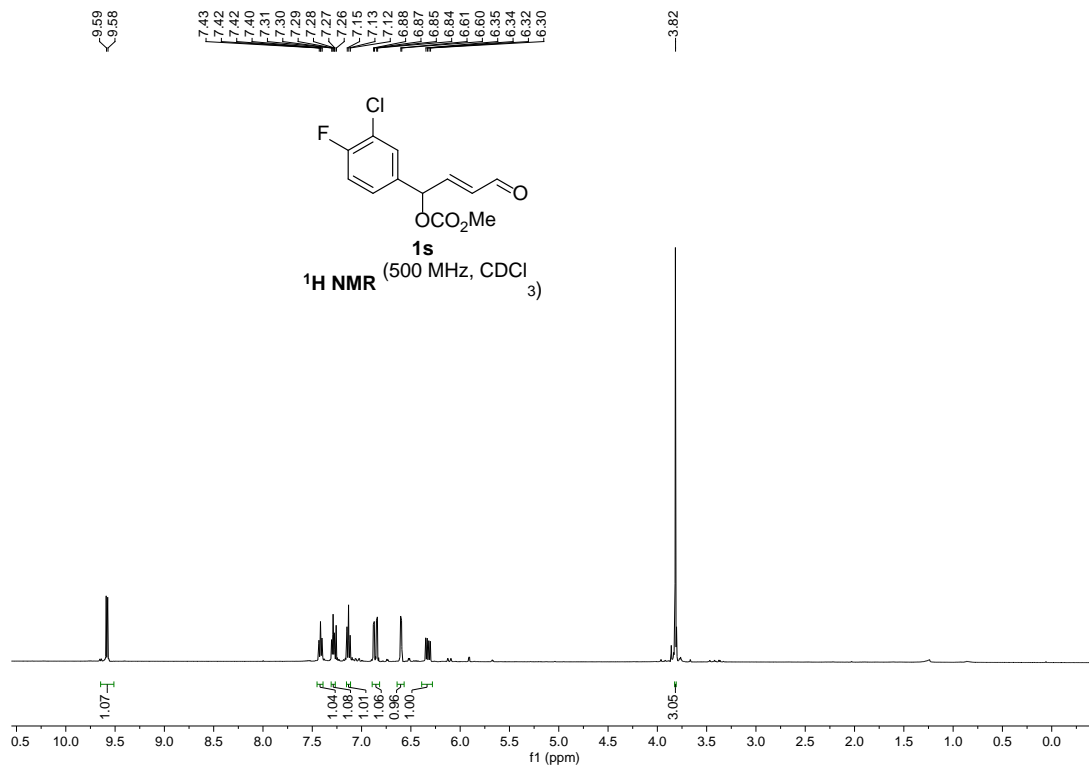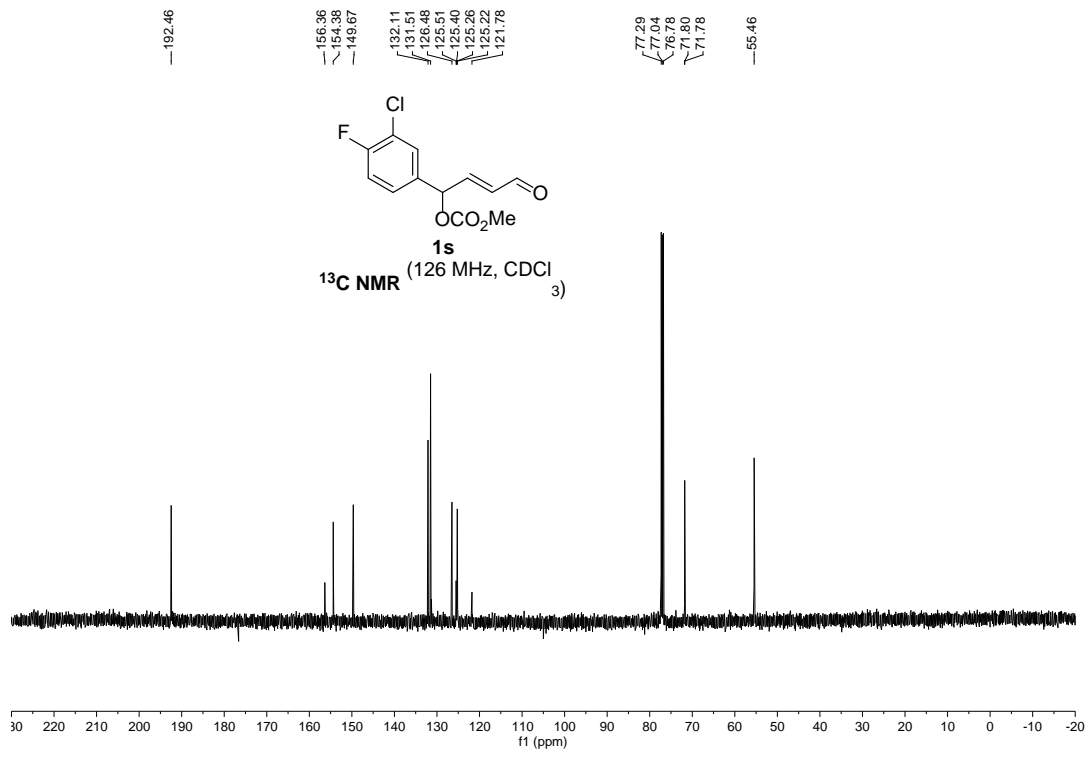

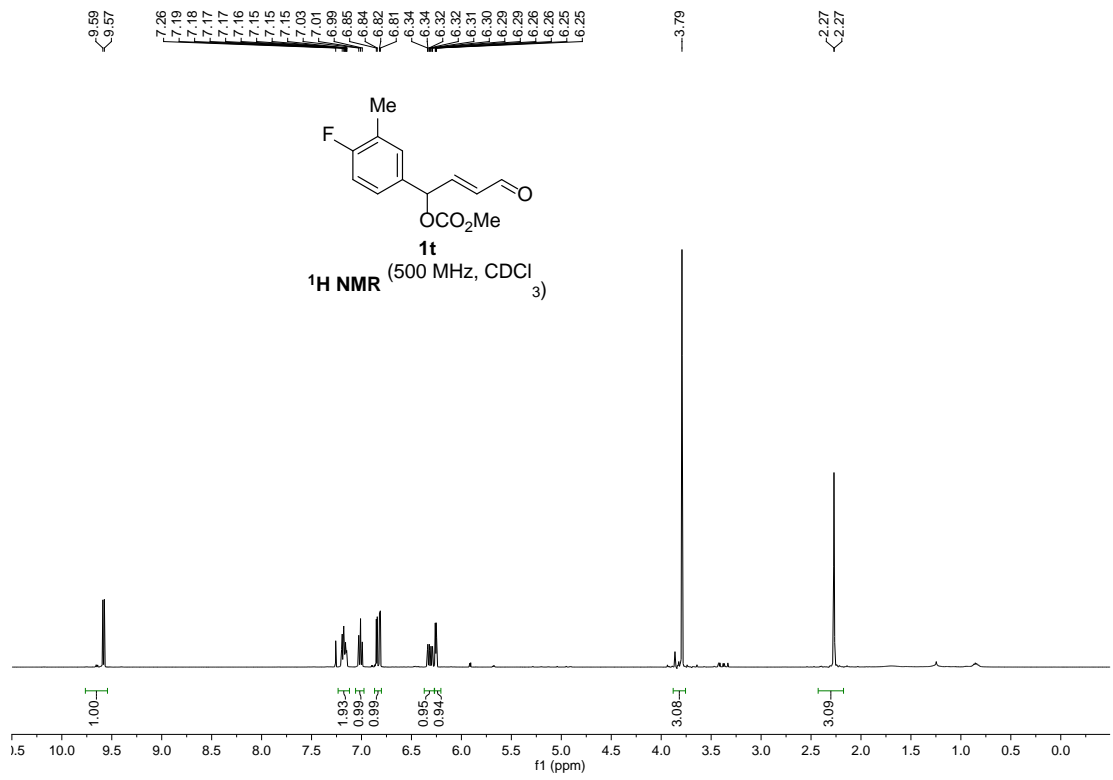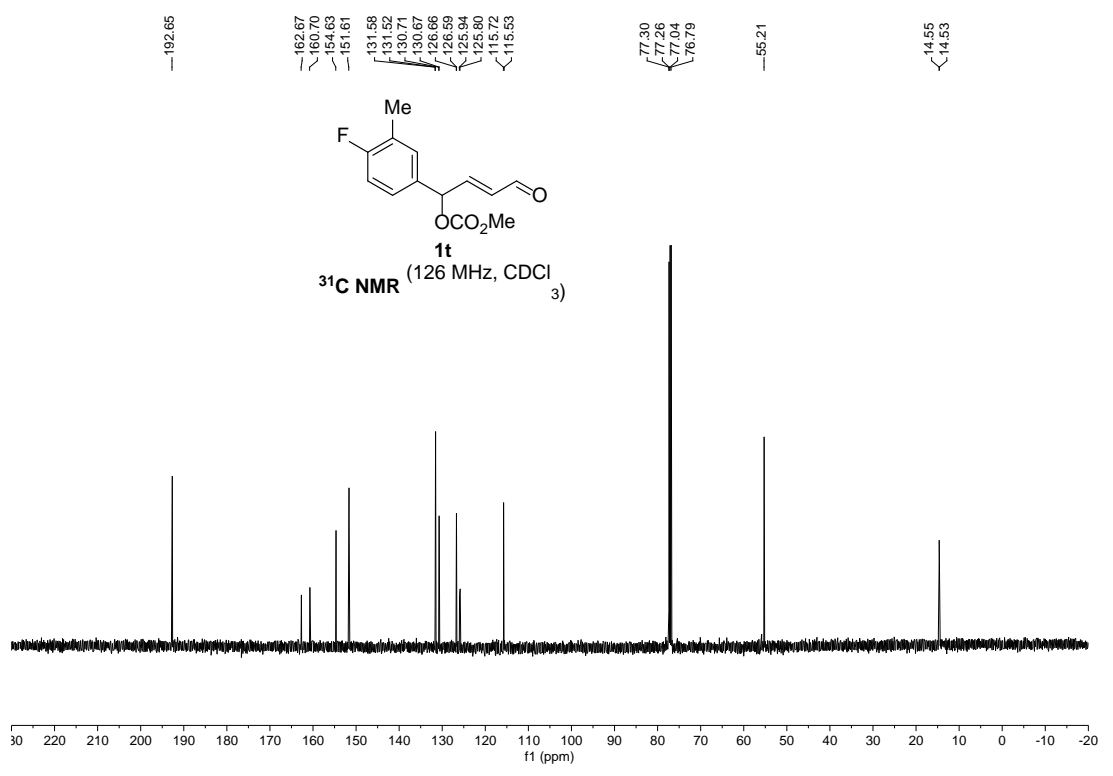

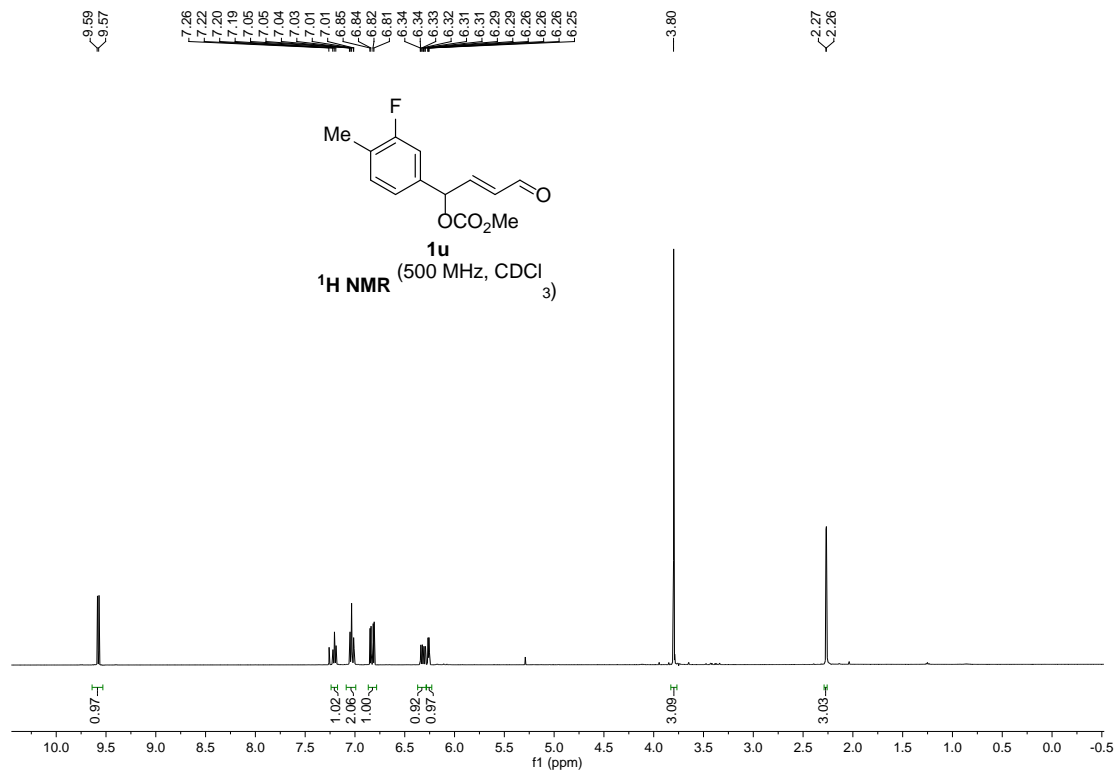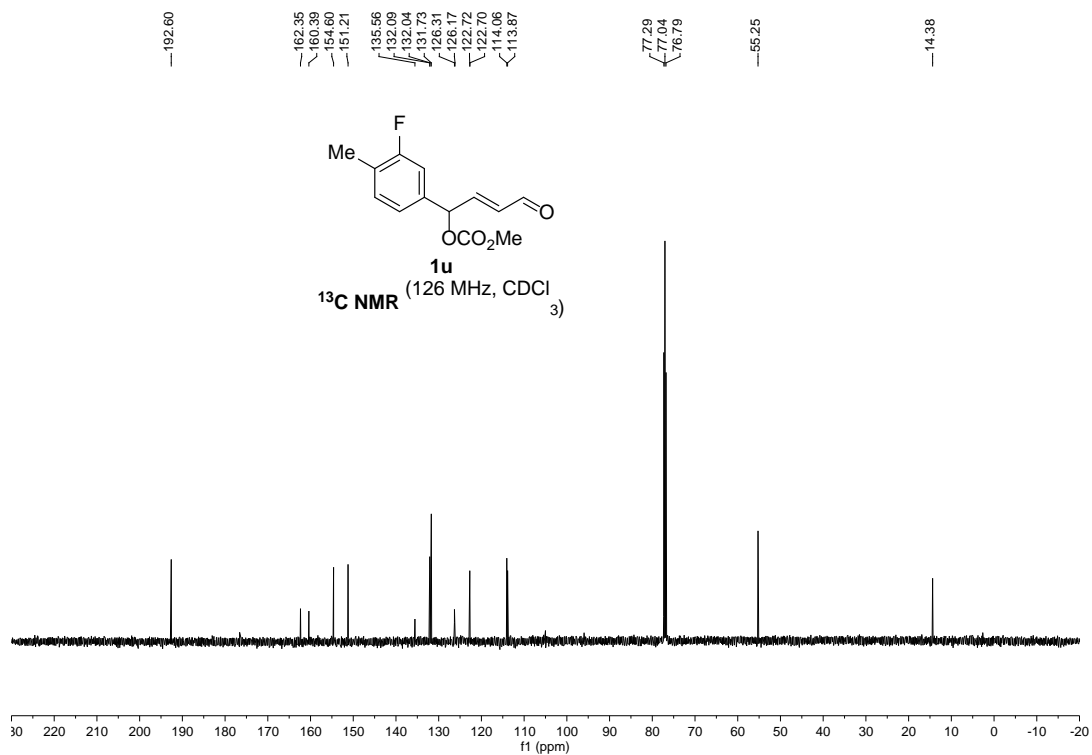

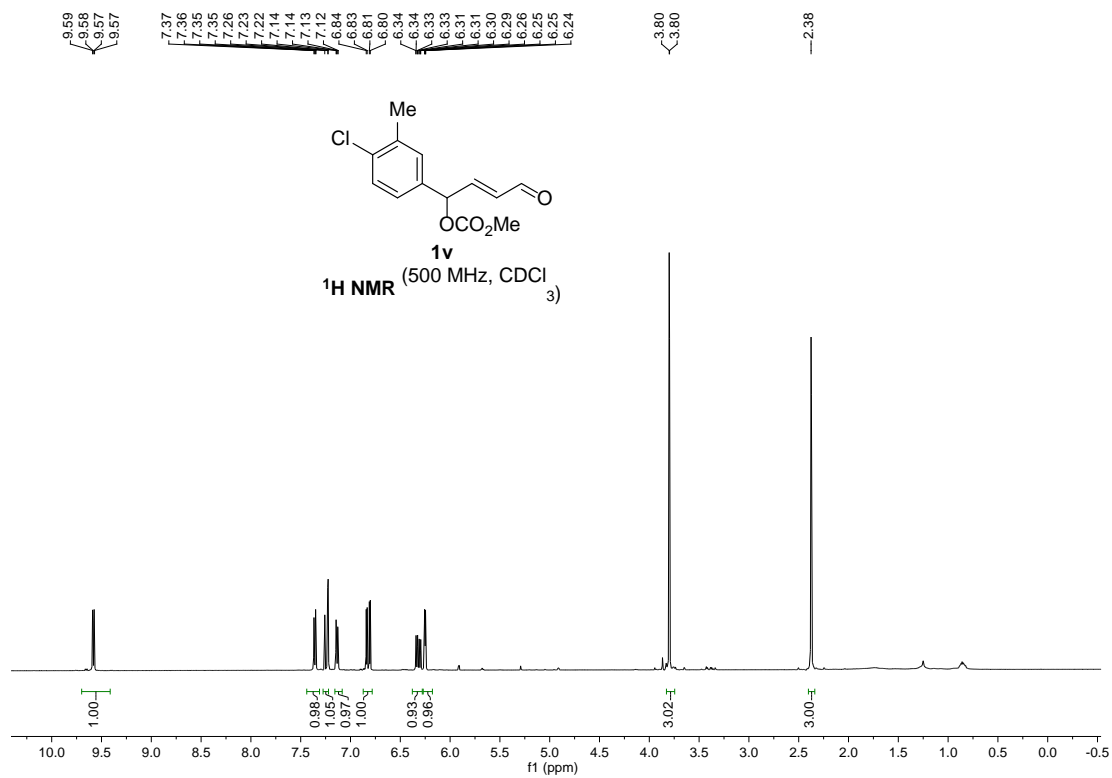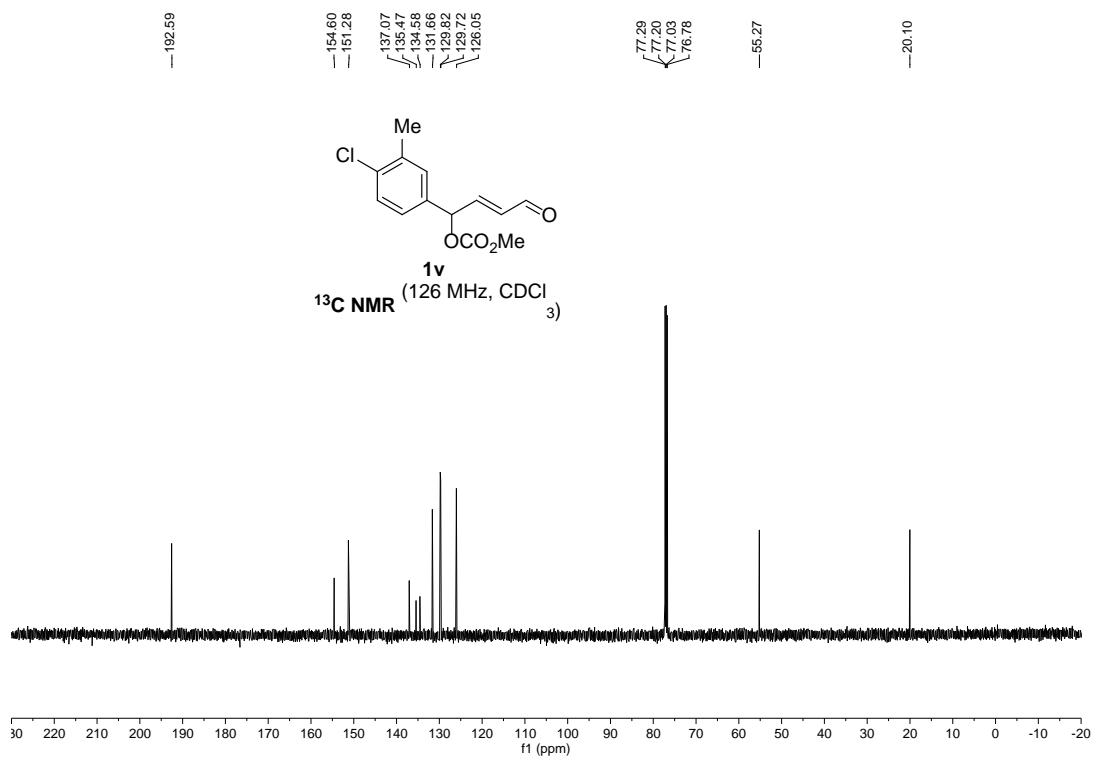

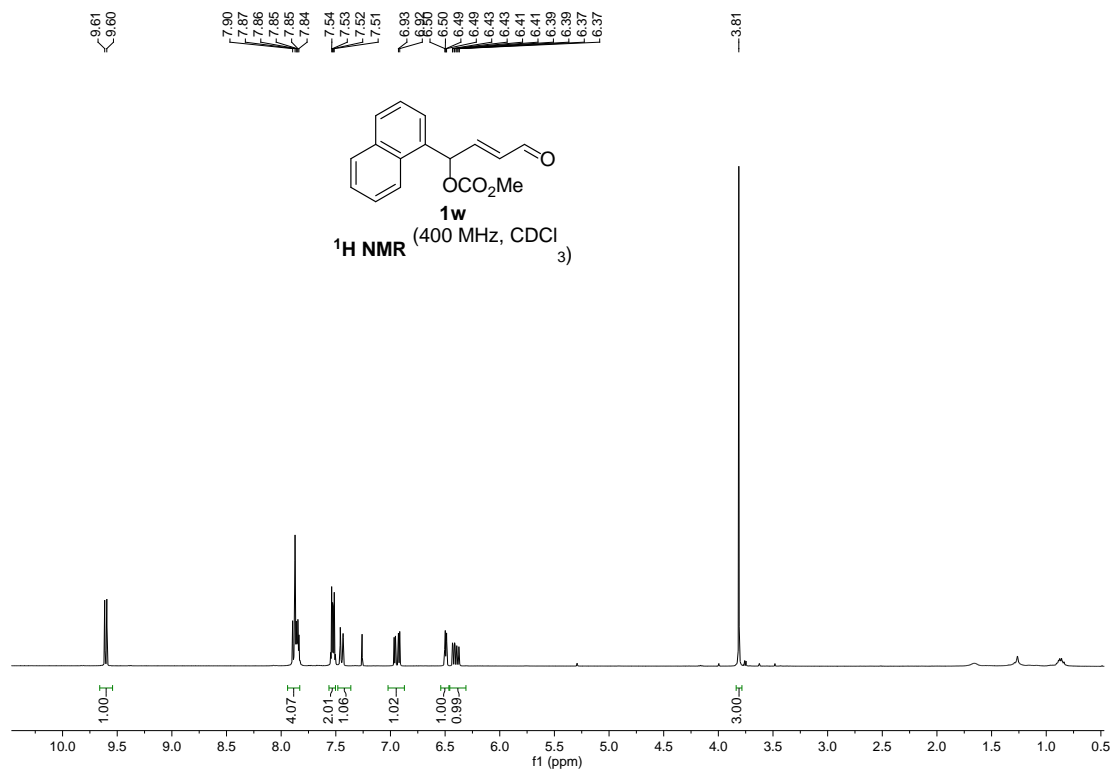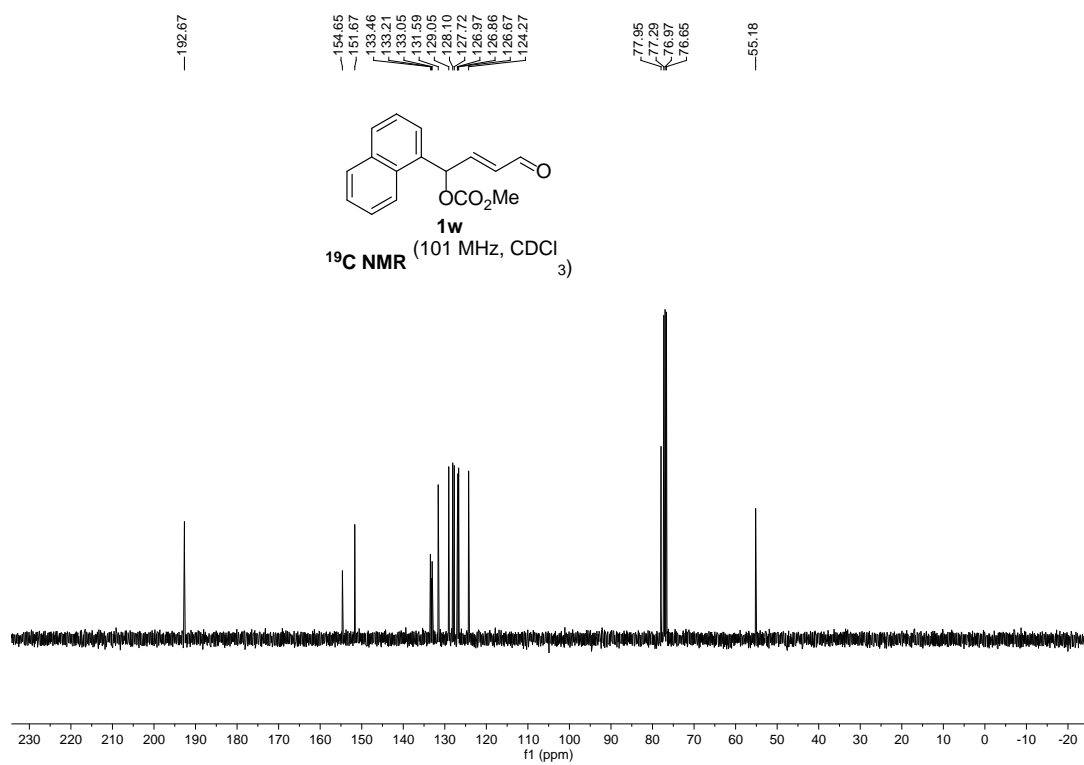



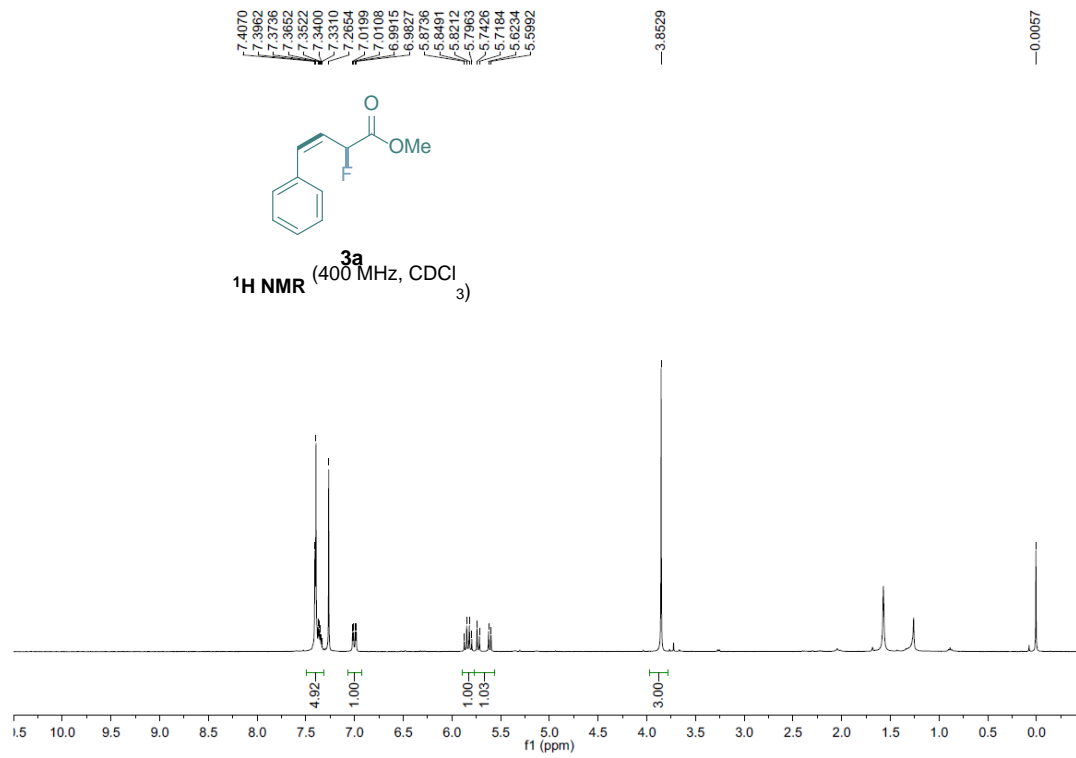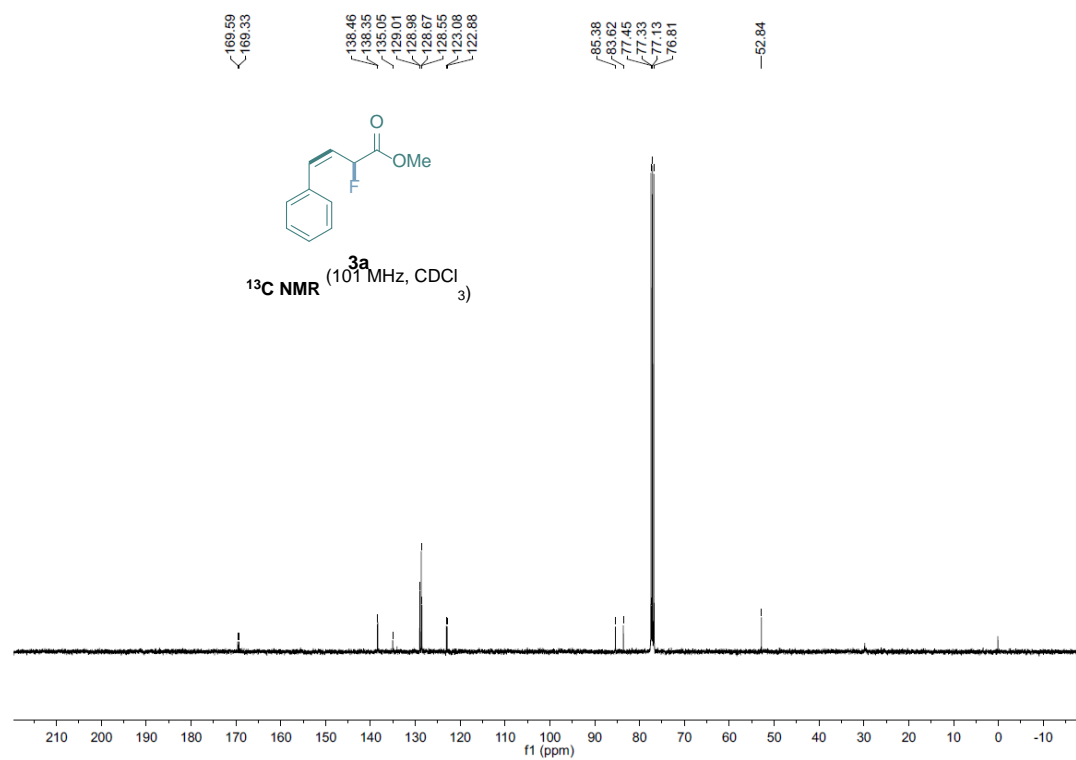

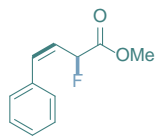

**<sup>19</sup>F NMR** (**3a**, 376 MHz, CDCl<sub>3</sub>)

-174.72

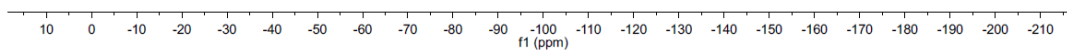

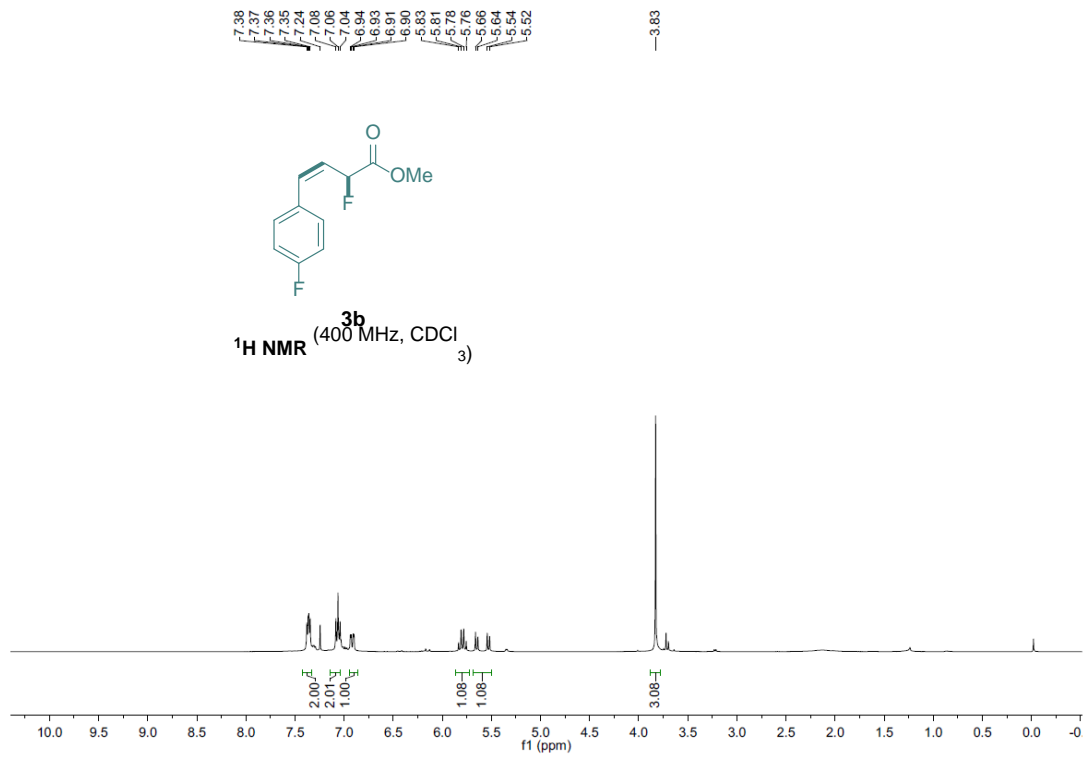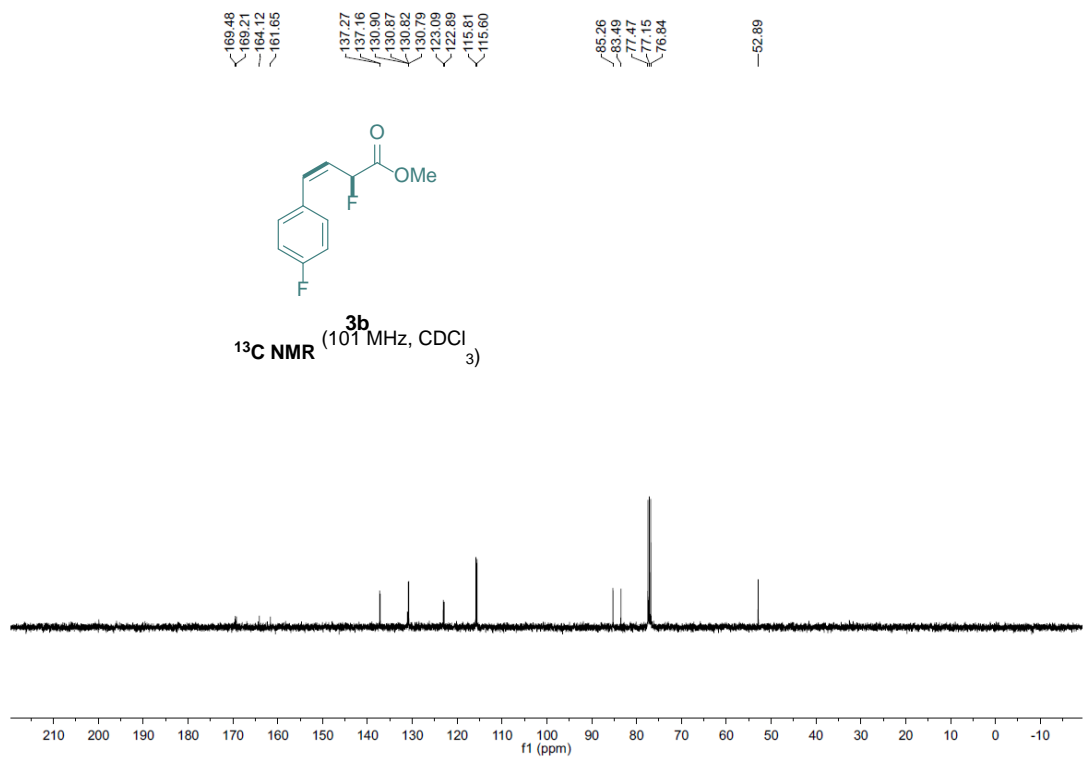

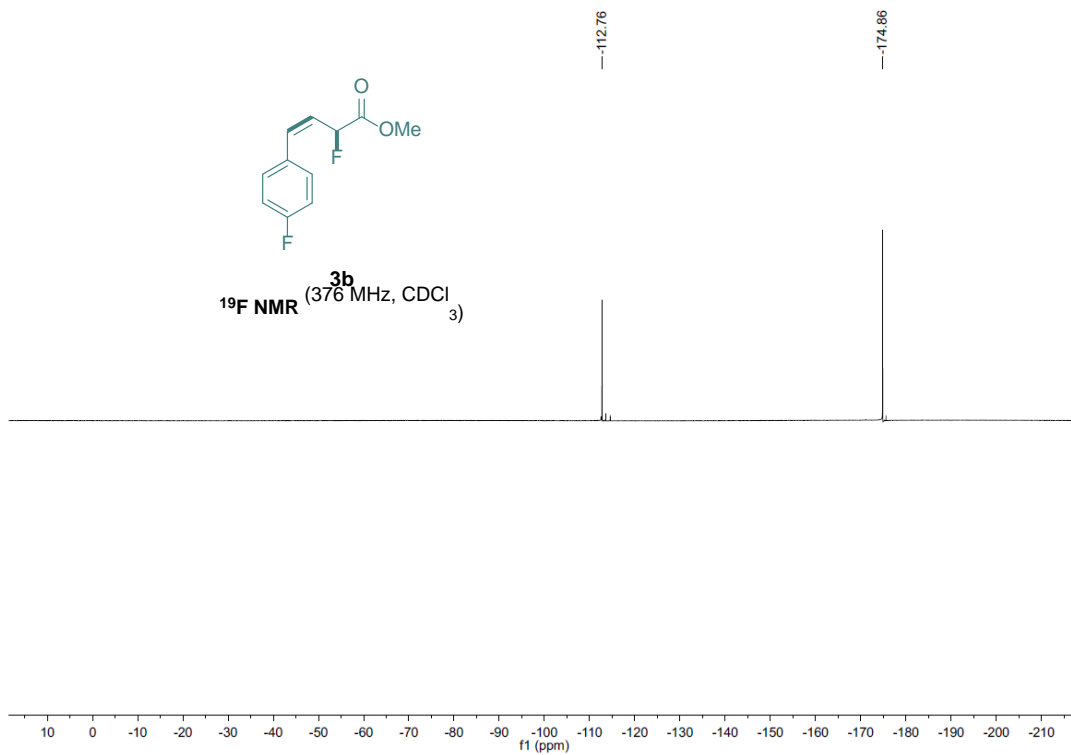

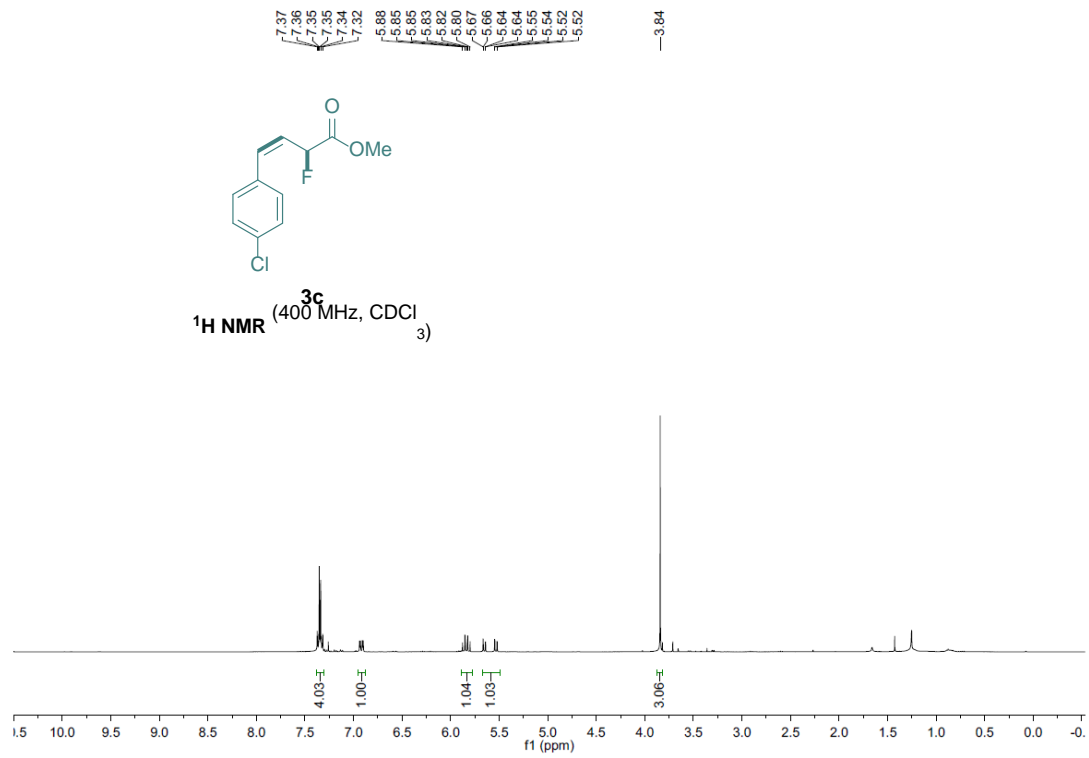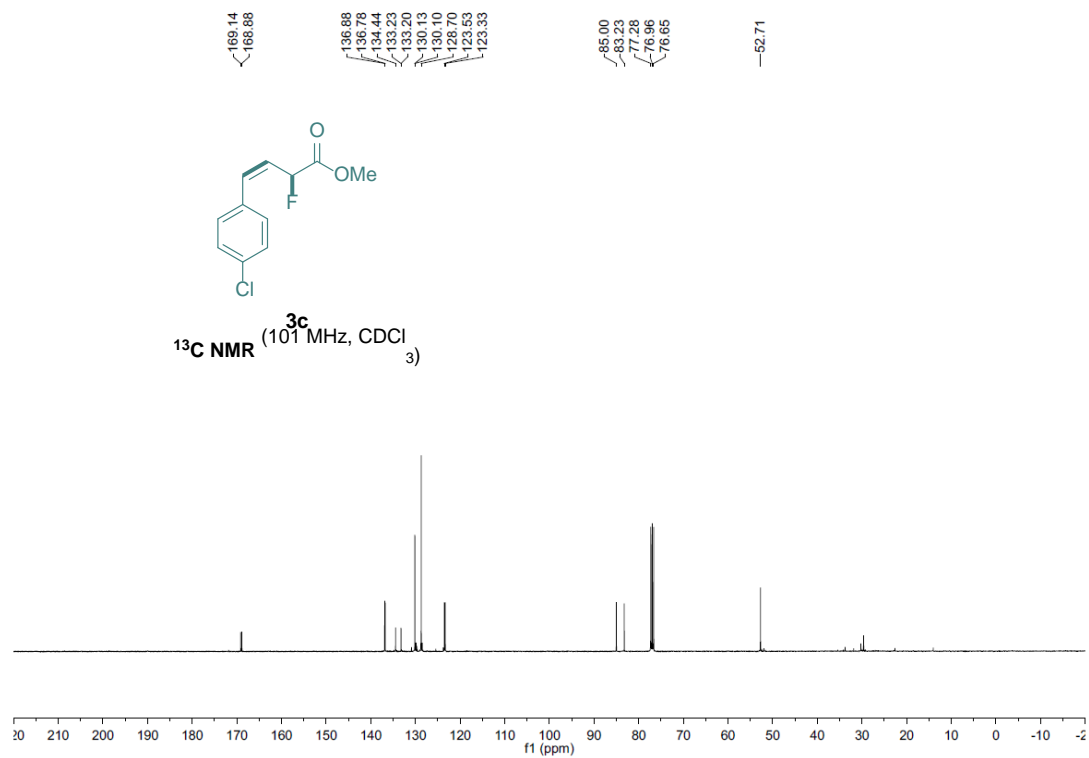

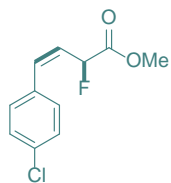

**3c**  
**<sup>19</sup>F NMR** (376 MHz, CDCl<sub>3</sub>)

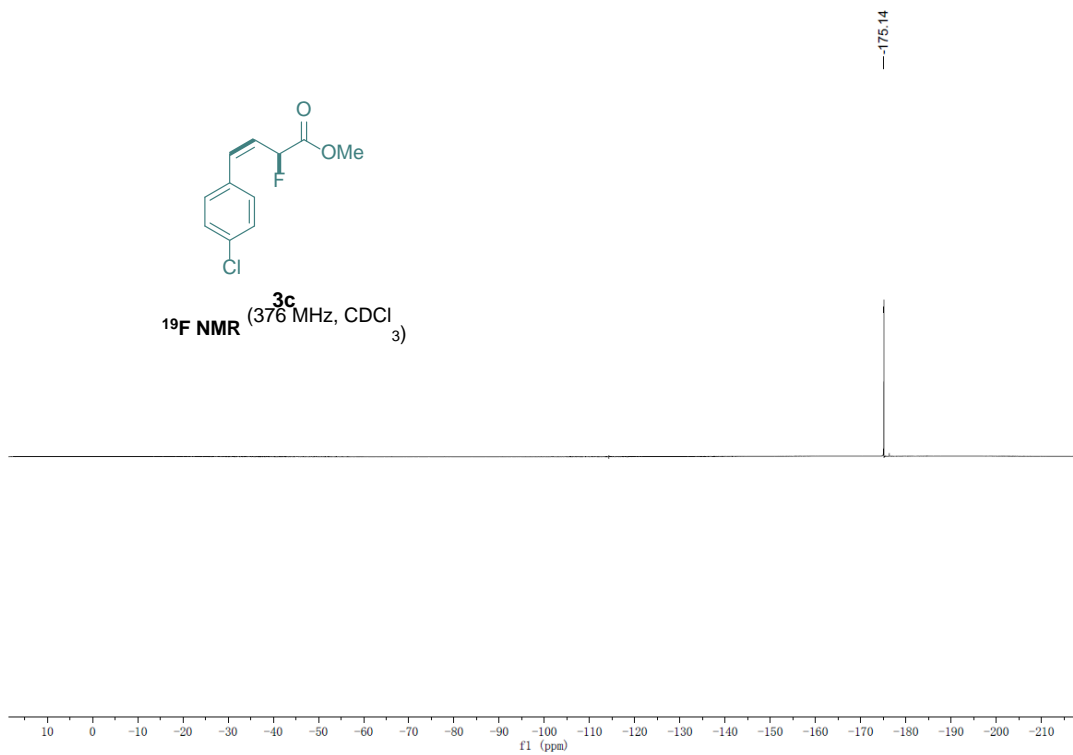

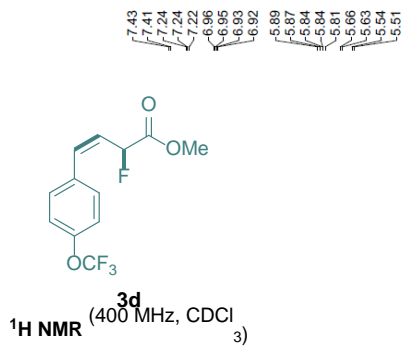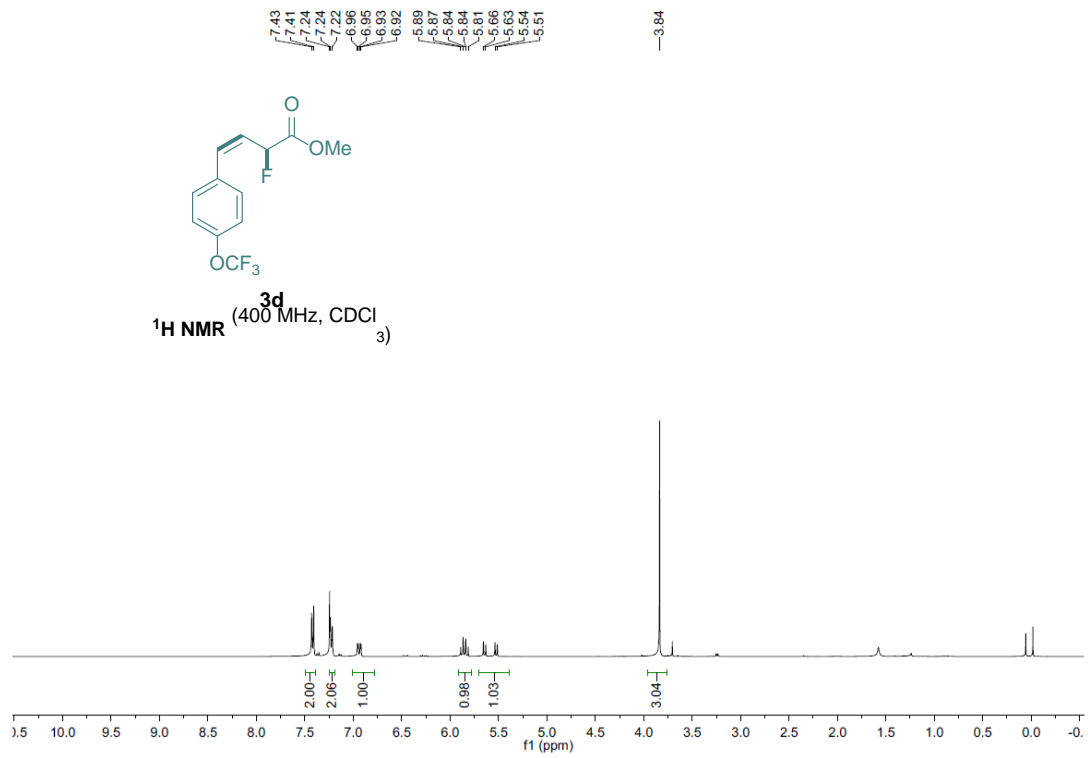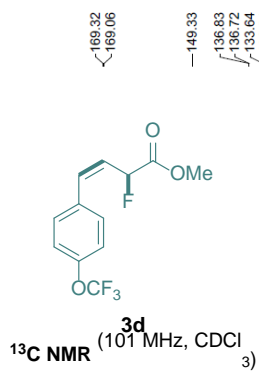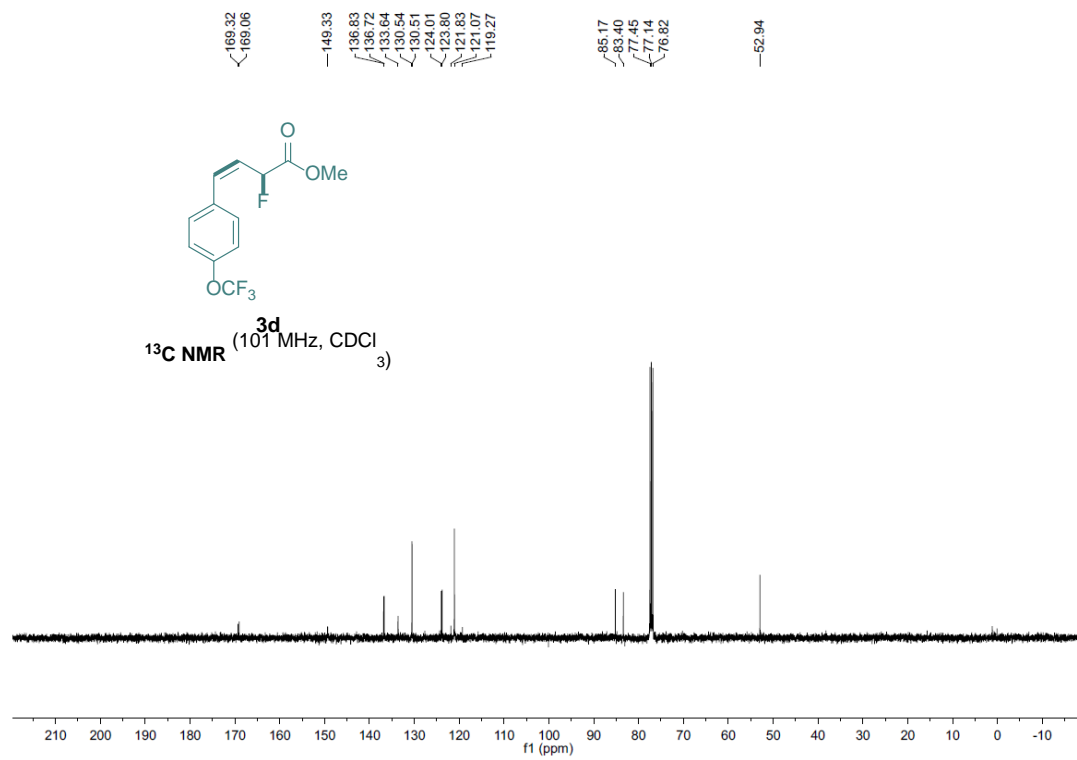

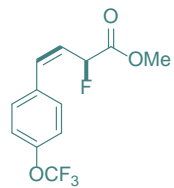

**3d**  
<sup>19</sup>F NMR (376 MHz, CDCl<sub>3</sub>)

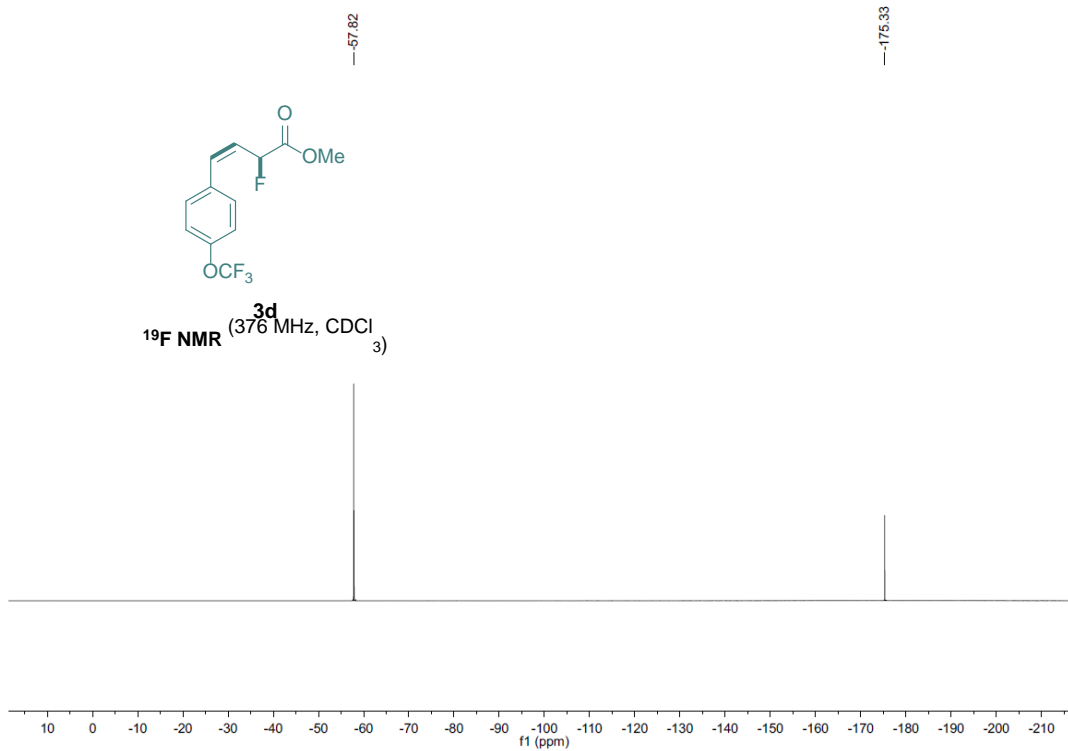



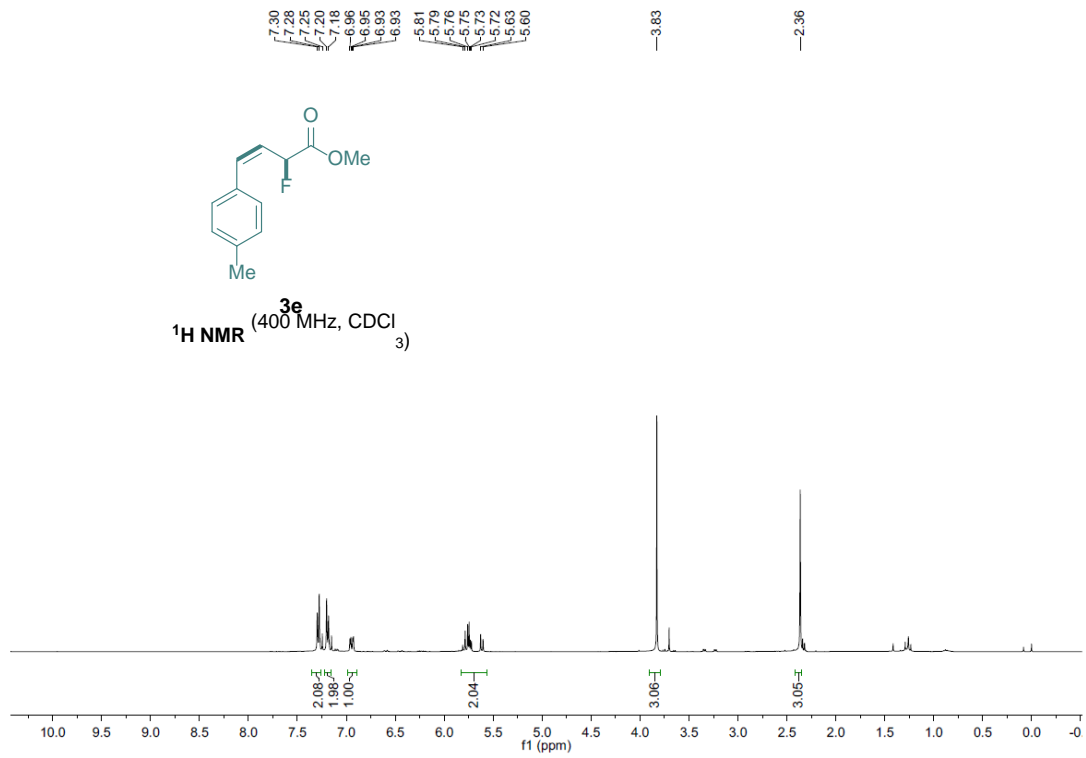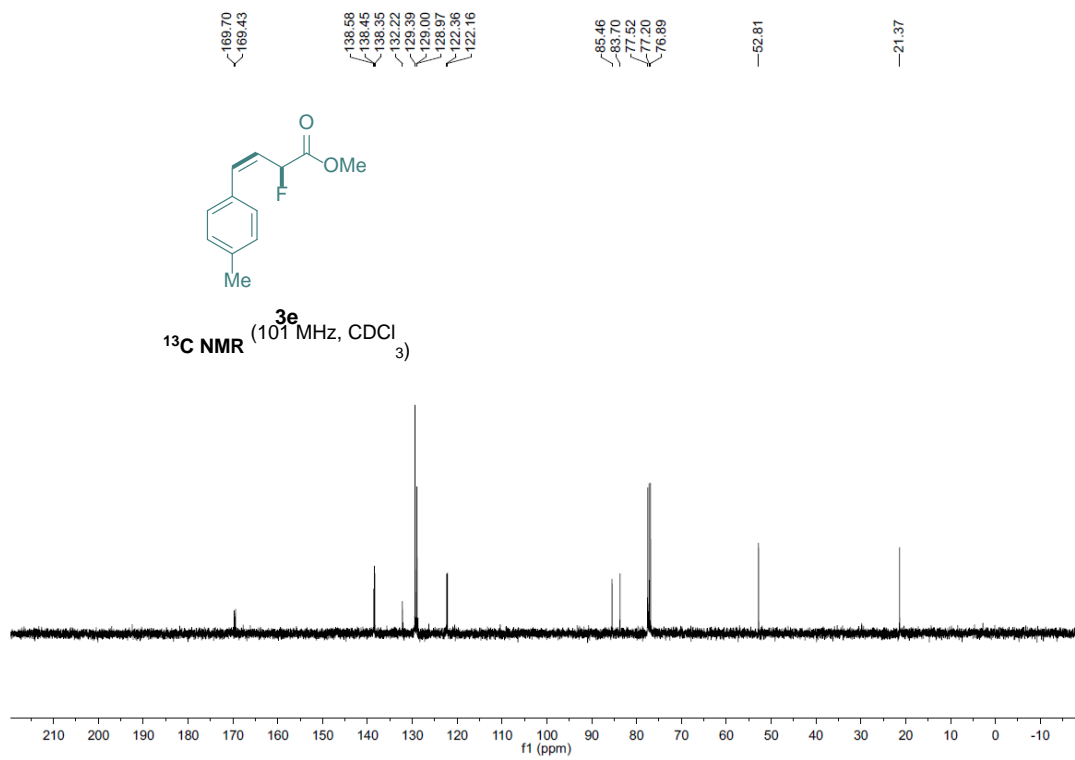

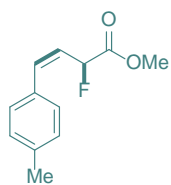

**<sup>19</sup>F NMR** (376 MHz, CDCl<sub>3</sub>)

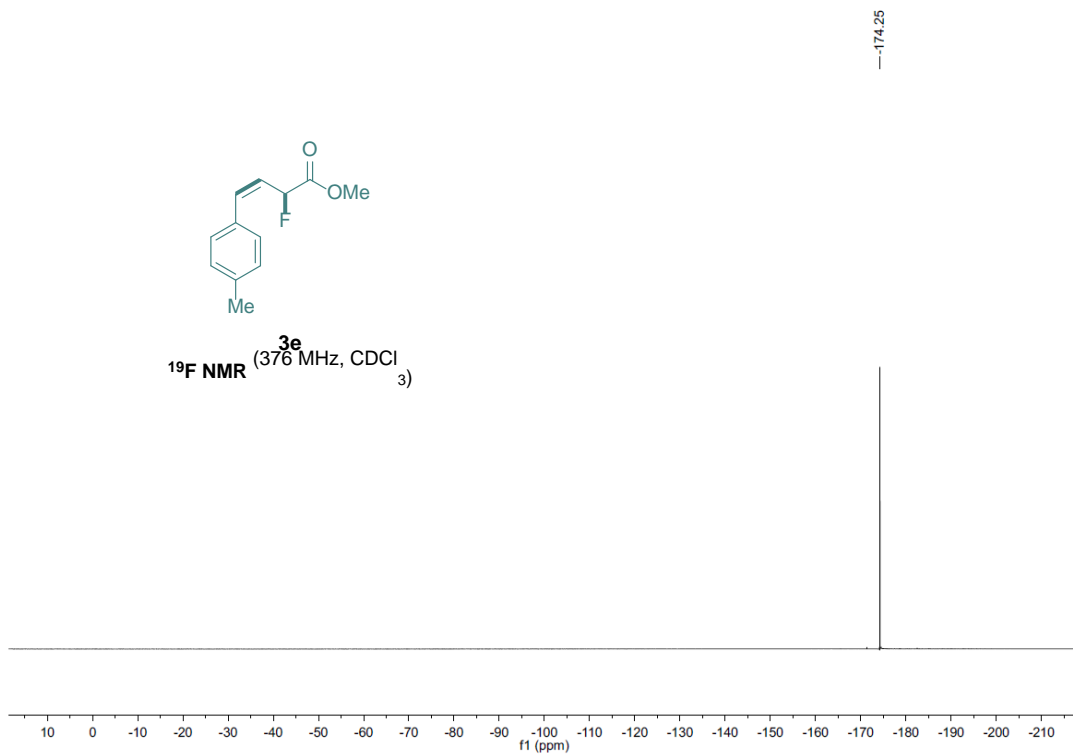

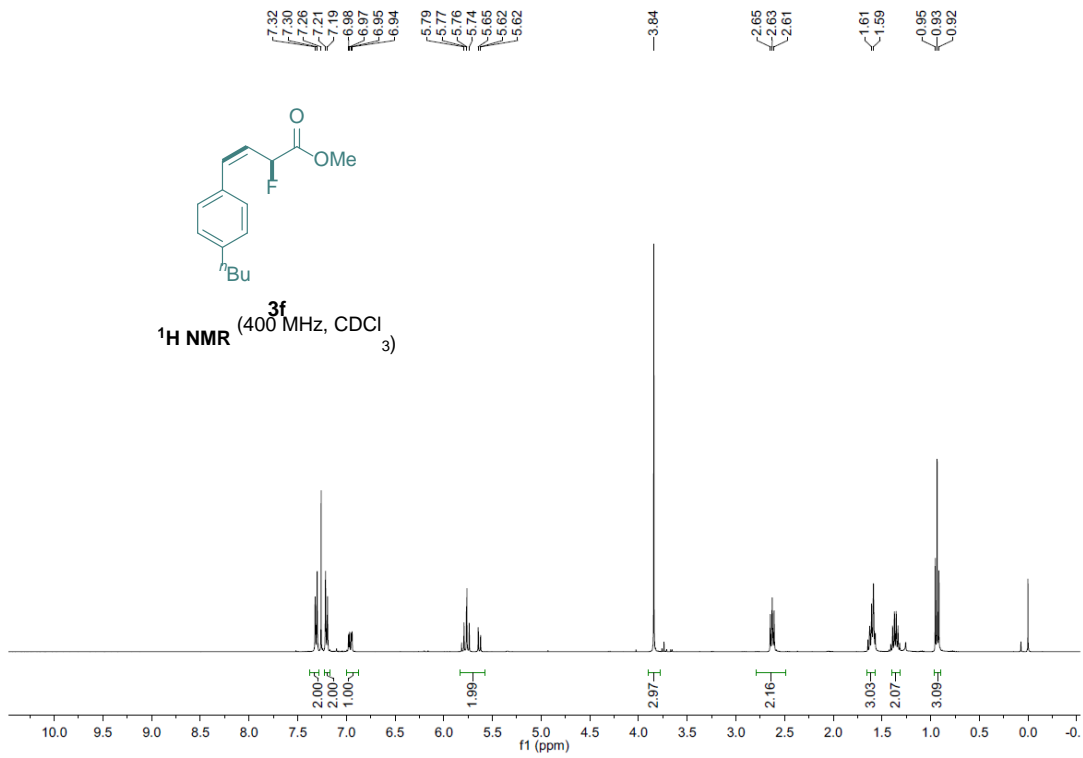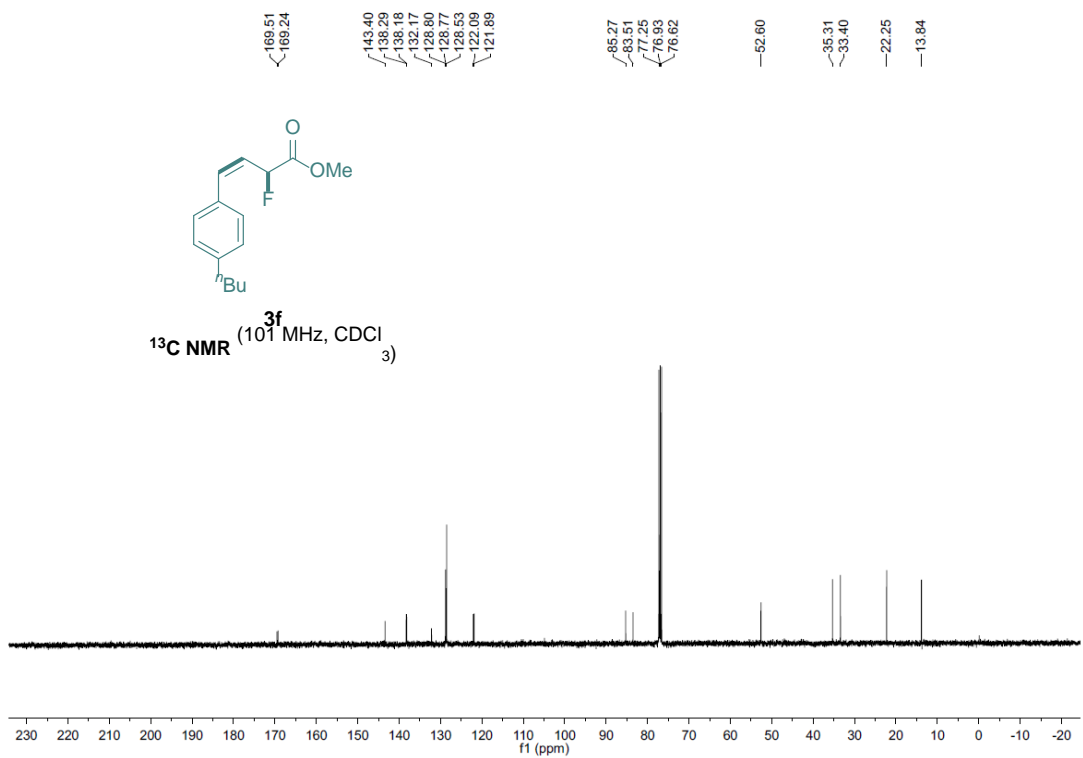

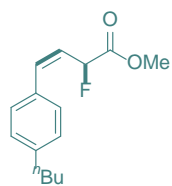

**3f**  
**<sup>19</sup>F NMR** (376 MHz, CDCl<sub>3</sub>)

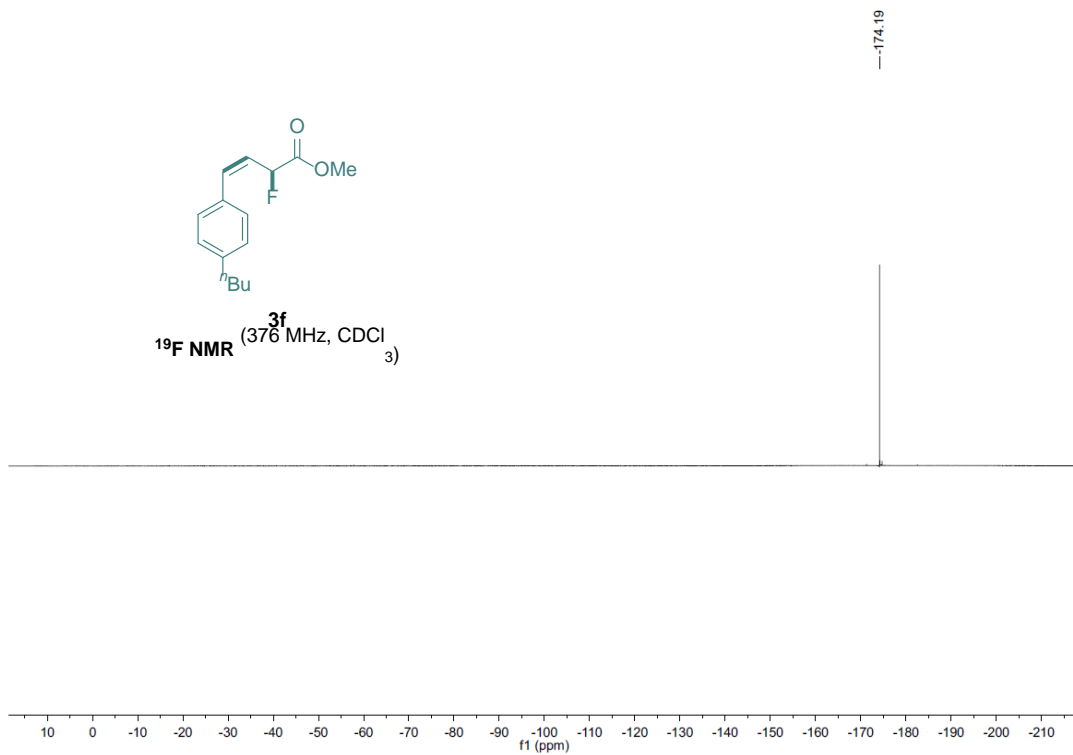

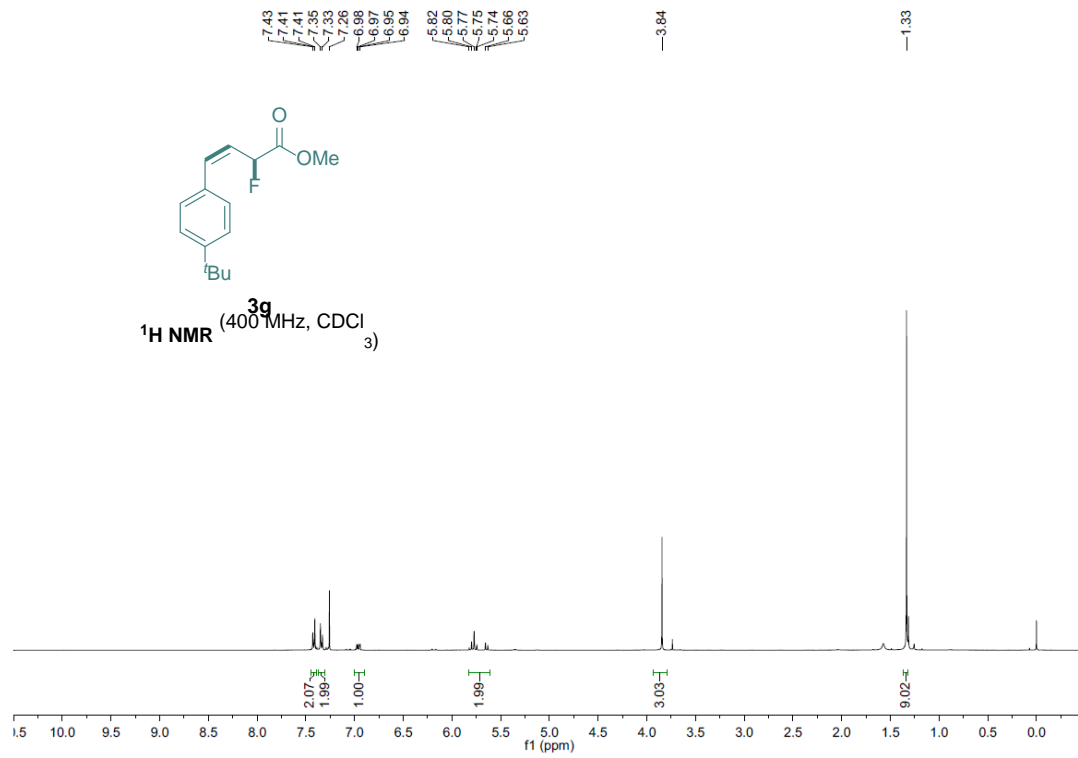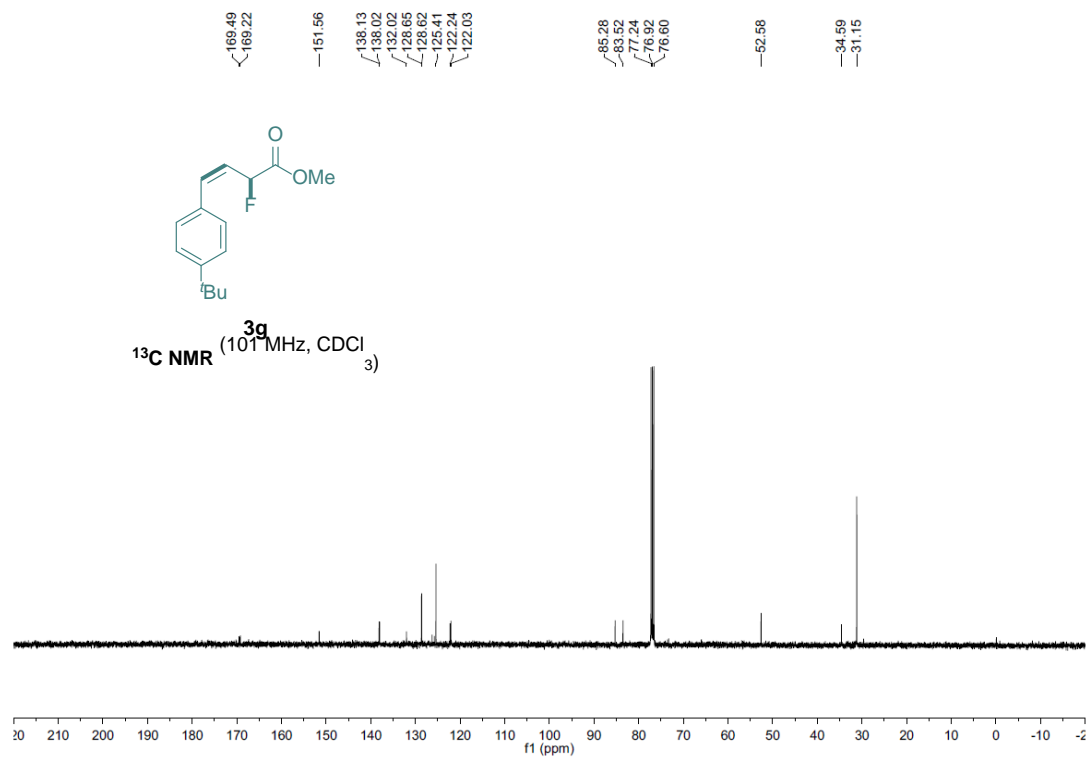

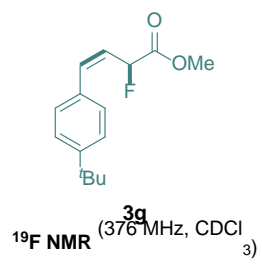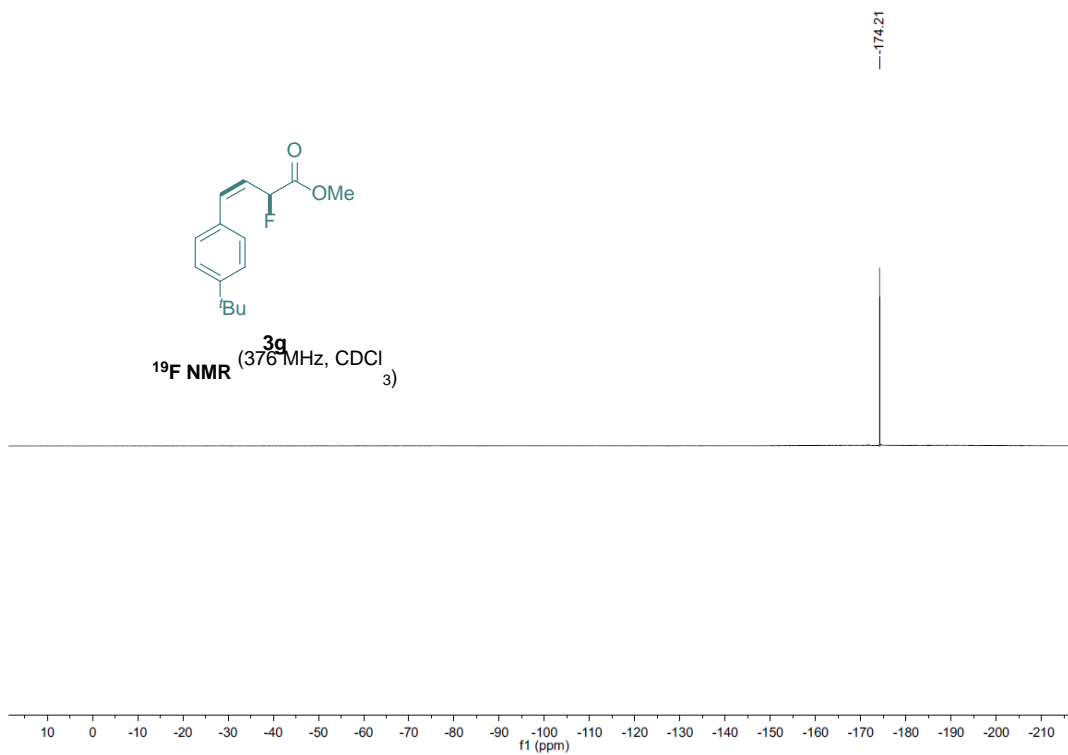

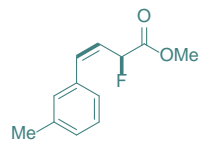

**3h**  
<sup>1</sup>H NMR (400 MHz, CDCl<sub>3</sub>)

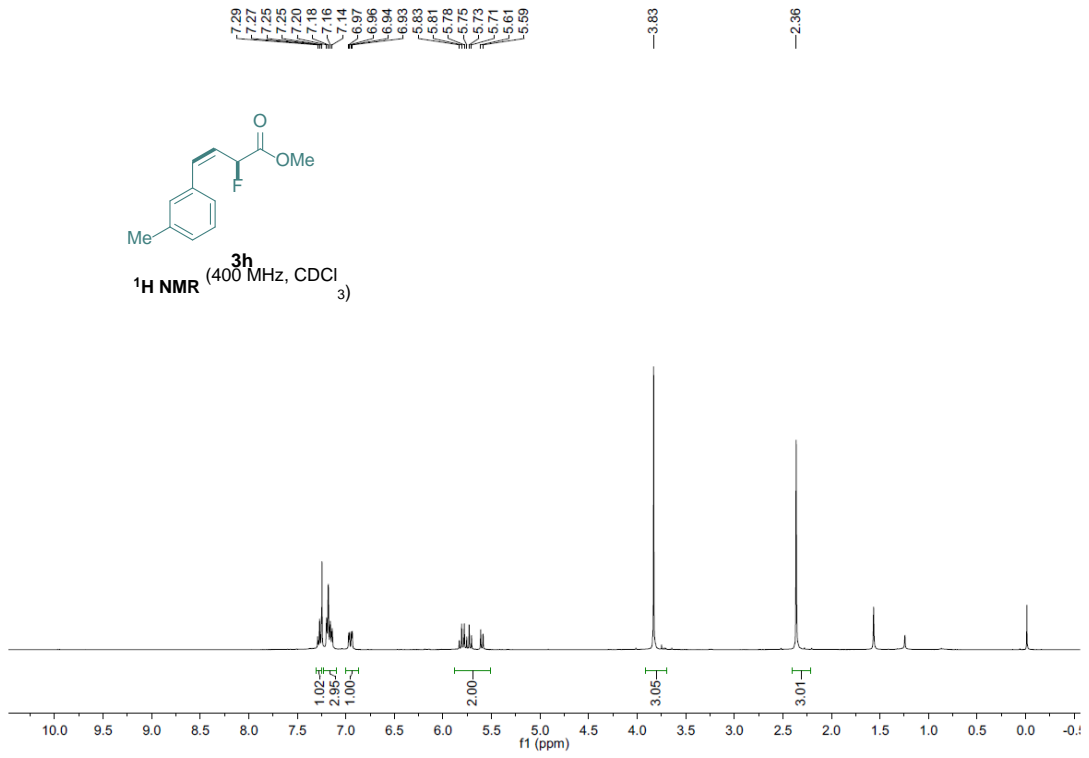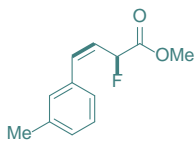

**3h**  
<sup>13</sup>C NMR (101 MHz, CDCl<sub>3</sub>)

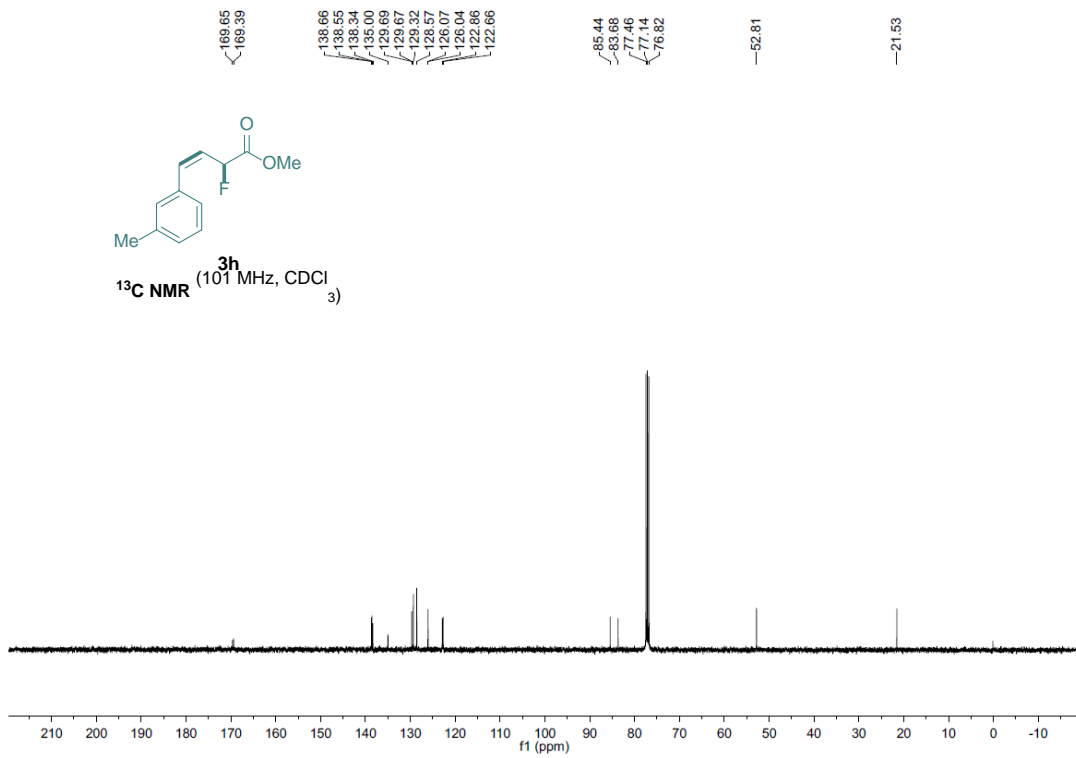

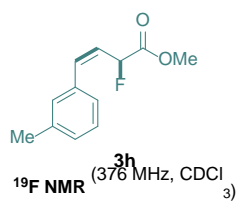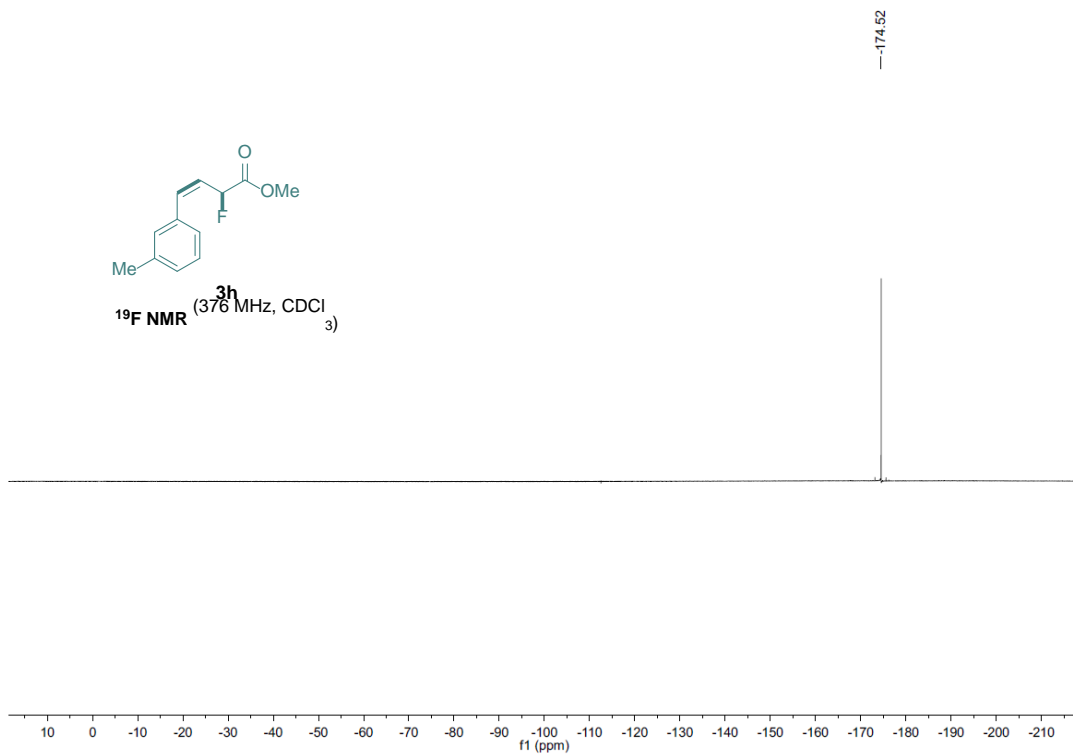



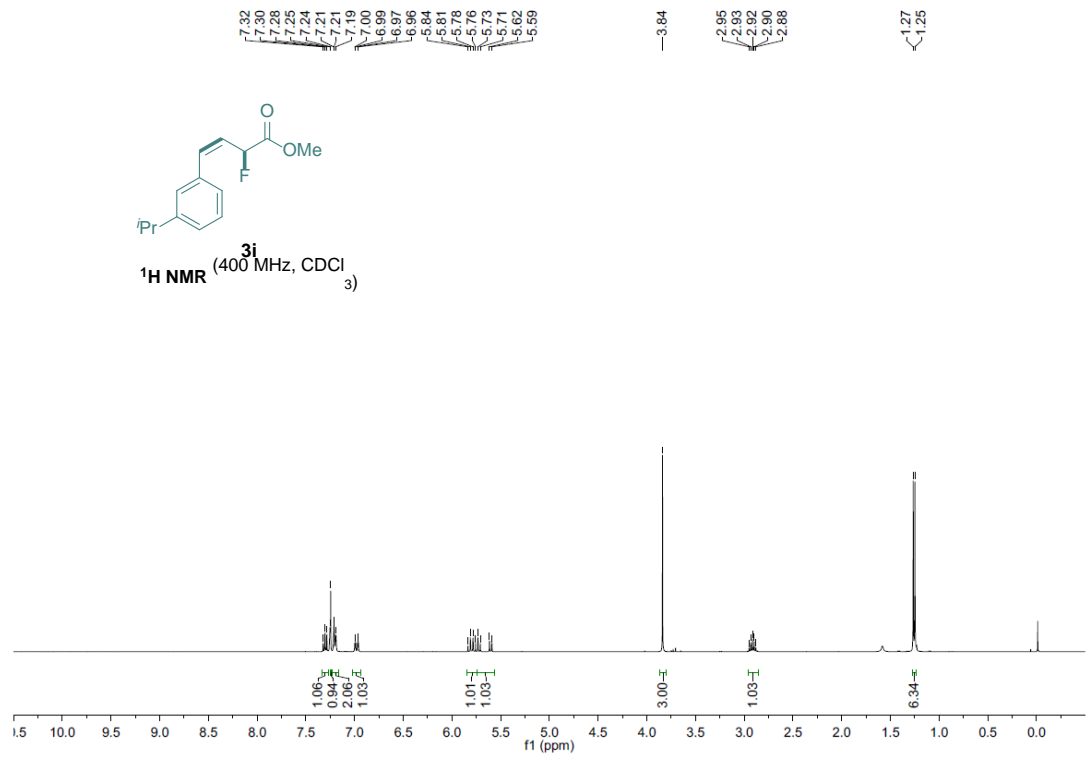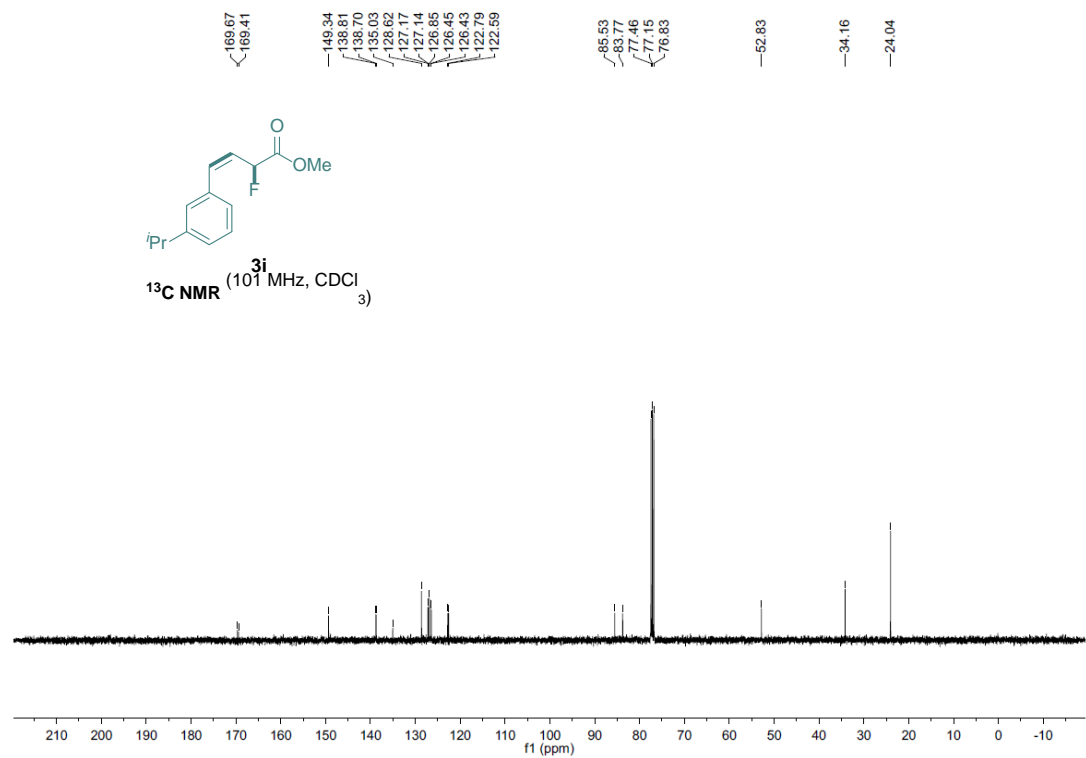

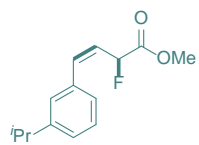

<sup>19</sup>F NMR (376 MHz, CDCl<sub>3</sub>)

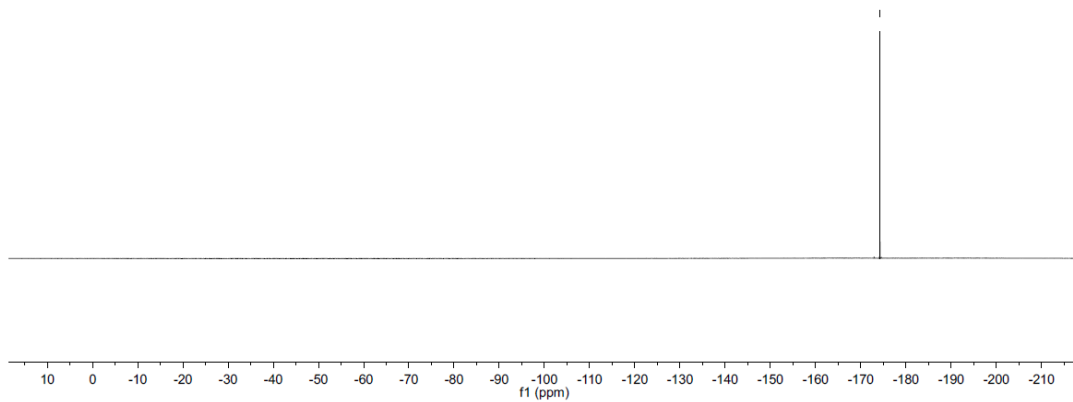

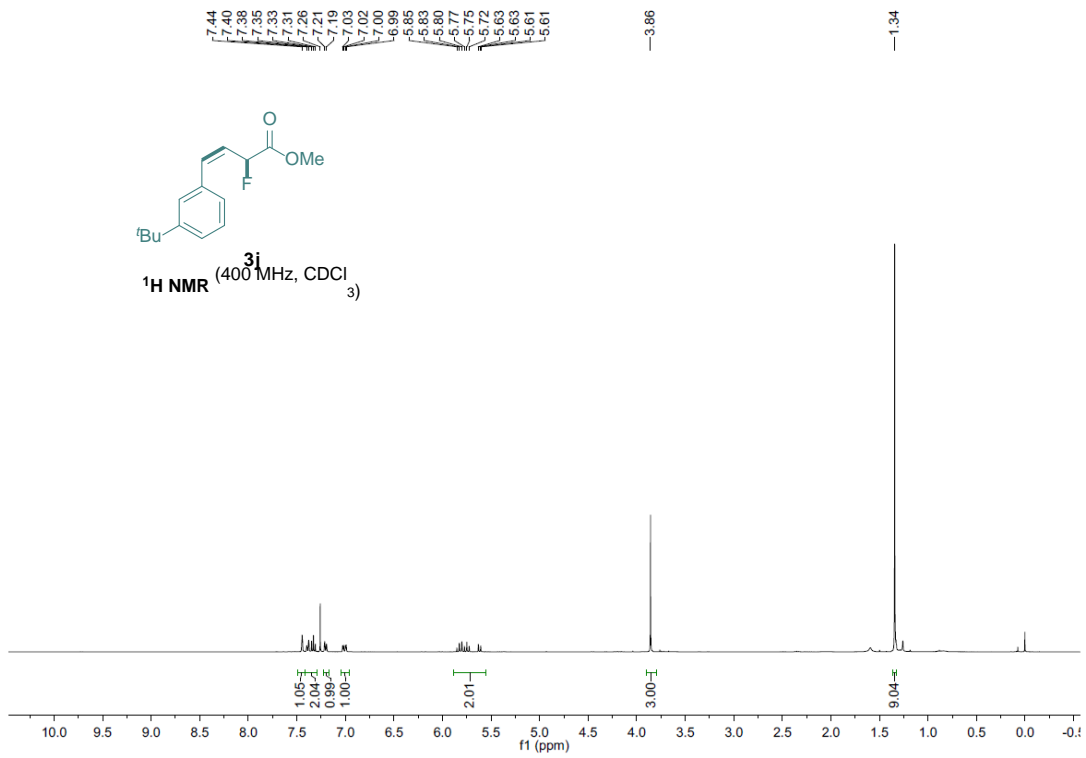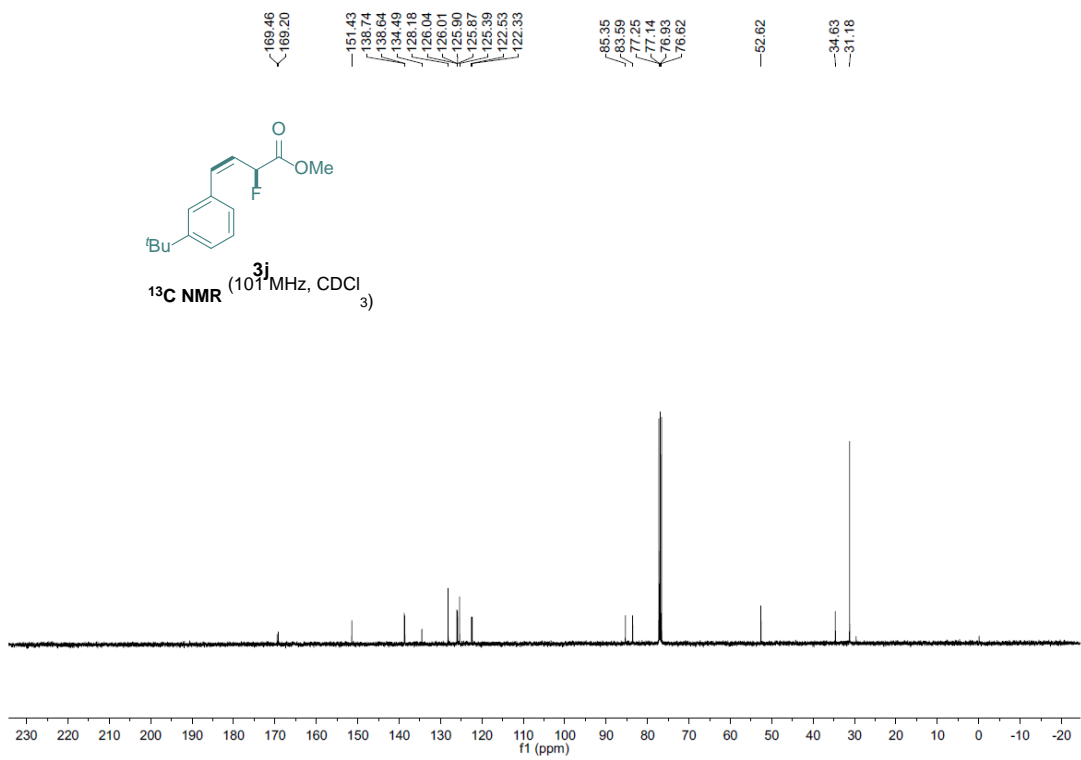

-174.14

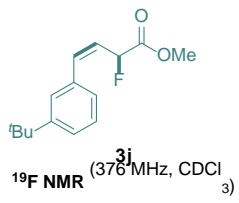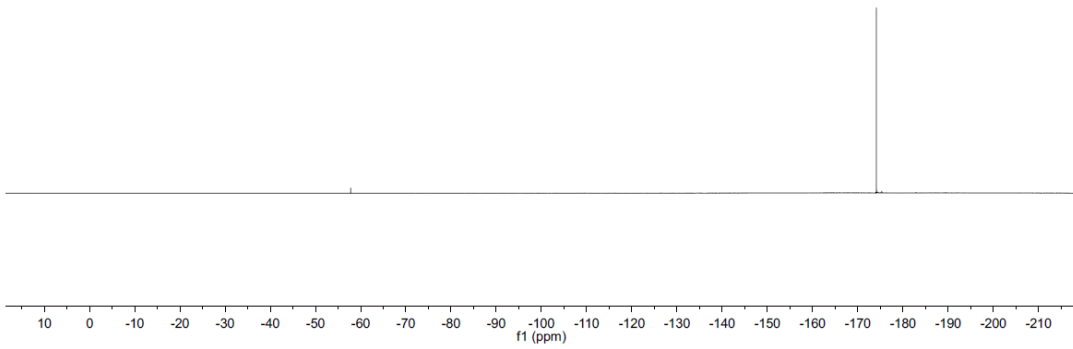

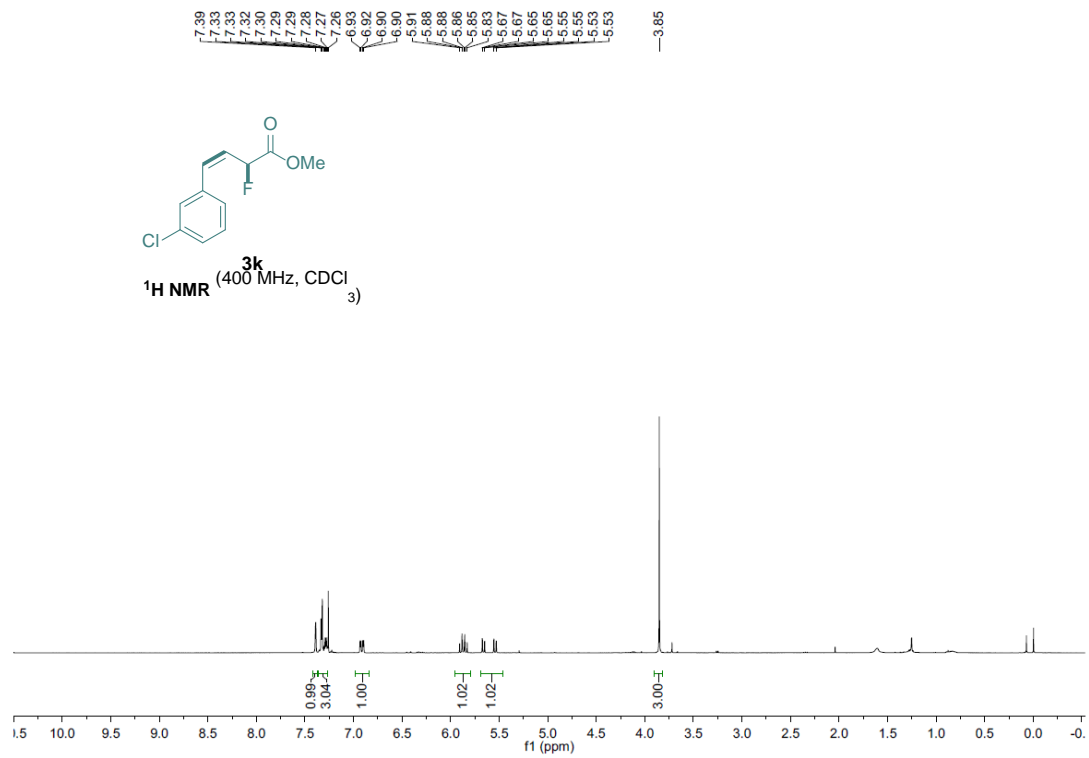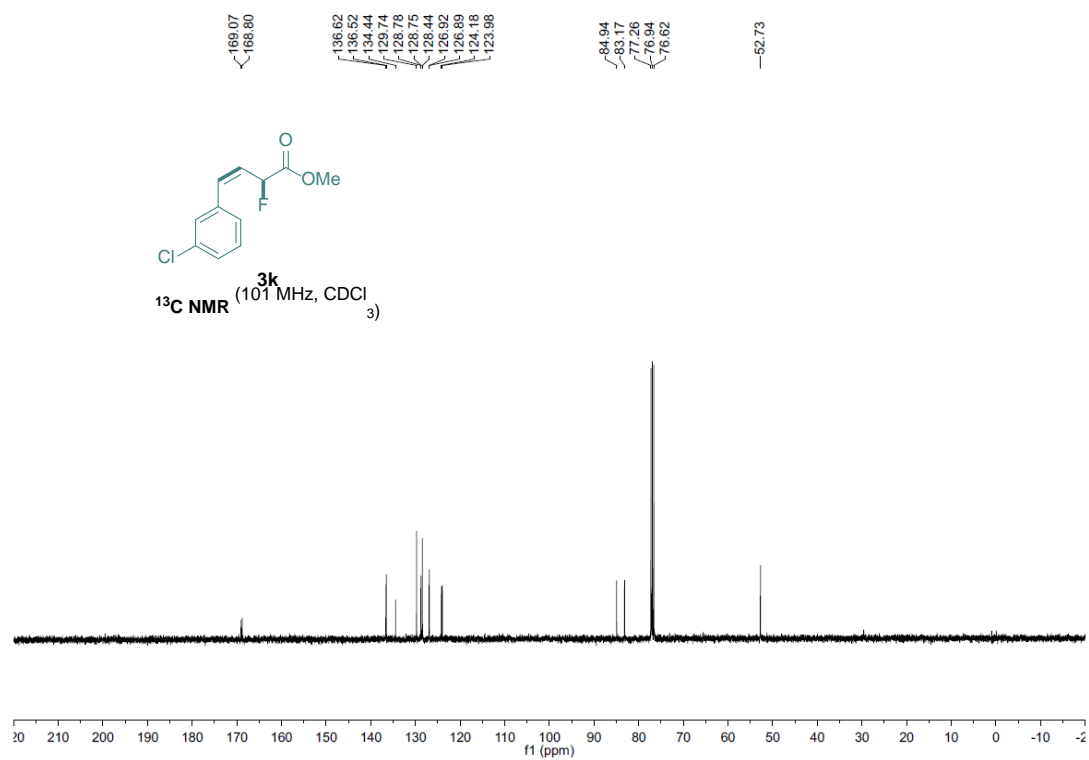

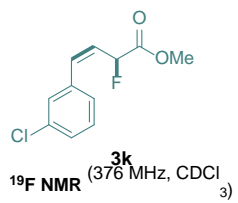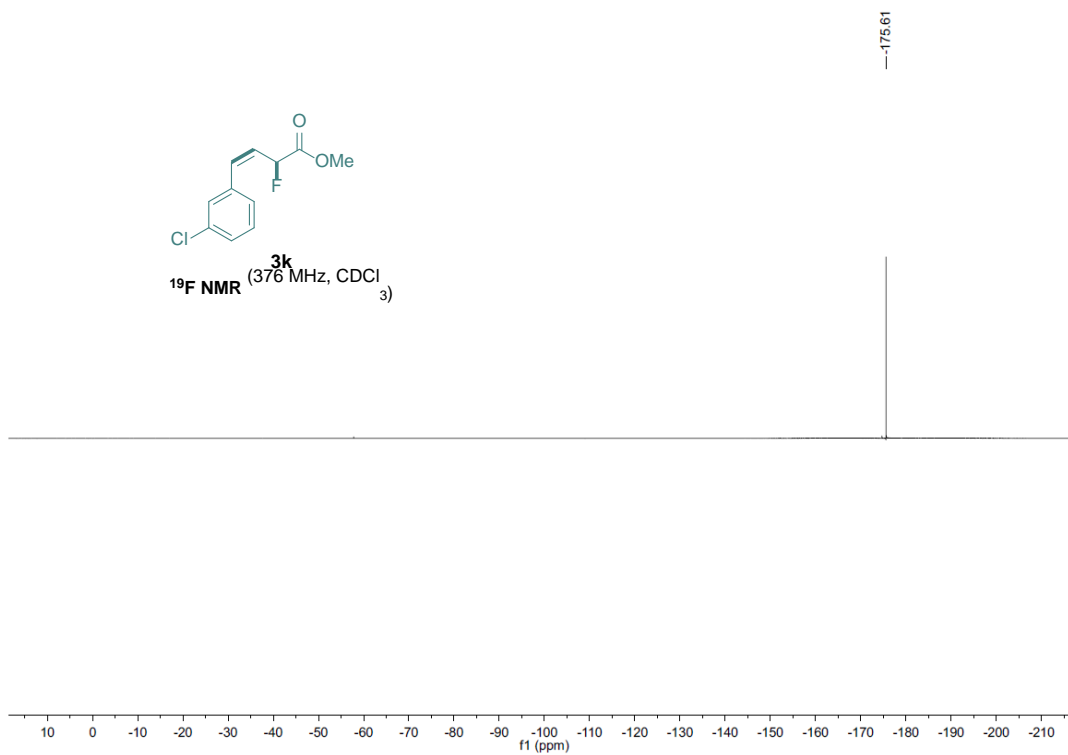

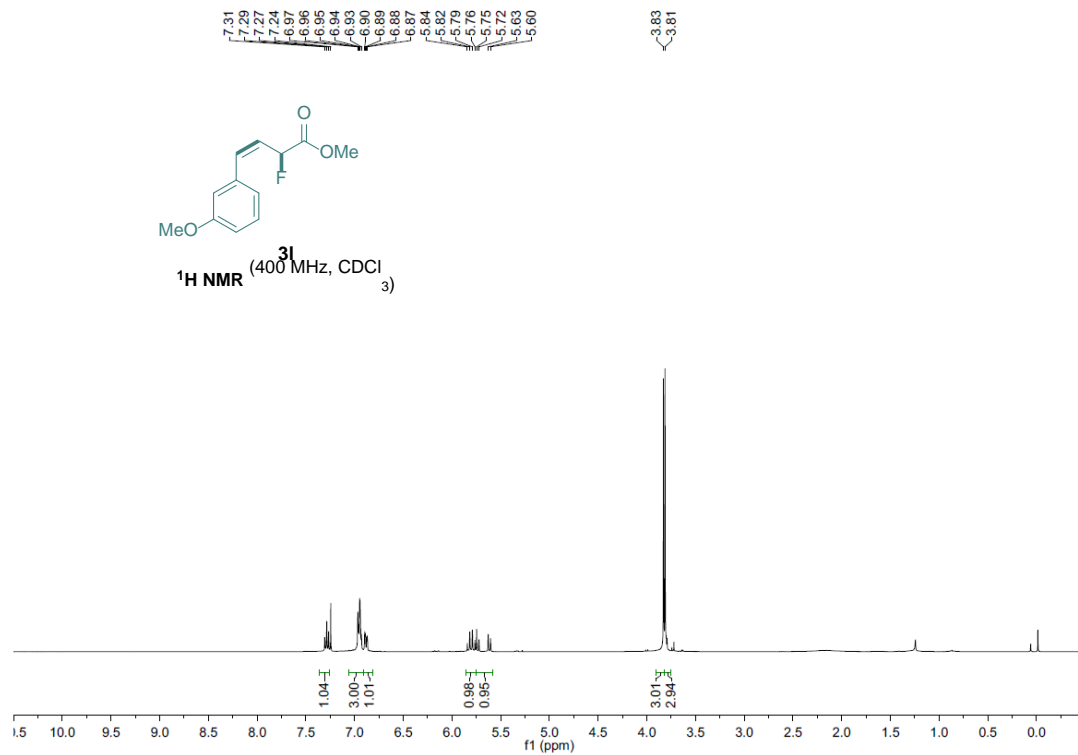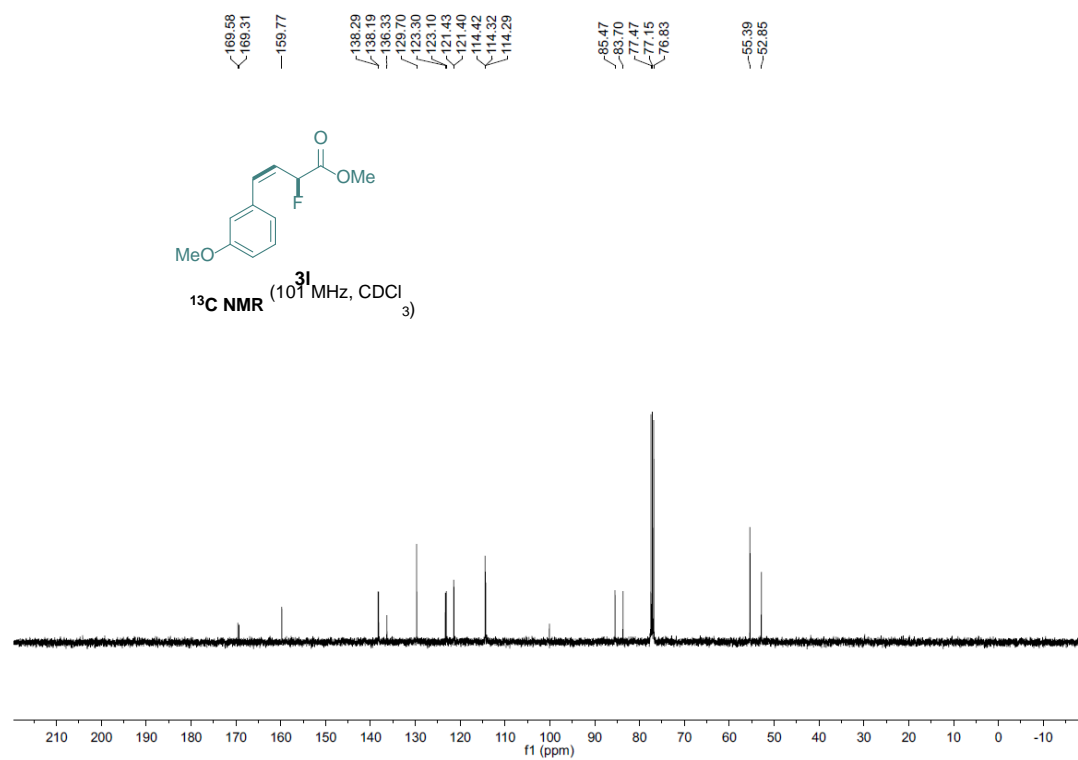

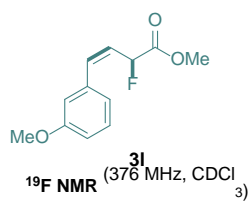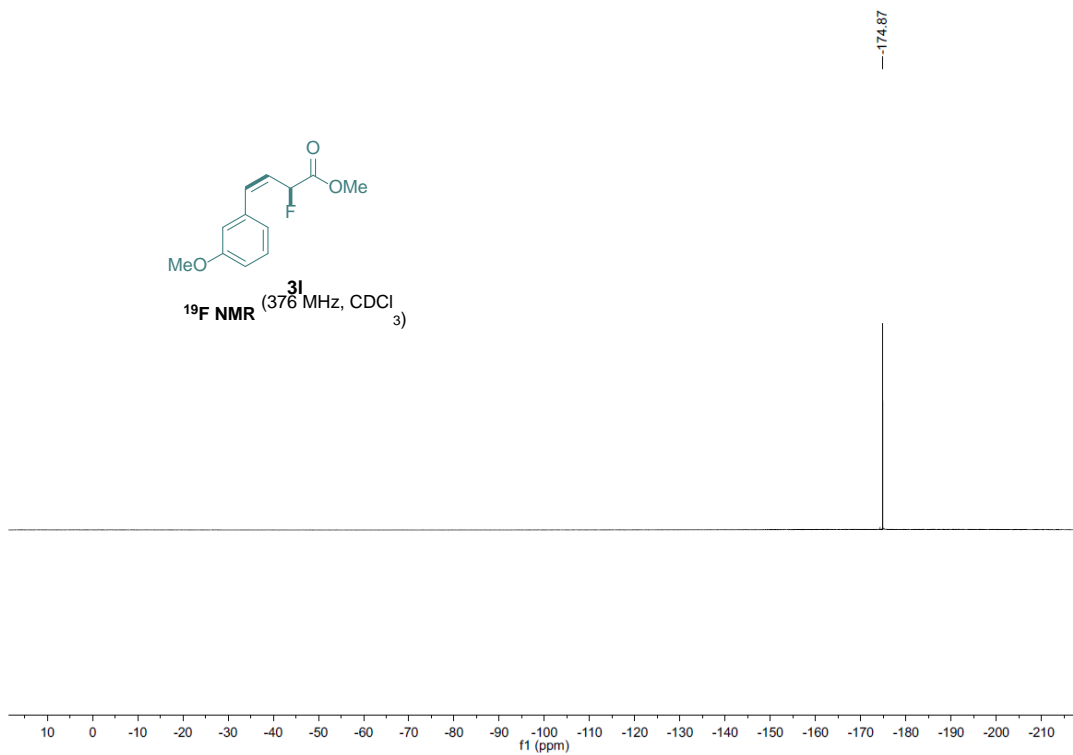



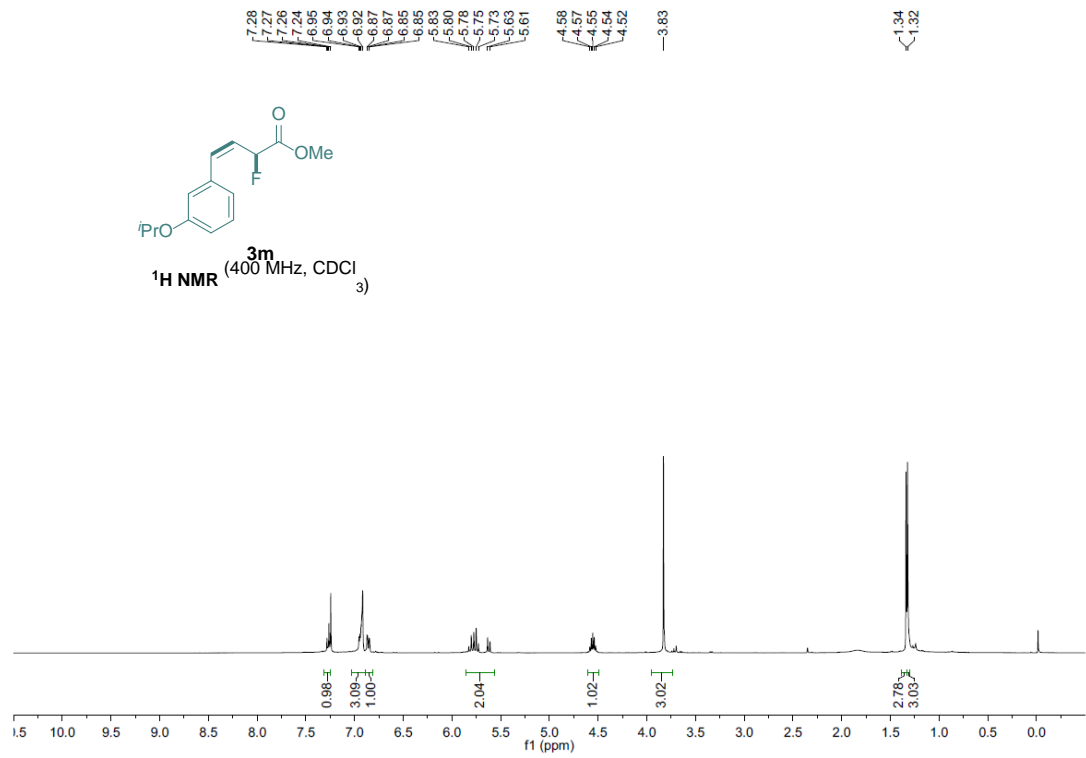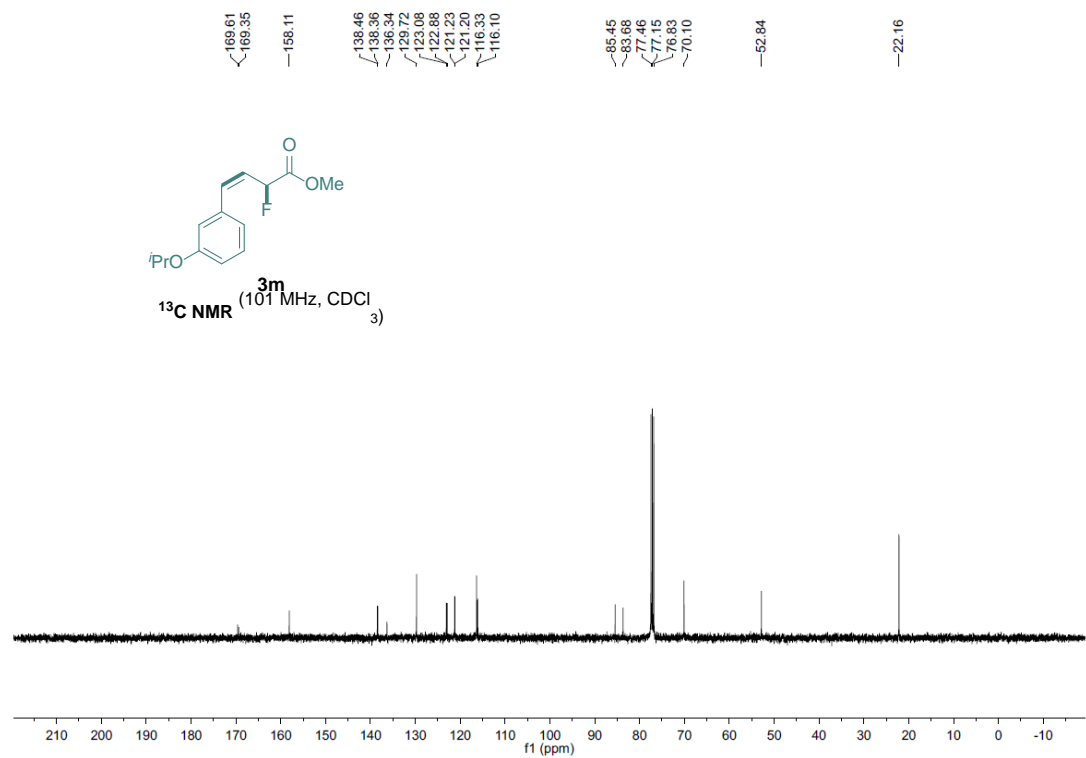

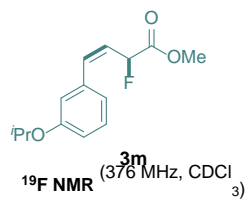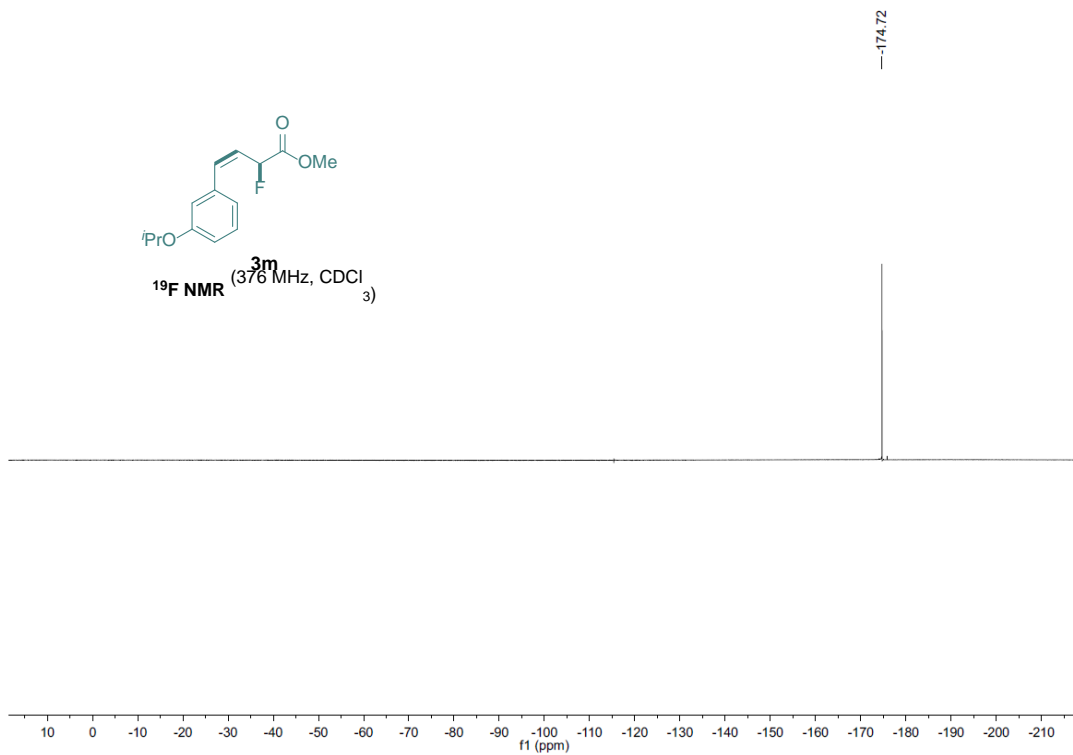

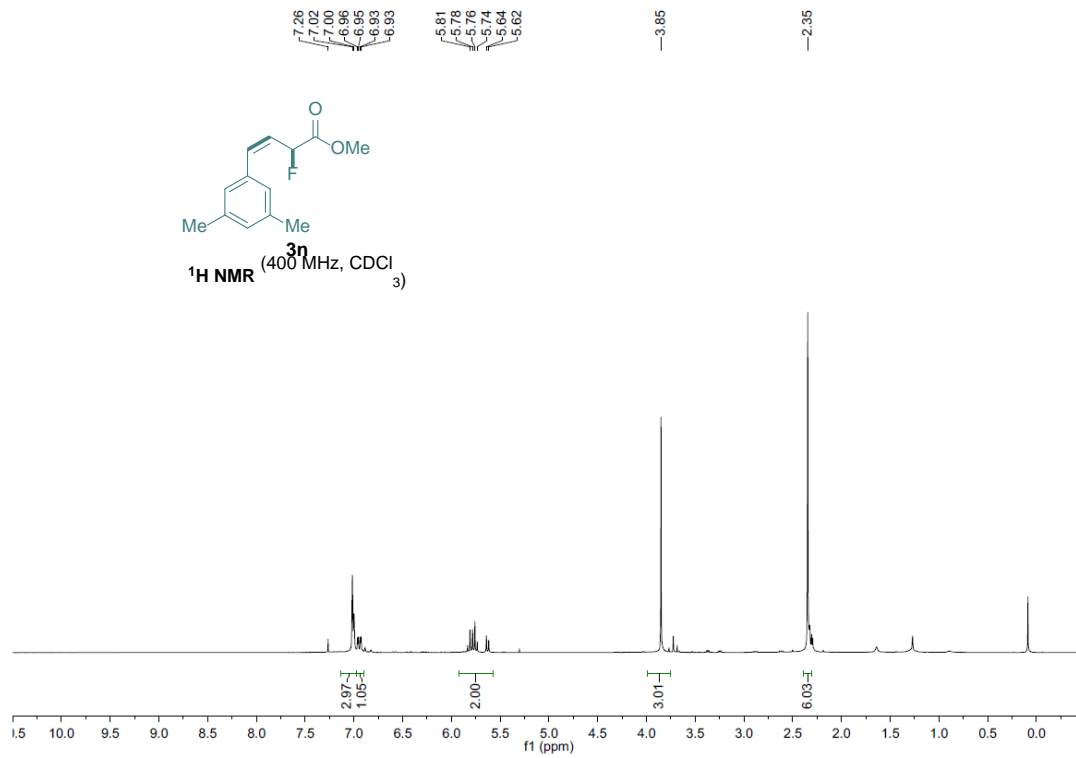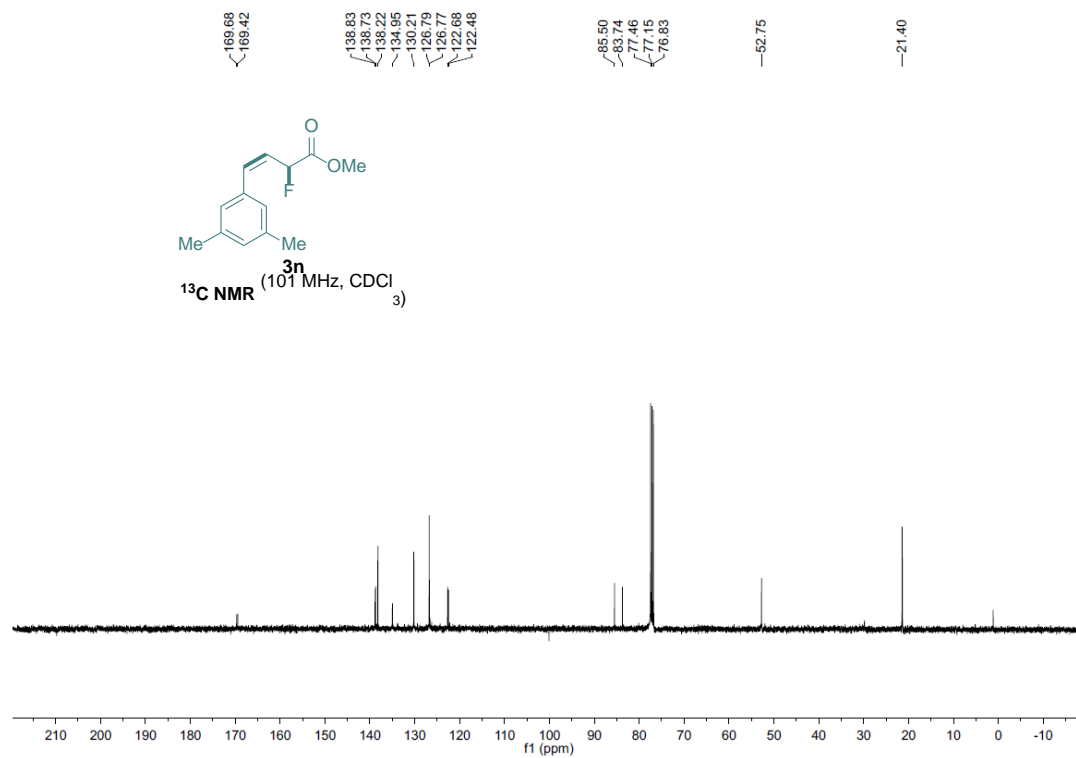

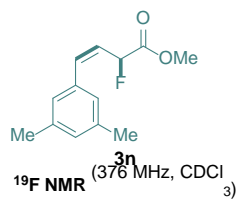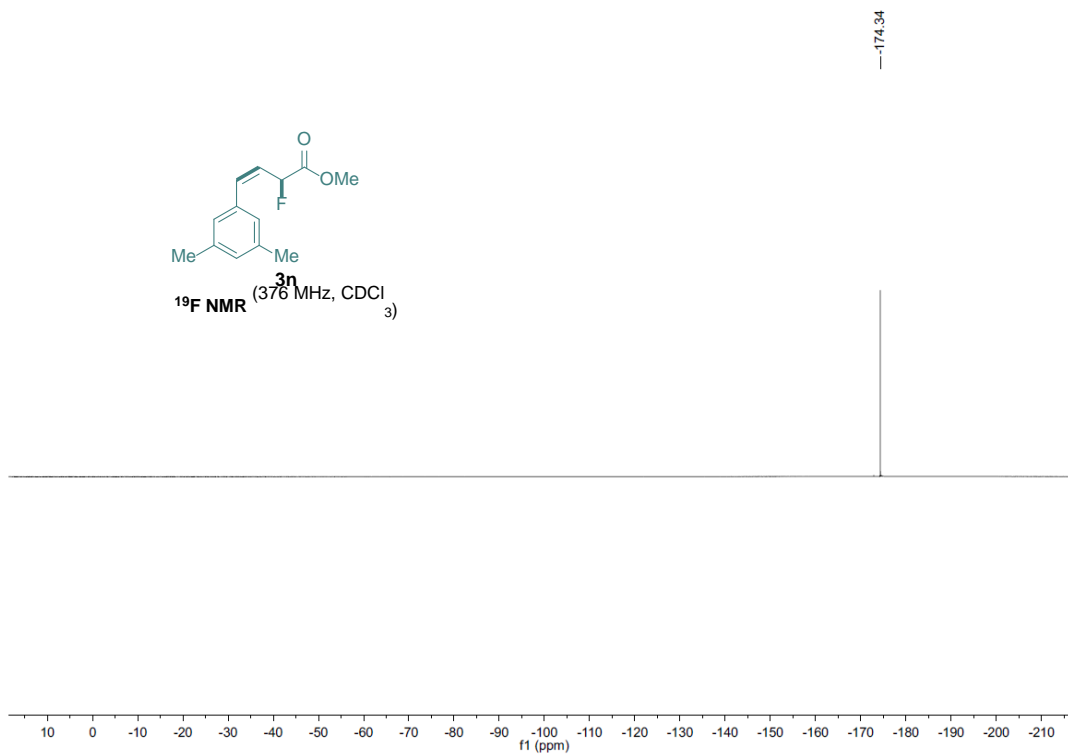

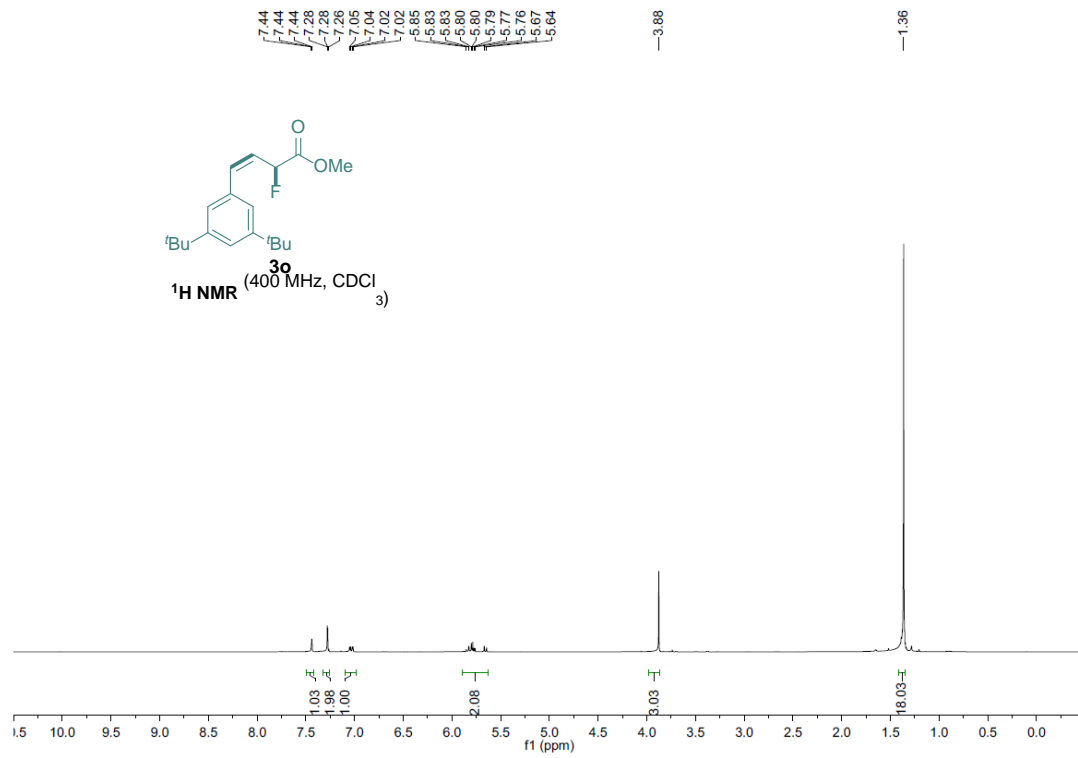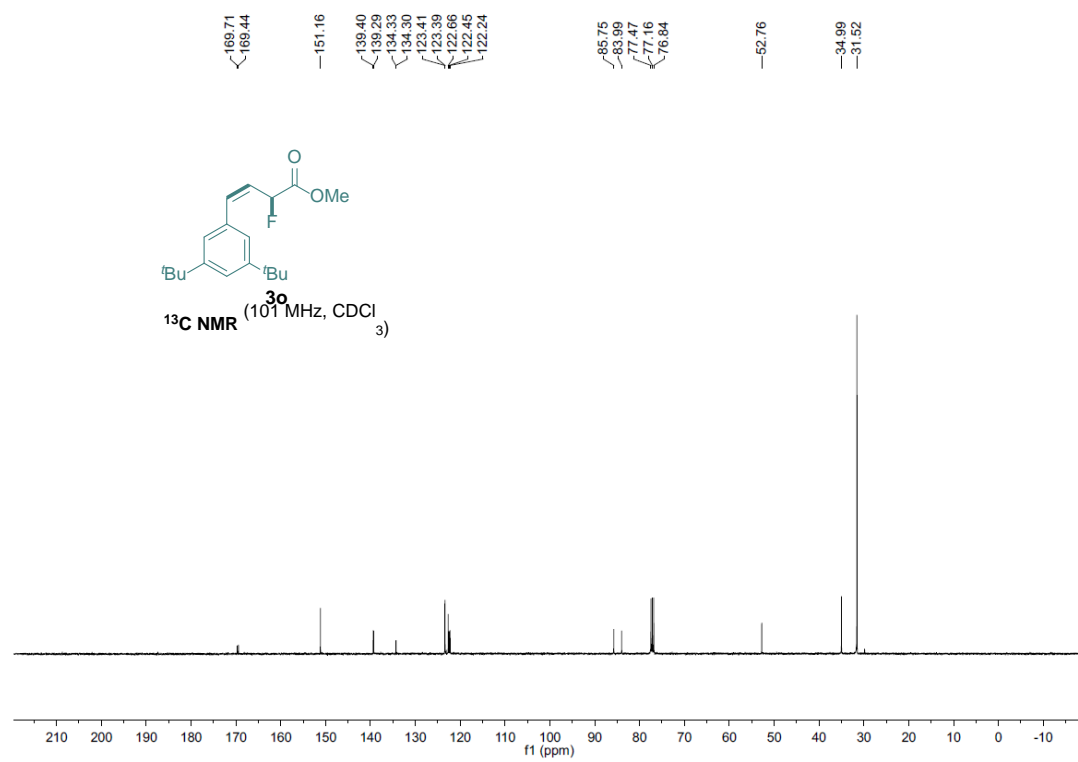

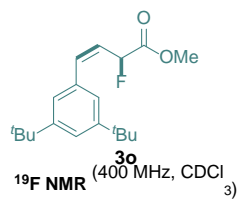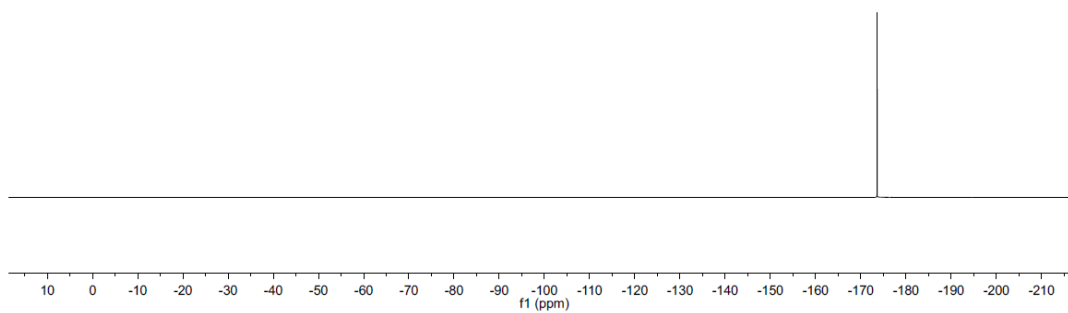

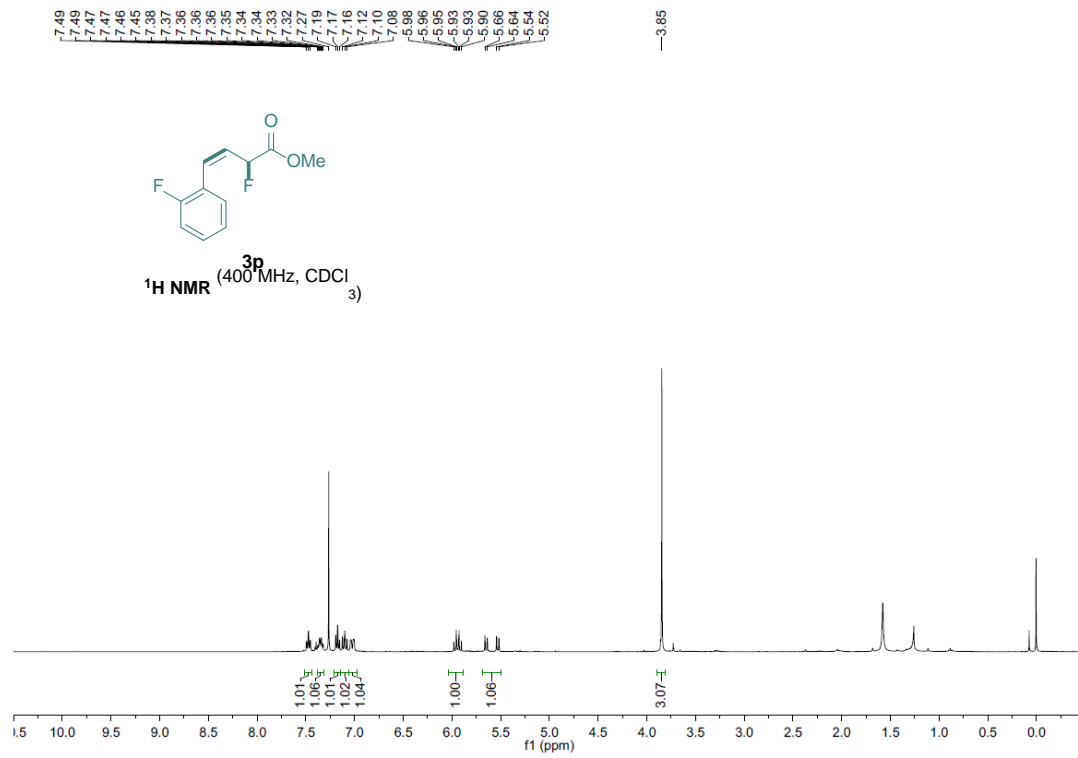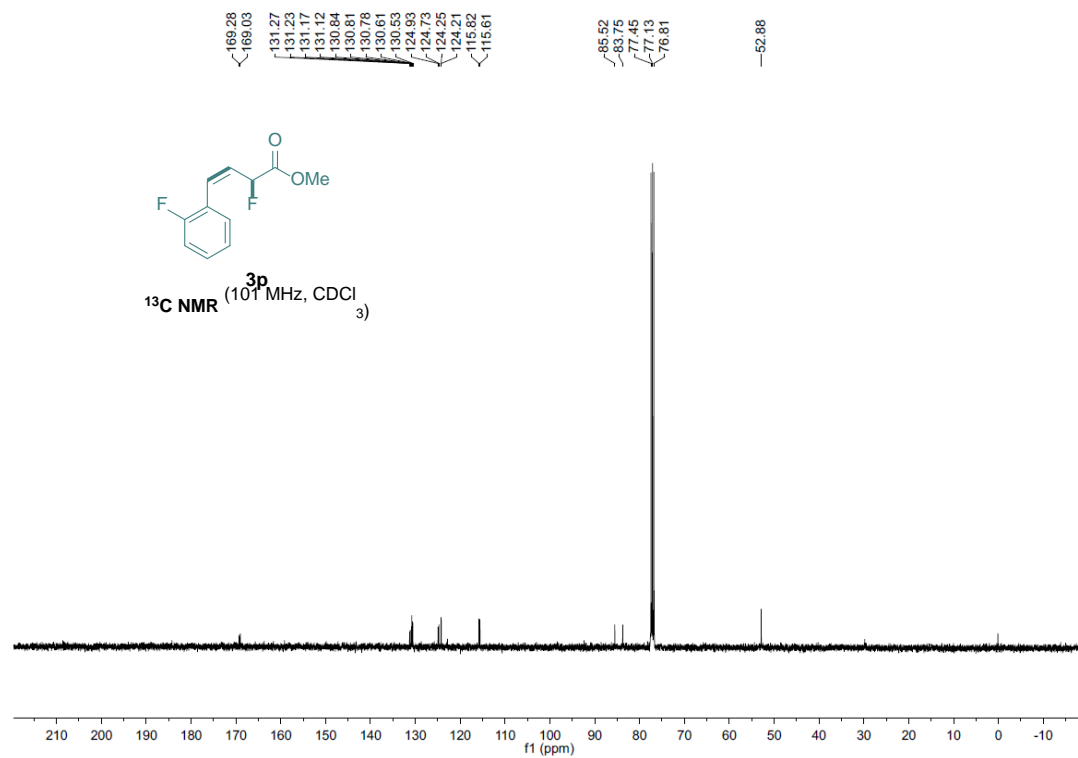

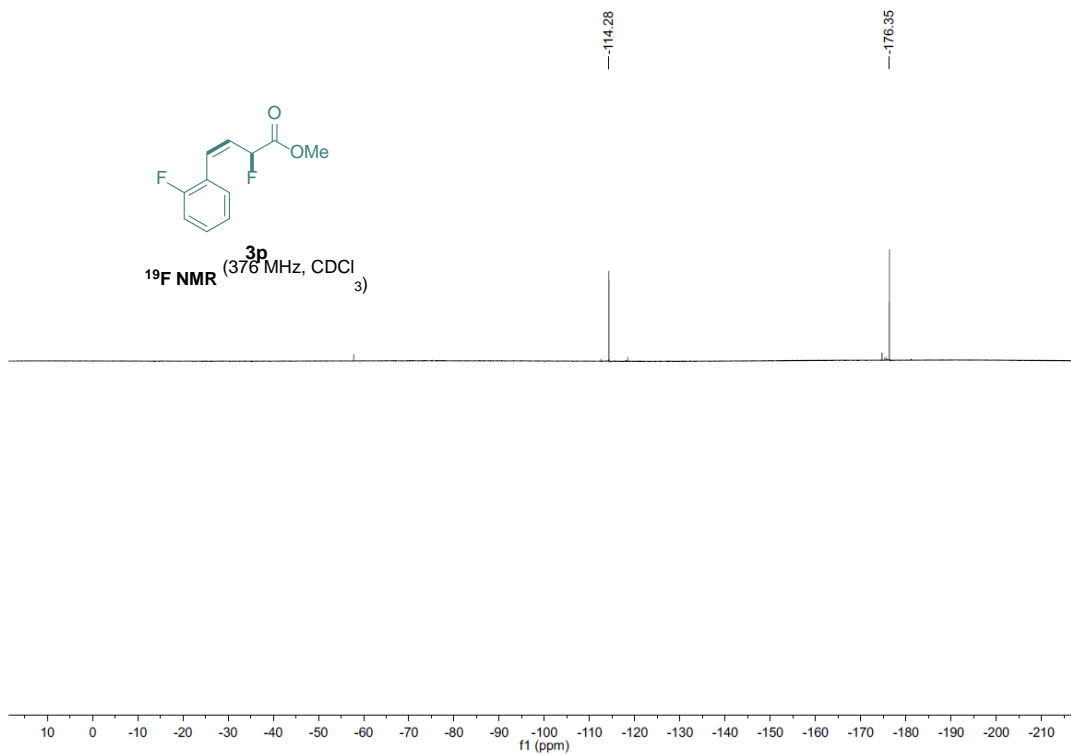



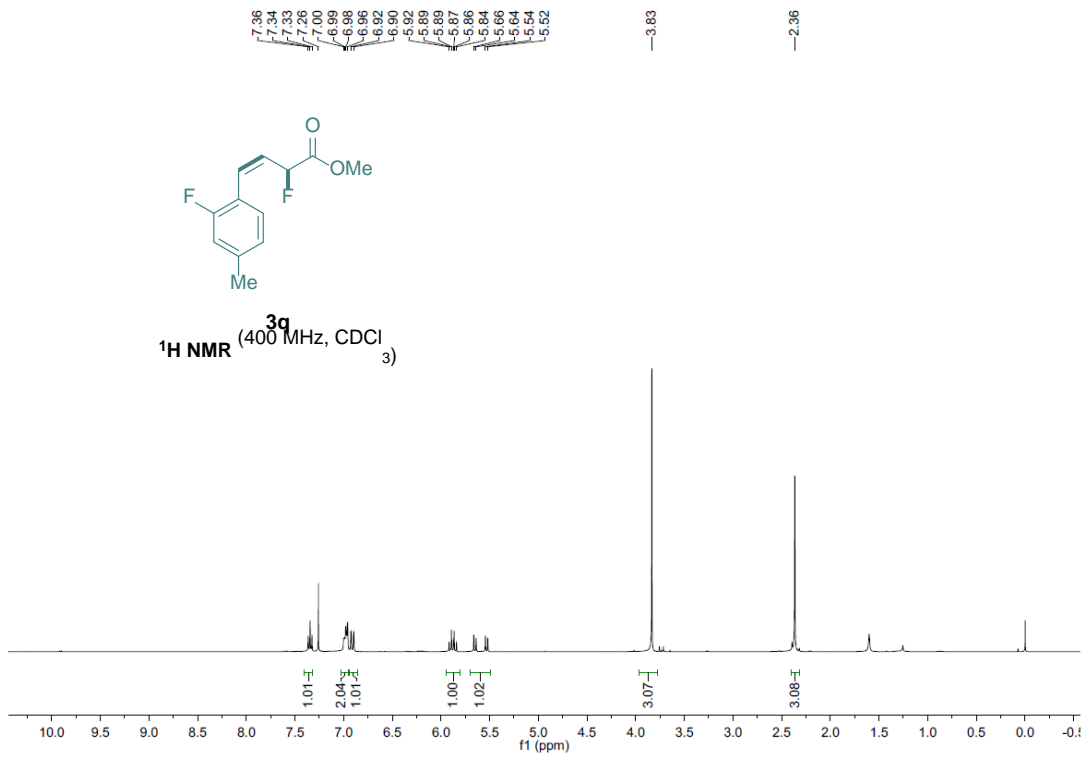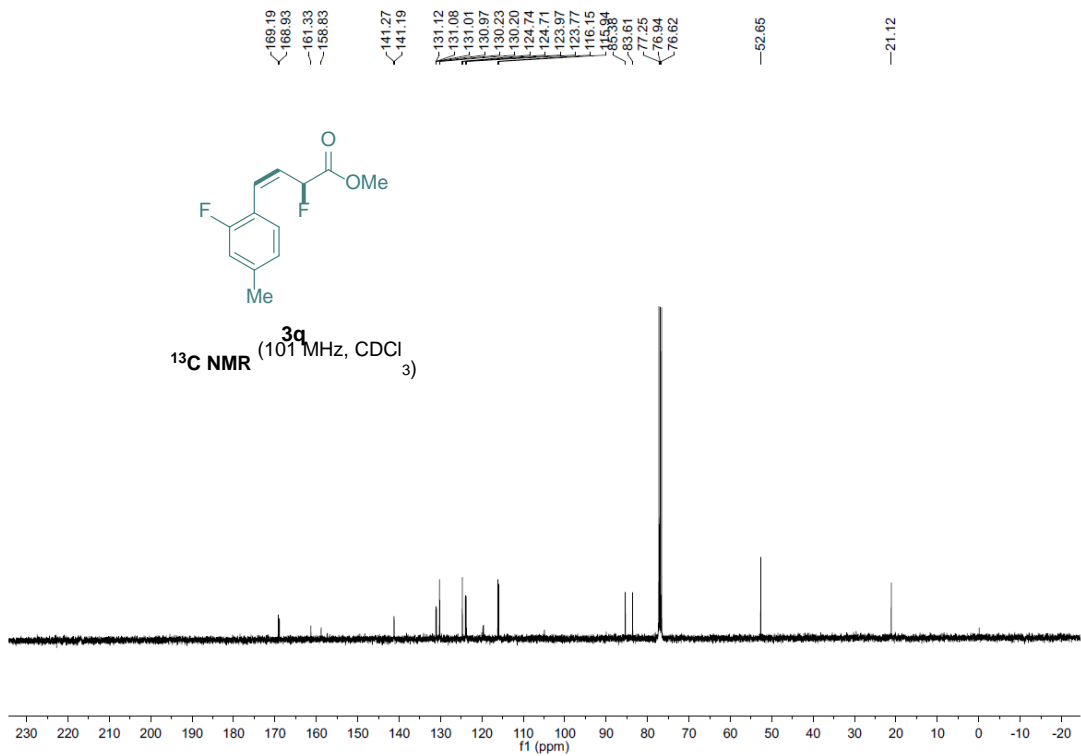

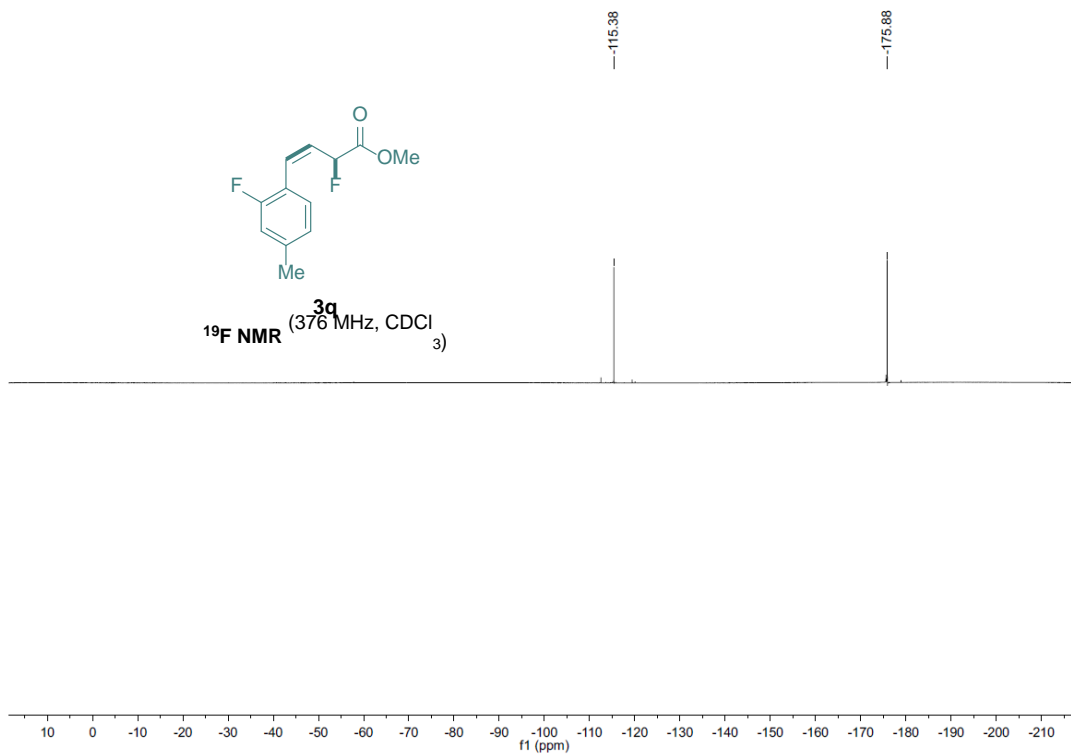

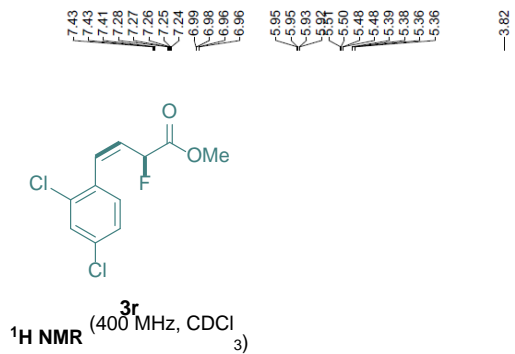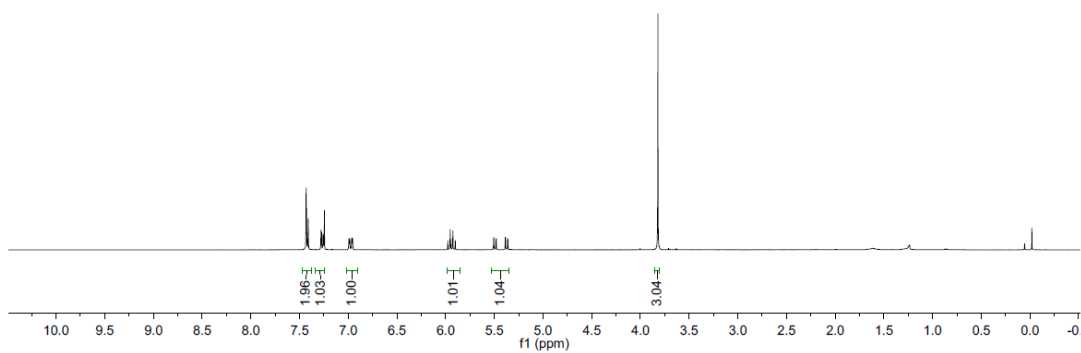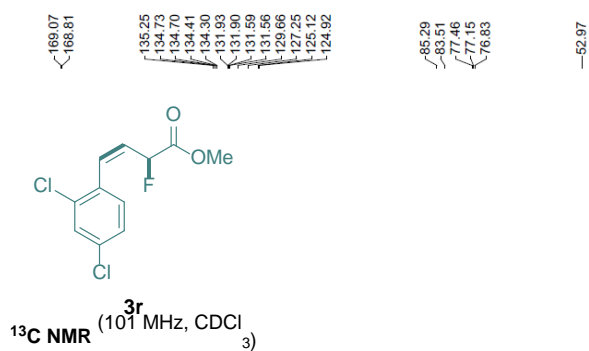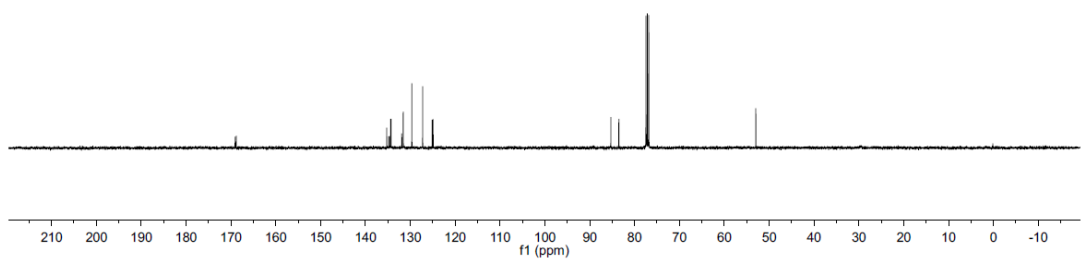

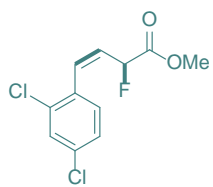

**<sup>19</sup>F NMR** (<sup>3</sup>r  
(376 MHz, CDCl<sub>3</sub>)

---176.83

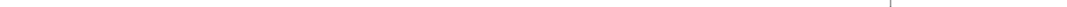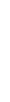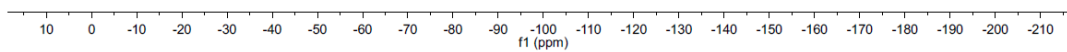

7.42  
7.42  
7.41  
7.39  
7.38  
7.37  
7.36  
7.13  
7.13  
7.11  
7.09  
6.99  
6.96  
6.00  
5.99  
5.97  
5.81  
5.60  
5.58  
5.49  
5.48  
5.46  
5.46  
-3.84

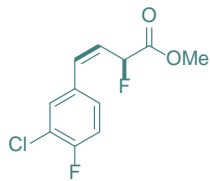

**3s**  
**<sup>1</sup>H NMR** (400 MHz, CDCl<sub>3</sub>)

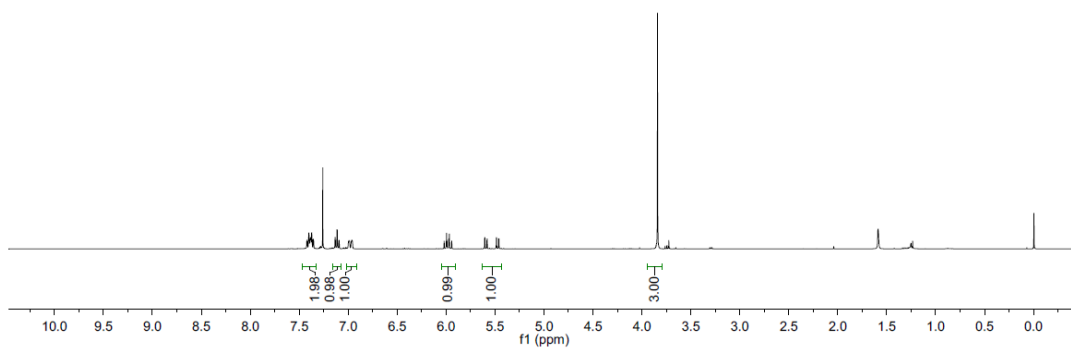

168.82  
168.56  
156.84  
154.34  
130.85  
130.08  
130.04  
129.98  
129.94  
128.87  
128.84  
128.82  
125.84  
125.63  
124.45  
124.30  
124.30  
124.30  
121.55  
121.37  
85.36  
77.25  
76.93  
76.61  
-52.76

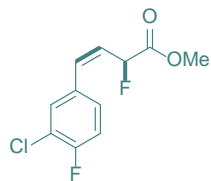

**3s**  
**<sup>13</sup>C NMR** (101 MHz, CDCl<sub>3</sub>)

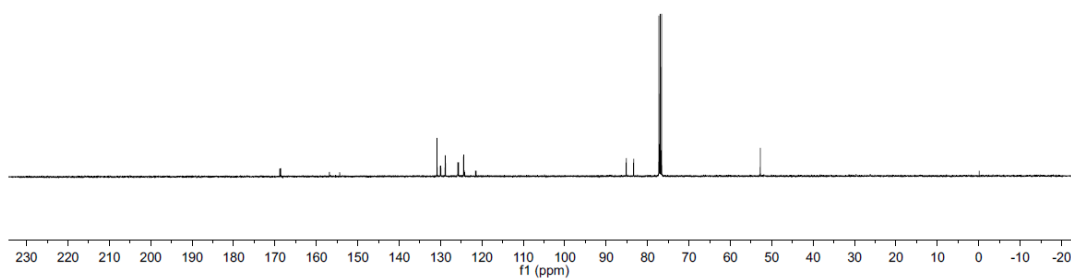

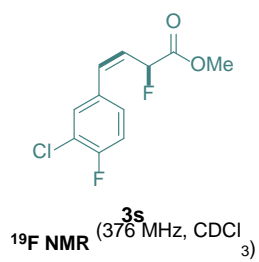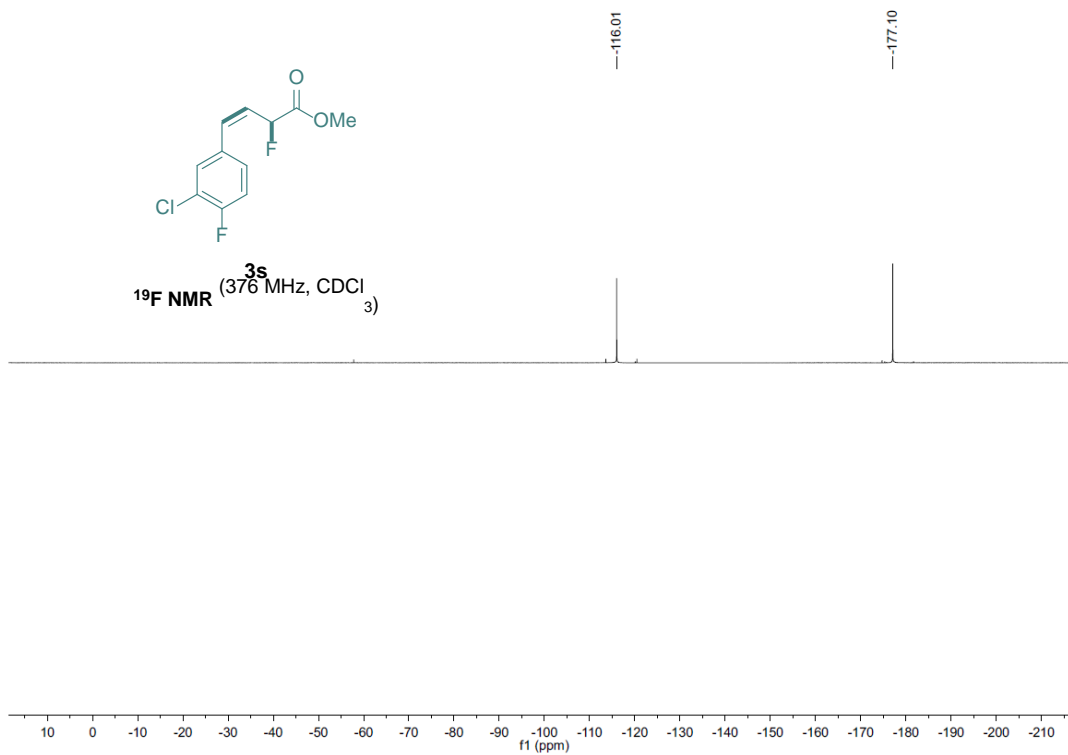

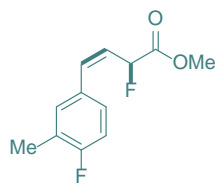

**3t**  
 $^1\text{H NMR}$  (400 MHz,  $\text{CDCl}_3$ )

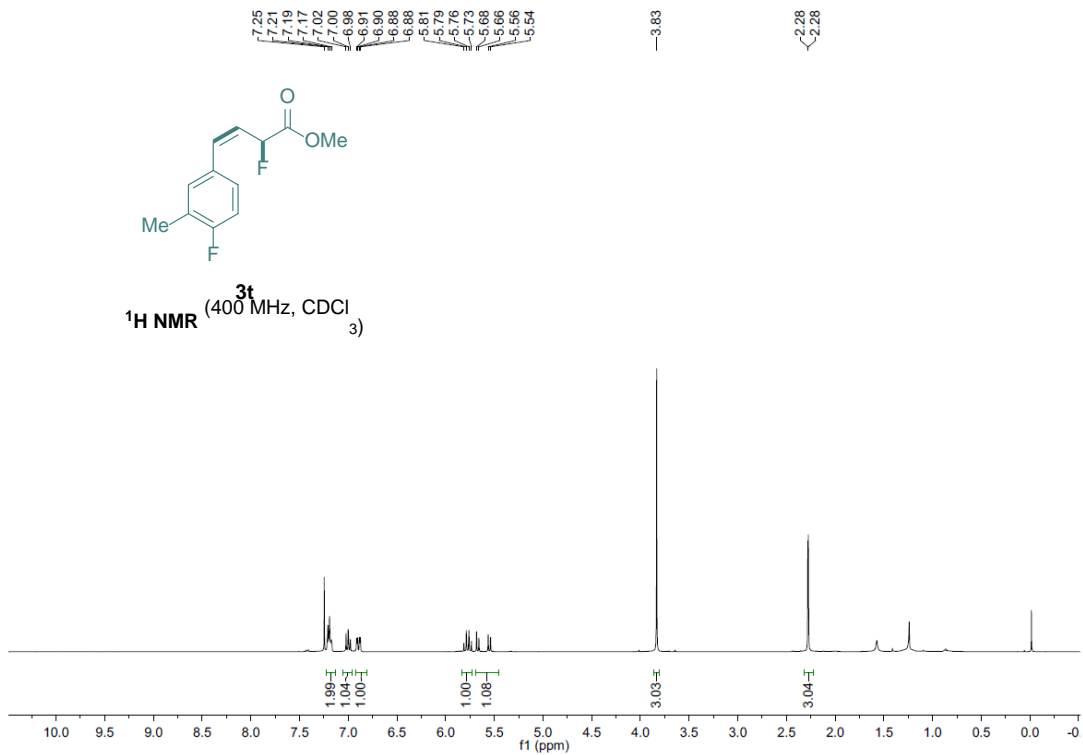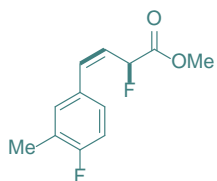

**3t**  
 $^{13}\text{C NMR}$  (101 MHz,  $\text{CDCl}_3$ )

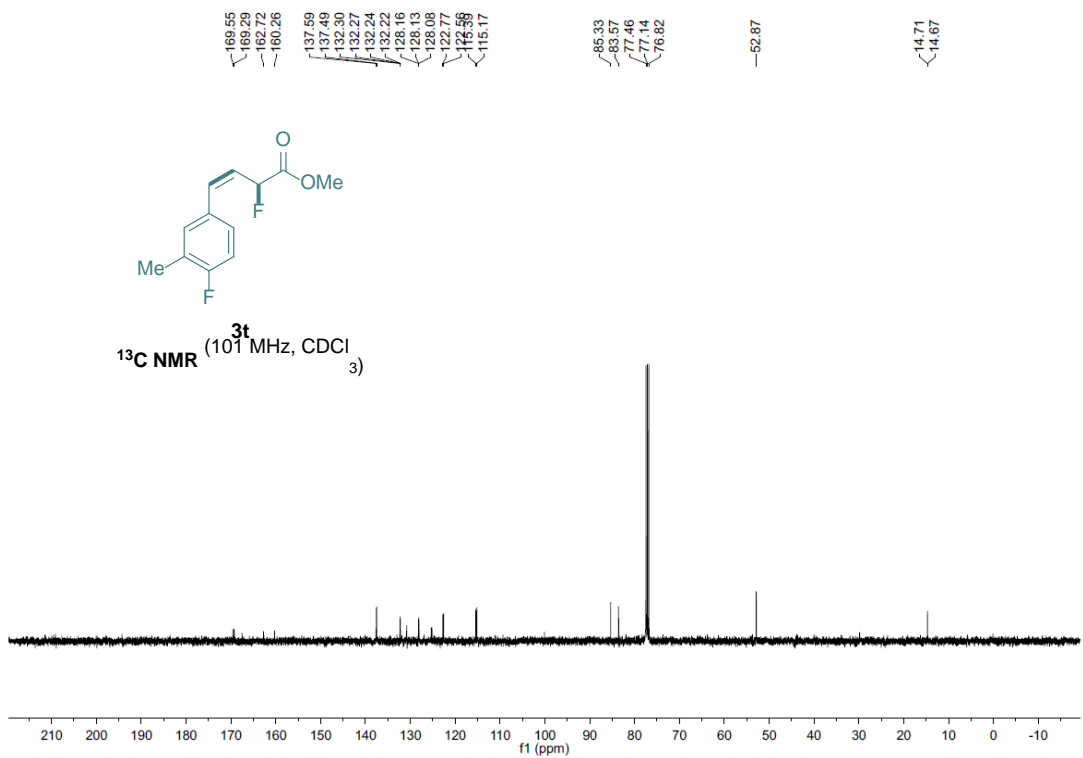

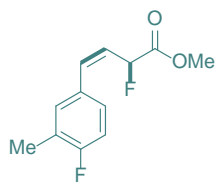

**<sup>19</sup>F NMR** (**3t**  
(376 MHz, CDCl<sub>3</sub>))

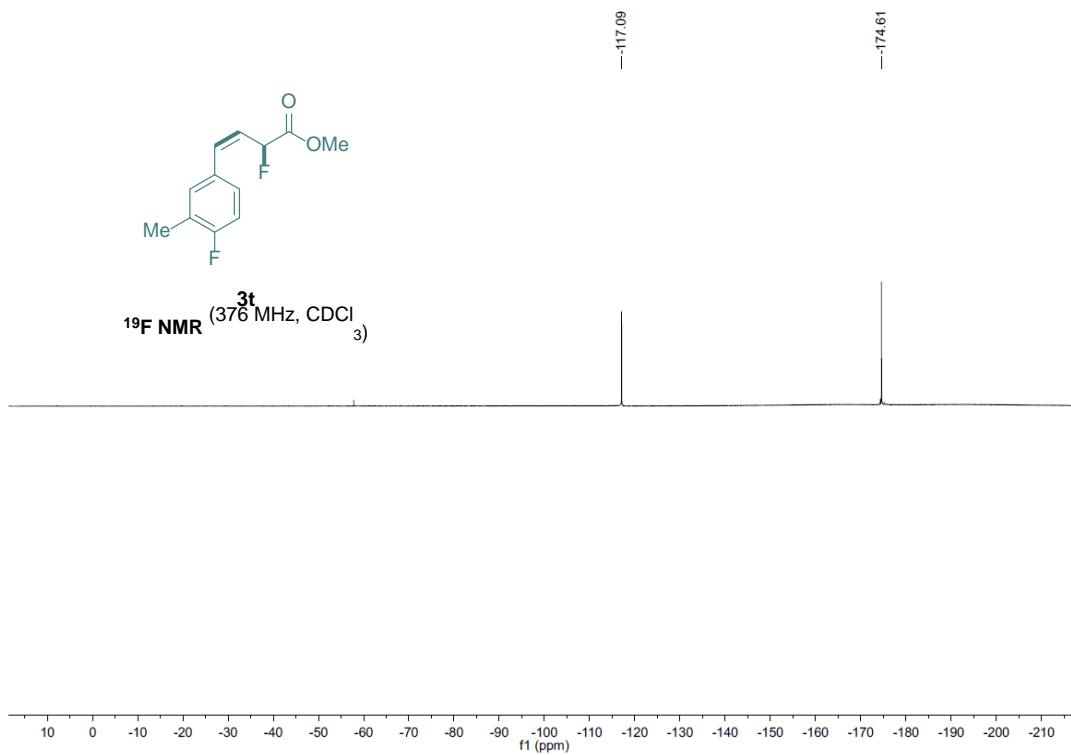



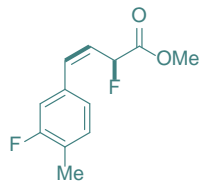

**<sup>1</sup>H NMR** (**3u**, 400 MHz, CDCl<sub>3</sub>)

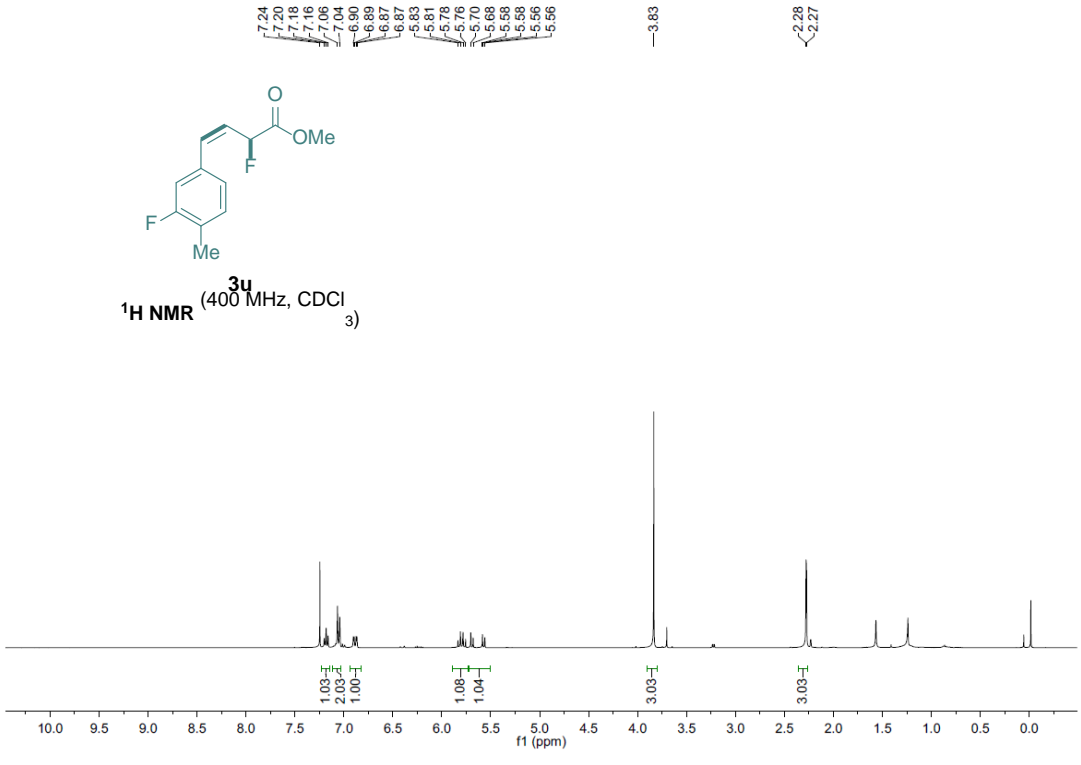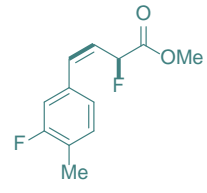

**<sup>13</sup>C NMR** (**3u**, 101 MHz, CDCl<sub>3</sub>)

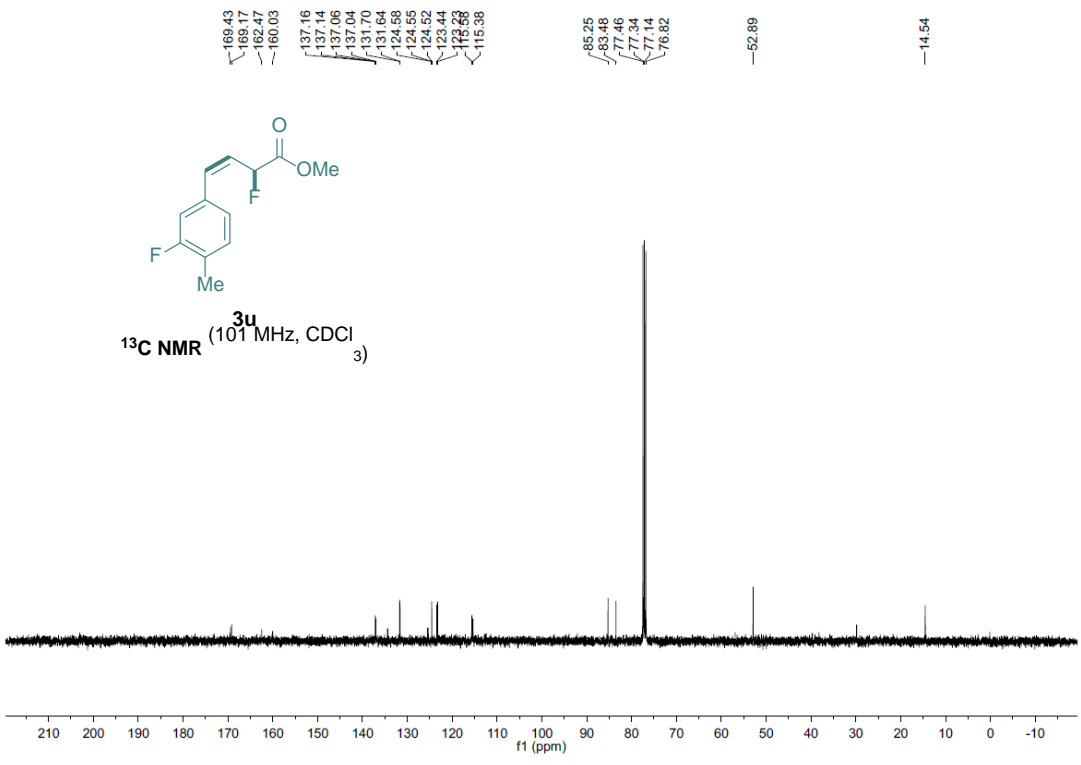

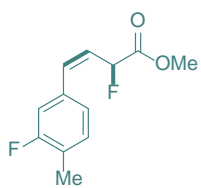

**<sup>19</sup>F NMR** (376 MHz, CDCl<sub>3</sub>)

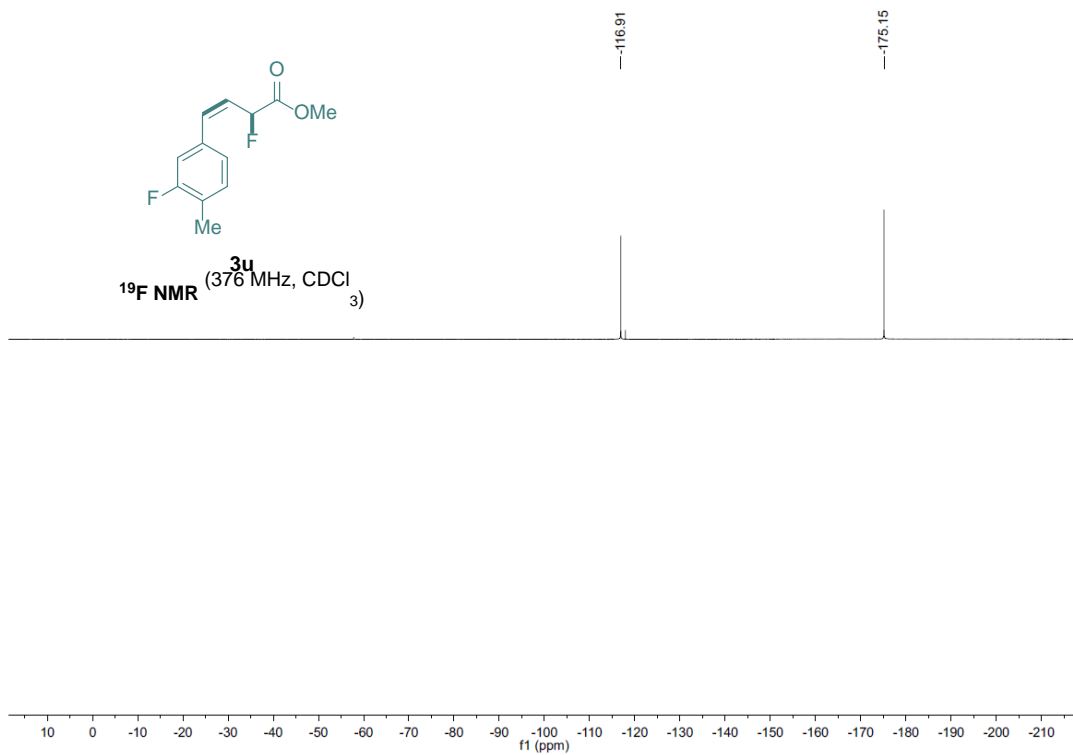

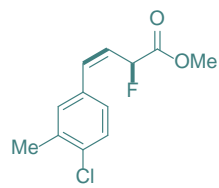

**<sup>1</sup>H NMR** (400 MHz, CDCl<sub>3</sub>)

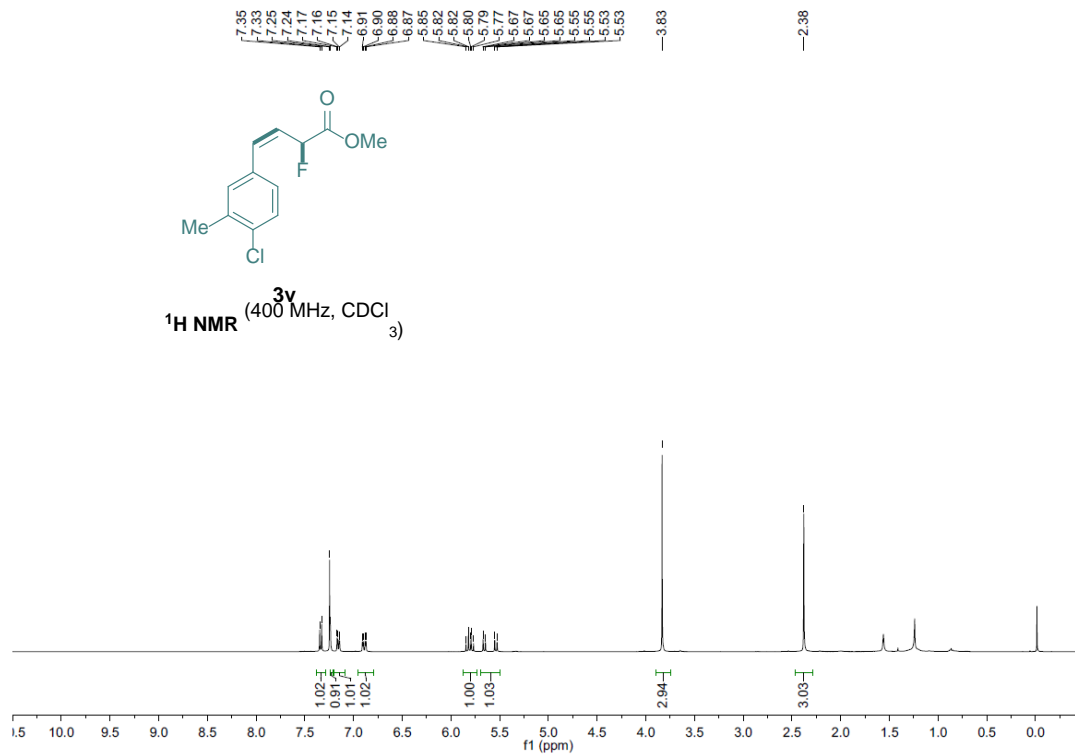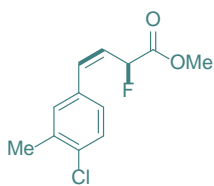

**<sup>13</sup>C NMR** (101 MHz, CDCl<sub>3</sub>)

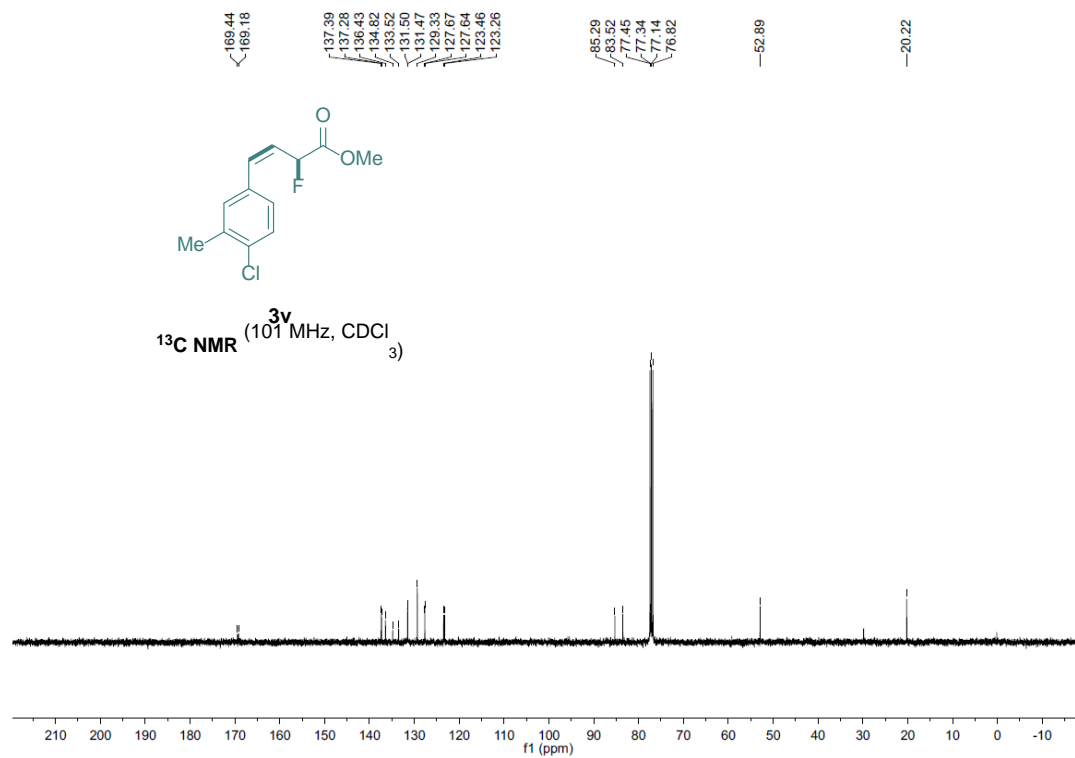

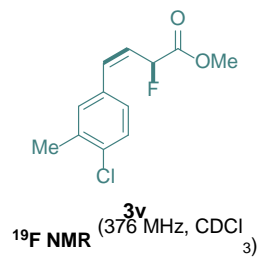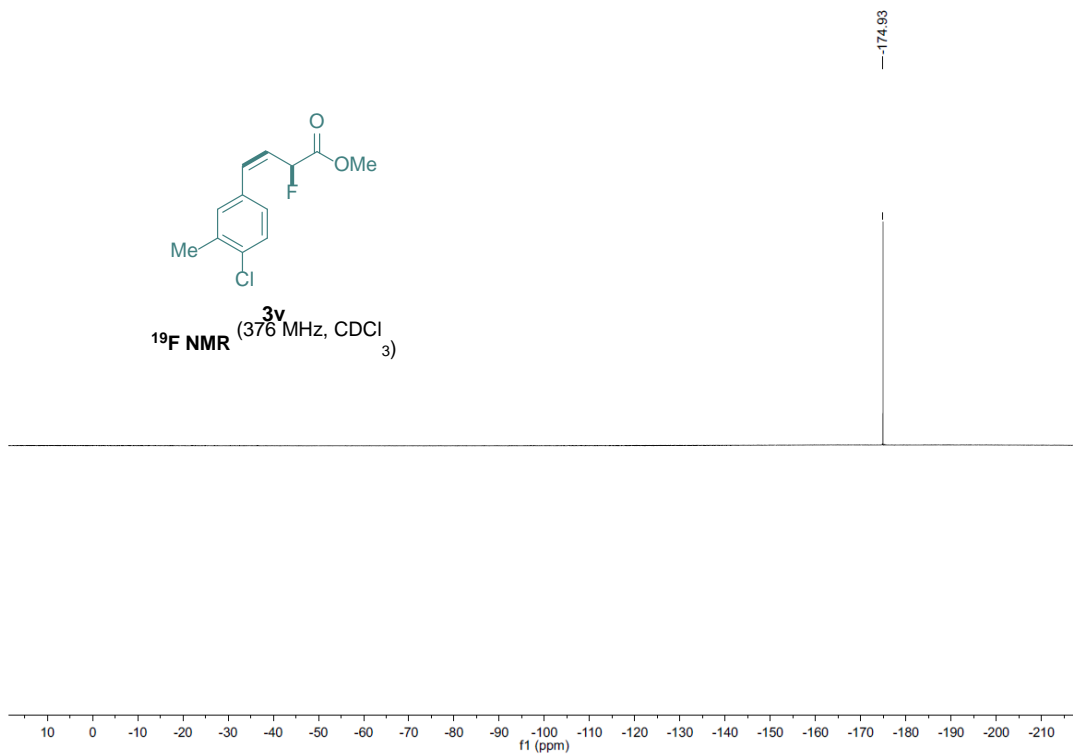

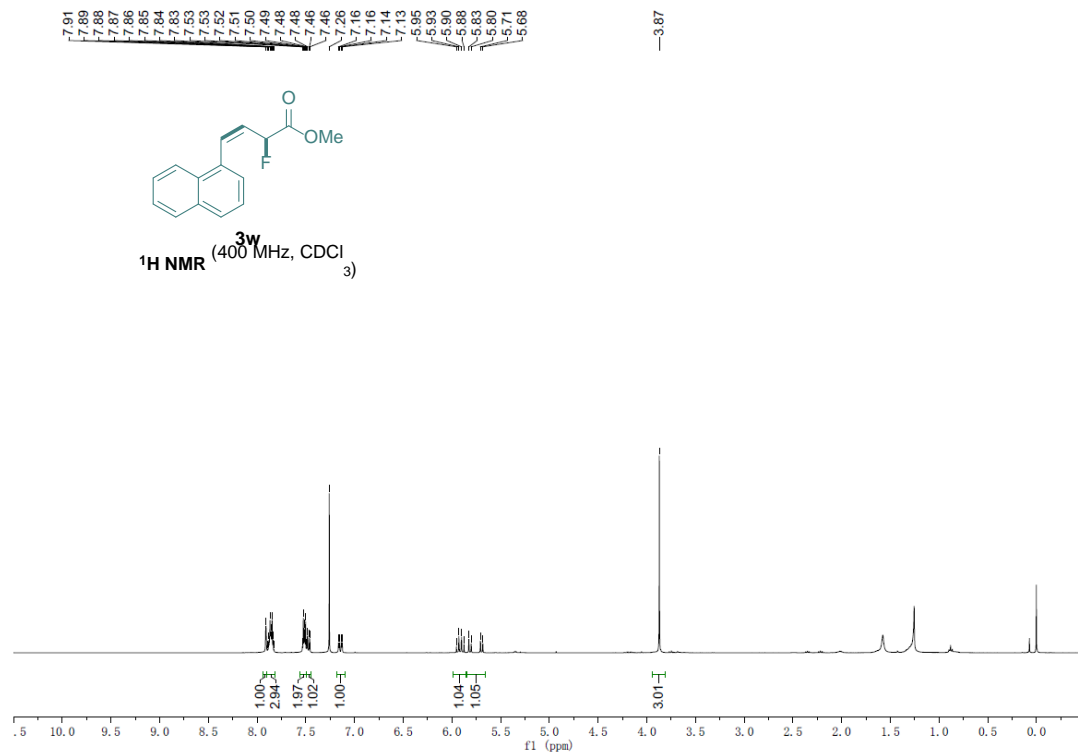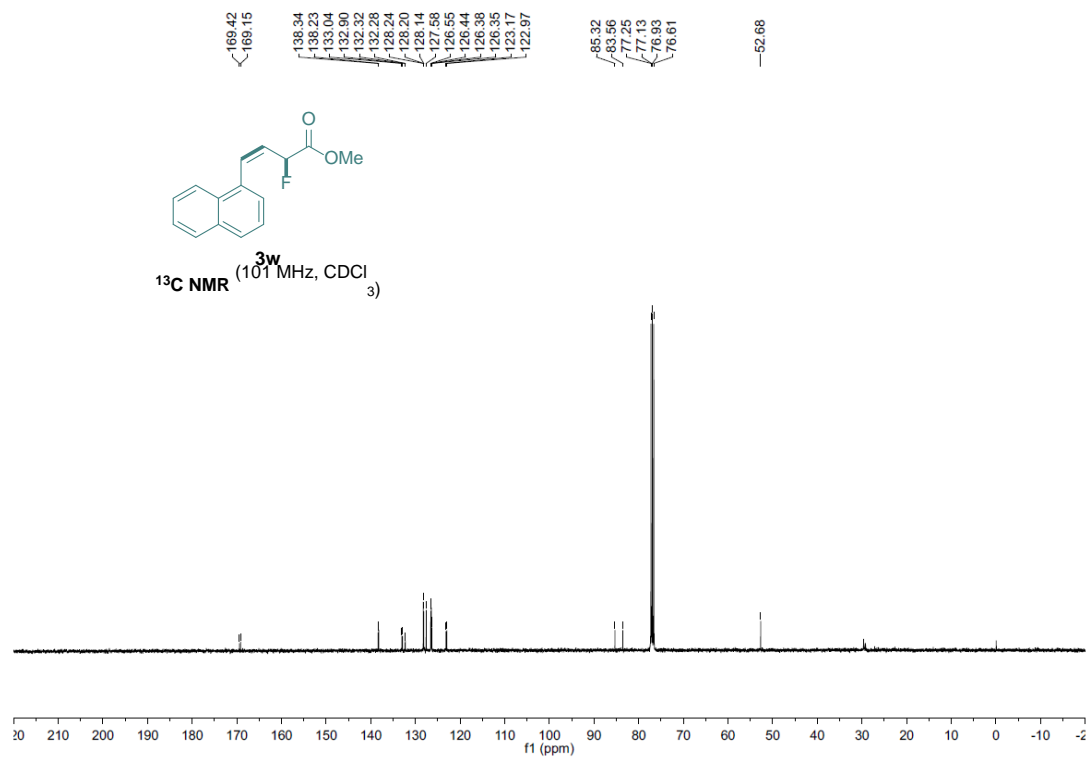

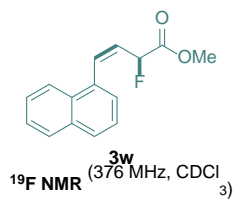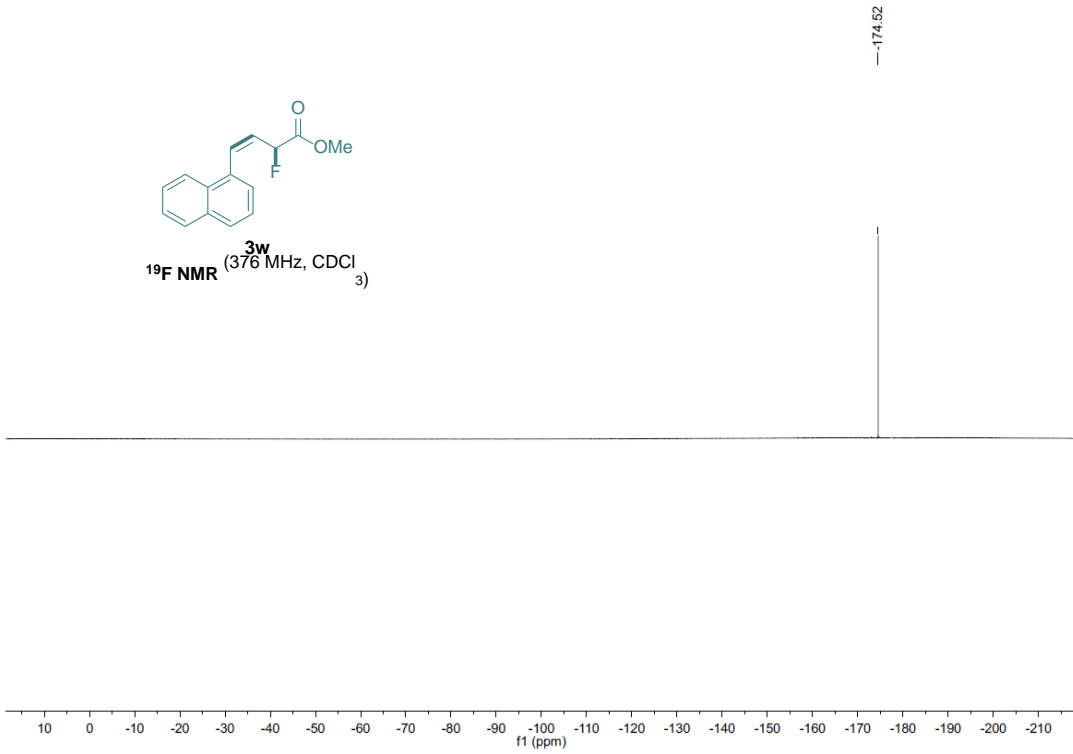

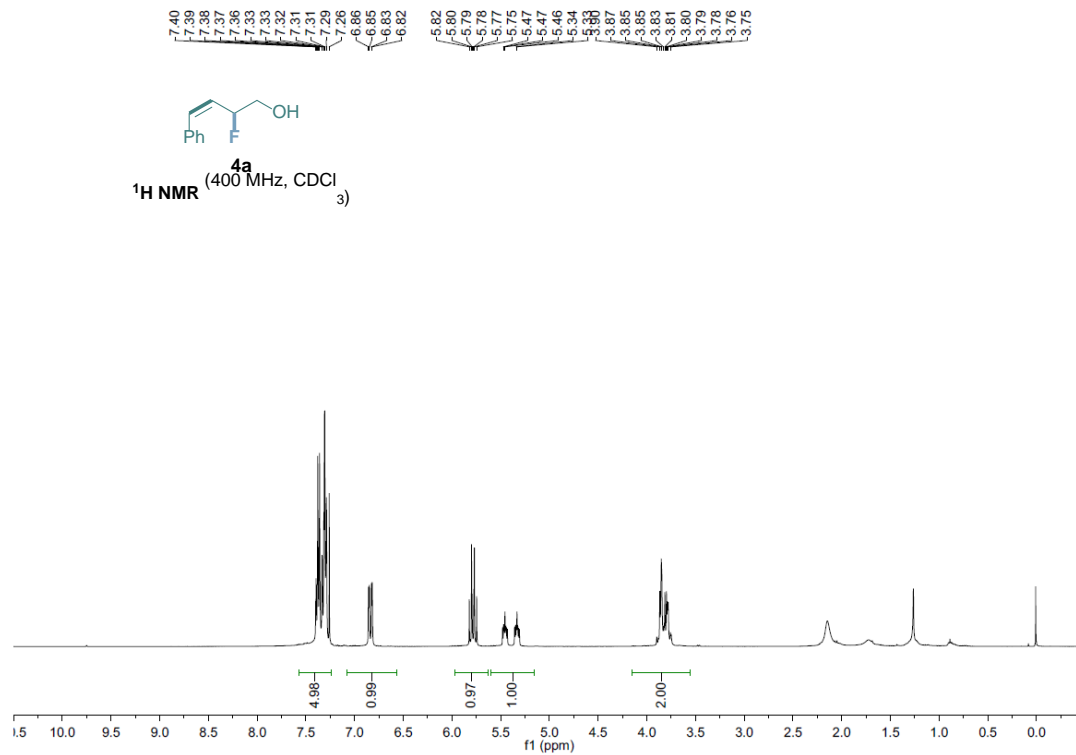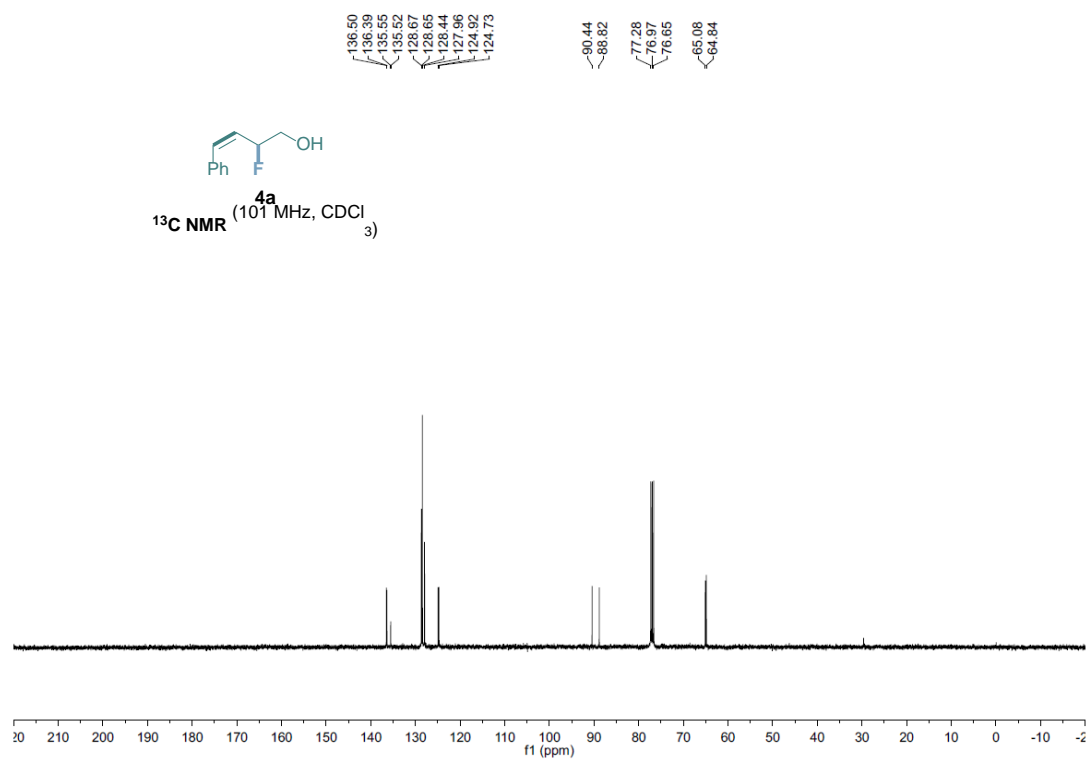

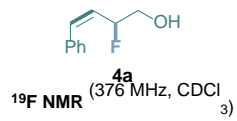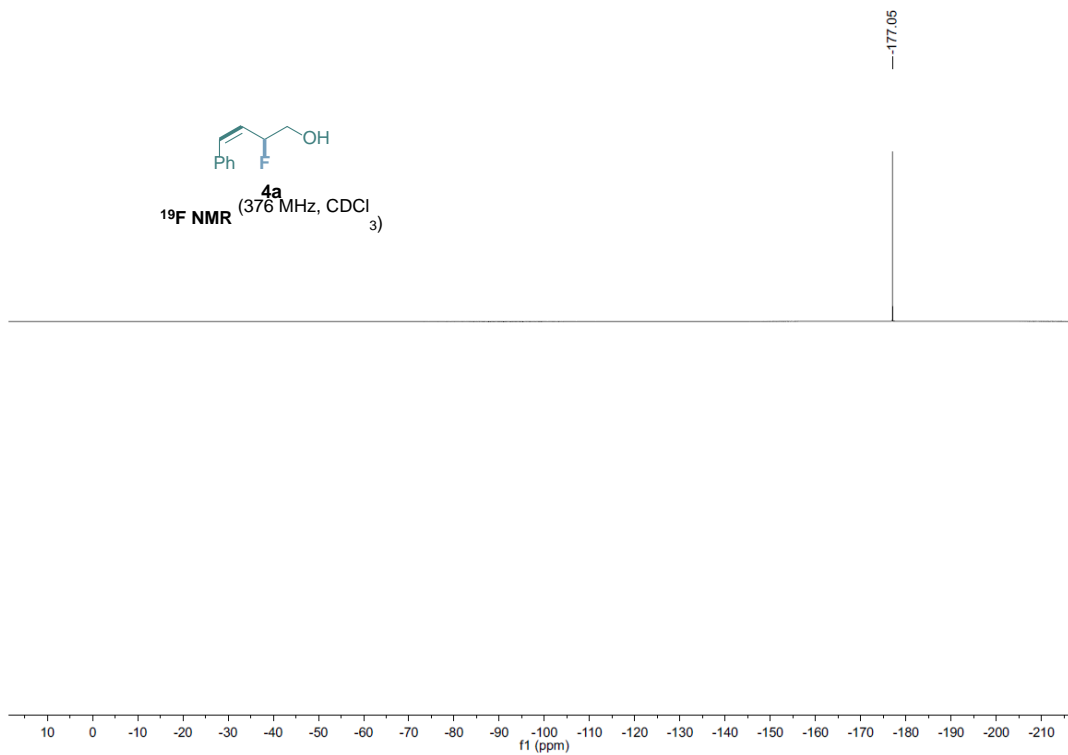



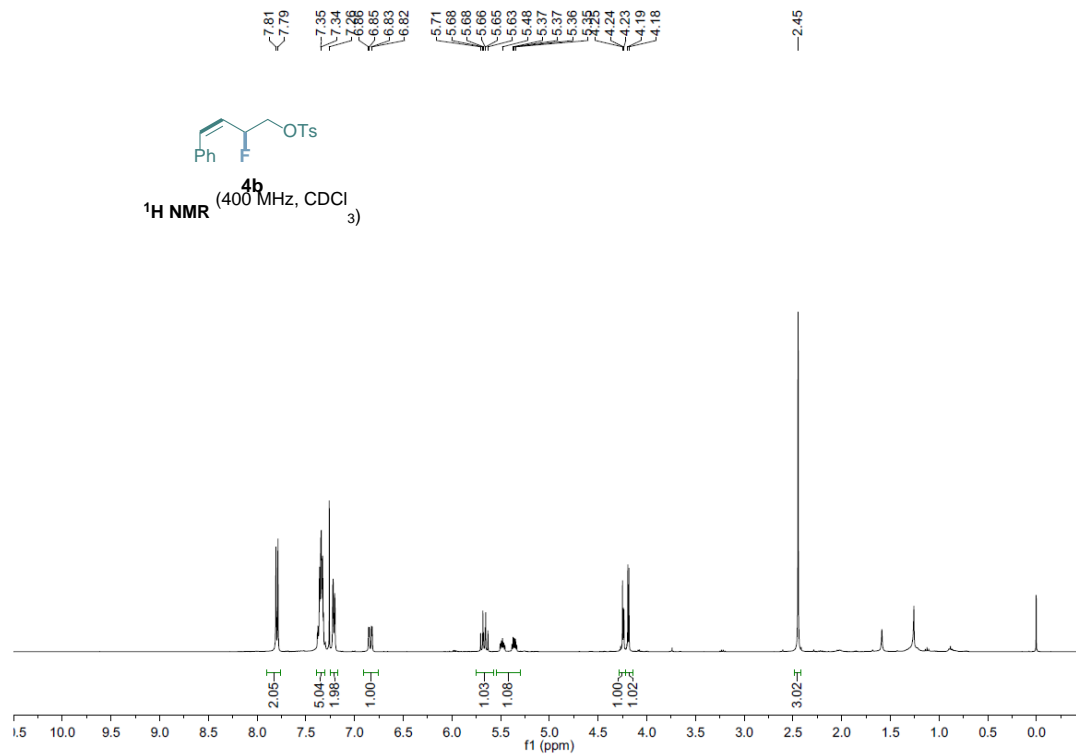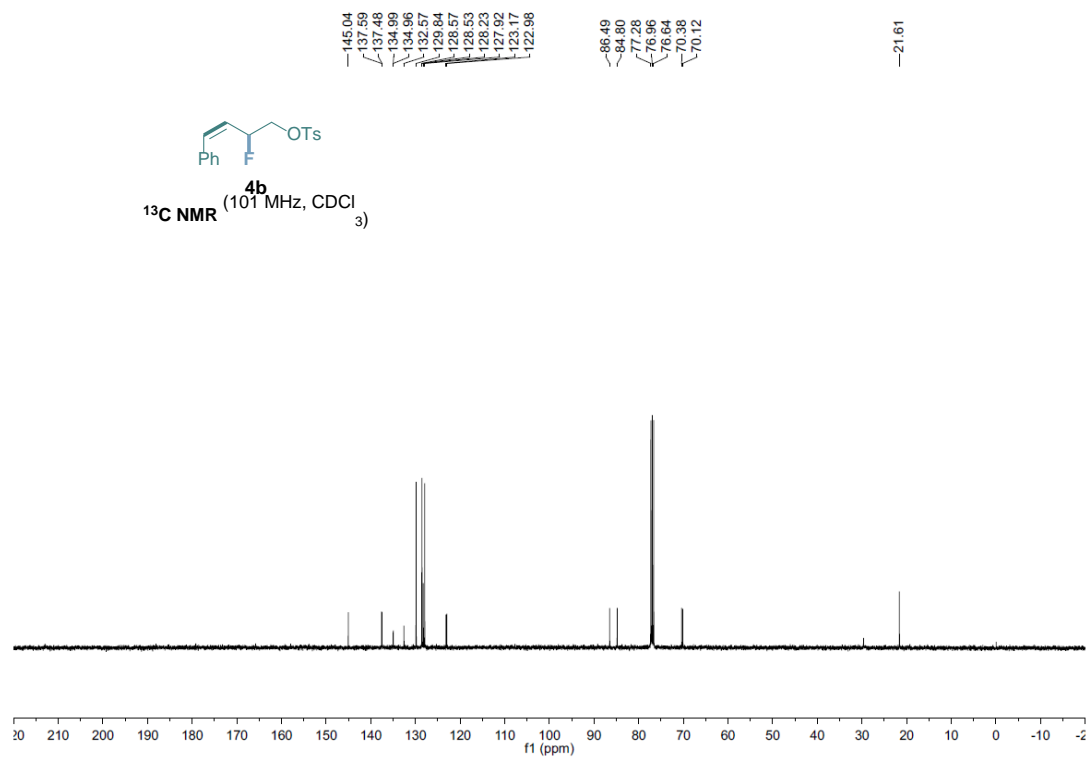

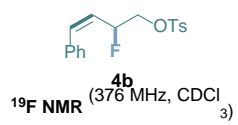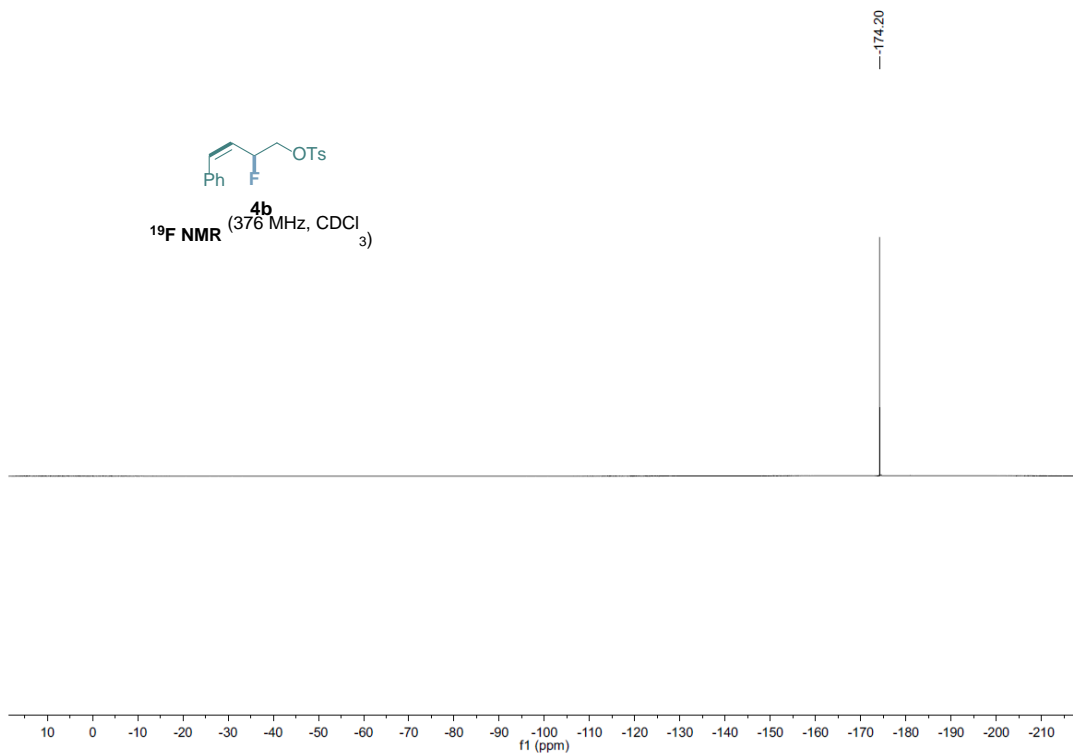

9.28  
9.26  
8.69  
8.67  
8.25  
8.17  
8.08  
8.06  
7.43  
7.42  
7.41  
7.41  
7.34  
7.26  
6.84  
6.83  
6.00  
5.98  
5.96  
5.95  
5.93  
5.84  
5.83  
4.80  
4.77  
4.76  
4.74  
4.73  
4.71  
4.70  
4.68  
4.66

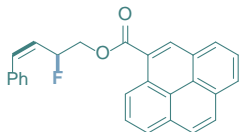

**4c**  
<sup>1</sup>H NMR (400 MHz, CDCl<sub>3</sub>)

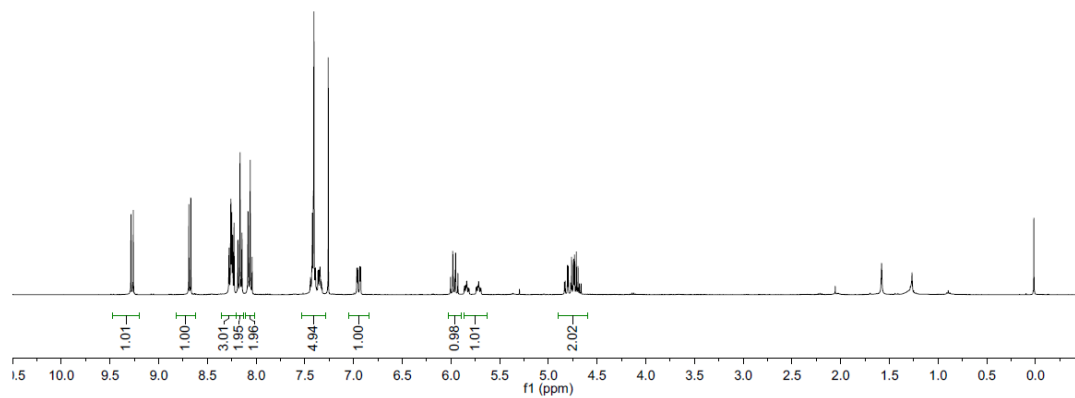

167.45  
136.98  
136.87  
134.51  
131.29  
130.91  
130.27  
129.73  
129.58  
128.79  
128.76  
128.56  
128.55  
128.11  
127.08  
126.33  
126.25  
126.22  
124.71  
124.60  
124.41  
124.06  
87.48  
85.74  
77.28  
76.96  
76.64  
66.22  
65.97

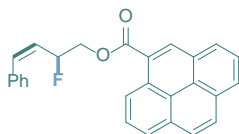

**4c**  
<sup>13</sup>C NMR (101 MHz, CDCl<sub>3</sub>)

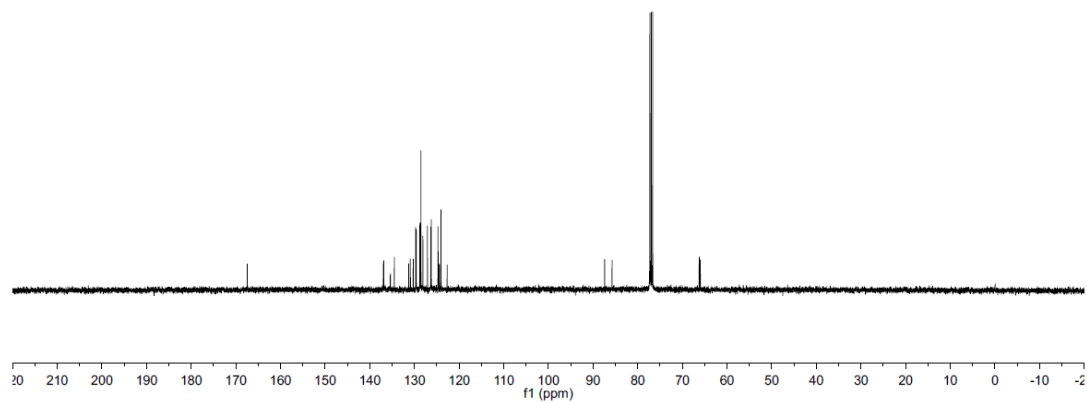

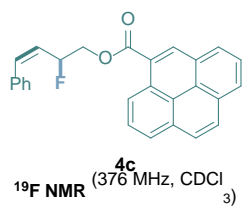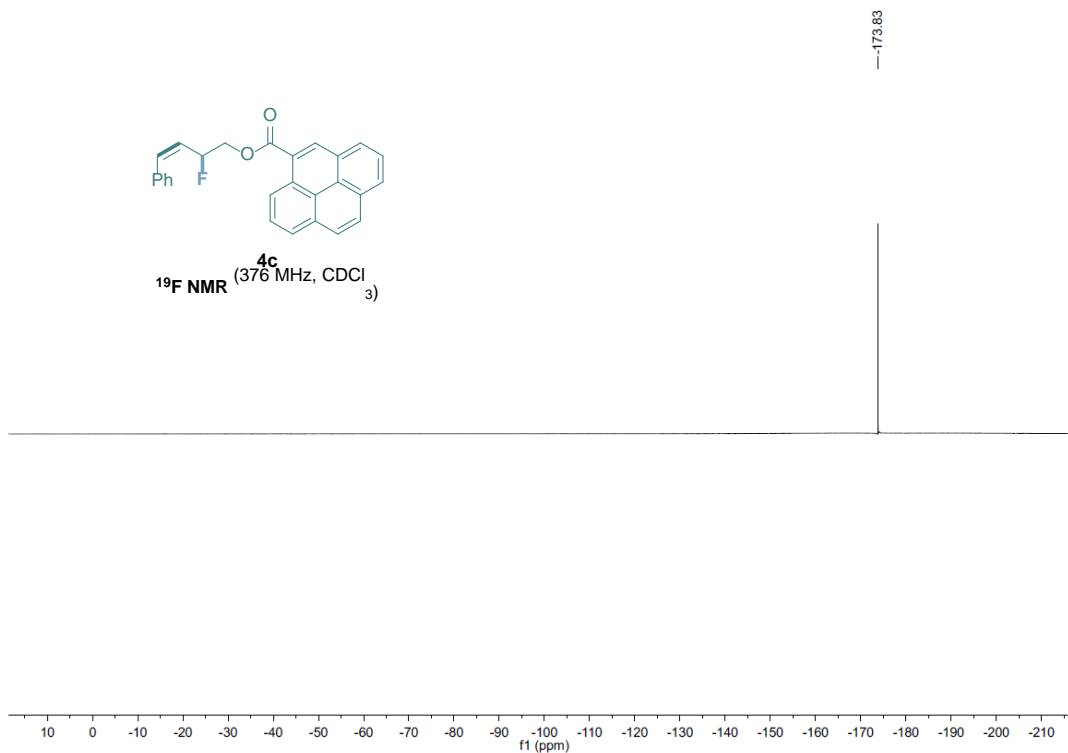

Supplement: d0cc07264h1.pdf [file d0cc07264h1.pdf]
